# Supplementary material for: Transcriptomic and biochemical insights into fall armyworm (Spodoptera frugiperda) responses on silicon-treated maize
Source: PeerJ. 2024 Feb 23;12:e16859. doi: 10.7717/peerj.16859 (PMC10896081; doi:10.7717/peerj.16859)
Supplement: Supplemental Information 2 [file peerj-12-16859-s002.xlsx]

## Sheet: Control vs K2SiO3.KEGG
#KEGG_n	216	KEGG_N	6668
#Pathway	ko_ID	DIFFgene	gene	DIFFgene_all	gene_all
Glycerolipid metabolism	map00561	12	150	216	6668	TRINITY_DN21327_c3_g3;TRINITY_DN23073_c2_g1;TRINITY_DN23073_c2_g3;TRINITY_DN23073_c3_g1;TRINITY_DN24376_c1_g1;TRINITY_DN25955_c1_g1;TRINITY_DN20983_c0_g1;TRINITY_DN20997_c0_g2;TRINITY_DN21019_c0_g1;TRINITY_DN22100_c3_g3;TRINITY_DN22179_c2_g1;TRINITY_DN22342_c1_g1	K00011+K00011+K00011+K00011+K00011+K00011+K00901+K00011+K00901+K14073+K14073
Spliceosome	map03040	2	234	216	6668	TRINITY_DN27474_c0_g2;TRINITY_DN32170_c4_g2	K03283+K12897
Caffeine metabolism	map00232	5	49	216	6668	TRINITY_DN15593_c0_g1;TRINITY_DN16832_c0_g1;TRINITY_DN16907_c0_g1;TRINITY_DN23362_c0_g4;TRINITY_DN24896_c1_g2	K00106+K00106+K00106+K00365+K00106
Ubiquitin mediated proteolysis	map04120	2	172	216	6668	TRINITY_DN22138_c2_g3;TRINITY_DN25118_c0_g1	K03871+K03871
Lysosome	map04142	6	233	216	6668	TRINITY_DN21985_c3_g1;TRINITY_DN25371_c0_g2;TRINITY_DN25780_c5_g1;TRINITY_DN28329_c1_g1;TRINITY_DN30059_c0_g2;TRINITY_DN32154_c5_g1	K13443+K01052+K19363+K14410+K01052+K01158
Insulin signaling pathway	map04910	1	13	216	6668	TRINITY_DN24222_c6_g4	K15909
Fatty acid degradation	map00071	3	133	216	6668	TRINITY_DN14000_c0_g1;TRINITY_DN27846_c5_g1;TRINITY_DN10100_c0_g1	K00121+K00232+K07513
Apoptosis - fly	map04214	4	114	216	6668	TRINITY_DN19664_c0_g1;TRINITY_DN29250_c1_g1;TRINITY_DN29276_c1_g2;TRINITY_DN32092_c6_g1	K07611+K04374+K09428+K10798
Purine metabolism	map00230	12	277	216	6668	TRINITY_DN15593_c0_g1;TRINITY_DN16832_c0_g1;TRINITY_DN16907_c0_g1;TRINITY_DN22402_c3_g1;TRINITY_DN23362_c0_g4;TRINITY_DN24896_c1_g2;TRINITY_DN29802_c2_g1;TRINITY_DN30253_c2_g1;TRINITY_DN31924_c4_g1;TRINITY_DN31924_c4_g3;TRINITY_DN31929_c3_g1;TRINITY_DN31929_c3_g2	K00106+K00106+K00106+K00939+K00365+K00106+K00364+K00602+K00106+K00106+K00106+K00106
Peroxisome	map04146	4	275	216	6668	TRINITY_DN15593_c0_g1;TRINITY_DN16832_c0_g1;TRINITY_DN16907_c0_g1;TRINITY_DN18260_c0_g1	K00106+K00106+K00106+K13348
Pentose and glucuronate interconversions	map00040	10	144	216	6668	TRINITY_DN18609_c0_g1;TRINITY_DN21327_c3_g3;TRINITY_DN21990_c0_g1;TRINITY_DN23073_c2_g1;TRINITY_DN23073_c2_g3;TRINITY_DN23073_c3_g1;TRINITY_DN24376_c1_g1;TRINITY_DN25955_c1_g1;TRINITY_DN27716_c2_g1;TRINITY_DN28150_c1_g1	K00699+K00011+K00699+K00011+K00011+K00011+K00011+K00011+K00008+K00699
Homologous recombination	map03440	1	52	216	6668	TRINITY_DN15460_c0_g1	K19528
Alanine, aspartate and glutamate metabolism	map00250	7	97	216	6668	TRINITY_DN24654_c1_g2;TRINITY_DN24881_c0_g1;TRINITY_DN24881_c0_g2;TRINITY_DN25691_c0_g1;TRINITY_DN29585_c0_g1;TRINITY_DN30820_c1_g1;TRINITY_DN30820_c1_g6	K13524+K01940+K01940+K01953+K00820+K00827+K00827
Arachidonic acid metabolism	map00590	4	56	216	6668	TRINITY_DN17128_c0_g1;TRINITY_DN19971_c0_g2;TRINITY_DN25897_c0_g1;TRINITY_DN27776_c0_g1	K04097+K00079+K00079+K00079
Circadian rhythm - fly	map04711	2	15	216	6668	TRINITY_DN31502_c1_g2;TRINITY_DN31942_c0_g1	K12074+K02633
Glutathione metabolism	map00480	14	143	216	6668	TRINITY_DN17128_c0_g1;TRINITY_DN23267_c1_g1;TRINITY_DN26943_c0_g3;TRINITY_DN30691_c0_g1;TRINITY_DN13351_c1_g1;TRINITY_DN14856_c0_g1;TRINITY_DN17516_c0_g1;TRINITY_DN19852_c0_g1;TRINITY_DN20449_c2_g3;TRINITY_DN25632_c1_g1;TRINITY_DN27855_c0_g1;TRINITY_DN29068_c0_g2;TRINITY_DN29970_c1_g1;TRINITY_DN32917_c0_g1	K04097+K00799+K00310+K00802+K00797+K05361+K00031+K00682+K04097+K21456+K11205+K11140+K00799+K10807
Inositol phosphate metabolism	map00562	2	107	216	6668	TRINITY_DN23746_c0_g1;TRINITY_DN24222_c6_g4	K00469+K15909
Cysteine and methionine metabolism	map00270	6	113	216	6668	TRINITY_DN19257_c3_g4;TRINITY_DN21947_c3_g1;TRINITY_DN28109_c0_g1;TRINITY_DN30691_c0_g1;TRINITY_DN30820_c1_g1;TRINITY_DN30820_c1_g6	K00456+K00058+K01758+K00802+K00827+K00827
Metabolic pathways	map01100	37	2827	216	6668	TRINITY_DN10027_c0_g1;TRINITY_DN11206_c0_g1;TRINITY_DN11444_c0_g1;TRINITY_DN12031_c0_g1;TRINITY_DN12079_c0_g1;TRINITY_DN12096_c1_g1;TRINITY_DN12114_c0_g1;TRINITY_DN12841_c0_g1;TRINITY_DN13460_c0_g1;TRINITY_DN13688_c0_g1;TRINITY_DN14000_c0_g1;TRINITY_DN14862_c0_g1;TRINITY_DN15530_c0_g1;TRINITY_DN16201_c0_g1;TRINITY_DN17008_c0_g1;TRINITY_DN17699_c0_g1;TRINITY_DN18101_c0_g1;TRINITY_DN1856_c0_g1;TRIN…	K00850+K00844+K01834+K01803+K01895+K00927+K00002+K00927+K00016+K00873+K00121+K00627+K00134+K01689+K00873+K00134+K00134+K00627+K00627+K01596+K01785+K08074+K03103+K01596+K00382+K00927+K00128+K01623+K00873+K03103+K03103+K00844+K01834+K00128+K01084+K00128+K03103
ABC transporters	map02010	1	81	216	6668	TRINITY_DN31847_c2_g1	K05648
Protein export	map03060	1	39	216	6668	TRINITY_DN19798_c0_g1	K03217
Base excision repair	map03410	1	38	216	6668	TRINITY_DN32092_c6_g1	K10798
Other glycan degradation	map00511	1	48	216	6668	TRINITY_DN22890_c0_g1	K01206
ECM-receptor interaction	map04512	5	108	216	6668	TRINITY_DN19420_c0_g1;TRINITY_DN22821_c1_g1;TRINITY_DN26242_c5_g1;TRINITY_DN26242_c5_g3;TRINITY_DN26242_c5_g4	K04659+K23573+K06237+K06237+K06237
alpha-Linolenic acid metabolism	map00592	1	43	216	6668	TRINITY_DN27846_c5_g1	K00232
Mitophagy - animal	map04137	1	68	216	6668	TRINITY_DN29250_c1_g1	K04374
Arginine and proline metabolism	map00330	11	91	216	6668	TRINITY_DN19507_c0_g1;TRINITY_DN19507_c1_g2;TRINITY_DN30691_c0_g1;TRINITY_DN31186_c1_g1;TRINITY_DN31263_c1_g1;TRINITY_DN15519_c0_g1;TRINITY_DN23238_c7_g1;TRINITY_DN28001_c0_g1;TRINITY_DN28454_c0_g2;TRINITY_DN31602_c4_g1;TRINITY_DN33165_c0_g1	K00934+K00934+K00802+K13240+K00318+K13240+K01581+K00128+K00128+K00128+K14454
Arginine biosynthesis	map00220	5	65	216	6668	TRINITY_DN21253_c0_g2;TRINITY_DN21987_c0_g1;TRINITY_DN24881_c0_g1;TRINITY_DN24881_c0_g2;TRINITY_DN31186_c1_g1	K14677+K14677+K01940+K01940+K13240
MAPK signaling pathway - fly	map04013	10	170	216	6668	TRINITY_DN10320_c0_g1;TRINITY_DN14086_c0_g1;TRINITY_DN15591_c0_g1;TRINITY_DN16886_c0_g1;TRINITY_DN20859_c0_g1;TRINITY_DN23251_c3_g1;TRINITY_DN25881_c0_g1;TRINITY_DN25007_c0_g1;TRINITY_DN27557_c0_g1;TRINITY_DN29147_c2_g1	K18529+K13578+K13411+K05088+K08840+K12378+K20214+K04368+K08840+K04448
Taurine and hypotaurine metabolism	map00430	1	6	216	6668	TRINITY_DN19257_c3_g4	K00456
AGE-RAGE signaling pathway in diabetic complications	map04933	3	70	216	6668	TRINITY_DN26195_c1_g1;TRINITY_DN26242_c5_g1;TRINITY_DN26242_c5_g3	K19720+K06237+K06237
Pyruvate metabolism	map00620	12	133	216	6668	TRINITY_DN31084_c2_g2;TRINITY_DN11350_c0_g1;TRINITY_DN12079_c0_g1;TRINITY_DN13272_c0_g1;TRINITY_DN14862_c0_g1;TRINITY_DN16298_c1_g1;TRINITY_DN18102_c0_g1;TRINITY_DN21619_c4_g2;TRINITY_DN24960_c0_g1;TRINITY_DN26877_c0_g1;TRINITY_DN29466_c3_g2;TRINITY_DN32380_c0_g1	K01679+K00102+K01895+K00026+K00627+K11262+K00026+K01679+K00627+K00049+K01596+K00161
One carbon pool by folate	map00670	2	39	216	6668	TRINITY_DN28588_c1_g1;TRINITY_DN30253_c2_g1	K00600+K00602
Sulfur metabolism	map00920	1	24	216	6668	TRINITY_DN33155_c0_g1	K00387
Protein processing in endoplasmic reticulum	map04141	10	271	216	6668	TRINITY_DN17275_c0_g1;TRINITY_DN20011_c0_g1;TRINITY_DN21324_c0_g1;TRINITY_DN24707_c0_g1;TRINITY_DN24707_c0_g2;TRINITY_DN25038_c1_g2;TRINITY_DN27474_c0_g2;TRINITY_DN29250_c1_g1;TRINITY_DN31123_c0_g1;TRINITY_DN31123_c0_g2	K09542+K09542+K09542+K09542+K09542+K04079+K03283+K04374+K08054+K08054
Ubiquinone and other terpenoid-quinone biosynthesis	map00130	2	26	216	6668	TRINITY_DN25145_c1_g1;TRINITY_DN25997_c0_g1	K00457+K06126
Endocytosis	map04144	3	218	216	6668	TRINITY_DN23617_c0_g2;TRINITY_DN27474_c0_g2;TRINITY_DN29150_c0_g1	K12483+K03283+K12562
Retinol metabolism	map00830	3	96	216	6668	TRINITY_DN14000_c0_g1;TRINITY_DN18609_c0_g1;TRINITY_DN21990_c0_g1	K00121+K00699+K00699
Amino sugar and nucleotide sugar metabolism	map00520	13	113	216	6668	TRINITY_DN28679_c1_g2;TRINITY_DN29585_c0_g1;TRINITY_DN30237_c2_g1;TRINITY_DN10377_c0_g1;TRINITY_DN11055_c0_g1;TRINITY_DN14235_c0_g1;TRINITY_DN1497_c0_g1;TRINITY_DN19390_c0_g2;TRINITY_DN22123_c4_g2;TRINITY_DN22150_c0_g2;TRINITY_DN27028_c2_g2;TRINITY_DN31835_c2_g1;TRINITY_DN33433_c0_g1	K00972+K00820+K00621+K00326+K00972+K01183+K00972+K21749+K01183+K01443+K15779+K00844+K01835
Porphyrin and chlorophyll metabolism	map00860	7	105	216	6668	TRINITY_DN18609_c0_g1;TRINITY_DN19280_c0_g1;TRINITY_DN21990_c0_g1;TRINITY_DN25178_c1_g1;TRINITY_DN27040_c1_g2;TRINITY_DN27928_c0_g1;TRINITY_DN28150_c1_g1	K00699+K01885+K00699+K01764+K01772+K02259+K00699
Propanoate metabolism	map00640	2	86	216	6668	TRINITY_DN24654_c1_g2;TRINITY_DN27846_c5_g1	K13524+K00232
Citrate cycle (TCA cycle)	map00020	2	127	216	6668	TRINITY_DN15984_c0_g5;TRINITY_DN31084_c2_g2	K01681+K01679
Fructose and mannose metabolism	map00051	10	97	216	6668	TRINITY_DN21327_c3_g3;TRINITY_DN23073_c2_g1;TRINITY_DN23073_c2_g3;TRINITY_DN23073_c3_g1;TRINITY_DN24376_c1_g1;TRINITY_DN25955_c1_g1;TRINITY_DN27716_c2_g1;TRINITY_DN17688_c0_g1;TRINITY_DN29636_c2_g1;TRINITY_DN29682_c1_g1	K00011+K00011+K00011+K00011+K00011+K00011+K00008+K00011+K01809+K00850
Phenylalanine metabolism	map00360	1	32	216	6668	TRINITY_DN25145_c1_g1	K00457
Metabolism of xenobiotics by cytochrome P450	map00980	11	144	216	6668	TRINITY_DN14000_c0_g1;TRINITY_DN17128_c0_g1;TRINITY_DN18609_c0_g1;TRINITY_DN19971_c0_g2;TRINITY_DN21990_c0_g1;TRINITY_DN23267_c1_g1;TRINITY_DN25897_c0_g1;TRINITY_DN27776_c0_g1;TRINITY_DN28150_c1_g1;TRINITY_DN21650_c0_g1;TRINITY_DN24853_c5_g1	K00121+K04097+K00699+K00079+K00699+K00799+K00079+K00079+K00699+K00699+K00799
Tyrosine metabolism	map00350	4	52	216	6668	TRINITY_DN14000_c0_g1;TRINITY_DN20504_c4_g1;TRINITY_DN25145_c1_g1;TRINITY_DN25857_c1_g3	K00121+K00501+K00457+K00451
Galactose metabolism	map00052	7	102	216	6668	TRINITY_DN21212_c0_g1;TRINITY_DN21327_c3_g3;TRINITY_DN23073_c2_g1;TRINITY_DN23073_c2_g3;TRINITY_DN23073_c3_g1;TRINITY_DN24376_c1_g1;TRINITY_DN25955_c1_g1	K01785+K00011+K00011+K00011+K00011+K00011+K00011
Thiamine metabolism	map00730	2	22	216	6668	TRINITY_DN22402_c3_g1;TRINITY_DN23171_c0_g1	K00939+K01077
Butanoate metabolism	map00650	1	35	216	6668	TRINITY_DN24654_c1_g2	K13524
Ribosome biogenesis in eukaryotes	map03008	4	146	216	6668	TRINITY_DN21490_c2_g1;TRINITY_DN22926_c0_g1;TRINITY_DN27072_c0_g1;TRINITY_DN27674_c0_g1	K13288+K11131+K07179+K14564
Glyoxylate and dicarboxylate metabolism	map00630	2	98	216	6668	TRINITY_DN15984_c0_g5;TRINITY_DN28588_c1_g1	K01681+K00600
RNA transport	map03013	3	272	216	6668	TRINITY_DN19486_c0_g2;TRINITY_DN19808_c4_g1;TRINITY_DN20159_c0_g1	K03259+K03257+K03257
Selenocompound metabolism	map00450	1	21	216	6668	TRINITY_DN28109_c0_g1	K01758
Biosynthesis of unsaturated fatty acids	map01040	2	98	216	6668	TRINITY_DN23944_c0_g1;TRINITY_DN27846_c5_g1	K00507+K00232
Glycolysis / Gluconeogenesis	map00010	12	156	216	6668	TRINITY_DN14000_c0_g1;TRINITY_DN21212_c0_g1;TRINITY_DN11444_c0_g1;TRINITY_DN12114_c0_g1;TRINITY_DN12841_c0_g1;TRINITY_DN13688_c0_g1;TRINITY_DN17008_c0_g1;TRINITY_DN21591_c0_g1;TRINITY_DN22288_c2_g2;TRINITY_DN23861_c1_g2;TRINITY_DN26777_c1_g1;TRINITY_DN31602_c4_g1	K00121+K01785+K01834+K00002+K00927+K00873+K00873+K08074+K00382+K00873+K00128+K00128
Ascorbate and aldarate metabolism	map00053	13	120	216	6668	TRINITY_DN18609_c0_g1;TRINITY_DN21990_c0_g1;TRINITY_DN23746_c0_g1;TRINITY_DN28150_c1_g1;TRINITY_DN17860_c0_g1;TRINITY_DN20396_c4_g1;TRINITY_DN20788_c1_g1;TRINITY_DN22000_c1_g1;TRINITY_DN22330_c2_g1;TRINITY_DN24531_c2_g1;TRINITY_DN25802_c0_g1;TRINITY_DN26769_c0_g1;TRINITY_DN31339_c4_g1	K00699+K00699+K00469+K00699+K00699+K00699+K00699+K00469+K01053+K01053+K00699+K00699+K00699
mRNA surveillance pathway	map03015	3	130	216	6668	TRINITY_DN28650_c0_g1;TRINITY_DN29613_c0_g1;TRINITY_DN31149_c1_g1	K11584+K14401+K14398
Nicotinate and nicotinamide metabolism	map00760	1	55	216	6668	TRINITY_DN31526_c1_g1	K01950
Phototransduction - fly	map04745	2	50	216	6668	TRINITY_DN24557_c0_g1;TRINITY_DN28463_c0_g1	K13805+K13807
Other types of O-glycan biosynthesis	map00514	1	20	216	6668	TRINITY_DN28820_c2_g1	K00728
Longevity regulating pathway - multiple species	map04213	7	132	216	6668	TRINITY_DN17275_c0_g1;TRINITY_DN20011_c0_g1;TRINITY_DN21324_c0_g1;TRINITY_DN24707_c0_g1;TRINITY_DN24707_c0_g2;TRINITY_DN27474_c0_g2;TRINITY_DN28626_c5_g2	K09542+K09542+K09542+K09542+K09542+K03283+K04565
mTOR signaling pathway	map04150	1	184	216	6668	TRINITY_DN19486_c0_g2	K03259
Drug metabolism - cytochrome P450	map00982	13	132	216	6668	TRINITY_DN14000_c0_g1;TRINITY_DN17128_c0_g1;TRINITY_DN18609_c0_g1;TRINITY_DN21990_c0_g1;TRINITY_DN23267_c1_g1;TRINITY_DN28150_c1_g1;TRINITY_DN10228_c0_g1;TRINITY_DN18210_c0_g1;TRINITY_DN20396_c4_g1;TRINITY_DN20438_c2_g1;TRINITY_DN24073_c0_g3;TRINITY_DN25661_c3_g1;TRINITY_DN31307_c2_g1	K00121+K04097+K00699+K00699+K00799+K00699+K00485+K00799+K00699+K00699+K00699+K04097+K00699
Insect hormone biosynthesis	map00981	2	59	216	6668	TRINITY_DN18148_c0_g1;TRINITY_DN20515_c0_g1	K10719+K10723
Fatty acid biosynthesis	map00061	13	85	216	6668	TRINITY_DN13186_c0_g1;TRINITY_DN15173_c0_g1;TRINITY_DN15759_c0_g1;TRINITY_DN18300_c0_g1;TRINITY_DN19370_c3_g1;TRINITY_DN20073_c1_g3;TRINITY_DN21264_c3_g2;TRINITY_DN22259_c1_g1;TRINITY_DN24170_c2_g4;TRINITY_DN28299_c0_g1;TRINITY_DN30807_c1_g2;TRINITY_DN31601_c3_g1;TRINITY_DN33370_c0_g1	K00665+K00665+K11262+K00665+K00665+K00665+K00665+K11262+K00665+K00665+K01897+K01897+K03955
Glycerophospholipid metabolism	map00564	2	117	216	6668	TRINITY_DN27219_c0_g1;TRINITY_DN28006_c0_g1	K00993+K01049
Phagosome	map04145	3	194	216	6668	TRINITY_DN19420_c0_g1;TRINITY_DN26492_c0_g1;TRINITY_DN27948_c0_g1	K04659+K07375+K04659
RNA degradation	map03018	6	109	216	6668	TRINITY_DN23128_c0_g1;TRINITY_DN23128_c0_g2;TRINITY_DN23128_c0_g3;TRINITY_DN23128_c0_g4;TRINITY_DN23128_c0_g5;TRINITY_DN28749_c1_g1	K04077+K04077+K04077+K04077+K04077+K04043
Phosphatidylinositol signaling system	map04070	1	109	216	6668	TRINITY_DN24222_c6_g4	K15909
RNA polymerase	map03020	2	58	216	6668	TRINITY_DN29094_c2_g1;TRINITY_DN31682_c1_g2	K03006+K03002
Mannose type O-glycan biosynthesis	map00515	1	9	216	6668	TRINITY_DN28820_c2_g1	K00728
Aminoacyl-tRNA biosynthesis	map00970	2	92	216	6668	TRINITY_DN19280_c0_g1;TRINITY_DN31012_c1_g1	K01885+K01873
Glycine, serine and threonine metabolism	map00260	10	103	216	6668	TRINITY_DN21947_c3_g1;TRINITY_DN28109_c0_g1;TRINITY_DN28588_c1_g1;TRINITY_DN29944_c0_g1;TRINITY_DN30820_c1_g1;TRINITY_DN30820_c1_g6;TRINITY_DN10772_c0_g1;TRINITY_DN19639_c0_g1;TRINITY_DN25491_c3_g1;TRINITY_DN26877_c0_g1	K00058+K01758+K00600+K00108+K00827+K00827+K01697+K00108+K00552+K00049
Drug metabolism - other enzymes	map00983	15	198	216	6668	TRINITY_DN15593_c0_g1;TRINITY_DN16832_c0_g1;TRINITY_DN16907_c0_g1;TRINITY_DN17169_c0_g1;TRINITY_DN17911_c0_g1;TRINITY_DN18609_c0_g1;TRINITY_DN21990_c0_g1;TRINITY_DN23267_c1_g1;TRINITY_DN24896_c1_g2;TRINITY_DN28150_c1_g1;TRINITY_DN30510_c0_g1;TRINITY_DN31924_c4_g1;TRINITY_DN31924_c4_g3;TRINITY_DN31929_c3_g1;TRINITY_DN31929_c3_g2	K00106+K00106+K00106+K00207+K01489+K00699+K00699+K00799+K00106+K00699+K00757+K00106+K00106+K00106+K00106
Pyrimidine metabolism	map00240	3	80	216	6668	TRINITY_DN17169_c0_g1;TRINITY_DN17911_c0_g1;TRINITY_DN30510_c0_g1	K00207+K01489+K00757
Toll and Imd signaling pathway	map04624	2	85	216	6668	TRINITY_DN25255_c8_g1;TRINITY_DN29198_c1_g1	K20674+K20692
Phosphonate and phosphinate metabolism	map00440	1	10	216	6668	TRINITY_DN27219_c0_g1	K00993
Wnt signaling pathway	map04310	1	131	216	6668	TRINITY_DN29798_c0_g1	K08110
Lysine degradation	map00310	1	138	216	6668	TRINITY_DN30440_c1_g1	K19199
beta-Alanine metabolism	map00410	4	94	216	6668	TRINITY_DN17169_c0_g1;TRINITY_DN24654_c1_g2;TRINITY_DN27846_c5_g1;TRINITY_DN30691_c0_g1	K00207+K13524+K00232+K00802
Oxidative phosphorylation	map00190	12	279	216	6668	TRINITY_DN12251_c0_g1;TRINITY_DN17877_c0_g1;TRINITY_DN18341_c0_g1;TRINITY_DN18904_c0_g1;TRINITY_DN19249_c1_g3;TRINITY_DN19314_c0_g1;TRINITY_DN20530_c2_g3;TRINITY_DN21306_c0_g2;TRINITY_DN22109_c2_g2;TRINITY_DN24161_c1_g2;TRINITY_DN24623_c1_g1;TRINITY_DN27928_c0_g1	K02128+K01535+K00420+K02270+K03938+K02258+K03943+K03963+K03951+K02136+K02126+K02259
Riboflavin metabolism	map00740	2	11	216	6668	TRINITY_DN23445_c1_g1;TRINITY_DN28329_c1_g1	K00861+K14410
Steroid biosynthesis	map00100	2	32	216	6668	TRINITY_DN25371_c0_g2;TRINITY_DN30059_c0_g2	K01052+K01052
Valine, leucine and isoleucine degradation	map00280	5	135	216	6668	TRINITY_DN18229_c0_g1;TRINITY_DN18570_c0_g1;TRINITY_DN24654_c1_g2;TRINITY_DN30820_c1_g1;TRINITY_DN30820_c1_g6	K08683+K08683+K13524+K00827+K00827
Ether lipid metabolism	map00565	1	27	216	6668	TRINITY_DN27219_c0_g1	K00993
Folate biosynthesis	map00790	12	94	216	6668	TRINITY_DN19971_c0_g2;TRINITY_DN20504_c4_g1;TRINITY_DN21327_c3_g3;TRINITY_DN23073_c2_g1;TRINITY_DN23073_c2_g3;TRINITY_DN23073_c3_g1;TRINITY_DN23171_c0_g1;TRINITY_DN24376_c1_g1;TRINITY_DN25897_c0_g1;TRINITY_DN25955_c1_g1;TRINITY_DN26943_c0_g3;TRINITY_DN27776_c0_g1	K00079+K00501+K00011+K00011+K00011+K00011+K01077+K00011+K00079+K00011+K00310+K00079
Pantothenate and CoA biosynthesis	map00770	1	17	216	6668	TRINITY_DN17169_c0_g1	K00207
Ribosome	map03010	5	465	216	6668	TRINITY_DN11863_c0_g2;TRINITY_DN13513_c0_g1;TRINITY_DN13679_c0_g1;TRINITY_DN13781_c0_g2;TRINITY_DN14443_c0_g1	K02962+K02984+K02874+K02940+K02914

## Sheet: Control vs SiO2.KEGG
#KEGG_n	744	KEGG_N	6668
#Pathway	ko_ID	DIFFgene	gene	DIFFgene_all	gene_all
Pentose and glucuronate interconversions	map00040	23	144	744	6668	TRINITY_DN15162_c0_g1;TRINITY_DN18609_c0_g1;TRINITY_DN21327_c3_g3;TRINITY_DN21398_c3_g2;TRINITY_DN21841_c0_g1;TRINITY_DN23073_c2_g1;TRINITY_DN23073_c2_g3;TRINITY_DN23073_c3_g1;TRINITY_DN24003_c1_g1;TRINITY_DN24026_c0_g2;TRINITY_DN24376_c1_g1;TRINITY_DN24376_c1_g5;TRINITY_DN24376_c1_g6;TRINITY_DN27716_c2_g1;TRINITY_DN28150_c1_g1;TRINITY_DN28819_c3_g1;TRINITY_DN31339_c4_g1;TRINITY_DN31339_c4_g2;TRI…	K00078+K00699+K00011+K00699+K00011+K00011+K00011+K00011+K00699+K00699+K00011+K00011+K00011+K00008+K00699+K00078+K00699+K00699+K00963+K00699+K00699+K00699+K00963
Glycosaminoglycan biosynthesis - heparan sulfate / heparin	map00534	1	18	744	6668	TRINITY_DN18138_c0_g1	K01793
Insect hormone biosynthesis	map00981	1	59	744	6668	TRINITY_DN18148_c0_g1	K10719
Salmonella infection	map05132	1	9	744	6668	TRINITY_DN20731_c0_g1	K05692
Tryptophan metabolism	map00380	2	87	744	6668	TRINITY_DN22288_c2_g2;TRINITY_DN24958_c0_g1	K00382+K03781
Neuroactive ligand-receptor interaction	map04080	3	134	744	6668	TRINITY_DN21262_c0_g3;TRINITY_DN22116_c1_g2;TRINITY_DN22116_c1_g3	K01312+K01312+K01312
Cellular senescence	map04218	1	10	744	6668	TRINITY_DN21384_c0_g1	K15041
FoxO signaling pathway	map04068	6	126	744	6668	TRINITY_DN14599_c0_g1;TRINITY_DN20036_c1_g1;TRINITY_DN20438_c3_g3;TRINITY_DN22337_c0_g1;TRINITY_DN23824_c1_g1;TRINITY_DN23824_c1_g2	K09385+K02206+K04456+K06631+K16172+K16172
Ubiquitin mediated proteolysis	map04120	4	172	744	6668	TRINITY_DN11459_c0_g1;TRINITY_DN14524_c0_g2;TRINITY_DN15165_c0_g1;TRINITY_DN15488_c0_g1	K10586+K06689+K06688+K10586
Dorso-ventral axis formation	map04320	3	59	744	6668	TRINITY_DN21186_c0_g2;TRINITY_DN23722_c0_g2;TRINITY_DN32049_c3_g1	K02360+K02098+K03102
Glycosaminoglycan degradation	map00531	2	27	744	6668	TRINITY_DN28245_c0_g1;TRINITY_DN28245_c0_g3	K12373+K12373
Caffeine metabolism	map00232	2	49	744	6668	TRINITY_DN15593_c0_g1;TRINITY_DN16434_c0_g1	K00106+K00106
Circadian rhythm - fly	map04711	3	15	744	6668	TRINITY_DN31502_c1_g1;TRINITY_DN31502_c1_g2;TRINITY_DN31942_c0_g1	K12074+K12074+K02633
Thiamine metabolism	map00730	2	22	744	6668	TRINITY_DN23171_c0_g1;TRINITY_DN27533_c0_g1	K01077+K14394
Focal adhesion	map04510	1	8	744	6668	TRINITY_DN20731_c0_g1	K05692
Nitrogen metabolism	map00910	3	26	744	6668	TRINITY_DN21412_c0_g3;TRINITY_DN21966_c0_g1;TRINITY_DN32148_c4_g1	K01915+K01672+K00264
Homologous recombination	map03440	2	52	744	6668	TRINITY_DN15460_c0_g1;TRINITY_DN18861_c0_g1	K19528+K10739
Glycosphingolipid biosynthesis - ganglio series	map00604	2	13	744	6668	TRINITY_DN28245_c0_g1;TRINITY_DN28245_c0_g3	K12373+K12373
Amino sugar and nucleotide sugar metabolism	map00520	26	113	744	6668	TRINITY_DN20120_c3_g1;TRINITY_DN22150_c0_g2;TRINITY_DN22930_c0_g1;TRINITY_DN25626_c0_g1;TRINITY_DN28245_c0_g1;TRINITY_DN28245_c0_g3;TRINITY_DN28679_c1_g2;TRINITY_DN29585_c0_g1;TRINITY_DN30012_c0_g1;TRINITY_DN30152_c1_g1;TRINITY_DN30237_c2_g1;TRINITY_DN31065_c0_g2;TRINITY_DN31621_c1_g1;TRINITY_DN31835_c2_g1;TRINITY_DN32176_c7_g1;TRINITY_DN8737_c0_g1;TRINITY_DN11055_c0_g1;TRINITY_DN11221_c0_g1;TRIN…	K02564+K01443+K01183+K00698+K12373+K12373+K00972+K00820+K00698+K01183+K00621+K01097+K01183+K00844+K01183+K00963+K00972+K01784+K01183+K01784+K01183+K01183+K00326+K02377+K05304+K00965
Apoptosis - fly	map04214	3	114	744	6668	TRINITY_DN11459_c0_g1;TRINITY_DN15488_c0_g1;TRINITY_DN17077_c0_g1	K10586+K10586+K04727
Sulfur relay system	map04122	1	9	744	6668	TRINITY_DN17320_c0_g1	K12161
HIF-1 signaling pathway	map04066	1	5	744	6668	TRINITY_DN12841_c0_g1	K00927
Wnt signaling pathway	map04310	2	131	744	6668	TRINITY_DN12409_c0_g1;TRINITY_DN19471_c0_g1	K04512+K04512
Taurine and hypotaurine metabolism	map00430	1	6	744	6668	TRINITY_DN19257_c3_g4	K00456
Selenocompound metabolism	map00450	1	21	744	6668	TRINITY_DN28109_c0_g1	K01758
Pantothenate and CoA biosynthesis	map00770	3	17	744	6668	TRINITY_DN21315_c3_g1;TRINITY_DN22677_c0_g1;TRINITY_DN28438_c0_g2	K08069+K01431+K06133
Oxidative phosphorylation	map00190	21	279	744	6668	TRINITY_DN12251_c0_g1;TRINITY_DN13550_c0_g1;TRINITY_DN16864_c0_g1;TRINITY_DN17712_c0_g1;TRINITY_DN17877_c0_g1;TRINITY_DN18172_c0_g2;TRINITY_DN18341_c0_g1;TRINITY_DN18488_c0_g1;TRINITY_DN18904_c0_g1;TRINITY_DN19180_c0_g1;TRINITY_DN19249_c1_g3;TRINITY_DN19314_c0_g1;TRINITY_DN21306_c0_g2;TRINITY_DN21715_c1_g2;TRINITY_DN22004_c1_g2;TRINITY_DN24161_c1_g2;TRINITY_DN24623_c1_g1;TRINITY_DN26603_c7_g2;TRI…	K02128+K02136+K11726+K02273+K01535+K11351+K00420+K03955+K02270+K02133+K03938+K02258+K03963+K02256+K02132+K02136+K02126+K02145+K02259+K03934+K02134
Ubiquinone and other terpenoid-quinone biosynthesis	map00130	5	26	744	6668	TRINITY_DN25145_c1_g1;TRINITY_DN25145_c1_g2;TRINITY_DN25997_c0_g1;TRINITY_DN26522_c1_g2;TRINITY_DN30579_c1_g2	K00457+K00457+K06126+K00457+K00815
Glycolysis / Gluconeogenesis	map00010	21	156	744	6668	TRINITY_DN12841_c0_g1;TRINITY_DN14000_c0_g1;TRINITY_DN16084_c0_g2;TRINITY_DN17008_c0_g1;TRINITY_DN21212_c0_g1;TRINITY_DN21992_c1_g1;TRINITY_DN22288_c2_g2;TRINITY_DN24960_c0_g1;TRINITY_DN27835_c0_g1;TRINITY_DN29466_c3_g1;TRINITY_DN29466_c3_g2;TRINITY_DN30194_c0_g1;TRINITY_DN31835_c2_g1;TRINITY_DN8703_c0_g1;TRINITY_DN11206_c0_g1;TRINITY_DN23634_c1_g1;TRINITY_DN25502_c0_g1;TRINITY_DN26777_c1_g1;TRIN…	K00927+K00121+K01624+K00873+K01785+K03103+K00382+K00627+K03103+K01596+K01596+K01895+K00844+K00382+K00844+K00128+K01834+K00128+K15779+K00844+K00002
Glycosylphosphatidylinositol (GPI)-anchor biosynthesis	map00563	5	30	744	6668	TRINITY_DN19090_c0_g1;TRINITY_DN22063_c0_g1;TRINITY_DN23404_c0_g1;TRINITY_DN23655_c0_g1;TRINITY_DN25368_c0_g1	K05287+K05292+K05288+K05288+K05284
One carbon pool by folate	map00670	3	39	744	6668	TRINITY_DN16916_c0_g1;TRINITY_DN27407_c0_g1;TRINITY_DN27580_c0_g1	K00600+K00287+K13403
Arginine biosynthesis	map00220	4	65	744	6668	TRINITY_DN21412_c0_g3;TRINITY_DN21987_c0_g1;TRINITY_DN24881_c0_g1;TRINITY_DN24881_c0_g2	K01915+K14677+K01940+K01940
Glycosphingolipid biosynthesis - globo and isoglobo series	map00603	4	23	744	6668	TRINITY_DN25396_c2_g2;TRINITY_DN28245_c0_g1;TRINITY_DN28245_c0_g3;TRINITY_DN29563_c2_g1	K01189+K12373+K12373+K01204
Apoptosis - multiple species	map04215	6	39	744	6668	TRINITY_DN11459_c0_g1;TRINITY_DN15488_c0_g1;TRINITY_DN18305_c0_g1;TRINITY_DN20098_c5_g3;TRINITY_DN27810_c1_g1;TRINITY_DN31795_c0_g3	K10586+K10586+K08731+K04397+K08669+K16061
Insulin signaling pathway	map04910	2	13	744	6668	TRINITY_DN20438_c3_g1;TRINITY_DN24222_c6_g4	K02991+K15909
Mismatch repair	map03430	2	28	744	6668	TRINITY_DN18861_c0_g1;TRINITY_DN20301_c0_g1	K10739+K10747
Fructose and mannose metabolism	map00051	21	97	744	6668	TRINITY_DN16084_c0_g2;TRINITY_DN21327_c3_g3;TRINITY_DN21841_c0_g1;TRINITY_DN23073_c2_g1;TRINITY_DN23073_c2_g3;TRINITY_DN23073_c3_g1;TRINITY_DN24376_c1_g1;TRINITY_DN24376_c1_g5;TRINITY_DN24376_c1_g6;TRINITY_DN27716_c2_g1;TRINITY_DN31835_c2_g1;TRINITY_DN11177_c0_g1;TRINITY_DN12031_c0_g1;TRINITY_DN18446_c0_g1;TRINITY_DN20897_c0_g2;TRINITY_DN2873_c0_g1;TRINITY_DN29636_c2_g1;TRINITY_DN32025_c3_g1;TRIN…	K01624+K00011+K00011+K00011+K00011+K00011+K00011+K00011+K00011+K00008+K00844+K00011+K01803+K00011+K01803+K19028+K01809+K00844+K00011+K01809+K00850
Riboflavin metabolism	map00740	2	11	744	6668	TRINITY_DN23445_c1_g1;TRINITY_DN27533_c0_g1	K00861+K14394
Basal transcription factors	map03022	3	47	744	6668	TRINITY_DN21283_c0_g1;TRINITY_DN23071_c2_g1;TRINITY_DN28758_c0_g1	K02202+K03123+K03132
RNA transport	map03013	3	272	744	6668	TRINITY_DN17198_c0_g1;TRINITY_DN17922_c0_g1;TRINITY_DN18377_c0_g1	K03238+K12879+K05749
Endocytosis	map04144	2	218	744	6668	TRINITY_DN14183_c0_g1;TRINITY_DN22662_c0_g1	K07937+K03283
NOD-like receptor signaling pathway	map04621	2	16	744	6668	TRINITY_DN21384_c0_g1;TRINITY_DN24759_c0_g3	K15041+K06630
Lipoic acid metabolism	map00785	1	3	744	6668	TRINITY_DN30452_c3_g1	K10105
Alanine, aspartate and glutamate metabolism	map00250	2	97	744	6668	TRINITY_DN17997_c0_g1;TRINITY_DN21412_c0_g3	K00294+K01915
D-Arginine and D-ornithine metabolism	map00472	1	1	744	6668	TRINITY_DN27867_c2_g1	K00273
Lysosome	map04142	5	233	744	6668	TRINITY_DN17543_c0_g1;TRINITY_DN19933_c0_g1;TRINITY_DN22946_c2_g2;TRINITY_DN23034_c3_g1;TRINITY_DN25371_c0_g2	K12396+K01052+K19363+K06546+K01052
Mucin type O-glycan biosynthesis	map00512	2	18	744	6668	TRINITY_DN15388_c0_g1;TRINITY_DN29240_c0_g2	K00710+K00710
Metabolic pathways	map04810	95	2827	744	6668	TRINITY_DN11206_c0_g1;TRINITY_DN12079_c0_g1;TRINITY_DN12114_c0_g1;TRINITY_DN13460_c0_g1;TRINITY_DN13688_c0_g1;TRINITY_DN14862_c0_g1;TRINITY_DN15530_c0_g1;TRINITY_DN1856_c0_g1;TRINITY_DN20948_c10_g1;TRINITY_DN21591_c0_g1;TRINITY_DN21992_c1_g1;TRINITY_DN22288_c2_g2;TRINITY_DN22472_c2_g2;TRINITY_DN23907_c0_g1;TRINITY_DN25502_c0_g1;TRINITY_DN27835_c0_g1;TRINITY_DN27987_c0_g1;TRINITY_DN28108_c0_g1;TRI…	K00844+K01895+K00002+K00016+K00873+K00627+K00134+K00627+K01596+K08074+K03103+K00382+K00927+K03103+K01834+K03103+K00161+K00128+K00850+K00850+K01810+K01895+K14085+K14085+K00844+K00844+K15633+K00121+K00850+K15633+K00162+K00162+K00002+K03841+K00164+K00164+K00026+K01899+K00026+K00030+K00031+K00026+K00164+K00235+K01958+K00030+K01958+K01900+K01681+K00658+K00234+K00026+K00031+K01648+K00030+K00026+K00236+…
Protein export	map03060	4	39	744	6668	TRINITY_DN19798_c0_g1;TRINITY_DN20464_c2_g1;TRINITY_DN21645_c0_g1;TRINITY_DN22017_c5_g1	K03217+K12946+K09481+K03105
RNA polymerase	map03020	3	58	744	6668	TRINITY_DN11997_c0_g1;TRINITY_DN15916_c0_g1;TRINITY_DN19056_c0_g1	K03027+K03016+K03000
Glycerophospholipid metabolism	map00564	20	117	744	6668	TRINITY_DN13541_c0_g1;TRINITY_DN18029_c0_g1;TRINITY_DN19588_c0_g1;TRINITY_DN21554_c0_g1;TRINITY_DN21574_c0_g1;TRINITY_DN22193_c4_g1;TRINITY_DN23668_c0_g1;TRINITY_DN24831_c2_g3;TRINITY_DN25985_c0_g1;TRINITY_DN26277_c1_g1;TRINITY_DN27219_c0_g1;TRINITY_DN28006_c0_g1;TRINITY_DN28083_c0_g1;TRINITY_DN28805_c0_g1;TRINITY_DN29840_c0_g3;TRINITY_DN30479_c0_g1;TRINITY_DN30742_c0_g1;TRINITY_DN311_c0_g1;TRINI…	K00006+K00006+K00901+K15728+K01049+K01047+K01047+K00993+K14621+K01047+K00993+K01049+K01049+K16860+K00999+K14286+K08729+K01115+K13509+K00006
Amoebiasis	map05146	1	12	744	6668	TRINITY_DN32555_c0_g1	K10955
Glutathione metabolism	map00480	20	143	744	6668	TRINITY_DN13351_c1_g1;TRINITY_DN1931_c0_g1;TRINITY_DN21366_c0_g1;TRINITY_DN23267_c1_g1;TRINITY_DN23759_c0_g4;TRINITY_DN26943_c0_g3;TRINITY_DN27076_c0_g1;TRINITY_DN27469_c0_g2;TRINITY_DN29519_c8_g1;TRINITY_DN29519_c8_g3;TRINITY_DN30691_c0_g1;TRINITY_DN30905_c0_g1;TRINITY_DN30905_c0_g2;TRINITY_DN14856_c0_g1;TRINITY_DN17128_c0_g1;TRINITY_DN18210_c0_g1;TRINITY_DN19852_c0_g1;TRINITY_DN20449_c2_g3;TRIN…	K00797+K00031+K00799+K00799+K00799+K00310+K11140+K11140+K11140+K11140+K00802+K10808+K10808+K05361+K04097+K00799+K00682+K04097+K21456+K10807
Cell cycle	map04110	1	7	744	6668	TRINITY_DN24759_c0_g3	K06630
Phagosome	map04145	4	194	744	6668	TRINITY_DN18957_c1_g6;TRINITY_DN19420_c0_g1;TRINITY_DN20731_c0_g1;TRINITY_DN21645_c0_g1	K07374+K04659+K05692+K09481
Glycine, serine and threonine metabolism	map00260	21	103	744	6668	TRINITY_DN10702_c1_g1;TRINITY_DN16916_c0_g1;TRINITY_DN21143_c0_g1;TRINITY_DN21947_c3_g1;TRINITY_DN22288_c2_g2;TRINITY_DN26147_c0_g4;TRINITY_DN27867_c2_g1;TRINITY_DN28001_c1_g1;TRINITY_DN28109_c0_g1;TRINITY_DN28588_c1_g1;TRINITY_DN28588_c1_g2;TRINITY_DN29944_c0_g1;TRINITY_DN30820_c1_g1;TRINITY_DN30820_c1_g6;TRINITY_DN8703_c0_g1;TRINITY_DN11444_c0_g1;TRINITY_DN20412_c0_g1;TRINITY_DN23077_c0_g3;TRIN…	K00049+K00600+K00108+K00058+K00382+K00049+K00273+K00108+K01758+K00600+K00600+K00108+K00827+K00827+K00382+K01834+K00639+K15789+K00552+K00049+K00552
Base excision repair	map03410	3	38	744	6668	TRINITY_DN14229_c0_g1;TRINITY_DN20301_c0_g1;TRINITY_DN26164_c1_g1	K02326+K10747+K02328
Autophagy - other	map04136	2	53	744	6668	TRINITY_DN24807_c0_g1;TRINITY_DN28449_c0_g1	K08333+K17606
Ribosome	map03010	7	465	744	6668	TRINITY_DN11863_c0_g2;TRINITY_DN11976_c0_g2;TRINITY_DN11980_c0_g1;TRINITY_DN12094_c0_g1;TRINITY_DN12206_c0_g2;TRINITY_DN12795_c0_g2;TRINITY_DN12882_c0_g1	K02962+K02993+K02978+K02985+K02873+K02921+K02923
Apoptosis	map04210	1	19	744	6668	TRINITY_DN20731_c0_g1	K05692
Lysine degradation	map00310	9	138	744	6668	TRINITY_DN17538_c0_g1;TRINITY_DN17544_c0_g1;TRINITY_DN20191_c2_g2;TRINITY_DN22288_c2_g2;TRINITY_DN24018_c1_g1;TRINITY_DN30368_c0_g1;TRINITY_DN30440_c1_g1;TRINITY_DN32571_c0_g1;TRINITY_DN8703_c0_g1	K11420+K09188+K20796+K00382+K13647+K14157+K19199+K00658+K00382
AGE-RAGE signaling pathway in diabetic complications	map04933	1	70	744	6668	TRINITY_DN20438_c3_g3	K04456
PPAR signaling pathway	map03320	1	22	744	6668	TRINITY_DN27627_c0_g2	K01059
Phototransduction - fly	map04745	3	50	744	6668	TRINITY_DN24470_c1_g1;TRINITY_DN24557_c0_g1;TRINITY_DN28463_c0_g1	K05692+K13805+K13807
ABC transporters	map02010	2	81	744	6668	TRINITY_DN30458_c0_g1;TRINITY_DN31847_c2_g1	K05655+K05648
Tight junction	map04530	1	13	744	6668	TRINITY_DN20731_c0_g1	K05692
alpha-Linolenic acid metabolism	map00592	4	43	744	6668	TRINITY_DN22193_c4_g1;TRINITY_DN25985_c0_g1;TRINITY_DN26277_c1_g1;TRINITY_DN27846_c5_g1	K01047+K14621+K01047+K00232
Non-homologous end-joining	map03450	1	12	744	6668	TRINITY_DN31089_c0_g1	K04799
Galactose metabolism	map00052	2	102	744	6668	TRINITY_DN21212_c0_g1;TRINITY_DN21327_c3_g3	K01785+K00011
Cholesterol metabolism	map04979	1	4	744	6668	TRINITY_DN4257_c0_g1	K13050
Pentose phosphate pathway	map00030	4	72	744	6668	TRINITY_DN13727_c0_g1;TRINITY_DN16084_c0_g2;TRINITY_DN28608_c0_g1;TRINITY_DN29064_c0_g1	K00616+K01624+K00115+K00115
Valine, leucine and isoleucine degradation	map00280	28	135	744	6668	TRINITY_DN18229_c0_g1;TRINITY_DN18570_c0_g1;TRINITY_DN22288_c2_g2;TRINITY_DN24654_c1_g2;TRINITY_DN24666_c0_g1;TRINITY_DN24929_c1_g2;TRINITY_DN24929_c1_g3;TRINITY_DN26000_c3_g2;TRINITY_DN30209_c4_g3;TRINITY_DN30820_c1_g1;TRINITY_DN30820_c1_g6;TRINITY_DN32154_c5_g3;TRINITY_DN8703_c0_g1;TRINITY_DN10012_c0_g1;TRINITY_DN11266_c0_g1;TRINITY_DN18353_c7_g1;TRINITY_DN20029_c2_g1;TRINITY_DN20954_c3_g1;TRIN…	K08683+K08683+K00382+K13524+K01641+K07508+K07508+K00249+K00020+K00827+K00827+K00140+K00382+K13524+K07511+K00827+K01027+K00253+K00827+K07508+K00128+K00128+K00128+K07508+K00626+K00128+K07513+K00626
Spliceosome	map03040	3	234	744	6668	TRINITY_DN12067_c0_g1;TRINITY_DN13938_c0_g1;TRINITY_DN15382_c0_g1	K12621+K12832+K11097
Inositol phosphate metabolism	map00562	7	107	744	6668	TRINITY_DN21992_c1_g1;TRINITY_DN23746_c0_g1;TRINITY_DN24222_c6_g4;TRINITY_DN27835_c0_g1;TRINITY_DN29411_c1_g1;TRINITY_DN32154_c5_g3;TRINITY_DN9301_c0_g1	K03103+K00469+K15909+K03103+K00921+K00140+K01858
Toll and Imd signaling pathway	map04624	2	85	744	6668	TRINITY_DN14826_c0_g1;TRINITY_DN16452_c0_g1	K10380+K13411
Synthesis and degradation of ketone bodies	map00072	1	18	744	6668	TRINITY_DN24666_c0_g1	K01641
Pyrimidine metabolism	map00240	4	80	744	6668	TRINITY_DN17911_c0_g1;TRINITY_DN22066_c1_g2;TRINITY_DN22677_c0_g1;TRINITY_DN22725_c0_g2	K01489+K01081+K01431+K01493
Butanoate metabolism	map00650	2	35	744	6668	TRINITY_DN24654_c1_g2;TRINITY_DN24666_c0_g1	K13524+K01641
Terpenoid backbone biosynthesis	map00900	1	54	744	6668	TRINITY_DN15029_c0_g1	K19177
Glycerolipid metabolism	map00561	21	150	744	6668	TRINITY_DN21327_c3_g3;TRINITY_DN21554_c0_g1;TRINITY_DN21841_c0_g1;TRINITY_DN22342_c1_g1;TRINITY_DN23073_c2_g1;TRINITY_DN23073_c2_g3;TRINITY_DN23073_c3_g1;TRINITY_DN24376_c1_g1;TRINITY_DN24376_c1_g5;TRINITY_DN24376_c1_g6;TRINITY_DN25396_c2_g2;TRINITY_DN27627_c0_g2;TRINITY_DN28011_c2_g1;TRINITY_DN28232_c3_g5;TRINITY_DN28482_c0_g2;TRINITY_DN32007_c1_g2;TRINITY_DN12114_c0_g1;TRINITY_DN19588_c0_g1;TRI…	K00011+K15728+K00011+K14073+K00011+K00011+K00011+K00011+K00011+K00011+K01189+K01059+K09881+K14073+K00864+K14073+K00002+K00901+K00128+K01080+K13509
Various types of N-glycan biosynthesis	map00513	7	63	744	6668	TRINITY_DN17854_c0_g1;TRINITY_DN22461_c1_g2;TRINITY_DN24213_c2_g1;TRINITY_DN28245_c0_g1;TRINITY_DN28245_c0_g3;TRINITY_DN29940_c0_g1;TRINITY_DN31833_c4_g1	K12667+K12669+K12670+K12373+K12373+K14464+K01231
Porphyrin and chlorophyll metabolism	map00860	3	105	744	6668	TRINITY_DN18609_c0_g1;TRINITY_DN19280_c0_g1;TRINITY_DN19293_c0_g1	K00699+K01885+K19054
D-Glutamine and D-glutamate metabolism	map00471	1	6	744	6668	TRINITY_DN27619_c3_g1	K01425
DNA replication	map03030	1	56	744	6668	TRINITY_DN14229_c0_g1	K02326
Fatty acid degradation	map00071	5	133	744	6668	TRINITY_DN14000_c0_g1;TRINITY_DN24929_c1_g2;TRINITY_DN24929_c1_g3;TRINITY_DN26000_c3_g2;TRINITY_DN27846_c5_g1	K00121+K07508+K07508+K00249+K00232
Peroxisome	map04146	36	275	744	6668	TRINITY_DN13181_c0_g1;TRINITY_DN13586_c0_g1;TRINITY_DN15593_c0_g1;TRINITY_DN16434_c0_g1;TRINITY_DN16780_c0_g1;TRINITY_DN16832_c0_g1;TRINITY_DN16907_c0_g1;TRINITY_DN18199_c0_g1;TRINITY_DN18239_c0_g1;TRINITY_DN18260_c0_g1;TRINITY_DN18994_c0_g2;TRINITY_DN1931_c0_g1;TRINITY_DN19586_c0_g1;TRINITY_DN20897_c0_g1;TRINITY_DN21719_c1_g1;TRINITY_DN22488_c0_g1;TRINITY_DN23199_c2_g2;TRINITY_DN24655_c2_g1;TRIN…	K11187+K04565+K00106+K00106+K00477+K00106+K00106+K13356+K13336+K13348+K11187+K00031+K00477+K13356+K13356+K13348+K13349+K13356+K00106+K03781+K13356+K12405+K13356+K00232+K00273+K00477+K04565+K04565+K00803+K13356+K13356+K13356+K00106+K00106+K00106+K00106
Other glycan degradation	map00511	3	48	744	6668	TRINITY_DN22890_c0_g1;TRINITY_DN26283_c2_g1;TRINITY_DN28245_c0_g1	K01206+K01201+K12373
Starch and sucrose metabolism	map00500	4	82	744	6668	TRINITY_DN14197_c0_g1;TRINITY_DN16950_c0_g1;TRINITY_DN21320_c1_g2;TRINITY_DN21320_c1_g3	K01196+K00750+K01176+K01176
Arachidonic acid metabolism	map00590	3	56	744	6668	TRINITY_DN18216_c0_g1;TRINITY_DN18921_c0_g1;TRINITY_DN19971_c0_g2	K15730+K15730+K00079
Nucleotide excision repair	map03420	2	60	744	6668	TRINITY_DN14229_c0_g1;TRINITY_DN18861_c0_g1	K02326+K10739
Pyruvate metabolism	map00620	3	133	744	6668	TRINITY_DN10702_c1_g1;TRINITY_DN12897_c1_g1;TRINITY_DN13272_c0_g1	K00049+K00026+K00026
Drug metabolism - other enzymes	map00983	31	198	744	6668	TRINITY_DN13547_c0_g1;TRINITY_DN15593_c0_g1;TRINITY_DN16434_c0_g1;TRINITY_DN16832_c0_g1;TRINITY_DN16907_c0_g1;TRINITY_DN17911_c0_g1;TRINITY_DN18609_c0_g1;TRINITY_DN19467_c0_g1;TRINITY_DN21366_c0_g1;TRINITY_DN21398_c3_g2;TRINITY_DN22677_c0_g1;TRINITY_DN23267_c1_g1;TRINITY_DN23759_c0_g4;TRINITY_DN23950_c0_g1;TRINITY_DN24003_c1_g1;TRINITY_DN24026_c0_g2;TRINITY_DN24896_c1_g2;TRINITY_DN25326_c2_g1;TRI…	K00088+K00106+K00106+K00106+K00106+K01489+K00699+K01519+K00799+K00699+K01431+K00799+K00799+K13421+K00699+K00699+K00106+K01520+K13800+K00699+K01044+K00757+K10808+K10808+K00699+K00699+K00106+K00106+K00106+K00106+K00940
Steroid biosynthesis	map00100	4	32	744	6668	TRINITY_DN19933_c0_g1;TRINITY_DN25371_c0_g2;TRINITY_DN30059_c0_g1;TRINITY_DN30059_c0_g2	K01052+K01052+K01052+K01052
Apelin signaling pathway	map04371	1	6	744	6668	TRINITY_DN20438_c3_g1	K02991
Fatty acid biosynthesis	map00061	5	85	744	6668	TRINITY_DN13186_c0_g1;TRINITY_DN14464_c0_g1;TRINITY_DN18488_c0_g1;TRINITY_DN24170_c2_g4;TRINITY_DN29823_c0_g1	K00665+K00665+K03955+K00665+K00665
Ether lipid metabolism	map00565	6	27	744	6668	TRINITY_DN22193_c4_g1;TRINITY_DN24831_c2_g3;TRINITY_DN25985_c0_g1;TRINITY_DN26277_c1_g1;TRINITY_DN27219_c0_g1;TRINITY_DN29531_c0_g1	K01047+K00993+K14621+K01047+K00993+K00803
Necroptosis	map04217	2	13	744	6668	TRINITY_DN11925_c0_g2;TRINITY_DN21384_c0_g1	K11251+K15041
Citrate cycle (TCA cycle)	map00020	2	127	744	6668	TRINITY_DN12090_c0_g2;TRINITY_DN12897_c1_g1	K01900+K00026
N-Glycan biosynthesis	map00510	3	57	744	6668	TRINITY_DN17854_c0_g1;TRINITY_DN20959_c0_g1;TRINITY_DN22461_c1_g2	K12667+K12345+K12669
Notch signaling pathway	map04330	2	52	744	6668	TRINITY_DN13215_c0_g1;TRINITY_DN14452_c0_g1	K23616+K23616
Hippo signaling pathway - fly	map04391	5	121	744	6668	TRINITY_DN16393_c0_g3;TRINITY_DN24470_c1_g1;TRINITY_DN26813_c1_g2;TRINITY_DN29993_c1_g1;TRINITY_DN31451_c0_g1	K16673+K05692+K16690+K05692+K16669
Retinol metabolism	map00830	3	96	744	6668	TRINITY_DN14000_c0_g1;TRINITY_DN18609_c0_g1;TRINITY_DN21398_c3_g2	K00121+K00699+K00699
Folate biosynthesis	map00790	5	94	744	6668	TRINITY_DN19971_c0_g2;TRINITY_DN20504_c4_g1;TRINITY_DN20872_c0_g1;TRINITY_DN21327_c3_g3;TRINITY_DN21841_c0_g1	K00079+K00501+K00357+K00011+K00011
Biosynthesis of unsaturated fatty acids	map01040	6	98	744	6668	TRINITY_DN22734_c1_g3;TRINITY_DN22752_c1_g1;TRINITY_DN23944_c0_g1;TRINITY_DN27376_c3_g5;TRINITY_DN27846_c5_g1;TRINITY_DN29126_c0_g2	K10250+K10249+K00507+K12405+K00232+K00507
Metabolism of xenobiotics by cytochrome P450	map00980	21	144	744	6668	TRINITY_DN14000_c0_g1;TRINITY_DN15162_c0_g1;TRINITY_DN18609_c0_g1;TRINITY_DN19971_c0_g2;TRINITY_DN21366_c0_g1;TRINITY_DN21398_c3_g2;TRINITY_DN23267_c1_g1;TRINITY_DN23759_c0_g4;TRINITY_DN24003_c1_g1;TRINITY_DN24026_c0_g2;TRINITY_DN25897_c0_g1;TRINITY_DN27776_c0_g1;TRINITY_DN28150_c1_g1;TRINITY_DN28819_c3_g1;TRINITY_DN31339_c4_g1;TRINITY_DN31339_c4_g2;TRINITY_DN19251_c0_g1;TRINITY_DN20438_c2_g1;TRI…	K00121+K00078+K00699+K00079+K00799+K00699+K00799+K00799+K00699+K00699+K00079+K00079+K00699+K00078+K00699+K00699+K00799+K00699+K00799+K00699+K00699
Propanoate metabolism	map00640	5	86	744	6668	TRINITY_DN12090_c0_g2;TRINITY_DN22288_c2_g2;TRINITY_DN24654_c1_g2;TRINITY_DN27295_c0_g1;TRINITY_DN27846_c5_g1	K01900+K00382+K13524+K01900+K00232
Linoleic acid metabolism	map00591	2	7	744	6668	TRINITY_DN22193_c4_g1;TRINITY_DN26277_c1_g1	K01047+K01047
Arginine and proline metabolism	map00330	7	91	744	6668	TRINITY_DN13351_c1_g1;TRINITY_DN17997_c0_g1;TRINITY_DN21667_c0_g2;TRINITY_DN27867_c2_g1;TRINITY_DN30691_c0_g1;TRINITY_DN31186_c1_g1;TRINITY_DN31263_c1_g1	K00797+K00294+K00286+K00273+K00802+K13240+K00318
beta-Alanine metabolism	map00410	7	94	744	6668	TRINITY_DN13351_c1_g1;TRINITY_DN22677_c0_g1;TRINITY_DN24654_c1_g2;TRINITY_DN27846_c5_g1;TRINITY_DN30209_c4_g3;TRINITY_DN30691_c0_g1;TRINITY_DN32154_c5_g3	K00797+K01431+K13524+K00232+K00020+K00802+K00140
Phenylalanine, tyrosine and tryptophan biosynthesis	map00400	1	13	744	6668	TRINITY_DN30579_c1_g2	K00815
Ribosome biogenesis in eukaryotes	map03008	2	146	744	6668	TRINITY_DN17486_c0_g1;TRINITY_DN17840_c0_g1	K14566+K12845
Longevity regulating pathway - multiple species	map04213	2	132	744	6668	TRINITY_DN13586_c0_g1;TRINITY_DN17275_c0_g1	K04565+K09542
Protein processing in endoplasmic reticulum	map04141	28	271	744	6668	TRINITY_DN14524_c0_g2;TRINITY_DN17275_c0_g1;TRINITY_DN17854_c0_g1;TRINITY_DN18706_c0_g2;TRINITY_DN19731_c0_g1;TRINITY_DN20011_c0_g1;TRINITY_DN21091_c3_g4;TRINITY_DN21324_c0_g1;TRINITY_DN21645_c0_g1;TRINITY_DN21673_c0_g2;TRINITY_DN22039_c0_g1;TRINITY_DN22461_c1_g2;TRINITY_DN22662_c0_g1;TRINITY_DN22834_c0_g1;TRINITY_DN24111_c0_g1;TRINITY_DN24213_c2_g1;TRINITY_DN24707_c0_g1;TRINITY_DN24707_c0_g2;TRI…	K06689+K09542+K12667+K10597+K14004+K09542+K13250+K09542+K09481+K14015+K04374+K12669+K03283+K14026+K03283+K12670+K09542+K09542+K04571+K03283+K03283+K08653+K04374+K09541+K08054+K08054+K10080+K03283
mRNA surveillance pathway	map03015	3	130	744	6668	TRINITY_DN18708_c0_g1;TRINITY_DN26985_c1_g3;TRINITY_DN28650_c0_g1	K12877+K06269+K11584
Glyoxylate and dicarboxylate metabolism	map00630	15	98	744	6668	TRINITY_DN10702_c1_g1;TRINITY_DN12897_c1_g1;TRINITY_DN13272_c0_g1;TRINITY_DN15443_c0_g1;TRINITY_DN16916_c0_g1;TRINITY_DN21412_c0_g3;TRINITY_DN22288_c2_g2;TRINITY_DN24958_c0_g1;TRINITY_DN26147_c0_g4;TRINITY_DN28588_c1_g1;TRINITY_DN28588_c1_g2;TRINITY_DN30194_c0_g1;TRINITY_DN8703_c0_g1;TRINITY_DN27489_c1_g4;TRINITY_DN33236_c0_g1	K00049+K00026+K00026+K01647+K00600+K01915+K00382+K03781+K00049+K00600+K00600+K01895+K00382+K03781+K03781
MAPK signaling pathway	map04010	1	7	744	6668	TRINITY_DN7660_c0_g2	K03283
Calcium signaling pathway	map04020	1	10	744	6668	TRINITY_DN21384_c0_g1	K15041
Gastric cancer	map05226	1	11	744	6668	TRINITY_DN32555_c0_g1	K10955
Hippo signaling pathway - multiple species	map04392	1	39	744	6668	TRINITY_DN31451_c0_g1	K16669
Sphingolipid metabolism	map00600	3	51	744	6668	TRINITY_DN19332_c7_g1;TRINITY_DN25396_c2_g2;TRINITY_DN26283_c2_g1	K00654+K01189+K01201
Fanconi anemia pathway	map03460	5	54	744	6668	TRINITY_DN18861_c0_g1;TRINITY_DN20305_c0_g1;TRINITY_DN20403_c0_g2;TRINITY_DN29251_c0_g1;TRINITY_DN30114_c0_g1	K10739+K10740+K15365+K07466+K10858
Mitophagy - animal	map04137	4	68	744	6668	TRINITY_DN22039_c0_g1;TRINITY_DN26153_c2_g1;TRINITY_DN29250_c1_g1;TRINITY_DN30176_c0_g1	K04374+K15464+K04374+K20168
Other types of O-glycan biosynthesis	map00514	1	20	744	6668	TRINITY_DN31684_c2_g2	K13676
Ascorbate and aldarate metabolism	map00053	8	120	744	6668	TRINITY_DN18609_c0_g1;TRINITY_DN21398_c3_g2;TRINITY_DN23746_c0_g1;TRINITY_DN24003_c1_g1;TRINITY_DN24026_c0_g2;TRINITY_DN28150_c1_g1;TRINITY_DN31339_c4_g1;TRINITY_DN31339_c4_g2	K00699+K00699+K00469+K00699+K00699+K00699+K00699+K00699
Phosphatidylinositol signaling system	map04070	4	109	744	6668	TRINITY_DN19240_c0_g1;TRINITY_DN24222_c6_g4;TRINITY_DN29411_c1_g1;TRINITY_DN31400_c1_g2	K07756+K15909+K00921+K04958
MAPK signaling pathway - fly	map04013	18	170	744	6668	TRINITY_DN13912_c0_g1;TRINITY_DN16452_c0_g1;TRINITY_DN18441_c0_g1;TRINITY_DN18789_c0_g1;TRINITY_DN21464_c0_g1;TRINITY_DN21619_c4_g1;TRINITY_DN21847_c0_g1;TRINITY_DN23251_c3_g1;TRINITY_DN24502_c0_g1;TRINITY_DN26813_c1_g2;TRINITY_DN28480_c2_g3;TRINITY_DN29333_c0_g1;TRINITY_DN31855_c3_g1;TRINITY_DN32112_c1_g1;TRINITY_DN15544_c0_g2;TRINITY_DN19878_c0_g1;TRINITY_DN25799_c0_g2;TRINITY_DN27925_c1_g1	K17536+K13411+K20235+K20235+K12377+K12377+K20235+K12378+K09031+K16690+K12377+K05088+K13411+K04428+K17512+K04417+K20223+K03175
Phosphonate and phosphinate metabolism	map00440	2	10	744	6668	TRINITY_DN24831_c2_g3;TRINITY_DN27219_c0_g1	K00993+K00993
Hedgehog signaling pathway - fly	map04341	1	44	744	6668	TRINITY_DN21310_c0_g2	K08957
Sulfur metabolism	map00920	1	24	744	6668	TRINITY_DN33155_c0_g1	K00387
Tyrosine metabolism	map00350	11	52	744	6668	TRINITY_DN14000_c0_g1;TRINITY_DN19627_c0_g1;TRINITY_DN20504_c4_g1;TRINITY_DN24385_c2_g1;TRINITY_DN25145_c1_g1;TRINITY_DN25145_c1_g2;TRINITY_DN25857_c1_g1;TRINITY_DN25857_c1_g3;TRINITY_DN26522_c1_g2;TRINITY_DN29475_c1_g2;TRINITY_DN30579_c1_g2	K00121+K22329+K00501+K01555+K00457+K00457+K00451+K00451+K00457+K01593+K00815
Aminoacyl-tRNA biosynthesis	map00970	5	92	744	6668	TRINITY_DN19280_c0_g1;TRINITY_DN25199_c0_g1;TRINITY_DN25621_c0_g1;TRINITY_DN25773_c0_g1;TRINITY_DN26055_c0_g1	K01885+K01876+K02433+K01875+K01880
Adherens junction	map04520	1	6	744	6668	TRINITY_DN20731_c0_g1	K05692
mTOR signaling pathway	map04150	11	184	744	6668	TRINITY_DN19486_c0_g2;TRINITY_DN19731_c0_g1;TRINITY_DN20438_c3_g1;TRINITY_DN20438_c3_g3;TRINITY_DN20799_c2_g1;TRINITY_DN23824_c1_g1;TRINITY_DN23824_c1_g2;TRINITY_DN23878_c0_g1;TRINITY_DN25622_c2_g1;TRINITY_DN25996_c0_g2;TRINITY_DN26603_c7_g2	K03259+K14004+K02991+K04456+K14995+K16172+K16172+K02991+K14995+K04527+K02145
Nicotinate and nicotinamide metabolism	map00760	5	55	744	6668	TRINITY_DN16281_c0_g1;TRINITY_DN22066_c1_g2;TRINITY_DN28467_c1_g1;TRINITY_DN31526_c1_g1;TRINITY_DN31526_c1_g2	K00323+K01081+K11412+K01950+K01950
Autophagy - animal	map04140	3	184	744	6668	TRINITY_DN20438_c3_g3;TRINITY_DN23824_c1_g1;TRINITY_DN23824_c1_g2	K04456+K16172+K16172
Fatty acid elongation	map00062	5	46	744	6668	TRINITY_DN22734_c1_g3;TRINITY_DN22752_c1_g1;TRINITY_DN24929_c1_g2;TRINITY_DN24929_c1_g3;TRINITY_DN27600_c1_g1	K10250+K10249+K07508+K07508+K01074
Oocyte meiosis	map04114	1	11	744	6668	TRINITY_DN24759_c0_g3	K06630
Cysteine and methionine metabolism	map00270	25	113	744	6668	TRINITY_DN12897_c1_g1;TRINITY_DN13272_c0_g1;TRINITY_DN13351_c1_g1;TRINITY_DN19257_c3_g4;TRINITY_DN21947_c3_g1;TRINITY_DN26646_c2_g2;TRINITY_DN28109_c0_g1;TRINITY_DN30579_c1_g2;TRINITY_DN30691_c0_g1;TRINITY_DN30820_c1_g1;TRINITY_DN30820_c1_g6;TRINITY_DN31941_c6_g2;TRINITY_DN17593_c0_g1;TRINITY_DN18102_c0_g1;TRINITY_DN18353_c7_g1;TRINITY_DN20802_c1_g1;TRINITY_DN24723_c0_g1;TRINITY_DN26020_c0_g1;TRI…	K00026+K00026+K00797+K00456+K00058+K08963+K01758+K00815+K00802+K00827+K00827+K00789+K01611+K00026+K00827+K21456+K00558+K01251+K00797+K00827+K00815+K08964+K08964+K01738+K11204
Phenylalanine metabolism	map00360	5	32	744	6668	TRINITY_DN25145_c1_g1;TRINITY_DN25145_c1_g2;TRINITY_DN26522_c1_g2;TRINITY_DN29475_c1_g2;TRINITY_DN30579_c1_g2	K00457+K00457+K00457+K01593+K00815
Purine metabolism	map00230	29	277	744	6668	TRINITY_DN13547_c0_g1;TRINITY_DN15593_c0_g1;TRINITY_DN16434_c0_g1;TRINITY_DN16832_c0_g1;TRINITY_DN16907_c0_g1;TRINITY_DN17008_c0_g1;TRINITY_DN18913_c0_g1;TRINITY_DN19346_c0_g1;TRINITY_DN19467_c0_g1;TRINITY_DN20164_c0_g1;TRINITY_DN22066_c1_g2;TRINITY_DN23082_c0_g1;TRINITY_DN23362_c0_g4;TRINITY_DN24896_c1_g2;TRINITY_DN25187_c6_g1;TRINITY_DN27101_c0_g1;TRINITY_DN27257_c0_g1;TRINITY_DN28954_c1_g2;TRI…	K00088+K00106+K00106+K00106+K00106+K00873+K13988+K00944+K01519+K18532+K01081+K12304+K00365+K00106+K01769+K01466+K08043+K11787+K00364+K01587+K10808+K10808+K19572+K01518+K00106+K00106+K00106+K00106+K00940
ECM-receptor interaction	map04512	2	108	744	6668	TRINITY_DN11207_c0_g1;TRINITY_DN15927_c0_g1	K23573+K19719
Drug metabolism - cytochrome P450	map00982	20	132	744	6668	TRINITY_DN14000_c0_g1;TRINITY_DN18609_c0_g1;TRINITY_DN21366_c0_g1;TRINITY_DN21398_c3_g2;TRINITY_DN23267_c1_g1;TRINITY_DN23759_c0_g4;TRINITY_DN24003_c1_g1;TRINITY_DN24026_c0_g2;TRINITY_DN28150_c1_g1;TRINITY_DN31339_c4_g1;TRINITY_DN31339_c4_g2;TRINITY_DN11719_c0_g1;TRINITY_DN20396_c4_g1;TRINITY_DN22786_c1_g1;TRINITY_DN25295_c4_g3;TRINITY_DN25661_c3_g1;TRINITY_DN25889_c2_g1;TRINITY_DN26352_c1_g1;TRI…	K00121+K00699+K00799+K00699+K00799+K00799+K00699+K00699+K00699+K00699+K00699+K00699+K00699+K00799+K00699+K04097+K00799+K00799+K00699+K13299
Ferroptosis	map04216	1	4	744	6668	TRINITY_DN21384_c0_g1	K15041
RNA degradation	map03018	3	109	744	6668	TRINITY_DN12067_c0_g1;TRINITY_DN17435_c0_g1;TRINITY_DN18655_c0_g1	K12621+K12592+K12626
