# Supplementary material for: Transcriptomic and biochemical insights into fall armyworm (Spodoptera frugiperda) responses on silicon-treated maize
Source: PeerJ. 2024 Feb 23;12:e16859. doi: 10.7717/peerj.16859 (PMC10896081; doi:10.7717/peerj.16859)
Supplement: Supplemental Information 4 — Gene expression annotation data [file peerj-12-16859-s004.xlsx]

## Sheet: Contro vs K2SiO3.Mix.annotation
#id	baseMeanA	baseMeanB	log2(LC10/CK)	pvalue	padj	regulated	COG_class	COG_class_annotation	GO_annotation	KEGG_annotation	KOG_class	KOG_class_annotation	Pfam_annotation	Swissprot_annotation	nr_annotation
TRINITY_DN27241_c0_g2	799.238	330.897	-1.27184	0.00169295	0.0427976	down	[H]	Coenzyme transport and metabolism	Cellular Component: mitochondrion (GO:0005739);; Molecular Function: lipoate synthase activity (GO:0016992);; Molecular Function: metal ion binding (GO:0046872);; Molecular Function: 4 iron, 4 sulfur cluster binding (GO:0051539);;	K03644|0.0|haw:110375202|K03644 lipA; lipoyl synthase [EC:2.8.1.8]	[H]	Coenzyme transport and metabolism	N-terminal domain of lipoyl synthase of Radical_SAM family;; Radical SAM superfamily	Lipoyl synthase, mitochondrial OS=Drosophila grimshawi OX=7222 GN=Las PE=3 SV=1	lipoyl synthase, mitochondrial isoform X1 [Spodoptera litura]
TRINITY_DN21985_c3_g1	300.085	1311.34	2.1274	0.000315862	0.0130211	up	--	--	--	K13443|1e-45|haw:110369818|K13443 NPC2; Niemann-Pick C2 protein	--	--	--	--	uncharacterized protein LOC111356566 [Spodoptera litura]
TRINITY_DN26662_c0_g1	81.7596	243.812	1.57753	0.000803796	0.0256307	up	--	--	--	--|0.0|haw:110375793|hypothetical protein	--	--	Folded gastrulation N-terminus	--	uncharacterized protein LOC111359383 [Spodoptera litura]
TRINITY_DN22615_c1_g4	265.534	1451.27	2.44901	3.32e-05	0.00243138	up	[IQ]	--	Molecular Function: ATP binding (GO:0005524);; Cellular Component: peroxisome (GO:0005777);; Biological Process: bioluminescence (GO:0008218);; Molecular Function: metal ion binding (GO:0046872);; Molecular Function: Photinus-luciferin 4-monooxygenase (ATP-hydrolyzing) activity (GO:0047077);;	--|0.0|haw:110384166|hypothetical protein	[I]	Lipid transport and metabolism	AMP-binding enzyme;; AMP-binding enzyme C-terminal domain	Luciferin 4-monooxygenase OS=Photuris pensylvanica OX=1710587 PE=2 SV=2	luciferin 4-monooxygenase-like [Spodoptera litura]
TRINITY_DN20238_c1_g1	406.432	14.7194	-4.79976	9.43e-18	1.64e-14	down	--	--	Molecular Function: structural constituent of cuticle (GO:0042302);;	--|1e-82|haw:110381720|hypothetical protein	--	--	Insect cuticle protein	Cuticle protein 18.6, isoform B OS=Locusta migratoria OX=7004 PE=1 SV=1	cuticle protein 7-like [Helicoverpa armigera]
TRINITY_DN28806_c0_g1	2585.13	773.209	-1.74128	0.000696181	0.0228675	down	--	--	Cellular Component: endoplasmic reticulum membrane (GO:0005789);; Cellular Component: integral component of membrane (GO:0016021);; Molecular Function: metal ion binding (GO:0046872);; Molecular Function: 2 iron, 2 sulfur cluster binding (GO:0051537);;	--|7e-58|pmac:106720638|hypothetical protein	[R]	General function prediction only	Iron-binding zinc finger CDGSH type	CDGSH iron-sulfur domain-containing protein 2 homolog OS=Drosophila yakuba OX=7245 GN=Cisd2 PE=3 SV=1	CDGSH iron-sulfur domain-containing protein 2 homolog [Spodoptera litura]
TRINITY_DN18966_c0_g1	657.511	224.112	-1.55182	0.000275919	0.0118477	down	[J]	Translation, ribosomal structure and biogenesis	Molecular Function: structural constituent of ribosome (GO:0003735);; Biological Process: translation (GO:0006412);; Cellular Component: plastid (GO:0009536);; Cellular Component: small ribosomal subunit (GO:0015935);; Cellular Component: organellar chromatophore (GO:0070111);;	K02967|1e-174|haw:110384468|K02967 RP-S2; small subunit ribosomal protein S2	[J]	Translation, ribosomal structure and biogenesis	Ribosomal protein S2	30S ribosomal protein S2, organellar chromatophore OS=Paulinella chromatophora OX=39717 GN=rps2 PE=3 SV=1	28S ribosomal protein S2, mitochondrial-like [Spodoptera litura]
TRINITY_DN30010_c1_g1	1053.41	371.034	-1.50551	4.22e-06	0.000466547	down	--	--	--	--|0.0|haw:110381978|hypothetical protein	[S]	Function unknown	Predicted transmembrane protein 161AB	--	transmembrane protein 161B [Spodoptera litura]
TRINITY_DN25298_c0_g1	3984.64	284.295	-3.80878	3.61e-06	0.000414778	down	--	--	Cellular Component: integral component of plasma membrane (GO:0005887);; Biological Process: apoptotic process (GO:0006915);; Molecular Function: organic anion transmembrane transporter activity (GO:0008514);; Cellular Component: integral component of membrane (GO:0016021);;	--|1e-118|haw:110379859|hypothetical protein	[R]	General function prediction only	--	Organic cation transporter protein OS=Drosophila melanogaster OX=7227 GN=Orct PE=1 SV=1	organic cation transporter protein-like [Spodoptera litura]
TRINITY_DN22358_c2_g1	757.42	311.026	-1.28359	0.00177349	0.0439339	down	--	--	Biological Process: amino acid transmembrane transport (GO:0003333);; Cellular Component: lysosomal membrane (GO:0005765);; Cellular Component: vacuolar membrane (GO:0005774);; Cellular Component: plasma membrane (GO:0005886);; Molecular Function: amino acid transmembrane transporter activity (GO:0015171);; Cellular Component: integral component of membrane (GO:0016021);; Cellular Component: axon…	K14209|0.0|haw:110370999|K14209 SLC36A; solute carrier family 36 (proton-coupled amino acid transporter)	[E]	Amino acid transport and metabolism	Transmembrane amino acid transporter protein	Proton-coupled amino acid transporter-like protein pathetic OS=Drosophila melanogaster OX=7227 GN=path PE=1 SV=1	proton-coupled amino acid transporter-like protein pathetic [Spodoptera litura]
TRINITY_DN23746_c0_g1	0	15.2251	6.21593	0.000742524	0.0240432	up	--	--	--	K00469|4e-07|tnl:113502943|K00469 MIOX; inositol oxygenase [EC:1.13.99.1]	--	--	--	--	hypothetical protein B5V51_14536 [Heliothis virescens]
TRINITY_DN17806_c0_g1	3.28799	72.7984	4.39942	1.71e-06	0.000224747	up	[IQ]	--	Molecular Function: ATP binding (GO:0005524);; Biological Process: phenylpropanoid metabolic process (GO:0009698);; Molecular Function: 4-coumarate-CoA ligase activity (GO:0016207);;	--|1e-101|haw:110369823|hypothetical protein	--	--	AMP-binding enzyme	Probable 4-coumarate--CoA ligase 1 OS=Dictyostelium discoideum OX=44689 GN=4cl1 PE=3 SV=1	4-coumarate--CoA ligase 1-like [Spodoptera litura]
TRINITY_DN29622_c0_g1	0	29.0845	7.14782	3.18e-05	0.00235463	up	--	--	Molecular Function: metalloendopeptidase activity (GO:0004222);; Molecular Function: serine-type endopeptidase inhibitor activity (GO:0004867);; Molecular Function: extracellular matrix structural constituent (GO:0005201);; Cellular Component: basement membrane (GO:0005604);; Biological Process: multicellular organism development (GO:0007275);; Molecular Function: zinc ion binding (GO:0008270);; …	--|0.0|haw:110380133|hypothetical protein	--	--	--	Papilin OS=Drosophila melanogaster OX=7227 GN=Ppn PE=1 SV=2	uncharacterized protein LOC111359756 [Spodoptera litura]
TRINITY_DN26242_c5_g1	1236.47	95.7883	-3.69099	1.84e-12	1.4e-09	down	--	--	Molecular Function: extracellular matrix structural constituent (GO:0005201);; Cellular Component: collagen trimer (GO:0005581);; Cellular Component: basement membrane (GO:0005604);;	K06237|7e-50|tnl:113501210|K06237 COL4A; collagen, type IV, alpha	[W]	Extracellular structures	Collagen triple helix repeat (20 copies)	Collagen alpha-2(IV) chain OS=Ascaris suum OX=6253 PE=2 SV=1	collagen alpha-1(IV) chain [Spodoptera litura]
TRINITY_DN30895_c1_g1	7.64481	54.8389	2.79619	0.000156907	0.00778701	up	--	--	--	K22657|1e-101|haw:110382330|K22657 IGDCC4; immunoglobulin superfamily DCC subclass member 4	--	--	--	--	protogenin-like isoform X4 [Spodoptera litura]
TRINITY_DN30728_c2_g1	42.6588	296.419	2.79154	0.00151576	0.0399546	up	[Q]	Secondary metabolites biosynthesis, transport and catabolism	Molecular Function: iron ion binding (GO:0005506);; Cellular Component: endoplasmic reticulum membrane (GO:0005789);; Molecular Function: heme binding (GO:0020037);; Cellular Component: organelle membrane (GO:0031090);; Molecular Function: aromatase activity (GO:0070330);;	--|0.0|tnl:113495221|hypothetical protein	[QI]	--	Cytochrome P450	Cytochrome P450 4C1 OS=Blaberus discoidalis OX=6981 GN=CYP4C1 PE=2 SV=1	uncharacterized protein LOC111356966 [Spodoptera litura]
TRINITY_DN19862_c0_g1	1927.87	573.392	-1.74894	0.000167533	0.00819087	down	[J]	Translation, ribosomal structure and biogenesis	Molecular Function: RNA binding (GO:0003723);; Molecular Function: structural constituent of ribosome (GO:0003735);; Cellular Component: mitochondrion (GO:0005739);; Biological Process: translation (GO:0006412);; Cellular Component: large ribosomal subunit (GO:0015934);; Molecular Function: transferase activity (GO:0016740);;	K02886|0.0|haw:110373829|K02886 RP-L2; large subunit ribosomal protein L2	[J]	Translation, ribosomal structure and biogenesis	Ribosomal Proteins L2, C-terminal domain;; Ribosomal Proteins L2, RNA binding domain	60S ribosomal protein L2, mitochondrial OS=Reclinomonas americana OX=48483 GN=RPL2 PE=3 SV=2	39S ribosomal protein L2, mitochondrial [Spodoptera litura]
TRINITY_DN25350_c1_g4	1952.56	13.0225	-7.22505	4.98e-07	8.2e-05	down	--	--	--	--	--	--	--	--	uncharacterized protein LOC111350902 [Spodoptera litura]
TRINITY_DN31492_c0_g1	713.678	176.341	-2.0156	0.00200374	0.0476842	down	--	--	Molecular Function: metalloendopeptidase activity (GO:0004222);; Molecular Function: serine-type endopeptidase inhibitor activity (GO:0004867);; Molecular Function: extracellular matrix structural constituent (GO:0005201);; Cellular Component: basement membrane (GO:0005604);; Biological Process: multicellular organism development (GO:0007275);; Molecular Function: zinc ion binding (GO:0008270);; …	--|3e-57|aag:110675187|hypothetical protein	--	--	--	Papilin OS=Drosophila melanogaster OX=7227 GN=Ppn PE=1 SV=2	papilin-like isoform X1 [Spodoptera litura]
TRINITY_DN25624_c0_g2	578.412	171.943	-1.74991	0.000146114	0.00745106	down	--	--	--	K17435|2e-30|bmor:100125602|K17435 MRPL54; large subunit ribosomal protein L54	[J]	Translation, ribosomal structure and biogenesis	--	--	39S ribosomal protein L54, mitochondrial [Spodoptera litura]
TRINITY_DN23485_c1_g2	32.0117	251.044	2.96759	0.000206225	0.00969032	up	--	--	Molecular Function: serine-type endopeptidase activity (GO:0004252);;	--|1e-42|haw:110379569|hypothetical protein	[E]	Amino acid transport and metabolism	Trypsin	Serine protease SP24D OS=Anopheles gambiae OX=7165 GN=Sp24D PE=2 SV=3	chymotrypsin-1-like [Spodoptera litura]
TRINITY_DN19824_c0_g1	0.293391	33.0407	6.36924	1.24e-05	0.00112323	up	--	--	Cellular Component: mitochondrial inner membrane (GO:0005743);; Biological Process: mitochondrial transport (GO:0006839);; Cellular Component: integral component of membrane (GO:0016021);; Molecular Function: transmembrane transporter activity (GO:0022857);;	K05863|9e-99|fcd:110856652|K05863 SLC25A4S; solute carrier family 25 (mitochondrial adenine nucleotide translocator), member 4/5/6/31	[C]	Energy production and conversion	Mitochondrial carrier protein	ADP,ATP carrier protein 1 OS=Anopheles gambiae OX=7165 GN=AGAP006782 PE=2 SV=2	adenine nucleotide translocator, putative [Acanthamoeba castellanii str. Neff]
TRINITY_DN30558_c0_g1	125.689	509.568	2.01872	9.98e-06	0.000945072	up	--	--	Biological Process: cell adhesion (GO:0007155);; Biological Process: integrin-mediated signaling pathway (GO:0007229);; Cellular Component: integrin complex (GO:0008305);; Cellular Component: cell surface (GO:0009986);; Cellular Component: M band (GO:0031430);; Biological Process: regulation of actin cytoskeleton organization (GO:0032956);; Biological Process: positive regulation of locomotion (G…	--|0.0|haw:110371062|hypothetical protein	[TW]	--	Integrin beta cytoplasmic domain	Integrin beta pat-3 OS=Caenorhabditis elegans OX=6239 GN=pat-3 PE=1 SV=1	integrin beta-PS-like [Spodoptera litura]
TRINITY_DN19949_c2_g2	19.824	2932.91	7.18904	3.72e-37	3.67e-33	up	--	--	Cellular Component: extracellular region (GO:0005576);;	--|8e-85|haw:110374170|hypothetical protein	--	--	Fibroin light chain (L-fibroin)	Fibroin light chain OS=Galleria mellonella OX=7137 GN=FIBL PE=1 SV=1	fibroin light chain-like [Spodoptera litura]
TRINITY_DN30820_c1_g1	22.2767	104.595	2.2482	5.4e-05	0.00347748	up	[E]	Amino acid transport and metabolism	Cellular Component: mitochondrion (GO:0005739);; Molecular Function: alanine-glyoxylate transaminase activity (GO:0008453);; Biological Process: arginine catabolic process to glutamate (GO:0019544);; Molecular Function: pyridoxal phosphate binding (GO:0030170);; Biological Process: response to nicotine (GO:0035094);; Molecular Function: identical protein binding (GO:0042802);;	K00827|7e-77|tnl:113498037|K00827 AGXT2; alanine-glyoxylate transaminase / (R)-3-amino-2-methylpropionate-pyruvate transaminase [EC:2.6.1.44 2.6.1.40]	[E]	Amino acid transport and metabolism	Aminotransferase class-III	Alanine--glyoxylate aminotransferase 2-like OS=Drosophila melanogaster OX=7227 GN=CG8745 PE=2 SV=2	alanine--glyoxylate aminotransferase 2, mitochondrial [Spodoptera litura]
TRINITY_DN16220_c0_g1	222.337	65.6455	-1.75768	0.00163149	0.041887	down	--	--	Cellular Component: mitochondrial intermembrane space (GO:0005758);; Cellular Component: cytosol (GO:0005829);; Biological Process: aerobic respiration (GO:0009060);; Biological Process: mitochondrial respiratory chain complex IV assembly (GO:0033617);;	K18183|6e-55|haw:110372801|K18183 COX19; cytochrome c oxidase assembly protein subunit 19	[C]	Energy production and conversion	CHCH domain	Cytochrome c oxidase assembly protein COX19 OS=Dictyostelium discoideum OX=44689 GN=cox19 PE=3 SV=1	cytochrome c oxidase assembly protein COX19 [Spodoptera litura]
TRINITY_DN30440_c1_g1	1087.95	384.827	-1.49937	0.000979653	0.0292592	down	--	--	--	K19199|0.0|haw:110384555|K19199 SETD3; histone-lysine N-methyltransferase SETD3 [EC:2.1.1.43]	[R]	General function prediction only	SET domain;; Rubisco LSMT substrate-binding;; SET domain	--	histone-lysine N-methyltransferase setd3 [Spodoptera litura]
TRINITY_DN27914_c0_g1	214.049	1240.88	2.53492	0.000341204	0.0137915	up	[GEPR]	--	Cellular Component: plasma membrane (GO:0005886);; Biological Process: sodium ion transport (GO:0006814);; Biological Process: anion transport (GO:0006820);; Molecular Function: phosphate ion transmembrane transporter activity (GO:0015114);; Molecular Function: symporter activity (GO:0015293);; Cellular Component: integral component of membrane (GO:0016021);; Molecular Function: transmembrane tra…	K08193|0.0|tnl:113492466|K08193 SLC17A; MFS transporter, ACS family, solute carrier family 17 (sodium-dependent inorganic phosphate cotransporter), other	[G]	Carbohydrate transport and metabolism	Major Facilitator Superfamily	Putative inorganic phosphate cotransporter OS=Drosophila melanogaster OX=7227 GN=Picot PE=2 SV=1	sialin-like isoform X2 [Spodoptera litura]
TRINITY_DN22659_c1_g2	107.316	24.0491	-2.15034	3.9e-05	0.00277099	down	[J]	Translation, ribosomal structure and biogenesis	Molecular Function: translation elongation factor activity (GO:0003746);; Molecular Function: GTPase activity (GO:0003924);; Molecular Function: GTP binding (GO:0005525);; Cellular Component: mitochondrion (GO:0005739);;	K02358|1e-140|haw:110381705|K02358 tuf; elongation factor Tu	[J]	Translation, ribosomal structure and biogenesis	Elongation factor Tu domain 2;; Elongation factor Tu C-terminal domain	Elongation factor Tu, mitochondrial OS=Reclinomonas americana OX=48483 GN=TUFA PE=3 SV=1	uncharacterized protein LOC111364618 [Spodoptera litura]
TRINITY_DN23379_c3_g6	518.534	76.9119	-2.7536	4.03e-08	1e-05	down	--	--	--	--|8e-41|haw:110378395|hypothetical protein	[L]	Replication, recombination and repair	--	--	three prime repair exonuclease 2-like [Spodoptera litura]
TRINITY_DN14979_c0_g1	12.4629	85.2594	2.76156	1.17e-06	0.000166388	up	--	--	--	--	--	--	--	--	period circadian protein isoform X14 [Spodoptera litura]
TRINITY_DN26796_c1_g2	207.353	1543	2.89709	1.46e-05	0.00125807	up	--	--	--	--|1e-23|tnl:113497784|hypothetical protein	--	--	Lytic polysaccharide mono-oxygenase, cellulose-degrading	--	uncharacterized protein LOC111353941 [Spodoptera litura]
TRINITY_DN20673_c2_g1	4478.09	250.974	-4.15752	0.000238179	0.0106137	down	--	--	Molecular Function: structural constituent of chorion (GO:0005213);; Biological Process: multicellular organism development (GO:0007275);; Biological Process: chorion-containing eggshell formation (GO:0007304);; Cellular Component: chorion (GO:0042600);;	--|1e-65|haw:110381343|hypothetical protein	--	--	--	Chorion class B protein B.L1 (Fragment) OS=Bombyx mori OX=7091 PE=3 SV=1	hypothetical protein B5V51_6399 [Heliothis virescens]
TRINITY_DN28567_c1_g1	8.1031	79.5302	3.25424	1.63e-06	0.000217483	up	--	--	Molecular Function: RNA binding (GO:0003723);; Biological Process: mRNA polyadenylation (GO:0006378);; Biological Process: pole cell migration (GO:0007280);; Biological Process: germ cell development (GO:0007281);; Biological Process: spermatogenesis (GO:0007283);; Biological Process: oocyte anterior/posterior axis specification (GO:0007314);; Molecular Function: zinc ion binding (GO:0008270);; B…	K18741|1e-119|tnl:113498947|K18741 NANOS1; protein nanos 1	[R]	General function prediction only	Nanos RNA binding domain	Protein nanos OS=Drosophila melanogaster OX=7227 GN=nos PE=1 SV=1	uncharacterized protein LOC111364974 isoform X1 [Spodoptera litura]
TRINITY_DN30853_c1_g1	200.685	887.038	2.14218	0.000113742	0.00620617	up	[E]	Amino acid transport and metabolism	Biological Process: negative regulation of protein phosphorylation (GO:0001933);; Molecular Function: carboxypeptidase activity (GO:0004180);; Molecular Function: metallocarboxypeptidase activity (GO:0004181);; Cellular Component: extracellular region (GO:0005576);; Cellular Component: extracellular space (GO:0005615);; Biological Process: peptide metabolic process (GO:0006518);; Biological Proce…	--|0.0|haw:110372804|hypothetical protein	[R]	General function prediction only	Zinc carboxypeptidase;; Carboxypeptidase regulatory-like domain	Carboxypeptidase D OS=Drosophila melanogaster OX=7227 GN=svr PE=1 SV=2	carboxypeptidase M isoform X2 [Spodoptera litura]
TRINITY_DN19664_c0_g1	3207.32	708.459	-2.17841	0.000641955	0.0216874	down	--	--	Molecular Function: structural molecule activity (GO:0005198);; Cellular Component: lamin filament (GO:0005638);; Cellular Component: nuclear lamina (GO:0005652);; Biological Process: chromatin organization (GO:0006325);; Biological Process: chromatin silencing (GO:0006342);; Cellular Component: membrane (GO:0016020);; Biological Process: regulation of actin filament polymerization (GO:0030833);;…	K07611|0.0|tnl:113501742|K07611 LMNB; lamin B	[DY]	--	Intermediate filament protein	Lamin-C OS=Drosophila melanogaster OX=7227 GN=LamC PE=1 SV=2	Dm0-like lamin [Spodoptera frugiperda]
TRINITY_DN26251_c1_g5	78.2927	9.70976	-3.00672	0.000112107	0.0061729	down	[S]	Function unknown	Molecular Function: DNA binding (GO:0003677);;	--|2e-45|haw:110370484|hypothetical protein	--	--	--	Uncharacterized proline-rich protein (Fragment) OS=Owenia fusiformis OX=6347 PE=4 SV=1	proline-rich extensin-like protein EPR1 [Spodoptera litura]
TRINITY_DN25968_c1_g1	83.4801	1205.92	3.84764	0.000152352	0.00765067	up	--	--	Molecular Function: serine-type endopeptidase activity (GO:0004252);; Cellular Component: extracellular region (GO:0005576);; Cellular Component: cytoplasm (GO:0005737);; Biological Process: digestion (GO:0007586);;	--|0.0|haw:110380360|hypothetical protein	[E]	Amino acid transport and metabolism	Trypsin;; Trypsin-like peptidase domain	Trypsin-7 OS=Anopheles gambiae OX=7165 GN=TRYP7 PE=2 SV=2	transmembrane protease serine 9-like [Spodoptera litura]
TRINITY_DN29976_c0_g1	22.9602	110.079	2.25035	0.00130686	0.0361529	up	[L]	Replication, recombination and repair	Molecular Function: nucleic acid binding (GO:0003676);; Molecular Function: RNA-directed DNA polymerase activity (GO:0003964);; Molecular Function: aspartic-type endopeptidase activity (GO:0004190);; Molecular Function: endonuclease activity (GO:0004519);; Biological Process: DNA integration (GO:0015074);;	--|1e-103|pxy:105381841|hypothetical protein	[R]	General function prediction only	Reverse transcriptase (RNA-dependent DNA polymerase)	Retrovirus-related Pol polyprotein from transposon 297 OS=Drosophila melanogaster OX=7227 GN=pol PE=3 SV=1	hypothetical protein TcasGA2_TC032951 [Tribolium castaneum]
TRINITY_DN21941_c0_g1	684.326	253.759	-1.43096	0.000361785	0.0144851	down	[G]	Carbohydrate transport and metabolism	Cellular Component: mitochondrion (GO:0005739);; Molecular Function: phosphatase activity (GO:0016791);;	K19269|0.0|haw:110370042|K19269 PGP; phosphoglycolate phosphatase [EC:3.1.3.18 3.1.3.48]	[P]	Inorganic ion transport and metabolism	Haloacid dehalogenase-like hydrolase;; HAD-hyrolase-like;; haloacid dehalogenase-like hydrolase	Putative NipSnap protein K02D10.1 OS=Caenorhabditis elegans OX=6239 GN=K02D10.1 PE=2 SV=4	glycerol-3-phosphate phosphatase-like [Spodoptera litura]
TRINITY_DN12733_c0_g1	705.372	215.172	-1.71196	0.000561894	0.0197015	down	--	--	--	--|3e-65|haw:110370832|hypothetical protein	--	--	Mitochondrial ribosome protein 63	--	uncharacterized protein LOC111360110 [Spodoptera litura]
TRINITY_DN19879_c0_g1	15.0933	126.566	3.05906	0.00012188	0.00650641	up	[E]	Amino acid transport and metabolism	Cellular Component: extracellular region (GO:0005576);; Molecular Function: oxidoreductase activity, acting on CH-OH group of donors (GO:0016614);; Molecular Function: flavin adenine dinucleotide binding (GO:0050660);;	--|0.0|haw:110382468|hypothetical protein	[R]	General function prediction only	GMC oxidoreductase;; GMC oxidoreductase;; Pyridine nucleotide-disulphide oxidoreductase;; NAD(P)-binding Rossmann-like domain;; FAD binding domain	Glucose dehydrogenase [FAD, quinone] OS=Drosophila pseudoobscura pseudoobscura OX=46245 GN=Gld PE=3 SV=4	glucose dehydrogenase [FAD, quinone]-like [Spodoptera litura]
TRINITY_DN26864_c0_g1	380.798	127.613	-1.57616	0.000805277	0.0256307	down	--	--	Molecular Function: ATP binding (GO:0005524);; Cellular Component: mitochondrion (GO:0005739);; Cellular Component: mitochondrial inner membrane (GO:0005743);; Molecular Function: protein transmembrane transporter activity (GO:0008320);; Cellular Component: integral component of membrane (GO:0016021);; Biological Process: mitochondrial respiratory chain complex III assembly (GO:0034551);; Biologi…	K08900|0.0|haw:110371416|K08900 BCS1; mitochondrial chaperone BCS1	[O]	Posttranslational modification, protein turnover, chaperones	BCS1 N terminal;; ATPase family associated with various cellular activities (AAA)	Probable mitochondrial chaperone BCS1-B OS=Dictyostelium discoideum OX=44689 GN=bcsl1b PE=3 SV=1	mitochondrial chaperone BCS1 [Spodoptera litura]
TRINITY_DN22364_c0_g1	10550.3	349.684	-4.91534	0.00132803	0.0364847	down	--	--	Molecular Function: structural constituent of cuticle (GO:0042302);;	--|3e-08|haw:110384200|hypothetical protein	--	--	--	Larval cuticle protein LCP-17 OS=Bombyx mori OX=7091 GN=LCP17 PE=2 SV=1	endocuticle structural glycoprotein SgAbd-2-like [Spodoptera litura]
TRINITY_DN27636_c0_g1	2.52567	45.3343	4.15534	1.51e-05	0.00129409	up	[R]	General function prediction only	Biological Process: negative regulation of transcription by RNA polymerase II (GO:0000122);; Molecular Function: enhancer sequence-specific DNA binding (GO:0001158);; Cellular Component: nucleus (GO:0005634);; Cellular Component: cytoplasm (GO:0005737);; Biological Process: transcription, DNA-templated (GO:0006351);; Biological Process: determination of adult lifespan (GO:0008340);; Biological Pr…	--|0.0|haw:110384087|hypothetical protein	[K]	Transcription	Zinc-finger double domain;; Zinc finger, C2H2 type;; C2H2-type zinc finger;; C2H2-type zinc finger;; Zinc-finger of C2H2 type;; Zinc-finger double-stranded RNA-binding	B lymphocyte-induced maturation protein 1 homolog OS=Caenorhabditis elegans OX=6239 GN=blmp-1 PE=1 SV=1	uncharacterized protein LOC111349436 isoform X1 [Spodoptera litura]
TRINITY_DN23944_c0_g1	13386.5	10.8353	-10.2723	0.00187388	0.0455076	down	[I]	Lipid transport and metabolism	Cellular Component: endoplasmic reticulum membrane (GO:0005789);; Biological Process: fatty acid biosynthetic process (GO:0006633);; Cellular Component: integral component of membrane (GO:0016021);; Molecular Function: acyl-CoA delta11-desaturase activity (GO:0017105);; Molecular Function: metal ion binding (GO:0046872);;	K00507|1e-104|haw:110380342|K00507 SCD; stearoyl-CoA desaturase (Delta-9 desaturase) [EC:1.14.19.1]	[I]	Lipid transport and metabolism	Fatty acid desaturase	Acyl-CoA Delta(11) desaturase OS=Trichoplusia ni OX=7111 GN=D11DS PE=1 SV=2	acyl-CoA Delta(11) desaturase-like [Spodoptera litura]
TRINITY_DN27105_c2_g1	373.529	89.466	-2.0599	0.0020002	0.0476383	down	--	--	Biological Process: multicellular organism development (GO:0007275);; Biological Process: myoblast fusion (GO:0007520);; Cellular Component: membrane (GO:0016020);; Cellular Component: integral component of membrane (GO:0016021);;	--|1e-145|tnl:113501877|hypothetical protein	--	--	--	Protein rolling stone OS=Drosophila melanogaster OX=7227 GN=rost PE=2 SV=2	protein rolling stone-like [Spodoptera litura]
TRINITY_DN19798_c0_g1	3150.56	1123.44	-1.48743	0.000798015	0.025478	down	--	--	--	K03217|0.0|haw:110373831|K03217 yidC; YidC/Oxa1 family membrane protein insertase	[OU]	--	60Kd inner membrane protein	--	mitochondrial inner membrane protein OXA1L-like [Spodoptera litura]
TRINITY_DN29522_c1_g2	4.48782	75.8248	4.09817	3.63e-07	6.45e-05	up	--	--	--	--|1e-112|tnl:113493380|hypothetical protein	[R]	General function prediction only	Major Facilitator Superfamily	--	solute carrier family 22 member 5-like isoform X2 [Spodoptera litura]
TRINITY_DN26558_c0_g1	329.275	1.89023	-7.42224	7.42e-08	1.63e-05	down	--	--	Cellular Component: extracellular region (GO:0005576);; Molecular Function: structural constituent of chitin-based larval cuticle (GO:0008010);; Molecular Function: chitin binding (GO:0008061);; Molecular Function: extracellular matrix constituent conferring elasticity (GO:0030023);; Cellular Component: extracellular matrix (GO:0031012);; Cellular Component: protein-carbohydrate complex (GO:00329…	--|0.0|haw:110380157|hypothetical protein	--	--	Insect cuticle protein;; Domain of unknown function (DUF4794)	Pro-resilin OS=Drosophila melanogaster OX=7227 GN=resilin PE=1 SV=1	pro-resilin-like [Spodoptera litura]
TRINITY_DN19902_c3_g1	7002.62	250.891	-4.80292	0.00190345	0.0459773	down	--	--	Molecular Function: neuropeptide hormone activity (GO:0005184);; Cellular Component: extracellular region (GO:0005576);; Biological Process: neuropeptide signaling pathway (GO:0007218);;	--|4e-31|haw:110370177|hypothetical protein	--	--	--	Neuropeptide-like 4 OS=Drosophila melanogaster OX=7227 GN=Nplp4 PE=1 SV=1	hypothetical protein B5V51_1859 [Heliothis virescens]
TRINITY_DN28355_c0_g2	6388.83	2479.8	-1.36538	0.000209483	0.00979749	down	--	--	--	--|9e-13|btab:109042410|hypothetical protein	--	--	--	--	protein PFC0760c-like [Spodoptera litura]
TRINITY_DN24759_c0_g4	496.703	141.242	-1.81349	0.000531574	0.0189298	down	--	--	--	K17423|6e-65|haw:110383785|K17423 MRPL42; large subunit ribosomal protein L42	[S]	Function unknown	Mitochondrial 28S ribosomal protein S32	--	hypothetical protein B5V51_13201 [Heliothis virescens]
TRINITY_DN24140_c0_g1	1674.68	156.686	-3.41823	9.28e-07	0.000136569	down	--	--	Molecular Function: extracellular matrix structural constituent (GO:0005201);; Cellular Component: extracellular matrix (GO:0031012);; Biological Process: cellular response to ecdysone (GO:0071390);;	--|0.0|haw:110376711|hypothetical protein	--	--	Zona pellucida-like domain	Salivary glue protein Sgs-3 OS=Drosophila melanogaster OX=7227 GN=Sgs3 PE=2 SV=1	mucin-2-like [Spodoptera litura]
TRINITY_DN12287_c0_g1	68.8722	0.848197	-6.34509	0.000118171	0.00634268	down	--	--	--	--|0.0|haw:110378210|hypothetical protein	--	--	--	--	uncharacterized protein LOC111361082 [Spodoptera litura]
TRINITY_DN18602_c0_g1	92.3555	2.21152	-5.41857	0.000316479	0.0130211	down	--	--	Molecular Function: structural constituent of cuticle (GO:0042302);;	--|0.0|haw:110376237|hypothetical protein	--	--	Insect cuticle protein	Pupal cuticle protein 36 OS=Manduca sexta OX=7130 GN=PCP36 PE=1 SV=1	uncharacterized protein LOC111349437 [Spodoptera litura]
TRINITY_DN29485_c0_g1	68.8228	8.86156	-2.96093	0.000653467	0.0219165	down	--	--	--	--	--	--	--	--	counting factor associated protein D-like [Spodoptera litura]
TRINITY_DN24685_c1_g1	54.0158	1202.76	4.47631	5.97e-05	0.00379636	up	--	--	--	--|4e-27|tnl:113501805|hypothetical protein	--	--	--	Fibroin heavy chain OS=Bombyx mori OX=7091 GN=FIBH PE=1 SV=4	spidroin-1-like [Spodoptera litura]
TRINITY_DN22085_c0_g2	405.801	36.845	-3.4625	0.00101132	0.0300234	down	--	--	Cellular Component: integral component of peroxisomal membrane (GO:0005779);; Biological Process: protein import into peroxisome matrix, docking (GO:0016560);;	--|4e-30|haw:110381605|hypothetical protein	--	--	--	Probable peroxisomal membrane protein PEX13 OS=Dictyostelium discoideum OX=44689 GN=pex13 PE=3 SV=1	uncharacterized protein LOC111356639 [Spodoptera litura]
TRINITY_DN13931_c0_g1	3.91168	27.8436	2.80809	0.000849344	0.0265122	up	--	--	--	--|8e-12|haw:110370431|hypothetical protein	--	--	--	--	hypothetical protein B5V51_11355, partial [Heliothis virescens]
TRINITY_DN28230_c0_g1	26.3942	344.205	3.71097	0.000287274	0.0121591	up	--	--	--	--|1e-128|haw:110377516|hypothetical protein	--	--	--	Fibroin heavy chain OS=Bombyx mori OX=7091 GN=FIBH PE=1 SV=4	glycine-rich cell wall structural protein 1.8-like [Spodoptera litura]
TRINITY_DN19277_c2_g1	1321.79	47.6985	-4.79356	6.64e-07	0.000103045	down	--	--	Molecular Function: structural constituent of cuticle (GO:0042302);;	--|1e-40|tnl:113508875|hypothetical protein	--	--	Insect cuticle protein	Larval cuticle protein LCP-17 OS=Bombyx mori OX=7091 GN=LCP17 PE=2 SV=1	larval cuticle protein LCP-17-like [Spodoptera litura]
TRINITY_DN31502_c1_g2	650.437	2352.61	1.85404	0.00138496	0.0376552	up	--	--	Biological Process: negative regulation of transcription by RNA polymerase II (GO:0000122);; Biological Process: circadian regulation of heart rate (GO:0003053);; Cellular Component: nucleus (GO:0005634);; Cellular Component: cytoplasm (GO:0005737);; Biological Process: protein import into nucleus (GO:0006606);; Biological Process: mating behavior (GO:0007617);; Biological Process: copulation (GO…	K12074|0.0|haw:110375458|K12074 TIM; timeless	[L]	Replication, recombination and repair	Timeless protein	Protein timeless OS=Drosophila melanogaster OX=7227 GN=tim PE=1 SV=3	protein timeless isoform X2 [Spodoptera litura]
TRINITY_DN24048_c0_g1	582.436	33.4507	-4.12271	0.0011218	0.0322999	down	--	--	--	--|1e-172|haw:110370463|hypothetical protein	--	--	--	--	transcriptional activator MN1-like [Spodoptera litura]
TRINITY_DN17899_c0_g1	2212.51	2.86149	-9.61682	2.55e-08	6.75e-06	down	--	--	Molecular Function: zinc ion transmembrane transporter activity (GO:0005385);; Cellular Component: cell (GO:0005623);; Biological Process: zinc ion transport (GO:0006829);; Biological Process: cellular zinc ion homeostasis (GO:0006882);; Biological Process: response to zinc ion (GO:0010043);; Cellular Component: membrane (GO:0016020);; Cellular Component: integral component of membrane (GO:001602…	--|0.0|haw:110371332|hypothetical protein	--	--	Domain of unknown function (DUF4779)	Probable zinc transporter protein DDB_G0282067 OS=Dictyostelium discoideum OX=44689 GN=DDB_G0282067 PE=2 SV=1	hypothetical protein B5V51_1828 [Heliothis virescens]
TRINITY_DN23852_c3_g1	6993.95	2413.72	-1.53471	0.000946326	0.0285808	down	--	--	--	--|1e-118|haw:110379580|hypothetical protein	--	--	Insect allergen related repeat, nitrile-specifier detoxification	--	single domain major allergen 1 protein, partial [Spodoptera frugiperda]
TRINITY_DN26193_c0_g1	2181.34	193	-3.49877	2.18e-05	0.00174826	down	[I]	Lipid transport and metabolism	Biological Process: lipid transport (GO:0006869);; Biological Process: multicellular organism development (GO:0007275);; Molecular Function: lipid binding (GO:0008289);; Cellular Component: integral component of membrane (GO:0016021);; Molecular Function: transferase activity, transferring acyl groups other than amino-acyl groups (GO:0016747);;	--|0.0|haw:110370994|hypothetical protein	[R]	General function prediction only	Acyltransferase family	Nose resistant to fluoxetine protein 6 OS=Caenorhabditis elegans OX=6239 GN=nrf-6 PE=1 SV=3	nose resistant to fluoxetine protein 6 [Spodoptera litura]
TRINITY_DN23254_c0_g3	1716.51	40.1183	-5.41495	1.67e-14	1.65e-11	down	--	--	Molecular Function: carbohydrate binding (GO:0030246);;	K10091|1e-35|tnl:113507075|K10091 LGALS4; galectin-4	[W]	Extracellular structures	Galactoside-binding lectin	32 kDa beta-galactoside-binding lectin OS=Haemonchus contortus OX=6289 GN=GAL-1 PE=2 SV=1	galectin-9-like isoform X2 [Spodoptera litura]
TRINITY_DN24436_c0_g2	189.603	50.4823	-1.90484	0.000833301	0.0262295	down	--	--	Biological Process: multicellular organism development (GO:0007275);; Biological Process: myoblast fusion (GO:0007520);; Cellular Component: membrane (GO:0016020);; Cellular Component: integral component of membrane (GO:0016021);;	--|1e-66|haw:110378572|hypothetical protein	--	--	--	Protein rolling stone OS=Drosophila melanogaster OX=7227 GN=rost PE=2 SV=2	protein rolling stone-like [Spodoptera litura]
TRINITY_DN15579_c1_g1	51.2802	11.8277	-2.11774	0.000922548	0.0281206	down	--	--	Molecular Function: actin binding (GO:0003779);; Cellular Component: cytosol (GO:0005829);; Cellular Component: plasma membrane (GO:0005886);; Biological Process: mitotic cell cycle (GO:0007067);; Biological Process: female germline ring canal formation (GO:0007301);; Biological Process: cytoplasmic transport, nurse cell to oocyte (GO:0007303);; Biological Process: learning or memory (GO:0007611)…	K04437|2e-68|tnl:113497913|K04437 FLNA; filamin	[Z]	Cytoskeleton	Filamin/ABP280 repeat	Filamin-A OS=Drosophila melanogaster OX=7227 GN=cher PE=1 SV=2	filamin-A isoform X5 [Spodoptera litura]
TRINITY_DN21831_c1_g2	67.199	485.885	2.85415	1.18e-05	0.00107893	up	--	--	--	--|3e-41|bmor:101741350|hypothetical protein	--	--	--	--	uncharacterized protein LOC111353864 [Spodoptera litura]
TRINITY_DN18229_c0_g1	3730.78	1322.19	-1.49646	0.000630841	0.021506	down	[IQR]	--	Molecular Function: 3-hydroxyacyl-CoA dehydrogenase activity (GO:0003857);; Molecular Function: estradiol 17-beta-dehydrogenase activity (GO:0004303);; Cellular Component: mitochondrion (GO:0005739);; Cellular Component: lipid droplet (GO:0005811);; Cellular Component: cytosol (GO:0005829);; Cellular Component: microtubule associated complex (GO:0005875);; Biological Process: fatty acid metabolic…	K08683|7e-97|tnl:113494026|K08683 HSD17B10; 3-hydroxyacyl-CoA dehydrogenase / 3-hydroxy-2-methylbutyryl-CoA dehydrogenase [EC:1.1.1.35 1.1.1.178]	[Q]	Secondary metabolites biosynthesis, transport and catabolism	short chain dehydrogenase;; Enoyl-(Acyl carrier protein) reductase;; KR domain;; NAD dependent epimerase/dehydratase family;; 3-beta hydroxysteroid dehydrogenase/isomerase family	3-hydroxyacyl-CoA dehydrogenase type-2 OS=Drosophila melanogaster OX=7227 GN=scu PE=1 SV=1	3-hydroxyacyl-CoA dehydrogenase type-2 [Spodoptera litura]
TRINITY_DN29094_c2_g1	12.3011	140.131	3.51196	0.000434915	0.016394	up	--	--	Molecular Function: RNA polymerase II regulatory region sequence-specific DNA binding (GO:0000977);; Molecular Function: RNA polymerase II transcription factor binding (GO:0001085);; Molecular Function: transcriptional activator activity, RNA polymerase II transcription regulatory region sequence-specific DNA binding (GO:0001228);; Molecular Function: chromatin binding (GO:0003682);; Cellular Com…	K03006|1e-11|lcf:108885063|K03006 RPB1; DNA-directed RNA polymerase II subunit RPB1 [EC:2.7.7.6]	[K]	Transcription	--	GATA zinc finger domain-containing protein 14 OS=Dictyostelium discoideum OX=44689 GN=gtaN PE=4 SV=1	adhesive plaque matrix protein-like [Spodoptera litura]
TRINITY_DN18522_c0_g1	16.8121	90.9589	2.44383	0.00011498	0.00623926	up	--	--	--	--|6e-55|haw:110373347|hypothetical protein	--	--	--	--	uncharacterized protein LOC111348468 [Spodoptera litura]
TRINITY_DN26155_c2_g1	161.473	1931.24	3.58102	0.000154675	0.00771501	up	--	--	--	--	--	--	--	--	uncharacterized protein LOC111356151 [Spodoptera litura]
TRINITY_DN8291_c0_g1	0	23.4059	6.82984	4.3e-05	0.00295938	up	--	--	--	K09396|6e-06|amj:106739939|K09396 FOXC; forkhead box protein C	--	--	--	--	--
TRINITY_DN28028_c1_g1	1107.99	10.8097	-6.67998	4.56e-09	1.5e-06	down	--	--	Molecular Function: structural constituent of cuticle (GO:0042302);;	--|1e-53|haw:110384204|hypothetical protein	--	--	Insect cuticle protein	Endocuticle structural glycoprotein ABD-4 OS=Locusta migratoria OX=7004 PE=1 SV=3	endocuticle structural glycoprotein ABD-4-like [Spodoptera litura]
TRINITY_DN31557_c1_g1	598.007	0.596424	-10.0043	3.23e-08	8.22e-06	down	--	--	Molecular Function: structural constituent of cuticle (GO:0042302);;	--|2e-63|haw:110376229|hypothetical protein	--	--	--	Pupal cuticle protein 36 OS=Manduca sexta OX=7130 GN=PCP36 PE=1 SV=1	uncharacterized protein LOC111349432 [Spodoptera litura]
TRINITY_DN27219_c0_g1	1213.41	363.061	-1.74055	1.69e-06	0.000223112	down	[I]	Lipid transport and metabolism	Biological Process: phospholipid biosynthetic process (GO:0008654);; Cellular Component: integral component of membrane (GO:0016021);; Molecular Function: phosphotransferase activity, for other substituted phosphate groups (GO:0016780);;	K00993|0.0|haw:110379934|K00993 EPT1; ethanolaminephosphotransferase [EC:2.7.8.1]	[I]	Lipid transport and metabolism	CDP-alcohol phosphatidyltransferase	Uncharacterized CDP-alcohol phosphatidyltransferase class-I family protein 3 OS=Dictyostelium discoideum OX=44689 GN=captC PE=2 SV=1	ethanolaminephosphotransferase 1-like isoform X1 [Spodoptera litura]
TRINITY_DN27846_c5_g1	0.728413	15.7061	4.4167	0.00137356	0.0374387	up	[I]	Lipid transport and metabolism	Molecular Function: acyl-CoA dehydrogenase activity (GO:0003995);; Molecular Function: acyl-CoA oxidase activity (GO:0003997);; Cellular Component: peroxisome (GO:0005777);; Biological Process: generation of precursor metabolites and energy (GO:0006091);; Biological Process: lipid metabolic process (GO:0006629);; Biological Process: fatty acid beta-oxidation (GO:0006635);; Biological Process: pro…	K00232|9e-69|haw:110380004|K00232 E1.3.3.6; acyl-CoA oxidase [EC:1.3.3.6]	[I]	Lipid transport and metabolism	Acyl-CoA oxidase	Probable peroxisomal acyl-coenzyme A oxidase 1 OS=Drosophila melanogaster OX=7227 GN=CG5009 PE=1 SV=1	probable peroxisomal acyl-coenzyme A oxidase 1 isoform X1 [Spodoptera litura]
TRINITY_DN20504_c4_g1	32054.4	1367.91	-4.55052	9.87e-05	0.00562457	down	--	--	Molecular Function: tyrosine 3-monooxygenase activity (GO:0004511);; Molecular Function: iron ion binding (GO:0005506);; Biological Process: catecholamine metabolic process (GO:0006584);; Biological Process: courtship behavior (GO:0007619);; Biological Process: male courtship behavior (GO:0008049);; Biological Process: adult locomotory behavior (GO:0008344);; Biological Process: aromatic amino ac…	K00501|0.0|haw:110377808|K00501 TH; tyrosine 3-monooxygenase [EC:1.14.16.2]	[E]	Amino acid transport and metabolism	Biopterin-dependent aromatic amino acid hydroxylase;; Biopterin-dependent aromatic amino acid hydroxylase	Tyrosine 3-monooxygenase OS=Drosophila melanogaster OX=7227 GN=ple PE=2 SV=2	tyrosine hydroxylase [Spodoptera exigua]
TRINITY_DN29708_c1_g2	2567.78	56.5281	-5.50613	4.92e-08	1.2e-05	down	[Q]	Secondary metabolites biosynthesis, transport and catabolism	Molecular Function: monooxygenase activity (GO:0004497);; Molecular Function: iron ion binding (GO:0005506);; Cellular Component: endoplasmic reticulum membrane (GO:0005789);; Molecular Function: oxidoreductase activity, acting on paired donors, with incorporation or reduction of molecular oxygen (GO:0016705);; Molecular Function: heme binding (GO:0020037);; Cellular Component: organelle membrane…	K17960|0.0|haw:110376697|K17960 CYP49A; cytochrome P450 family 49 subfamily A	[Q]	Secondary metabolites biosynthesis, transport and catabolism	Cytochrome P450	Probable cytochrome P450 49a1 OS=Drosophila melanogaster OX=7227 GN=Cyp49a1 PE=2 SV=3	probable cytochrome P450 49a1 [Spodoptera litura]
TRINITY_DN24702_c0_g1	26376.9	747.023	-5.14183	2.96e-24	1.29e-20	down	--	--	Molecular Function: structural constituent of cuticle (GO:0042302);;	--|1e-11|haw:110383613|hypothetical protein	--	--	--	Larval cuticle protein LCP-17 OS=Bombyx mori OX=7091 GN=LCP17 PE=2 SV=1	larval cuticle protein LCP-17-like [Spodoptera litura]
TRINITY_DN29264_c0_g1	465.35	158.338	-1.55647	0.000237081	0.0106137	down	[Z]	Cytoskeleton	--	K20526|3e-58|haw:110378004|K20526 TAGLN; transgelin	[Z]	Cytoskeleton	Calponin family repeat	Myophilin OS=Echinococcus granulosus OX=6210 PE=2 SV=1	myophilin-like [Spodoptera litura]
TRINITY_DN19514_c0_g3	0	20.7894	6.66498	5.34e-05	0.00344987	up	--	--	--	--|8e-22|tnl:113503301|hypothetical protein	--	--	--	--	uncharacterized protein LOC111355283 [Spodoptera litura]
TRINITY_DN17695_c0_g1	844.687	275.205	-1.61698	0.000629191	0.0214766	down	[J]	Translation, ribosomal structure and biogenesis	Molecular Function: structural constituent of ribosome (GO:0003735);; Cellular Component: mitochondrial large ribosomal subunit (GO:0005762);; Biological Process: translation (GO:0006412);;	K02899|1e-88|haw:110378346|K02899 RP-L27; large subunit ribosomal protein L27	[J]	Translation, ribosomal structure and biogenesis	Ribosomal L27 protein	Probable 39S ribosomal protein L27, mitochondrial OS=Dictyostelium discoideum OX=44689 GN=mrpl27 PE=3 SV=1	uncharacterized protein LOC111358493 [Spodoptera litura]
TRINITY_DN16411_c0_g1	23.6668	1.39107	-4.07631	0.000257288	0.01125	down	[E]	Amino acid transport and metabolism	Cellular Component: extracellular region (GO:0005576);; Biological Process: glucose metabolic process (GO:0006006);; Biological Process: pupal chitin-based cuticle development (GO:0008364);; Molecular Function: oxidoreductase activity, acting on CH-OH group of donors (GO:0016614);; Biological Process: sensory perception of pain (GO:0019233);; Biological Process: sperm storage (GO:0046693);; Molec…	--|1e-79|haw:110370881|hypothetical protein	[R]	General function prediction only	GMC oxidoreductase	Glucose dehydrogenase [FAD, quinone] OS=Drosophila melanogaster OX=7227 GN=Gld PE=3 SV=3	glucose dehydrogenase [FAD, quinone]-like isoform X2 [Spodoptera litura]
TRINITY_DN28490_c0_g1	64.6571	212.164	1.71619	0.00122682	0.0344859	up	--	--	--	--|1e-12|haw:110380435|hypothetical protein	--	--	--	--	uncharacterized protein LOC111350198 [Spodoptera litura]
TRINITY_DN17302_c0_g1	968.37	262.067	-1.88492	9.1e-06	0.000875302	down	[J]	Translation, ribosomal structure and biogenesis	Molecular Function: mRNA binding (GO:0003729);; Molecular Function: structural constituent of ribosome (GO:0003735);; Cellular Component: mitochondrion (GO:0005739);; Cellular Component: mitochondrial large ribosomal subunit (GO:0005762);; Biological Process: translation (GO:0006412);; Biological Process: sensory perception of pain (GO:0019233);; Biological Process: mitochondrial translation (GO:…	K02871|1e-127|haw:110371256|K02871 RP-L13; large subunit ribosomal protein L13	[J]	Translation, ribosomal structure and biogenesis	Ribosomal protein L13	39S ribosomal protein L13, mitochondrial OS=Drosophila melanogaster OX=7227 GN=mRpL13 PE=2 SV=2	39S ribosomal protein L13, mitochondrial [Spodoptera litura]
TRINITY_DN24685_c1_g3	11.8205	197.734	4.07816	0.000313302	0.0129825	up	--	--	--	--|2e-17|pxy:105392941|hypothetical protein	--	--	--	Fibroin heavy chain OS=Bombyx mori OX=7091 GN=FIBH PE=1 SV=4	spidroin-1-like [Spodoptera litura]
TRINITY_DN32214_c3_g1	14.6173	111.218	2.93717	0.000141016	0.00726612	up	[Q]	Secondary metabolites biosynthesis, transport and catabolism	Molecular Function: iron ion binding (GO:0005506);; Cellular Component: endoplasmic reticulum membrane (GO:0005789);; Molecular Function: heme binding (GO:0020037);; Cellular Component: organelle membrane (GO:0031090);; Molecular Function: aromatase activity (GO:0070330);;	K14999|0.0|haw:110384246|K14999 CYP6; cytochrome P450 family 6 [EC:1.14.-.-]	[Q]	Secondary metabolites biosynthesis, transport and catabolism	Cytochrome P450	Cytochrome P450 6B2 OS=Helicoverpa armigera OX=29058 GN=CYP6B2 PE=2 SV=1	cytochrome P450 6B2-like [Spodoptera litura]
TRINITY_DN24716_c3_g1	6004.71	916.159	-2.71233	0.00116585	0.0332133	down	--	--	Molecular Function: retinoid binding (GO:0005501);; Biological Process: visual perception (GO:0007601);; Biological Process: phototransduction (GO:0007602);; Biological Process: rhodopsin biosynthetic process (GO:0016063);; Molecular Function: retinal binding (GO:0016918);; Molecular Function: retinol binding (GO:0019841);;	--|1e-156|haw:110373841|hypothetical protein	[I]	Lipid transport and metabolism	CRAL/TRIO domain	Retinol-binding protein pinta OS=Drosophila melanogaster OX=7227 GN=pinta PE=2 SV=1	alpha-tocopherol transfer protein-like [Spodoptera litura]
TRINITY_DN31677_c1_g2	26.0473	148.583	2.52407	1.26e-07	2.56e-05	up	--	--	Biological Process: establishment of mitotic spindle orientation (GO:0000132);; Biological Process: phagolysosome assembly (GO:0001845);; Cellular Component: phagocytic cup (GO:0001891);; Molecular Function: scavenger receptor activity (GO:0005044);; Cellular Component: plasma membrane (GO:0005886);; Biological Process: apoptotic process (GO:0006915);; Cellular Component: cell surface (GO:0009986…	--|0.0|haw:110378298|hypothetical protein	[T]	Signal transduction mechanisms	Trypsin Inhibitor like cysteine rich domain;; Ribosomal protein L33	Cell death abnormality protein 1 OS=Caenorhabditis elegans OX=6239 GN=ced-1 PE=1 SV=1	zonadhesin-like [Spodoptera litura]
TRINITY_DN22228_c0_g1	310.518	126.801	-1.2904	0.00119577	0.0339225	down	[J]	Translation, ribosomal structure and biogenesis	Cellular Component: nucleus (GO:0005634);; Molecular Function: tRNA (adenine-N1-)-methyltransferase activity (GO:0016429);; Biological Process: tRNA methylation (GO:0030488);; Cellular Component: tRNA (m1A) methyltransferase complex (GO:0031515);;	K07442|0.0|haw:110376244|K07442 TRM61; tRNA (adenine57-N1/adenine58-N1)-methyltransferase catalytic subunit [EC:2.1.1.219 2.1.1.220]	[J]	Translation, ribosomal structure and biogenesis	tRNA methyltransferase complex GCD14 subunit;; Methyltransferase domain	tRNA (adenine(58)-N(1))-methyltransferase catalytic subunit trmt61a OS=Dictyostelium discoideum OX=44689 GN=trmt61a PE=1 SV=1	tRNA (adenine(58)-N(1))-methyltransferase catalytic subunit TRMT61A [Spodoptera litura]
TRINITY_DN29637_c1_g2	6639.13	2859.03	-1.21537	0.00208265	0.0490888	down	[G]	Carbohydrate transport and metabolism	Cellular Component: endoplasmic reticulum (GO:0005783);; Cellular Component: Golgi apparatus (GO:0005794);; Biological Process: carbohydrate metabolic process (GO:0005975);; Biological Process: N-glycan processing (GO:0006491);; Molecular Function: carbohydrate binding (GO:0030246);; Biological Process: sorocarp morphogenesis (GO:0031288);; Molecular Function: glucan 1,3-alpha-glucosidase activit…	K05546|0.0|tnl:113505102|K05546 GANAB; mannosyl-oligosaccharide alpha-1,3-glucosidase [EC:3.2.1.207]	[GMO]	--	Glycosyl hydrolases family 31;; Domain of unknown function (DUF5110)	Neutral alpha-glucosidase AB OS=Dictyostelium discoideum OX=44689 GN=modA PE=3 SV=1	glucosidase II alpha-subunit [Spodoptera frugiperda]
TRINITY_DN26251_c1_g1	591.354	62.413	-3.24395	9.42e-05	0.00549938	down	[M]	Cell wall/membrane/envelope biogenesis	Molecular Function: DNA binding (GO:0003677);;	--|2e-42|haw:110370484|hypothetical protein	[K]	Transcription	--	Uncharacterized proline-rich protein (Fragment) OS=Owenia fusiformis OX=6347 PE=4 SV=1	proline-rich extensin-like protein EPR1 [Spodoptera litura]
TRINITY_DN25145_c1_g1	3981.88	565.277	-2.81634	0.00157296	0.0408803	down	[ER]	--	Molecular Function: 4-hydroxyphenylpyruvate dioxygenase activity (GO:0003868);; Biological Process: L-phenylalanine catabolic process (GO:0006559);; Biological Process: tyrosine catabolic process (GO:0006572);; Cellular Component: phagocytic vesicle (GO:0045335);; Molecular Function: metal ion binding (GO:0046872);;	K00457|1e-104|haw:110372257|K00457 HPD; 4-hydroxyphenylpyruvate dioxygenase [EC:1.13.11.27]	[E]	Amino acid transport and metabolism	Glyoxalase/Bleomycin resistance protein/Dioxygenase superfamily	4-hydroxyphenylpyruvate dioxygenase OS=Dictyostelium discoideum OX=44689 GN=hpd PE=1 SV=1	4-hydroxyphenylpyruvate dioxygenase-like [Spodoptera litura]
TRINITY_DN28515_c0_g1	483.301	152.872	-1.65949	5.66e-05	0.00364033	down	[J]	Translation, ribosomal structure and biogenesis	Molecular Function: translation initiation factor activity (GO:0003743);; Molecular Function: GTPase activity (GO:0003924);; Molecular Function: GTP binding (GO:0005525);; Cellular Component: cytoplasm (GO:0005737);; Biological Process: translational initiation (GO:0006413);; Biological Process: regulation of translational initiation (GO:0006446);; Molecular Function: metal ion binding (GO:004687…	K02519|0.0|haw:110372490|K02519 infB; translation initiation factor IF-2	[J]	Translation, ribosomal structure and biogenesis	Elongation factor Tu GTP binding domain;; Translation-initiation factor 2;; 50S ribosome-binding GTPase;; Ferrous iron transport protein B;; ADP-ribosylation factor family;; Ethanolamine utilisation - propanediol utilisation	Eukaryotic translation initiation factor 5B OS=Dictyostelium discoideum OX=44689 GN=eif5b PE=3 SV=1	translation initiation factor IF-2, mitochondrial-like [Spodoptera litura]
TRINITY_DN31973_c3_g1	931.663	28.1266	-5.05144	1.35e-13	1.11e-10	down	--	--	Molecular Function: structural constituent of cuticle (GO:0042302);;	--|5e-98|haw:110384201|hypothetical protein	--	--	Insect cuticle protein	Endocuticle structural glycoprotein SgAbd-8 OS=Schistocerca gregaria OX=7010 PE=1 SV=1	endocuticle structural glycoprotein ABD-4-like [Spodoptera litura]
TRINITY_DN24378_c0_g1	10121	2243.91	-2.17317	2.82e-05	0.00213887	down	[J]	Translation, ribosomal structure and biogenesis	Molecular Function: translation elongation factor activity (GO:0003746);; Molecular Function: GTPase activity (GO:0003924);; Molecular Function: GTP binding (GO:0005525);; Cellular Component: mitochondrion (GO:0005739);;	K02358|0.0|haw:110372574|K02358 tuf; elongation factor Tu	[J]	Translation, ribosomal structure and biogenesis	Elongation factor Tu GTP binding domain;; Elongation factor Tu domain 2;; Elongation factor Tu C-terminal domain	Elongation factor Tu, mitochondrial OS=Reclinomonas americana OX=48483 GN=TUFA PE=3 SV=1	uncharacterized protein LOC111351962 [Spodoptera litura]
TRINITY_DN14443_c0_g1	831.411	246.408	-1.75366	0.000170357	0.00831522	down	[J]	Translation, ribosomal structure and biogenesis	Molecular Function: structural constituent of ribosome (GO:0003735);; Cellular Component: mitochondrial large ribosomal subunit (GO:0005762);; Biological Process: mitochondrial translation (GO:0032543);;	K02914|3e-49|haw:110370360|K02914 RP-L34; large subunit ribosomal protein L34	[J]	Translation, ribosomal structure and biogenesis	Ribosomal protein L34	39S ribosomal protein L34, mitochondrial OS=Drosophila melanogaster OX=7227 GN=mRpL34 PE=3 SV=1	39S ribosomal protein L34, mitochondrial [Helicoverpa armigera]
TRINITY_DN30406_c0_g1	26.8147	115.003	2.09107	0.000918755	0.0280339	up	--	--	Cellular Component: extracellular region (GO:0005576);; Biological Process: nervous system development (GO:0007399);; Biological Process: cell differentiation (GO:0030154);;	--|0.0|haw:110384536|hypothetical protein	[T]	Signal transduction mechanisms	Sema domain	Semaphorin-2A OS=Schistocerca gregaria OX=7010 GN=SEMA-2A PE=2 SV=1	semaphorin-2A isoform X1 [Spodoptera litura]
TRINITY_DN26121_c0_g1	314.857	2.2786	-7.11157	5.02e-07	8.22e-05	down	--	--	Cellular Component: extracellular space (GO:0005615);; Molecular Function: nutrient reservoir activity (GO:0045735);;	--|0.0|haw:110380217|hypothetical protein	--	--	Hemocyanin, ig-like domain;; Hemocyanin, copper containing domain;; Hemocyanin, all-alpha domain	Arylphorin subunit alpha OS=Manduca sexta OX=7130 PE=2 SV=1	arylphorin subunit alpha-like [Spodoptera litura]
TRINITY_DN20901_c3_g2	85.9781	3.34907	-4.67684	0.000394634	0.0153441	down	--	--	--	--	--	--	--	--	shematrin-like protein 1 [Spodoptera litura]
TRINITY_DN30645_c0_g2	862.082	354.316	-1.28217	0.000386375	0.0151422	down	--	--	--	--|1e-133|tnl:113494965|hypothetical protein	--	--	--	--	uncharacterized protein LOC111349656 [Spodoptera litura]
TRINITY_DN30977_c1_g1	1566.03	104.701	-3.90397	0.000547836	0.019346	down	--	--	Biological Process: lipid transport (GO:0006869);; Biological Process: multicellular organism development (GO:0007275);; Molecular Function: lipid binding (GO:0008289);; Cellular Component: integral component of membrane (GO:0016021);; Molecular Function: transferase activity, transferring acyl groups other than amino-acyl groups (GO:0016747);;	--|0.0|haw:110371133|hypothetical protein	[R]	General function prediction only	Acyltransferase family	Nose resistant to fluoxetine protein 6 OS=Caenorhabditis elegans OX=6239 GN=nrf-6 PE=1 SV=3	O-acyltransferase like protein-like [Helicoverpa armigera]
TRINITY_DN28691_c2_g1	8.71667	105.516	3.59133	8.02e-06	0.000787098	up	--	--	--	K05768|6e-10|tnl:113509027|K05768 GSN; gelsolin	--	--	--	--	gelsolin-like [Spodoptera litura]
TRINITY_DN21617_c5_g1	0.364207	15.2465	5.2569	0.000873889	0.0269704	up	--	--	--	--|6e-45|bmor:101740820|hypothetical protein	[R]	General function prediction only	Endonuclease-reverse transcriptase	--	uncharacterized protein LOC111349834 [Spodoptera litura]
TRINITY_DN18855_c1_g1	5809.66	1458.33	-1.99398	2.94e-06	0.000349702	down	[O]	Posttranslational modification, protein turnover, chaperones	Cellular Component: cytoplasm (GO:0005737);; Cellular Component: mitochondrion (GO:0005739);; Cellular Component: lipid droplet (GO:0005811);; Cellular Component: microtubule associated complex (GO:0005875);; Biological Process: multicellular organism development (GO:0007275);; Cellular Component: membrane (GO:0016020);; Biological Process: sensory perception of pain (GO:0019233);; Biological Pro…	K17080|1e-121|haw:110371093|K17080 PHB1; prohibitin 1	[O]	Posttranslational modification, protein turnover, chaperones	SPFH domain / Band 7 family	Protein l(2)37Cc OS=Drosophila melanogaster OX=7227 GN=l(2)37Cc PE=2 SV=2	protein l(2)37Cc [Helicoverpa armigera]
TRINITY_DN33793_c0_g1	21.3777	0	-7.08373	0.00156167	0.0407247	down	--	--	Molecular Function: structural constituent of cuticle (GO:0042302);;	--|5e-48|tnl:113496437|hypothetical protein	--	--	--	Pupal cuticle protein G1A OS=Tenebrio molitor OX=7067 PE=1 SV=1	uncharacterized protein LOC111356231 [Spodoptera litura]
TRINITY_DN3369_c0_g1	481.033	1.76961	-8.10913	6.5e-12	4.59e-09	down	[G]	Carbohydrate transport and metabolism	Molecular Function: nucleotide binding (GO:0000166);; Molecular Function: RNA binding (GO:0003723);; Cellular Component: nucleus (GO:0005634);; Cellular Component: ribonucleoprotein complex (GO:0030529);;	--|4e-30|der:6550147|hypothetical protein	--	--	--	Heterogeneous nuclear ribonucleoprotein A1, A2/B1 homolog OS=Schistocerca americana OX=7009 GN=HNRNP PE=2 SV=1	heterogeneous nuclear ribonucleoprotein A1, A2/B1 homolog [Spodoptera litura]
TRINITY_DN25334_c0_g1	791.24	223.627	-1.82299	0.000338097	0.0137033	down	[S]	Function unknown	Molecular Function: type II transforming growth factor beta receptor binding (GO:0005114);; Cellular Component: integral component of plasma membrane (GO:0005887);; Biological Process: transforming growth factor beta receptor signaling pathway (GO:0007179);; Biological Process: positive regulation of transforming growth factor beta receptor signaling pathway (GO:0030511);; Cellular Component: cyt…	--|0.0|haw:110383787|hypothetical protein	[R]	General function prediction only	Leucine rich repeat;; Leucine Rich repeats (2 copies);; Leucine Rich repeat;; Leucine Rich Repeat	Leucine-rich repeats and immunoglobulin-like domains protein sma-10 OS=Caenorhabditis elegans OX=6239 GN=sma-10 PE=1 SV=1	uncharacterized protein LOC111352888 [Spodoptera litura]
TRINITY_DN31942_c0_g1	1428.73	4548.75	1.67045	0.00174542	0.0434126	up	--	--	Cellular Component: nucleus (GO:0005634);; Biological Process: rhythmic process (GO:0048511);;	K02633|0.0|haw:110374515|K02633 PER2; period circadian protein 2	[T]	Signal transduction mechanisms	PAS fold;; PAS domain;; PAS fold;; Period protein 2/3C-terminal region;; PAS fold	Period circadian protein (Fragment) OS=Manduca sexta OX=7130 GN=per PE=2 SV=1	period circadian protein isoform X14 [Spodoptera litura]
TRINITY_DN20602_c0_g2	1.17356	68.3776	5.7304	0.000160316	0.00792961	up	--	--	Cellular Component: extracellular region (GO:0005576);;	--|3e-06|etl:114071931|hypothetical protein	[GO]	--	--	Uncharacterized protein DDB_G0271670 OS=Dictyostelium discoideum OX=44689 GN=DDB_G0271670 PE=3 SV=1	titin-like isoform X1 [Spodoptera litura]
TRINITY_DN28381_c1_g1	32.6976	140.378	2.10607	0.000867465	0.0268841	up	[GEPR]	--	Cellular Component: integral component of membrane (GO:0016021);; Molecular Function: transmembrane transporter activity (GO:0022891);;	--|0.0|haw:110374403|hypothetical protein	[R]	General function prediction only	Major Facilitator Superfamily;; Sugar (and other) transporter	Putative transporter svop-1 OS=Caenorhabditis elegans OX=6239 GN=svop-1 PE=3 SV=5	hypothetical protein B5V51_9901 [Heliothis virescens]
TRINITY_DN20259_c0_g1	858.184	261.831	-1.7116	0.00010383	0.00582631	down	--	--	Molecular Function: structural constituent of ribosome (GO:0003735);; Cellular Component: mitochondrial small ribosomal subunit (GO:0005763);; Biological Process: translation (GO:0006412);; Biological Process: mitochondrial translation (GO:0032543);;	K17405|1e-115|tnl:113502144|K17405 MRPS26; small subunit ribosomal protein S26	[S]	Function unknown	Mitochondrial ribosome subunit S26	Probable 28S ribosomal protein S26, mitochondrial OS=Drosophila melanogaster OX=7227 GN=mRpS26 PE=2 SV=1	probable 28S ribosomal protein S26, mitochondrial [Spodoptera litura]
TRINITY_DN28514_c1_g1	1.46695	253.739	7.22122	3.3e-14	3.05e-11	up	--	--	--	--|5e-42|mde:101890544|hypothetical protein	--	--	--	Fibroin heavy chain OS=Bombyx mori OX=7091 GN=FIBH PE=1 SV=4	PREDICTED: fibroin heavy chain-like isoform X18 [Tetranychus urticae]
TRINITY_DN29718_c0_g1	6.50765	34.3953	2.39994	0.000531579	0.0189298	up	--	--	Biological Process: multicellular organism development (GO:0007275);; Molecular Function: Hsp70 protein binding (GO:0030544);;	--|2e-07|pmac:106708032|hypothetical protein	--	--	--	BAG domain-containing protein Samui OS=Bombyx mori OX=7091 GN=Samui PE=2 SV=1	unknown unsecreted protein, partial [Papilio polytes]
TRINITY_DN19507_c1_g2	6912.67	2633.8	-1.39207	7.32e-05	0.0045098	down	--	--	Molecular Function: arginine kinase activity (GO:0004054);; Molecular Function: ATP binding (GO:0005524);;	K00934|1e-101|haw:110372888|K00934 E2.7.3.3; arginine kinase [EC:2.7.3.3]	[C]	Energy production and conversion	ATP:guanido phosphotransferase, C-terminal catalytic domain	Arginine kinase OS=Plodia interpunctella OX=58824 GN=ARGK PE=1 SV=1	arginine kinase, partial [Epicephala sp. F AK-2014]
TRINITY_DN23556_c1_g1	221.595	44.7946	-2.30875	0.0010253	0.0303014	down	--	--	Molecular Function: scavenger receptor activity (GO:0005044);; Biological Process: phagocytosis (GO:0006909);; Cellular Component: integral component of membrane (GO:0016021);; Cellular Component: cytoplasmic vesicle membrane (GO:0030659);; Biological Process: innate immune response (GO:0045087);;	K00280|0.0|haw:110373610|K00280 LOXL2_3_4; lysyl oxidase-like protein 2/3/4 [EC:1.4.3.-]	--	--	Lysyl oxidase;; Scavenger receptor cysteine-rich domain	Scavenger receptor cysteine-rich domain superfamily protein OS=Patiria pectinifera OX=7594 GN=SRCR1 PE=1 SV=1	lysyl oxidase homolog 3A [Spodoptera litura]
TRINITY_DN22053_c1_g2	163.468	9.2696	-4.14331	0.000270604	0.0116793	down	[P]	Inorganic ion transport and metabolism	--	--|1e-25|tnl:113500686|hypothetical protein	[R]	General function prediction only	Sulfatase	--	arylsulfatase J-like [Spodoptera litura]
TRINITY_DN24815_c0_g1	4381.3	21.6649	-7.66177	6.98e-19	1.38e-15	down	[E]	Amino acid transport and metabolism	Molecular Function: glutamate decarboxylase activity (GO:0004351);; Cellular Component: cytosol (GO:0005829);; Biological Process: glutamate catabolic process (GO:0006538);; Biological Process: synapse assembly (GO:0007416);; Biological Process: neuromuscular junction development (GO:0007528);; Biological Process: larval locomotory behavior (GO:0008345);; Biological Process: olfactory learning (G…	--|0.0|haw:110370221|hypothetical protein	[E]	Amino acid transport and metabolism	Pyridoxal-dependent decarboxylase conserved domain;; Beta-eliminating lyase	Glutamate decarboxylase OS=Drosophila melanogaster OX=7227 GN=Gad1 PE=2 SV=2	cysteine sulfinic acid decarboxylase [Spodoptera litura]
TRINITY_DN23956_c0_g1	292.719	25.2172	-3.53411	0.000200407	0.0094851	down	[E]	Amino acid transport and metabolism	Cellular Component: extracellular region (GO:0005576);; Biological Process: glucose metabolic process (GO:0006006);; Biological Process: pupal chitin-based cuticle development (GO:0008364);; Molecular Function: oxidoreductase activity, acting on CH-OH group of donors (GO:0016614);; Biological Process: sensory perception of pain (GO:0019233);; Biological Process: sperm storage (GO:0046693);; Molec…	--|0.0|haw:110370926|hypothetical protein	[R]	General function prediction only	GMC oxidoreductase;; GMC oxidoreductase	Glucose dehydrogenase [FAD, quinone] OS=Drosophila melanogaster OX=7227 GN=Gld PE=3 SV=3	glucose dehydrogenase [FAD, quinone]-like [Spodoptera litura]
TRINITY_DN23753_c1_g1	597.53	76.7093	-2.96145	1.84e-05	0.00151752	down	--	--	--	--|3e-66|tnl:113497530|hypothetical protein	--	--	--	--	uncharacterized protein LOC111362666 isoform X2 [Spodoptera litura]
TRINITY_DN28772_c5_g1	2.43108	221.11	6.48106	2.8e-10	1.32e-07	up	--	--	Molecular Function: calcium channel activity (GO:0005262);; Cellular Component: cilium (GO:0005929);; Biological Process: mating behavior (GO:0007617);; Cellular Component: membrane (GO:0016020);; Cellular Component: integral component of membrane (GO:0016021);; Molecular Function: protein domain specific binding (GO:0019904);; Biological Process: response to hermaphrodite contact (GO:0034606);; …	--|6e-41|haw:110380133|hypothetical protein	--	--	--	Location of vulva defective 1 OS=Caenorhabditis elegans OX=6239 GN=lov-1 PE=1 SV=4	uncharacterized protein LOC111359756 [Spodoptera litura]
TRINITY_DN30428_c1_g3	316.72	123.905	-1.35286	0.000306418	0.01281	down	--	--	Molecular Function: monophenol monooxygenase activity (GO:0004503);; Cellular Component: extracellular region (GO:0005576);; Biological Process: melanin biosynthetic process from tyrosine (GO:0006583);; Biological Process: defense response (GO:0006952);; Molecular Function: metal ion binding (GO:0046872);;	--|3e-17|tnl:113506543|hypothetical protein	--	--	--	Phenoloxidase subunit 2 OS=Bombyx mori OX=7091 PE=1 SV=2	phenoloxidase subunit 2-like [Spodoptera litura]
TRINITY_DN26272_c1_g1	96.9657	412.532	2.09095	0.00022764	0.0103061	up	--	--	Molecular Function: monooxygenase activity (GO:0004497);; Molecular Function: iron ion binding (GO:0005506);; Cellular Component: endoplasmic reticulum membrane (GO:0005789);; Molecular Function: oxidoreductase activity, acting on paired donors, with incorporation or reduction of molecular oxygen (GO:0016705);; Molecular Function: heme binding (GO:0020037);; Cellular Component: organelle membrane…	K15003|4e-67|haw:110378477|K15003 CYP9; cytochrome P450 family 9 [EC:1.14.-.-]	[Q]	Secondary metabolites biosynthesis, transport and catabolism	Cytochrome P450;; Cytochrome P450	Cytochrome P450 9e2 OS=Blattella germanica OX=6973 GN=CYP9E2 PE=2 SV=1	cytochrome P450 9A59 [Spodoptera frugiperda]
TRINITY_DN31553_c1_g2	380.517	29.2646	-3.70299	0.00138862	0.0376552	down	[Q]	Secondary metabolites biosynthesis, transport and catabolism	Cellular Component: peroxisome (GO:0005777);; Cellular Component: peroxisomal membrane (GO:0005778);; Biological Process: ether lipid biosynthetic process (GO:0008611);; Biological Process: wax biosynthetic process (GO:0010025);; Cellular Component: integral component of membrane (GO:0016021);; Molecular Function: long-chain-fatty-acyl-CoA reductase activity (GO:0050062);; Molecular Function: fat…	K13356|1e-165|haw:110381393|K13356 FAR; alcohol-forming fatty acyl-CoA reductase [EC:1.2.1.84]	[I]	Lipid transport and metabolism	Male sterility protein;; NAD dependent epimerase/dehydratase family;; Polysaccharide biosynthesis protein;; GDP-mannose 4,6 dehydratase;; 3-beta hydroxysteroid dehydrogenase/isomerase family	Putative fatty acyl-CoA reductase CG5065 OS=Drosophila melanogaster OX=7227 GN=CG5065 PE=3 SV=1	putative fatty acyl-CoA reductase CG5065 [Spodoptera litura]
TRINITY_DN26695_c0_g1	496.013	148.834	-1.73627	3.9e-06	0.000440628	down	--	--	Cellular Component: extracellular region (GO:0005576);;	--|0.0|haw:110377226|hypothetical protein	--	--	Lepidopteran low molecular weight (30 kD) lipoprotein	Microvitellogenin OS=Manduca sexta OX=7130 GN=MVG PE=2 SV=1	microvitellogenin-like [Spodoptera litura]
TRINITY_DN17808_c0_g1	868.868	213.207	-2.02584	1.42e-05	0.00124522	down	--	--	--	K17407|4e-90|haw:110378943|K17407 MRPS28; small subunit ribosomal protein S28	[J]	Translation, ribosomal structure and biogenesis	Mitochondrial ribosomal protein MRP-S35	--	28S ribosomal protein S28, mitochondrial [Spodoptera litura]
TRINITY_DN18391_c0_g1	11.2257	78.9378	2.7857	0.000660216	0.0220529	up	--	--	--	--	--	--	--	--	hypothetical protein B5V51_12871 [Heliothis virescens]
TRINITY_DN28086_c0_g1	106.207	239.655	1.17394	0.00171744	0.0431224	up	--	--	--	--|6e-46|haw:110372198|hypothetical protein	--	--	--	--	uncharacterized protein LOC111356805 [Spodoptera litura]
TRINITY_DN28807_c1_g2	0	8.80627	5.42613	0.00186415	0.0453085	up	--	--	--	--|3e-12|haw:110378467|hypothetical protein	--	--	--	--	organic cation transporter protein-like [Spodoptera litura]
TRINITY_DN30841_c0_g1	5.18996	38.0693	2.81775	0.00184374	0.044997	up	--	--	Molecular Function: obsolete signal transducer, downstream of receptor, with serine/threonine kinase activity (GO:0004702);; Molecular Function: ATP binding (GO:0005524);; Cellular Component: cytoplasm (GO:0005737);;	--|1e-89|tnl:113500703|hypothetical protein	--	--	--	Probable serine/threonine-protein kinase nek3 OS=Dictyostelium discoideum OX=44689 GN=nek3 PE=3 SV=1	hypothetical protein B5V51_4443 [Heliothis virescens]
TRINITY_DN24685_c1_g2	2.32636	79.8597	5.14717	2.74e-06	0.000330243	up	[J]	Translation, ribosomal structure and biogenesis	Cellular Component: extracellular space (GO:0005615);;	--|1e-15|amex:111195488|hypothetical protein	--	--	--	Spidroin-1 (Fragment) OS=Nephila clavipes OX=6915 PE=1 SV=3	spidroin-1-like [Spodoptera litura]
TRINITY_DN22745_c1_g6	0.728413	24.9124	5.08341	0.000100374	0.00568617	up	--	--	--	--	--	--	--	--	glycine-rich cell wall structural protein-like [Spodoptera litura]
TRINITY_DN30215_c1_g6	1052.32	305.931	-1.78182	0.00016636	0.00815687	down	[J]	Translation, ribosomal structure and biogenesis	--	K02926|0.0|haw:110384420|K02926 RP-L4; large subunit ribosomal protein L4	[J]	Translation, ribosomal structure and biogenesis	Ribosomal protein L4/L1 family	--	39S ribosomal protein L4, mitochondrial [Spodoptera litura]
TRINITY_DN23148_c0_g1	1900.7	749.985	-1.34167	0.000348607	0.0140143	down	--	--	--	K00802|3e-68|haw:110374554|K00802 SMS; spermine synthase [EC:2.5.1.22]	[G]	Carbohydrate transport and metabolism	--	K13783|0.0|tnl:113498866|K13783 SLC37A1_2; MFS transporter, OPA family, solute carrier family 37 (glycerol-3-phosphate transporter), member 1/2	[G]	Carbohydrate transport and metabolism	Major Facilitator Superfamily	--	glucose-6-phosphate exchanger SLC37A2 [Spodoptera litura]
TRINITY_DN21229_c4_g1	1863.07	493.575	-1.91592	6.94e-06	0.000689609	down	[J]	Translation, ribosomal structure and biogenesis	Molecular Function: structural constituent of ribosome (GO:0003735);; Cellular Component: mitochondrial large ribosomal subunit (GO:0005762);; Biological Process: translation (GO:0006412);; Biological Process: sensory perception of pain (GO:0019233);;	K02895|1e-169|tnl:113503156|K02895 RP-L24; large subunit ribosomal protein L24	[J]	Translation, ribosomal structure and biogenesis	Ribosomal proteins 50S L24/mitochondrial 39S L24;; KOW motif	Probable 39S ribosomal protein L24, mitochondrial OS=Drosophila pseudoobscura pseudoobscura OX=46245 GN=mRpL24 PE=3 SV=1	probable 39S ribosomal protein L24, mitochondrial [Spodoptera litura]
TRINITY_DN27417_c0_g1	2.50189	35.0087	3.79922	0.000132666	0.00692441	up	--	--	Cellular Component: extracellular region (GO:0005576);; Molecular Function: phosphatidylcholine 1-acylhydrolase activity (GO:0008970);; Biological Process: lipid catabolic process (GO:0016042);; Biological Process: hemolysis in other organism (GO:0044179);; Molecular Function: phosphatidylserine 1-acylhydrolase activity (GO:0052739);; Molecular Function: 1-acyl-2-lysophosphatidylserine acylhydrol…	--|8e-82|haw:110376664|hypothetical protein	--	--	Lipase	Phospholipase A1 OS=Vespula squamosa OX=30214 PE=1 SV=1	pancreatic triacylglycerol lipase-like [Spodoptera litura]
TRINITY_DN17502_c0_g1	593.577	202.132	-1.55371	0.00134613	0.0368266	down	--	--	Molecular Function: RNA binding (GO:0003723);; Molecular Function: structural constituent of ribosome (GO:0003735);; Cellular Component: mitochondrial small ribosomal subunit (GO:0005763);; Biological Process: mitochondrial translation (GO:0032543);;	K02961|1e-111|tnl:113504861|K02961 RP-S17; small subunit ribosomal protein S17	[J]	Translation, ribosomal structure and biogenesis	Ribosomal protein S17	28S ribosomal protein S17, mitochondrial OS=Caenorhabditis elegans OX=6239 GN=mrps-17 PE=3 SV=2	28S ribosomal protein S17, mitochondrial [Spodoptera litura]
TRINITY_DN14483_c0_g1	848.079	273.841	-1.62998	0.00175981	0.043668	down	--	--	--	--|3e-76|tnl:113505035|hypothetical protein	[S]	Function unknown	CHCH domain	--	uncharacterized protein LOC111348101 [Spodoptera litura]
TRINITY_DN23674_c1_g3	1.92825	120.269	6.09653	3.72e-05	0.00267294	up	[Q]	Secondary metabolites biosynthesis, transport and catabolism	Molecular Function: monooxygenase activity (GO:0004497);; Molecular Function: iron ion binding (GO:0005506);; Cellular Component: endoplasmic reticulum membrane (GO:0005789);; Molecular Function: oxidoreductase activity, acting on paired donors, with incorporation or reduction of molecular oxygen (GO:0016705);; Molecular Function: heme binding (GO:0020037);; Cellular Component: organelle membrane…	K15003|4e-49|bmor:100126178|K15003 CYP9; cytochrome P450 family 9 [EC:1.14.-.-]	[Q]	Secondary metabolites biosynthesis, transport and catabolism	Cytochrome P450;; Cytochrome P450	Cytochrome P450 9e2 OS=Blattella germanica OX=6973 GN=CYP9E2 PE=2 SV=1	cytochrome p450 CYP9A10 [Spodoptera exigua]
TRINITY_DN30101_c0_g1	473.392	62.4394	-2.92133	0.00014737	0.00746909	down	[I]	Lipid transport and metabolism	Biological Process: lipid transport (GO:0006869);; Biological Process: multicellular organism development (GO:0007275);; Molecular Function: lipid binding (GO:0008289);; Cellular Component: integral component of membrane (GO:0016021);; Molecular Function: transferase activity, transferring acyl groups other than amino-acyl groups (GO:0016747);;	--|0.0|haw:110371003|hypothetical protein	[R]	General function prediction only	Acyltransferase family	Nose resistant to fluoxetine protein 6 OS=Caenorhabditis elegans OX=6239 GN=nrf-6 PE=1 SV=3	nose resistant to fluoxetine protein 6-like [Spodoptera litura]
TRINITY_DN20672_c1_g1	0	48.8852	7.89361	3.27e-08	8.22e-06	up	--	--	--	--|2e-17|tnl:113498281|hypothetical protein	--	--	Moricin	--	moricin B3 [Bombyx mandarina]
TRINITY_DN25745_c0_g1	49.2548	176.551	1.83755	0.000165758	0.00814439	up	[C]	Energy production and conversion	--	--|0.0|haw:110371435|hypothetical protein	[C]	Energy production and conversion	Glycerophosphoryl diester phosphodiesterase family	--	glycerophosphodiester phosphodiesterase GDPD6-like [Spodoptera litura]
TRINITY_DN15460_c0_g1	667.874	190.185	-1.81116	0.00016573	0.00814439	down	--	--	Molecular Function: structural constituent of ribosome (GO:0003735);; Cellular Component: mitochondrion (GO:0005739);; Cellular Component: ribosome (GO:0005840);; Biological Process: translation (GO:0006412);;	K19528|7e-87|haw:110377514|K19528 SYCP3; synaptonemal complex protein 3	--	--	Mitochondrial ribosomal protein S23	Probable 28S ribosomal protein S23, mitochondrial OS=Caenorhabditis elegans OX=6239 GN=mrps-23 PE=3 SV=1	28S ribosomal protein S23, mitochondrial [Spodoptera litura]
TRINITY_DN30989_c0_g1	3773.07	195.587	-4.26979	4.1e-05	0.00286752	down	--	--	Cellular Component: extracellular region (GO:0005576);; Molecular Function: structural constituent of chitin-based larval cuticle (GO:0008010);;	--|2e-51|haw:110370177|hypothetical protein	--	--	--	Larval cuticle protein F1 OS=Tenebrio molitor OX=7067 PE=1 SV=1	hypothetical protein B5V51_1858 [Heliothis virescens]
TRINITY_DN26705_c0_g1	103.15	23.8248	-2.11259	0.00110352	0.0319288	down	[J]	Translation, ribosomal structure and biogenesis	Molecular Function: structural constituent of ribosome (GO:0003735);; Cellular Component: ribosome (GO:0005840);; Biological Process: translation (GO:0006412);; Molecular Function: rRNA binding (GO:0019843);;	K02987|5e-16|pcf:106793284|K02987 RP-S4e; small subunit ribosomal protein S4e	[J]	Translation, ribosomal structure and biogenesis	--	40S ribosomal protein S4 OS=Carabus granulatus OX=118799 GN=RpS4 PE=2 SV=1	40S ribosomal protein S4 [Blattella germanica]
TRINITY_DN24774_c0_g1	1433.65	448.824	-1.67508	0.000325211	0.0132718	down	--	--	Molecular Function: serine-type endopeptidase activity (GO:0004252);; Cellular Component: extracellular space (GO:0005615);; Biological Process: digestion (GO:0007586);;	--|1e-145|haw:110380060|hypothetical protein	[E]	Amino acid transport and metabolism	Trypsin	Trypsin 5G1 OS=Aedes aegypti OX=7159 GN=AAEL013712 PE=2 SV=2	trypsin 5G1-like [Spodoptera litura]
TRINITY_DN30315_c0_g1	764.201	280.92	-1.44332	0.00149616	0.0395081	down	[LKJ]	--	Molecular Function: RNA binding (GO:0003723);; Molecular Function: ATP-dependent RNA helicase activity (GO:0004004);; Molecular Function: ATP binding (GO:0005524);; Cellular Component: chromosome (GO:0005694);; Cellular Component: nucleolus (GO:0005730);; Biological Process: rRNA processing (GO:0006364);; Biological Process: RNA secondary structure unwinding (GO:0010501);;	K13181|0.0|haw:110379152|K13181 DDX27; ATP-dependent RNA helicase DDX27 [EC:3.6.4.13]	[A]	RNA processing and modification	DEAD/DEAH box helicase;; Helicase conserved C-terminal domain;; Type III restriction enzyme, res subunit	Probable ATP-dependent RNA helicase ddx27 OS=Dictyostelium discoideum OX=44689 GN=ddx27 PE=3 SV=1	probable ATP-dependent RNA helicase DDX27 [Spodoptera litura]
TRINITY_DN31732_c1_g1	1181.77	263.274	-2.16651	0.00108167	0.031543	down	--	--	Cellular Component: mitochondrial inner membrane (GO:0005743);; Biological Process: mitochondrial transport (GO:0006839);; Cellular Component: integral component of membrane (GO:0016021);; Molecular Function: transmembrane transporter activity (GO:0022857);;	K15118|8e-80|haw:110376365|K15118 SLC25A38; solute carrier family 25, member 38	[C]	Energy production and conversion	Mitochondrial carrier protein	Uncharacterized mitochondrial carrier C16C10.1 OS=Caenorhabditis elegans OX=6239 GN=C16C10.1 PE=3 SV=2	solute carrier family 25 member 38-like [Spodoptera litura]
TRINITY_DN28613_c0_g1	178.346	871.075	2.29105	0.000642953	0.0216964	up	--	--	--	--|3e-50|haw:110371264|hypothetical protein	--	--	--	--	uncharacterized protein LOC111347839 [Spodoptera litura]
TRINITY_DN17927_c0_g2	800.112	252.889	-1.66085	0.000473461	0.0174474	down	--	--	--	K17431|1e-118|tnl:113508802|K17431 MRPL50; large subunit ribosomal protein L50	--	--	Ribosomal subunit 39S	--	39S ribosomal protein L50, mitochondrial [Spodoptera litura]
TRINITY_DN29785_c1_g2	3177.27	821.358	-1.95151	9.02e-05	0.00533255	down	[Z]	Cytoskeleton	Molecular Function: GTPase activity (GO:0003924);; Molecular Function: structural constituent of cytoskeleton (GO:0005200);; Molecular Function: GTP binding (GO:0005525);; Cellular Component: cytoplasm (GO:0005737);; Cellular Component: microtubule (GO:0005874);; Biological Process: microtubule-based process (GO:0007017);;	K07375|0.0|tnl:113508948|K07375 TUBB; tubulin beta	[Z]	Cytoskeleton	Tubulin/FtsZ family, GTPase domain;; Tubulin C-terminal domain	Tubulin beta-1 chain OS=Manduca sexta OX=7130 PE=2 SV=1	tubulin beta chain-like [Spodoptera litura]
TRINITY_DN24656_c0_g1	338.557	121.814	-1.47409	5.94e-05	0.00378624	down	[J]	Translation, ribosomal structure and biogenesis	Molecular Function: tRNA binding (GO:0000049);; Biological Process: RNA methylation (GO:0001510);; Cellular Component: nucleus (GO:0005634);; Cellular Component: nucleolus (GO:0005730);; Cellular Component: cytoplasm (GO:0005737);; Biological Process: short-term memory (GO:0007614);; Molecular Function: tRNA (cytosine-5-)-methyltransferase activity (GO:0016428);; Biological Process: tRNA methylat…	K21970|0.0|tnl:113499482|K21970 NSUN4; 5-methylcytosine rRNA methyltransferase NSUN4 [EC:2.1.1.-]	[J]	Translation, ribosomal structure and biogenesis	16S rRNA methyltransferase RsmB/F	tRNA (cytosine(34)-C(5))-methyltransferase OS=Drosophila melanogaster OX=7227 GN=Nsun2 PE=2 SV=1	5-methylcytosine rRNA methyltransferase NSUN4 [Spodoptera litura]
TRINITY_DN15109_c0_g1	468.547	109.889	-2.09079	6e-05	0.0037999	down	[G]	Carbohydrate transport and metabolism	Biological Process: polysaccharide catabolic process (GO:0000272);; Molecular Function: chitinase activity (GO:0004568);; Cellular Component: extracellular region (GO:0005576);; Biological Process: chitin catabolic process (GO:0006032);; Molecular Function: chitin binding (GO:0008061);;	K01183|6e-83|haw:110369951|K01183 E3.2.1.14; chitinase [EC:3.2.1.14]	[G]	Carbohydrate transport and metabolism	Glycosyl hydrolases family 18	Endochitinase OS=Manduca sexta OX=7130 PE=2 SV=1	probable chitinase 10 [Spodoptera litura]
TRINITY_DN24117_c1_g1	24.3912	545.006	4.48084	0.00115298	0.0329099	up	--	--	--	--|5e-08|tnl:113505918|hypothetical protein	--	--	--	--	uncharacterized protein LOC111357555 [Spodoptera litura]
TRINITY_DN23251_c3_g1	3.5237	23.8526	2.73473	0.000560962	0.0196922	up	[RTKL]	--	Molecular Function: transmembrane receptor protein tyrosine kinase activity (GO:0004714);; Molecular Function: ATP binding (GO:0005524);; Cellular Component: plasma membrane (GO:0005886);; Biological Process: multicellular organism development (GO:0007275);; Cellular Component: integral component of membrane (GO:0016021);; Molecular Function: metal ion binding (GO:0046872);;	K12378|0.0|tnl:113505505|K12378 TOR; tyrosine-protein kinase receptor torso [EC:2.7.10.1]	[T]	Signal transduction mechanisms	Protein tyrosine kinase;; Protein kinase domain	Tyrosine-protein kinase receptor torso OS=Bombyx mori OX=7091 GN=tor PE=1 SV=1	tyrosine-protein kinase receptor torso-like isoform X1 [Spodoptera litura]
TRINITY_DN21865_c2_g1	8.90482	59.5546	2.75023	4.33e-05	0.00296086	up	--	--	--	--	--	--	--	--	pancreatic triacylglycerol lipase-like [Spodoptera litura]
TRINITY_DN23261_c1_g2	259.927	7621.07	4.87403	1.37e-06	0.000189346	up	[G]	Carbohydrate transport and metabolism	Cellular Component: phosphopyruvate hydratase complex (GO:0000015);; Molecular Function: magnesium ion binding (GO:0000287);; Molecular Function: phosphopyruvate hydratase activity (GO:0004634);; Cellular Component: cytoplasm (GO:0005737);; Cellular Component: lipid droplet (GO:0005811);; Cellular Component: plasma membrane (GO:0005886);; Biological Process: glycolytic process (GO:0006096);; Biol…	K01689|1e-116|haw:110372787|K01689 ENO; enolase [EC:4.2.1.11]	[G]	Carbohydrate transport and metabolism	Enolase, C-terminal TIM barrel domain	Enolase OS=Drosophila melanogaster OX=7227 GN=Eno PE=1 SV=2	putative enolase protein, partial [Spodoptera frugiperda]
TRINITY_DN28949_c0_g1	95.8809	14.1421	-2.75143	0.00152098	0.0400091	down	--	--	--	--|0.0|haw:110373630|hypothetical protein	[R]	General function prediction only	Pao retrotransposon peptidase;; Putative peptidase (DUF1758)	--	uncharacterized protein LOC110373630 [Helicoverpa armigera]
TRINITY_DN28868_c2_g1	27.493	244.241	3.15042	0.00142624	0.0382916	up	--	--	--	--|3e-19|haw:110381735|hypothetical protein	--	--	--	--	uncharacterized protein LOC111356152 [Spodoptera litura]
TRINITY_DN15941_c0_g1	365.745	122.813	-1.57304	0.000214805	0.00991314	down	--	--	--	--|3e-30|tnl:113506598|hypothetical protein	--	--	Lipoprotein amino terminal region	--	uncharacterized protein LOC111362094 [Spodoptera litura]
TRINITY_DN28577_c0_g1	171.695	36.1028	-2.24325	2.67e-05	0.00204453	down	--	--	Molecular Function: S-adenosyl-L-methionine transmembrane transporter activity (GO:0000095);; Cellular Component: mitochondrial inner membrane (GO:0005743);; Biological Process: mitochondrial transport (GO:0006839);; Biological Process: S-adenosyl-L-methionine transport (GO:0015805);; Cellular Component: integral component of membrane (GO:0016021);;	K15111|1e-168|haw:110379512|K15111 SLC25A26; solute carrier family 25 (mitochondrial S-adenosylmethionine transporter), member 26	[C]	Energy production and conversion	Mitochondrial carrier protein	S-adenosylmethionine mitochondrial carrier protein homolog OS=Drosophila melanogaster OX=7227 GN=CG4743 PE=2 SV=2	S-adenosylmethionine mitochondrial carrier protein homolog [Spodoptera litura]
TRINITY_DN19917_c0_g1	414.412	126.775	-1.70763	0.000825983	0.026062	down	--	--	--	K17427|1e-85|haw:110370716|K17427 MRPL46; large subunit ribosomal protein L46	[J]	Translation, ribosomal structure and biogenesis	39S mitochondrial ribosomal protein L46	--	39S ribosomal protein L46, mitochondrial [Spodoptera litura]
TRINITY_DN20564_c1_g2	748.63	336.231	-1.15498	0.000674212	0.0223903	down	--	--	--	K22762|2e-10|tnl:113494867|K22762 DESI1; desumoylating isopeptidase 1 [EC:3.4.-.-]	--	--	--	--	uncharacterized protein LOC111359613, partial [Spodoptera litura]
TRINITY_DN20470_c0_g2	167.302	708.803	2.08232	0.00182826	0.0447667	up	--	--	--	--|0.0|haw:110375006|hypothetical protein	--	--	Corticotropin-releasing factor binding protein (CRF-BP)	--	corticotropin-releasing factor-binding protein [Spodoptera litura]
TRINITY_DN19351_c0_g1	2004.35	621.355	-1.68928	0.000578315	0.0201511	down	--	--	Cellular Component: mitochondrial inner membrane presequence translocase complex (GO:0005744);; Biological Process: protein targeting to mitochondrion (GO:0006626);; Molecular Function: P-P-bond-hydrolysis-driven protein transmembrane transporter activity (GO:0015450);; Biological Process: protein import into mitochondrial matrix (GO:0030150);; Cellular Component: integral component of mitochondr…	K17795|5e-71|haw:110375070|K17795 TIM17; mitochondrial import inner membrane translocase subunit TIM17	[U]	Intracellular trafficking, secretion, and vesicular transport	Tim17/Tim22/Tim23/Pmp24 family	Probable mitochondrial import inner membrane translocase subunit Tim17 1 OS=Drosophila melanogaster OX=7227 GN=Tim17b1 PE=2 SV=2	mitochondrial import inner membrane translocase subunit Tim17-B [Spodoptera litura]
TRINITY_DN25515_c2_g1	5.21675	68.187	3.70706	0.00186314	0.0453085	up	--	--	Cellular Component: extracellular region (GO:0005576);; Molecular Function: phosphatidylcholine 1-acylhydrolase activity (GO:0008970);; Biological Process: lipid catabolic process (GO:0016042);; Biological Process: hemolysis in other organism (GO:0044179);; Molecular Function: phosphatidylserine 1-acylhydrolase activity (GO:0052739);; Molecular Function: 1-acyl-2-lysophosphatidylserine acylhydrol…	--|7e-62|haw:110378973|hypothetical protein	--	--	Lipase	Phospholipase A1 OS=Polistes annularis OX=27505 PE=2 SV=1	lipase member H-like [Spodoptera litura]
TRINITY_DN22259_c1_g1	0.364207	17.868	5.48547	0.000624915	0.0214046	up	[Q]	Secondary metabolites biosynthesis, transport and catabolism	Molecular Function: obsolete signal transducer activity (GO:0004871);; Cellular Component: intracellular (GO:0005622);; Biological Process: signal transduction (GO:0007165);; Biological Process: flavonoid biosynthetic process (GO:0009813);; Biological Process: positive regulation of gene expression (GO:0010628);; Biological Process: negative regulation of gene expression (GO:0010629);; Molecular …	K00665|2e-44|haw:110370854|K00665 FASN; fatty acid synthase, animal type [EC:2.3.1.85]	[I]	Lipid transport and metabolism	Beta-ketoacyl synthase, N-terminal domain	Probable polyketide synthase 1 OS=Dictyostelium discoideum OX=44689 GN=stlA PE=1 SV=1	fatty acid synthase-like isoform X2 [Spodoptera litura]
TRINITY_DN17757_c0_g1	5345.51	1.76961	-11.5716	3e-10	1.39e-07	down	--	--	--	--|1e-173|haw:110371645|hypothetical protein	--	--	Domain of unknown function (DUF4779)	Histidine-rich glycoprotein OS=Plasmodium lophurae OX=5853 PE=4 SV=1	histidine-rich glycoprotein-like [Spodoptera litura]
TRINITY_DN30002_c0_g1	3.80696	63.2099	4.06872	1.45e-05	0.00125807	up	--	--	--	--|6e-61|haw:110377735|hypothetical protein	--	--	Domain of unknown function (DUF4786)	--	uncharacterized protein LOC111359456 [Spodoptera litura]
TRINITY_DN29150_c0_g1	4652.96	2135.14	-1.1239	0.00113705	0.0326089	down	--	--	Molecular Function: zinc ion binding (GO:0008270);; Cellular Component: cell junction (GO:0030054);; Cellular Component: striated muscle dense body (GO:0055120);;	K12562|0.0|tnl:113500413|K12562 AMPH; amphiphysin	[U]	Intracellular trafficking, secretion, and vesicular transport	BAR domain;; Variant SH3 domain;; SH3 domain;; Variant SH3 domain	LIM and SH3 domain protein F42H10.3 OS=Caenorhabditis elegans OX=6239 GN=F42H10.3 PE=4 SV=3	myc box-dependent-interacting protein 1 isoform X3 [Spodoptera litura]
TRINITY_DN30385_c1_g3	731.905	80.6776	-3.18077	3.63e-05	0.00261501	down	[G]	Carbohydrate transport and metabolism	Biological Process: autophagosome assembly (GO:0000045);; Molecular Function: UTP:glucose-1-phosphate uridylyltransferase activity (GO:0003983);; Cellular Component: cytoplasm (GO:0005737);; Biological Process: glycogen metabolic process (GO:0005977);; Biological Process: UDP-glucose metabolic process (GO:0006011);; Biological Process: cellulose biosynthetic process (GO:0030244);; Biological Proc…	K00963|0.0|haw:110376763|K00963 UGP2; UTP--glucose-1-phosphate uridylyltransferase [EC:2.7.7.9]	[G]	Carbohydrate transport and metabolism	UTP--glucose-1-phosphate uridylyltransferase	UTP--glucose-1-phosphate uridylyltransferase 2 OS=Dictyostelium discoideum OX=44689 GN=ugpB PE=2 SV=1	UTP--glucose-1-phosphate uridylyltransferase isoform X1 [Spodoptera litura]
TRINITY_DN20382_c1_g1	3269.16	562.399	-2.53892	0.00109462	0.0317509	down	--	--	Molecular Function: transporter activity (GO:0005215);; Cellular Component: cytoplasm (GO:0005737);; Molecular Function: lipid binding (GO:0008289);;	--|2e-29|haw:110380897|hypothetical protein	[I]	Lipid transport and metabolism	Lipocalin / cytosolic fatty-acid binding protein family	Fatty acid-binding protein 1 OS=Manduca sexta OX=7130 GN=MFB1 PE=2 SV=1	fatty acid-binding protein 2-like [Spodoptera litura]
TRINITY_DN31924_c4_g3	4.16052	87.6479	4.48426	2.55e-08	6.75e-06	up	[F]	Nucleotide transport and metabolism	Molecular Function: xanthine dehydrogenase activity (GO:0004854);; Molecular Function: xanthine oxidase activity (GO:0004855);; Molecular Function: iron ion binding (GO:0005506);; Cellular Component: peroxisome (GO:0005777);; Molecular Function: electron transfer activity (GO:0009055);; Biological Process: xanthine catabolic process (GO:0009115);; Molecular Function: oxidoreductase activity, acti…	K00106|4e-52|haw:110381341|K00106 XDH; xanthine dehydrogenase/oxidase [EC:1.17.1.4 1.17.3.2]	[F]	Nucleotide transport and metabolism	Molybdopterin-binding domain of aldehyde dehydrogenase	Xanthine dehydrogenase OS=Drosophila subobscura OX=7241 GN=Xdh PE=3 SV=1	xanthine dehydrogenase 1-like [Spodoptera litura]
TRINITY_DN29898_c0_g2	16.2168	133.166	3.01848	0.000578797	0.0201511	up	--	--	Molecular Function: DNA replication origin binding (GO:0003688);; Molecular Function: ATP binding (GO:0005524);; Cellular Component: nucleus (GO:0005634);; Cellular Component: nuclear origin of replication recognition complex (GO:0005664);; Cellular Component: cytoplasm (GO:0005737);; Biological Process: DNA replication (GO:0006260);;	--|1e-142|haw:110371830|hypothetical protein	--	--	Chitin binding Peritrophin-A domain	Origin recognition complex subunit 1 OS=Plasmodium falciparum (isolate 3D7) OX=36329 GN=orc1 PE=1 SV=1	uncharacterized protein LOC111358504 [Spodoptera litura]
TRINITY_DN21277_c2_g1	307.425	53.6729	-2.51756	4.69e-05	0.00314333	down	--	--	--	--	--	--	--	--	uncharacterized protein LOC111350953 [Spodoptera litura]
TRINITY_DN15136_c0_g1	2559.98	9.39022	-8.091	9.17e-11	4.85e-08	down	--	--	Molecular Function: structural constituent of cuticle (GO:0042302);;	--|4e-28|haw:110384145|hypothetical protein	--	--	--	Endocuticle structural glycoprotein ABD-5 OS=Locusta migratoria OX=7004 PE=1 SV=1	endocuticle structural glycoprotein ABD-5-like [Spodoptera litura]
TRINITY_DN25741_c0_g1	661.918	196.727	-1.74926	0.000213334	0.00988024	down	[GEPR]	--	Cellular Component: plasma membrane (GO:0005886);; Molecular Function: trehalose transmembrane transporter activity (GO:0015574);; Biological Process: trehalose transport (GO:0015771);; Cellular Component: integral component of membrane (GO:0016021);;	--|0.0|tnl:113502917|hypothetical protein	[R]	General function prediction only	Sugar (and other) transporter;; Major Facilitator Superfamily	Facilitated trehalose transporter Tret1 OS=Polypedilum vanderplanki OX=319348 GN=Tret1 PE=1 SV=1	facilitated trehalose transporter Tret1-2 homolog [Spodoptera litura]
TRINITY_DN30924_c1_g2	1190.56	120.898	-3.29889	1.78e-05	0.00148232	down	[GEPR]	--	Cellular Component: integral component of plasma membrane (GO:0005887);; Biological Process: apoptotic process (GO:0006915);; Molecular Function: organic anion transmembrane transporter activity (GO:0008514);; Cellular Component: integral component of membrane (GO:0016021);;	--|5e-98|haw:110379859|hypothetical protein	[R]	General function prediction only	Major Facilitator Superfamily;; Sugar (and other) transporter	Organic cation transporter protein OS=Drosophila melanogaster OX=7227 GN=Orct PE=1 SV=1	organic cation transporter protein-like [Spodoptera litura]
TRINITY_DN17839_c0_g1	624.424	156.223	-1.99775	1.52e-05	0.00129741	down	--	--	Molecular Function: structural constituent of ribosome (GO:0003735);; Cellular Component: mitochondrion (GO:0005739);; Cellular Component: mitochondrial large ribosomal subunit (GO:0005762);; Biological Process: translation (GO:0006412);; Biological Process: multicellular organism development (GO:0007275);; Biological Process: mitochondrial translation (GO:0032543);;	K17436|2e-65|tnl:113495483|K17436 MRPL55; large subunit ribosomal protein L55	[J]	Translation, ribosomal structure and biogenesis	Mitochondrial ribosomal protein L55	39S ribosomal protein L55, mitochondrial OS=Drosophila melanogaster OX=7227 GN=mRpL55 PE=1 SV=1	39S ribosomal protein L55, mitochondrial [Spodoptera litura]
TRINITY_DN27092_c0_g1	37.2204	121.44	1.6964	0.00126796	0.0353405	up	[R]	General function prediction only	--	--|0.0|haw:110371326|hypothetical protein	[R]	General function prediction only	--	Uncharacterized protein DDB_G0286299 OS=Dictyostelium discoideum OX=44689 GN=DDB_G0286299 PE=4 SV=1	testis-expressed protein 2 isoform X2 [Spodoptera litura]
TRINITY_DN21415_c0_g4	1631.55	511.046	-1.67446	0.000189458	0.00905366	down	[J]	Translation, ribosomal structure and biogenesis	Biological Process: maturation of SSU-rRNA from tricistronic rRNA transcript (SSU-rRNA, 5.8S rRNA, LSU-rRNA) (GO:0000462);; Molecular Function: structural constituent of ribosome (GO:0003735);; Cellular Component: mitochondrial small ribosomal subunit (GO:0005763);; Biological Process: translation (GO:0006412);;	K02996|0.0|haw:110376348|K02996 RP-S9; small subunit ribosomal protein S9	[J]	Translation, ribosomal structure and biogenesis	Ribosomal protein S9/S16	Probable 40S ribosomal protein S9, mitochondrial OS=Caenorhabditis elegans OX=6239 GN=mrps-9 PE=3 SV=2	28S ribosomal protein S9, mitochondrial-like [Spodoptera litura]
TRINITY_DN23309_c1_g1	1881.74	177.772	-3.40385	3.68e-06	0.000420962	down	--	--	--	--|1e-160|haw:110370628|hypothetical protein	--	--	Eukaryotic cytochrome b561	--	uncharacterized protein LOC111365022 [Spodoptera litura]
TRINITY_DN17702_c0_g1	1151.08	245.066	-2.23102	9.5e-05	0.00550317	down	[J]	Translation, ribosomal structure and biogenesis	Molecular Function: structural constituent of ribosome (GO:0003735);; Cellular Component: mitochondrial small ribosomal subunit (GO:0005763);; Biological Process: translation (GO:0006412);; Biological Process: mitochondrial translation (GO:0032543);;	K02959|2e-55|tnl:113496066|K02959 RP-S16; small subunit ribosomal protein S16	[J]	Translation, ribosomal structure and biogenesis	Ribosomal protein S16	Probable 28S ribosomal protein S16, mitochondrial OS=Drosophila melanogaster OX=7227 GN=mRpS16 PE=2 SV=1	probable 28S ribosomal protein S16, mitochondrial [Spodoptera litura]
TRINITY_DN29642_c0_g1	1331.93	404.411	-1.71948	0.00142941	0.0382916	down	[I]	Lipid transport and metabolism	Molecular Function: carboxylic ester hydrolase activity (GO:0052689);;	--|0.0|haw:110370334|hypothetical protein	[R]	General function prediction only	Carboxylesterase family;; alpha/beta hydrolase fold	Esterase FE4 OS=Myzus persicae OX=13164 PE=1 SV=1	carboxylesterase [Helicoverpa armigera]
TRINITY_DN24939_c0_g2	1099.97	216.535	-2.34459	6.48e-06	0.000660188	down	--	--	--	--|7e-88|haw:110371634|hypothetical protein	--	--	Immunoglobulin V-set domain;; Immunoglobulin domain	--	uncharacterized protein LOC111348582 isoform X2 [Spodoptera litura]
TRINITY_DN20238_c0_g2	3609.21	73.3872	-5.62107	0.000843143	0.0264066	down	--	--	Molecular Function: structural constituent of cuticle (GO:0042302);;	--|3e-79|tnl:113502678|hypothetical protein	--	--	Insect cuticle protein	Cuticle protein 8 OS=Locusta migratoria OX=7004 PE=1 SV=1	histidine-rich protein PFHRP-II-like [Spodoptera litura]
TRINITY_DN23709_c1_g1	77.2544	415.894	2.43423	4.9e-05	0.00324918	up	--	--	--	--|6e-37|haw:110373446|hypothetical protein	--	--	--	--	uncharacterized protein LOC111350462 [Spodoptera litura]
TRINITY_DN22369_c0_g1	78.0445	2.02138	-5.27762	0.00189925	0.0459355	down	[L]	Replication, recombination and repair	Cellular Component: nuclear chromosome (GO:0000228);; Biological Process: meiotic DNA double-strand break processing (GO:0000706);; Biological Process: DNA catabolic process, endonucleolytic (GO:0000737);; Molecular Function: DNA binding (GO:0003677);; Molecular Function: DNA topoisomerase type II (ATP-hydrolyzing) activity (GO:0003918);; Molecular Function: ATP binding (GO:0005524);; Biological …	K10878|0.0|tnl:113501283|K10878 SPO11; meiotic recombination protein SPO11	[L]	Replication, recombination and repair	Type IIB DNA topoisomerase	Meiotic recombination protein W68 OS=Drosophila melanogaster OX=7227 GN=mei-W68 PE=2 SV=1	meiotic recombination protein SPO11 [Spodoptera litura]
TRINITY_DN31677_c1_g1	72.1336	455.407	2.65364	4.33e-10	1.89e-07	up	--	--	Cellular Component: extracellular space (GO:0005615);; Molecular Function: metalloendopeptidase inhibitor activity (GO:0008191);; Biological Process: anatomical structure morphogenesis (GO:0009653);; Biological Process: extracellular matrix organization (GO:0030198);; Biological Process: wound healing (GO:0042060);;	--|0.0|tnl:113495108|hypothetical protein	[T]	Signal transduction mechanisms	Trypsin Inhibitor like cysteine rich domain	Inducible metalloproteinase inhibitor protein OS=Galleria mellonella OX=7137 GN=IMPI PE=1 SV=2	zonadhesin-like [Spodoptera litura]
TRINITY_DN29802_c2_g1	697.08	128.671	-2.43575	1.5e-07	2.98e-05	down	[F]	Nucleotide transport and metabolism	Molecular Function: GMP reductase activity (GO:0003920);; Biological Process: purine nucleobase metabolic process (GO:0006144);; Biological Process: nucleotide metabolic process (GO:0009117);; Molecular Function: metal ion binding (GO:0046872);; Cellular Component: GMP reductase complex (GO:1902560);;	K00364|0.0|tnl:113494314|K00364 E1.7.1.7; GMP reductase [EC:1.7.1.7]	[F]	Nucleotide transport and metabolism	IMP dehydrogenase / GMP reductase domain	GMP reductase OS=Caenorhabditis elegans OX=6239 GN=F32D1.5 PE=3 SV=1	GMP reductase 1-like [Spodoptera litura]
TRINITY_DN23714_c0_g1	125.327	1.508	-6.40976	2.66e-06	0.000326245	down	[Q]	Secondary metabolites biosynthesis, transport and catabolism	Molecular Function: iron ion binding (GO:0005506);; Cellular Component: endoplasmic reticulum membrane (GO:0005789);; Molecular Function: heme binding (GO:0020037);; Cellular Component: organelle membrane (GO:0031090);; Molecular Function: aromatase activity (GO:0070330);;	K15001|0.0|haw:110370438|K15001 CYP4; cytochrome P450 family 4 [EC:1.14.-.-]	[QI]	--	Cytochrome P450	Cytochrome P450 4C1 OS=Blaberus discoidalis OX=6981 GN=CYP4C1 PE=2 SV=1	cytochrome P450 4V2-like [Spodoptera litura]
TRINITY_DN25517_c3_g3	239.477	86.684	-1.46374	0.0017826	0.0440857	down	[QR]	--	Cellular Component: mitochondrion (GO:0005739);; Molecular Function: methyltransferase activity (GO:0008168);; Biological Process: negative regulation of autophagy (GO:0010507);; Molecular Function: oxidoreductase activity (GO:0016491);; Biological Process: sporulation resulting in formation of a cellular spore (GO:0030435);; Biological Process: culmination involved in sorocarp development (GO:00…	K18162|0.0|haw:110381172|K18162 NDUFAF5; NADH dehydrogenase [ubiquinone] 1 alpha subcomplex assembly factor 5 [EC:2.1.1.-]	[R]	General function prediction only	Methyltransferase domain;; Methyltransferase domain;; Methyltransferase domain;; Methyltransferase domain;; Methyltransferase domain	Arginine-hydroxylase NDUFAF5, mitochondrial OS=Dictyostelium discoideum OX=44689 GN=ndufaf5 PE=1 SV=1	arginine-hydroxylase NDUFAF5, mitochondrial [Spodoptera litura]
TRINITY_DN21273_c5_g1	28.7207	961.162	5.05973	4.19e-09	1.39e-06	up	--	--	Cellular Component: extracellular space (GO:0005615);; Biological Process: innate immune response (GO:0045087);;	--|0.0|haw:110380698|hypothetical protein	[T]	Signal transduction mechanisms	Immunoglobulin I-set domain;; Immunoglobulin domain;; Immunoglobulin domain;; Immunoglobulin domain;; Immunoglobulin V-set domain;; CD80-like C2-set immunoglobulin domain;; Ig-like domain on T-cell surface glycoprotein CD3 epsilon chain	Hemolin OS=Manduca sexta OX=7130 PE=2 SV=2	hemolin-like [Spodoptera litura]
TRINITY_DN18190_c0_g1	0.364207	27.2045	6.09108	0.000112299	0.0061729	up	--	--	--	--	--	--	--	--	uncharacterized protein LOC111361221 [Spodoptera litura]
TRINITY_DN25038_c1_g2	0	9.6901	5.55981	0.000818557	0.0258828	up	--	--	Molecular Function: ATP binding (GO:0005524);; Cellular Component: cytoplasm (GO:0005737);; Biological Process: protein folding (GO:0006457);; Biological Process: response to stress (GO:0006950);;	K04079|0.0|bter:100645819|K04079 HSP90A; molecular chaperone HtpG	[O]	Posttranslational modification, protein turnover, chaperones	Hsp90 protein;; Histidine kinase-, DNA gyrase B-, and HSP90-like ATPase;; Histidine kinase-, DNA gyrase B-, and HSP90-like ATPase	Heat shock protein 83 OS=Bombyx mori OX=7091 GN=Hsp83 PE=1 SV=1	heat shock protein 90-2, partial [Laodelphax striatella]
TRINITY_DN24501_c0_g1	1582.75	527.436	-1.58552	0.0012301	0.0345127	down	--	--	--	--|1e-136|haw:110370566|hypothetical protein	[S]	Function unknown	TRIC channel	Trimeric intracellular cation channel type 1B.1 OS=Caenorhabditis elegans OX=6239 GN=tric-1B.1 PE=1 SV=2	trimeric intracellular cation channel type 1B.1 [Spodoptera litura]
TRINITY_DN25538_c0_g1	7.05803	128.779	4.15913	5.99e-06	0.000621637	up	--	--	--	--	--	--	--	--	collagen alpha-1(IV) chain-like [Spodoptera litura]
TRINITY_DN27919_c2_g2	1.75022	30.9129	4.09716	0.000183162	0.00883613	up	--	--	--	K03098|4e-12|haw:110376455|K03098 APOD; apolipoprotein D and lipocalin family protein	--	--	--	--	insecticyanin-A-like [Spodoptera litura]
TRINITY_DN29250_c1_g1	2669.39	536.129	-2.31569	8.44e-05	0.00509082	down	--	--	--	K04374|9e-06|haw:110370227|K04374 ATF4; cyclic AMP-dependent transcription factor ATF-4	--	--	--	--	activating transcription factor of chaperone isoform X2 [Helicoverpa armigera]
TRINITY_DN28588_c1_g1	7109.63	1582.04	-2.1679	5.14e-05	0.00336371	down	[E]	Amino acid transport and metabolism	Molecular Function: glycine hydroxymethyltransferase activity (GO:0004372);; Cellular Component: mitochondrion (GO:0005739);; Biological Process: glycine metabolic process (GO:0006544);; Biological Process: L-serine metabolic process (GO:0006563);; Biological Process: serine family amino acid metabolic process (GO:0009069);; Biological Process: embryo development (GO:0009790);; Biological Process…	K00600|0.0|haw:110376519|K00600 glyA; glycine hydroxymethyltransferase [EC:2.1.2.1]	[E]	Amino acid transport and metabolism	Serine hydroxymethyltransferase	Serine hydroxymethyltransferase OS=Caenorhabditis elegans OX=6239 GN=mel-32 PE=1 SV=2	serine hydroxymethyltransferase, cytosolic isoform X2 [Spodoptera litura]
TRINITY_DN26251_c1_g4	268.371	38.9616	-2.78143	0.000699647	0.022894	down	--	--	Cellular Component: extracellular region (GO:0005576);; Biological Process: antibacterial humoral response (GO:0019731);; Biological Process: antifungal humoral response (GO:0019732);; Biological Process: killing of cells of other organism (GO:0031640);;	--|2e-79|haw:110370484|hypothetical protein	--	--	--	Acanthoscurrin-2 (Fragment) OS=Acanthoscurria gomesiana OX=115339 GN=acantho2 PE=1 SV=1	proline-rich extensin-like protein EPR1 [Spodoptera litura]
TRINITY_DN24623_c1_g1	941.953	213.564	-2.14132	3.76e-05	0.00270061	down	[C]	Energy production and conversion	Cellular Component: mitochondrial inner membrane (GO:0005743);; Molecular Function: proton transmembrane transporter activity (GO:0015078);; Biological Process: ATP synthesis coupled proton transport (GO:0015986);; Cellular Component: integral component of membrane (GO:0016021);; Cellular Component: proton-transporting ATP synthase complex, coupling factor F(o) (GO:0045263);;	K02126|4e-91|tnl:113502839|K02126 ATPeF0A; F-type H+-transporting ATPase subunit a	[C]	Energy production and conversion	--	ATP synthase subunit a OS=Anopheles quadrimaculatus OX=7166 GN=ATP6 PE=3 SV=1	ATP synthase F0 subunit 6 (mitochondrion) [Spodoptera frugiperda]
TRINITY_DN25972_c0_g1	62.4051	20.3785	-1.61072	0.00179439	0.0442297	down	[R]	General function prediction only	Molecular Function: calcium ion binding (GO:0005509);; Molecular Function: calcium-dependent phospholipid binding (GO:0005544);; Cellular Component: plasma membrane (GO:0005886);; Biological Process: intracellular protein transport (GO:0006886);; Biological Process: vesicle fusion (GO:0006906);; Cellular Component: synaptic vesicle (GO:0008021);; Biological Process: regulation of calcium ion-depe…	K19938|0.0|haw:110373666|K19938 RPH3A; rabphilin-3A	[U]	Intracellular trafficking, secretion, and vesicular transport	C2 domain;; FYVE-type zinc finger	Rabphilin-1 OS=Caenorhabditis elegans OX=6239 GN=rbf-1 PE=2 SV=2	rabphilin-3A [Helicoverpa armigera]
TRINITY_DN24685_c2_g1	12.9207	568.025	5.45582	3.12e-17	4.87e-14	up	--	--	--	--|8e-20|haw:110383372|hypothetical protein	--	--	--	Fibroin heavy chain OS=Bombyx mori OX=7091 GN=FIBH PE=1 SV=4	spidroin-1-like [Spodoptera litura]
TRINITY_DN23333_c1_g1	2280.01	656.069	-1.79714	4.48e-06	0.000486409	down	--	--	--	--|9e-34|bmor:101743133|hypothetical protein	--	--	--	--	uncharacterized protein LOC101743133 [Bombyx mori]
TRINITY_DN26716_c1_g1	140.764	48.8089	-1.52574	0.000505268	0.0181896	down	--	--	--	K17658|0.0|haw:110375515|K17658 TEFM; transcription elongation factor, mitochondrial	--	--	--	--	uncharacterized protein LOC111359220 isoform X1 [Spodoptera litura]
TRINITY_DN30844_c0_g1	84.0985	349.232	2.0577	4.33e-05	0.00296086	up	[GEPR]	--	Biological Process: sodium ion transport (GO:0006814);; Molecular Function: phosphate ion transmembrane transporter activity (GO:0015114);; Molecular Function: symporter activity (GO:0015293);; Cellular Component: integral component of membrane (GO:0016021);;	--|0.0|haw:110379707|hypothetical protein	[G]	Carbohydrate transport and metabolism	Major Facilitator Superfamily	Putative inorganic phosphate cotransporter OS=Drosophila ananassae OX=7217 GN=Picot PE=3 SV=1	putative inorganic phosphate cotransporter [Spodoptera litura]
TRINITY_DN31395_c1_g2	285.459	893.823	1.64506	0.00162341	0.041861	up	--	--	--	--|1e-62|haw:110380998|hypothetical protein	--	--	--	--	protein abrupt-like isoform X5 [Spodoptera litura]
TRINITY_DN28116_c0_g3	20.5199	200.609	3.30339	0.000241317	0.0107354	up	--	--	--	--|3e-46|haw:110383824|hypothetical protein	--	--	--	--	glycine-rich protein DOT1-like [Spodoptera litura]
TRINITY_DN16045_c0_g2	1463.96	196.855	-2.894	2.34e-05	0.00184761	down	--	--	Cellular Component: mitochondrial inner membrane presequence translocase complex (GO:0005744);; Biological Process: protein targeting to mitochondrion (GO:0006626);; Molecular Function: P-P-bond-hydrolysis-driven protein transmembrane transporter activity (GO:0015450);; Molecular Function: metal ion binding (GO:0046872);;	K17777|1e-54|haw:110384544|K17777 TIM9; mitochondrial import inner membrane translocase subunit TIM9	[U]	Intracellular trafficking, secretion, and vesicular transport	Tim10/DDP family zinc finger	Mitochondrial import inner membrane translocase subunit Tim9 OS=Drosophila melanogaster OX=7227 GN=Tim9a PE=3 SV=1	mitochondrial import inner membrane translocase subunit Tim9-like [Spodoptera litura]
TRINITY_DN29024_c0_g1	2194.03	805.236	-1.44622	0.00055906	0.0196487	down	--	--	--	--|1e-142|haw:110383774|hypothetical protein	[S]	Function unknown	--	Histidine-rich glycoprotein OS=Plasmodium lophurae OX=5853 PE=4 SV=1	protein starmaker isoform X4 [Spodoptera litura]
TRINITY_DN31228_c0_g1	0.364207	15.8473	5.31231	0.000651293	0.0218781	up	--	--	--	--	--	--	--	--	PREDICTED: vegetative cell wall protein gp1-like, partial [Megachile rotundata]
TRINITY_DN17976_c0_g2	893.101	23.1443	-5.26959	4e-05	0.00282919	down	--	--	--	--|7e-14|haw:110381633|hypothetical protein	--	--	Transcription activator MBF2	--	REPAT46 [Spodoptera littoralis]
TRINITY_DN27627_c1_g3	24.7296	0	-7.30026	0.000891597	0.0274027	down	--	--	Cellular Component: extracellular region (GO:0005576);; Molecular Function: phosphatidylcholine 1-acylhydrolase activity (GO:0008970);; Biological Process: lipid catabolic process (GO:0016042);; Biological Process: hemolysis in other organism (GO:0044179);; Molecular Function: phosphatidylserine 1-acylhydrolase activity (GO:0052739);; Molecular Function: 1-acyl-2-lysophosphatidylserine acylhydrol…	K19404|5e-68|haw:110370747|K19404 LIPH_I; phosphatidic acid-selective phospholipase A1 [EC:3.1.1.-]	--	--	Lipase	Phospholipase A1 OS=Vespula squamosa OX=30214 PE=1 SV=1	uncharacterized protein LOC111362842 [Spodoptera litura]
TRINITY_DN21327_c3_g1	43.2576	753.64	4.1217	2.72e-06	0.000330243	up	--	--	--	--	--	--	--	--	aldo-keto reductase AKR2E4-like [Spodoptera litura]
TRINITY_DN31014_c0_g1	26.9006	87.9483	1.71057	0.00105464	0.0308984	up	[T]	Signal transduction mechanisms	Molecular Function: protein tyrosine phosphatase activity (GO:0004725);; Molecular Function: transmembrane receptor protein tyrosine phosphatase activity (GO:0005001);; Cellular Component: plasma membrane (GO:0005886);; Biological Process: protein dephosphorylation (GO:0006470);; Biological Process: cell adhesion (GO:0007155);; Biological Process: axon guidance (GO:0007411);; Biological Process: …	--|0.0|haw:110373898|hypothetical protein	[T]	Signal transduction mechanisms	Protein-tyrosine phosphatase;; Fibronectin type III domain;; Immunoglobulin domain;; Immunoglobulin I-set domain;; Immunoglobulin domain;; Immunoglobulin domain;; Interferon-alpha/beta receptor, fibronectin type III	Tyrosine-protein phosphatase 69D OS=Drosophila melanogaster OX=7227 GN=Ptp69D PE=1 SV=2	tyrosine-protein phosphatase 69D [Spodoptera litura]
TRINITY_DN29911_c0_g1	1292.55	416.326	-1.63448	0.000759608	0.0245695	down	[P]	Inorganic ion transport and metabolism	Molecular Function: calcium-transporting ATPase activity (GO:0005388);; Molecular Function: calcium ion binding (GO:0005509);; Molecular Function: ATP binding (GO:0005524);; Cellular Component: plasma membrane (GO:0005886);; Cellular Component: integral component of plasma membrane (GO:0005887);; Biological Process: calcium ion transport (GO:0006816);; Molecular Function: calcium ion transmembran…	--|0.0|haw:110373901|hypothetical protein	[P]	Inorganic ion transport and metabolism	Cation transporting ATPase, C-terminus;; Plasma membrane calcium transporter ATPase C terminal;; haloacid dehalogenase-like hydrolase	Calcium-transporting ATPase PAT1 OS=Dictyostelium discoideum OX=44689 GN=patA PE=2 SV=2	hypothetical protein B5V51_865 [Heliothis virescens]
TRINITY_DN19132_c5_g2	1.69254	17.6088	3.49859	0.00197081	0.0471657	up	--	--	--	--	--	--	--	--	uncharacterized protein LOC111354551 [Spodoptera litura]
TRINITY_DN27456_c7_g4	5407.08	130.541	-5.37306	9.56e-05	0.00551971	down	--	--	Cellular Component: extracellular region (GO:0005576);;	--|4e-92|haw:110374320|hypothetical protein	--	--	--	Putative uncharacterized protein DDB_G0290521 OS=Dictyostelium discoideum OX=44689 GN=DDB_G0290521 PE=3 SV=2	skin secretory protein xP2-like [Spodoptera litura]
TRINITY_DN19257_c3_g4	0.364207	24.6167	5.9448	7.79e-05	0.00475753	up	--	--	Molecular Function: iron ion binding (GO:0005506);; Molecular Function: cysteine dioxygenase activity (GO:0017172);; Biological Process: taurine biosynthetic process (GO:0042412);;	K00456|1e-40|tnl:113500011|K00456 CDO1; cysteine dioxygenase [EC:1.13.11.20]	[E]	Amino acid transport and metabolism	Cysteine dioxygenase type I	Cysteine dioxygenase 1 OS=Caenorhabditis elegans OX=6239 GN=cdo-1 PE=3 SV=2	cysteine dioxygenase type 1 [Spodoptera litura]
TRINITY_DN9413_c1_g2	22.7866	0.974958	-4.64321	0.00122027	0.0343445	down	--	--	Molecular Function: structural constituent of cuticle (GO:0042302);;	--|2e-96|haw:110384082|hypothetical protein	--	--	Insect cuticle protein	Endocuticle structural glycoprotein ABD-4 OS=Locusta migratoria OX=7004 PE=1 SV=3	uncharacterized protein LOC111349365 [Spodoptera litura]
TRINITY_DN30604_c1_g4	6578.32	1647.46	-1.99752	0.00111164	0.0321323	down	--	--	Biological Process: negative regulation of transcription by RNA polymerase II (GO:0000122);; Biological Process: cell fate specification (GO:0001708);; Biological Process: compound eye morphogenesis (GO:0001745);; Biological Process: defense response to insect (GO:0002213);; Molecular Function: chromatin binding (GO:0003682);; Molecular Function: signaling receptor activity (GO:0004872);; Molecul…	K04659|0.0|haw:110376123|K04659 THBS2S; thrombospondin 2/3/4/5	--	--	Thrombospondin C-terminal region;; Thrombospondin type 3 repeat;; Calcium-binding EGF domain	Neurogenic locus Notch protein OS=Drosophila melanogaster OX=7227 GN=N PE=1 SV=3	cartilage oligomeric matrix protein [Spodoptera litura]
TRINITY_DN22161_c2_g1	313.547	11033.4	5.13838	1.54e-07	3.05e-05	up	--	--	Cellular Component: extracellular region (GO:0005576);; Biological Process: defense response to bacterium (GO:0042742);;	--|8e-59|haw:110378327|hypothetical protein	--	--	--	Ctenidin-3 OS=Cupiennius salei OX=6928 PE=1 SV=1	glycine-rich cell wall structural protein-like [Spodoptera litura]
TRINITY_DN31263_c1_g1	2080.87	679.099	-1.61569	5.83e-06	0.000608118	down	[E]	Amino acid transport and metabolism	Molecular Function: proline dehydrogenase activity (GO:0004657);; Cellular Component: mitochondrion (GO:0005739);; Cellular Component: mitochondrial matrix (GO:0005759);; Biological Process: glutamate biosynthetic process (GO:0006537);; Biological Process: proline catabolic process (GO:0006562);; Biological Process: locomotory behavior (GO:0007626);; Biological Process: proline catabolic process …	K00318|0.0|haw:110371685|K00318 PRODH; proline dehydrogenase [EC:1.5.5.2]	[E]	Amino acid transport and metabolism	Proline dehydrogenase	Proline dehydrogenase 1, mitochondrial OS=Drosophila melanogaster OX=7227 GN=slgA PE=2 SV=2	proline dehydrogenase 1, mitochondrial [Spodoptera litura]
TRINITY_DN29613_c0_g1	7.33315	54.8168	2.96269	2.81e-05	0.00213625	up	[L]	Replication, recombination and repair	Molecular Function: nucleic acid binding (GO:0003676);; Molecular Function: RNA-directed DNA polymerase activity (GO:0003964);; Molecular Function: endonuclease activity (GO:0004519);; Cellular Component: nucleus (GO:0005634);; Biological Process: transposition, DNA-mediated (GO:0006313);; Molecular Function: peptidase activity (GO:0008233);; Biological Process: DNA integration (GO:0015074);;	K14401|0.0|pxy:105386838|K14401 CPSF1; cleavage and polyadenylation specificity factor subunit 1	[R]	General function prediction only	Reverse transcriptase (RNA-dependent DNA polymerase);; Integrase core domain	Retrovirus-related Pol polyprotein from transposon opus OS=Drosophila melanogaster OX=7227 GN=pol PE=3 SV=1	uncharacterized protein LOC112053649 [Bicyclus anynana]
TRINITY_DN27370_c2_g1	20027.2	2762.09	-2.85807	6.45e-08	1.47e-05	down	[O]	Posttranslational modification, protein turnover, chaperones	Molecular Function: cysteine-type peptidase activity (GO:0008234);;	--|4e-68|haw:110371528|hypothetical protein	[O]	Posttranslational modification, protein turnover, chaperones	Papain family cysteine protease;; Papain family cysteine protease;; Papain family cysteine protease	Digestive cysteine proteinase 1 OS=Homarus americanus OX=6706 GN=LCP1 PE=1 SV=2	putative C1A cysteine protease precursor [Spodoptera frugiperda]
TRINITY_DN21883_c2_g1	1856	501.942	-1.88607	0.000156197	0.00776479	down	--	--	--	K02963|1e-112|haw:110383409|K02963 RP-S18; small subunit ribosomal protein S18	[J]	Translation, ribosomal structure and biogenesis	Ribosomal protein S18	--	28S ribosomal protein S18a, mitochondrial [Spodoptera litura]
TRINITY_DN31012_c1_g1	2909.27	1207.02	-1.26907	0.00102526	0.0303014	down	[J]	Translation, ribosomal structure and biogenesis	Molecular Function: aminoacyl-tRNA editing activity (GO:0002161);; Molecular Function: valine-tRNA ligase activity (GO:0004832);; Molecular Function: ATP binding (GO:0005524);; Biological Process: valyl-tRNA aminoacylation (GO:0006438);; Biological Process: determination of adult lifespan (GO:0008340);;	K01873|0.0|haw:110383103|K01873 VARS; valyl-tRNA synthetase [EC:6.1.1.9]	[J]	Translation, ribosomal structure and biogenesis	tRNA synthetases class I (I, L, M and V);; Anticodon-binding domain of tRNA;; tRNA synthetases class I (M);; Leucyl-tRNA synthetase, Domain 2;; Valyl tRNA synthetase tRNA binding arm	Valine--tRNA ligase OS=Caenorhabditis elegans OX=6239 GN=glp-4 PE=1 SV=1	valine--tRNA ligase [Spodoptera litura]
TRINITY_DN31182_c1_g1	12.3101	444.708	5.17693	1.34e-09	5.17e-07	up	--	--	--	--|1e-141|haw:110373656|hypothetical protein	--	--	--	--	uncharacterized protein LOC111360005 isoform X2 [Spodoptera litura]
TRINITY_DN28014_c0_g1	2171.99	542.814	-2.00004	1.18e-05	0.0010757	down	[J]	Translation, ribosomal structure and biogenesis	Molecular Function: RNA binding (GO:0003723);; Molecular Function: structural constituent of ribosome (GO:0003735);; Cellular Component: mitochondrial small ribosomal subunit (GO:0005763);; Biological Process: translation (GO:0006412);;	K02988|0.0|haw:110373436|K02988 RP-S5; small subunit ribosomal protein S5	[J]	Translation, ribosomal structure and biogenesis	Ribosomal protein S5, C-terminal domain;; Ribosomal protein S5, N-terminal domain	Putative 28S ribosomal protein S5, mitochondrial OS=Caenorhabditis elegans OX=6239 GN=mrps-5 PE=3 SV=3	28S ribosomal protein S5, mitochondrial [Spodoptera litura]
TRINITY_DN30066_c3_g1	1309.29	311.677	-2.06984	6.02e-06	0.000621637	down	[G]	Carbohydrate transport and metabolism	Molecular Function: glucose-6-phosphate isomerase activity (GO:0004347);; Cellular Component: cytoplasm (GO:0005737);; Cellular Component: lipid droplet (GO:0005811);; Biological Process: gluconeogenesis (GO:0006094);; Biological Process: glycolytic process (GO:0006096);;	K01810|0.0|tnl:113494316|K01810 GPI; glucose-6-phosphate isomerase [EC:5.3.1.9]	[G]	Carbohydrate transport and metabolism	Phosphoglucose isomerase	Glucose-6-phosphate isomerase OS=Drosophila yakuba OX=7245 GN=Pgi PE=3 SV=1	glucose-6-phosphate isomerase [Spodoptera litura]
TRINITY_DN20128_c0_g1	1500.56	382.764	-1.97056	5.78e-07	9.2e-05	down	[J]	Translation, ribosomal structure and biogenesis	Molecular Function: structural constituent of ribosome (GO:0003735);; Cellular Component: ribosome (GO:0005840);; Biological Process: translation (GO:0006412);; Cellular Component: plastid (GO:0009536);; Molecular Function: rRNA binding (GO:0019843);; Cellular Component: organellar chromatophore (GO:0070111);;	K02878|1e-165|tnl:113504650|K02878 RP-L16; large subunit ribosomal protein L16	[J]	Translation, ribosomal structure and biogenesis	Ribosomal protein L16p/L10e	50S ribosomal protein L16, organellar chromatophore OS=Paulinella chromatophora OX=39717 GN=rpl16 PE=3 SV=2	39S ribosomal protein L16, mitochondrial [Spodoptera litura]
TRINITY_DN29452_c0_g1	273.256	1186.95	2.12019	0.000210315	0.00979749	up	[Q]	Secondary metabolites biosynthesis, transport and catabolism	Molecular Function: monooxygenase activity (GO:0004497);; Molecular Function: iron ion binding (GO:0005506);; Cellular Component: endoplasmic reticulum membrane (GO:0005789);; Molecular Function: oxidoreductase activity (GO:0016491);; Molecular Function: oxidoreductase activity, acting on paired donors, with incorporation or reduction of molecular oxygen (GO:0016705);; Molecular Function: heme bi…	K14999|1e-132|tnl:113495130|K14999 CYP6; cytochrome P450 family 6 [EC:1.14.-.-]	[Q]	Secondary metabolites biosynthesis, transport and catabolism	Cytochrome P450;; Cytochrome P450	Probable cytochrome P450 9f2 OS=Drosophila melanogaster OX=7227 GN=Cyp9f2 PE=2 SV=1	cytochrome P450 [Spodoptera exigua]
TRINITY_DN22244_c0_g1	1449.84	411.316	-1.81709	6.83e-06	0.000686223	down	--	--	Molecular Function: structural constituent of ribosome (GO:0003735);; Cellular Component: mitochondrial large ribosomal subunit (GO:0005762);; Biological Process: mitochondrial translation (GO:0032543);;	K17426|0.0|haw:110376777|K17426 MRPL45; large subunit ribosomal protein L45	[J]	Translation, ribosomal structure and biogenesis	Tim44-like domain	Probable 39S ribosomal protein L45, mitochondrial OS=Drosophila melanogaster OX=7227 GN=mRpL45 PE=2 SV=1	probable 39S ribosomal protein L45, mitochondrial [Spodoptera litura]
TRINITY_DN23350_c1_g2	29.3891	0.324986	-6.59158	0.000907609	0.0277796	down	--	--	--	--	--	--	--	--	hypothetical protein RR46_08615 [Papilio xuthus]
TRINITY_DN16796_c0_g1	1446.68	360.111	-2.00556	4.12e-05	0.00287015	down	--	--	Molecular Function: structural constituent of ribosome (GO:0003735);; Cellular Component: mitochondrial large ribosomal subunit (GO:0005762);; Biological Process: germarium-derived egg chamber formation (GO:0007293);; Biological Process: mitochondrial translation (GO:0032543);; Biological Process: epithelium development (GO:0060429);;	K02916|2e-90|haw:110380835|K02916 RP-L35; large subunit ribosomal protein L35	[S]	Function unknown	Ribosomal protein L35	39S ribosomal protein L35, mitochondrial OS=Drosophila melanogaster OX=7227 GN=mRpL35 PE=2 SV=1	39S ribosomal protein L35, mitochondrial [Spodoptera litura]
TRINITY_DN25371_c0_g1	108.122	1241.84	3.52466	6.56e-06	0.00066537	up	--	--	--	--	--	--	--	--	lipase 3-like [Spodoptera litura]
TRINITY_DN22866_c0_g1	8.90534	61.0201	2.78193	0.000246565	0.0109196	up	--	--	--	--|1e-12|bmor:733028|hypothetical protein	--	--	--	--	thymosin beta isoform X2 [Spodoptera litura]
TRINITY_DN23103_c1_g1	8.53864	229.204	4.73365	0.000307203	0.0128195	up	--	--	Cellular Component: extracellular space (GO:0005615);; Biological Process: circadian rhythm (GO:0007623);;	--|5e-48|haw:110370305|hypothetical protein	--	--	Haemolymph juvenile hormone binding protein (JHBP);; Haemolymph juvenile hormone binding protein (JHBP)	Circadian clock-controlled protein OS=Drosophila melanogaster OX=7227 GN=anon-3B1.2 PE=2 SV=2	uncharacterized protein LOC111357556 [Spodoptera litura]
TRINITY_DN27281_c1_g2	1920.83	755.905	-1.34517	0.00045499	0.016999	down	[R]	General function prediction only	Molecular Function: tRNA binding (GO:0000049);; Molecular Function: mRNA binding (GO:0003729);; Molecular Function: translation initiation factor activity (GO:0003743);; Cellular Component: cytoplasm (GO:0005737);; Biological Process: regulation of translation (GO:0006417);; Cellular Component: cytosolic small ribosomal subunit (GO:0022627);; Molecular Function: ribosome binding (GO:0043022);;	K15026|0.0|haw:110371541|K15026 EIF2A; translation initiation factor 2A	[J]	Translation, ribosomal structure and biogenesis	Eukaryotic translation initiation factor eIF2A	Eukaryotic translation initiation factor 2A OS=Drosophila melanogaster OX=7227 GN=CG7414 PE=1 SV=1	hypothetical protein B5V51_3757 [Heliothis virescens]
TRINITY_DN19979_c0_g1	437.449	2.43749	-7.46564	7.26e-11	3.98e-08	down	--	--	Cellular Component: extracellular region (GO:0005576);; Molecular Function: structural constituent of chitin-based larval cuticle (GO:0008010);; Molecular Function: chitin binding (GO:0008061);; Molecular Function: extracellular matrix constituent conferring elasticity (GO:0030023);; Cellular Component: extracellular matrix (GO:0031012);; Cellular Component: protein-carbohydrate complex (GO:00329…	--|1e-119|haw:110380163|hypothetical protein	--	--	Insect cuticle protein	Pro-resilin OS=Drosophila melanogaster OX=7227 GN=resilin PE=1 SV=1	pro-resilin-like isoform X1 [Spodoptera litura]
TRINITY_DN21637_c0_g2	1.0218	141.177	7.05499	4.87e-06	0.000520891	up	--	--	Molecular Function: serine-type endopeptidase activity (GO:0004252);;	--|9e-51|tnl:113496180|hypothetical protein	[E]	Amino acid transport and metabolism	Trypsin	Serine protease SP24D OS=Anopheles gambiae OX=7165 GN=Sp24D PE=2 SV=3	chymotrypsin-like serine protease precursor [Spodoptera frugiperda]
TRINITY_DN25737_c3_g1	1444.25	369.946	-1.96442	4.31e-05	0.00295938	down	--	--	Molecular Function: structural constituent of ribosome (GO:0003735);; Cellular Component: mitochondrial small ribosomal subunit (GO:0005763);; Biological Process: translation (GO:0006412);; Biological Process: mitochondrial translation (GO:0032543);;	K17404|1e-111|tnl:113495217|K17404 MRPS25; small subunit ribosomal protein S25	[J]	Translation, ribosomal structure and biogenesis	Mitochondrial ribosomal protein L51 / S25 / CI-B8 domain	Probable 28S ribosomal protein S25, mitochondrial OS=Drosophila melanogaster OX=7227 GN=mRpS25 PE=1 SV=1	probable 28S ribosomal protein S25, mitochondrial [Spodoptera litura]
TRINITY_DN21947_c3_g1	21.0309	94.0174	2.16487	0.000839572	0.0263505	up	--	--	--	K00058|6e-14|tnl:113496177|K00058 serA; D-3-phosphoglycerate dehydrogenase / 2-oxoglutarate reductase [EC:1.1.1.95 1.1.1.399]	--	--	--	--	D-3-phosphoglycerate dehydrogenase [Spodoptera litura]
TRINITY_DN20769_c0_g2	7.61091	67.1273	3.11416	0.000126649	0.00669516	up	--	--	--	--|8e-07|haw:110381139|hypothetical protein	--	--	--	--	uncharacterized protein LOC111357762 isoform X1 [Spodoptera litura]
TRINITY_DN28039_c0_g1	312.688	112.292	-1.47537	0.000929337	0.0282404	down	--	--	--	--|1e-122|haw:110379632|hypothetical protein	--	--	--	--	uncharacterized protein LOC111358757 [Spodoptera litura]
TRINITY_DN17825_c0_g1	511.891	147.26	-1.79568	4e-05	0.00282919	down	--	--	Cellular Component: cytoplasm (GO:0005737);; Molecular Function: zinc ion binding (GO:0008270);;	--|1e-168|haw:110376595|hypothetical protein	[R]	General function prediction only	Galactose oxidase, central domain;; Galactose oxidase, central domain;; Kelch motif;; Kelch motif;; Kelch motif;; Kelch motif	RING finger protein B OS=Dictyostelium discoideum OX=44689 GN=rngB PE=2 SV=2	kelch domain-containing protein 4-like [Spodoptera litura]
TRINITY_DN20426_c2_g4	0.775452	174.229	7.89058	2.93e-11	1.74e-08	up	--	--	Molecular Function: DNA binding (GO:0003677);;	--|4e-23|els:114831199|hypothetical protein	--	--	--	Uncharacterized proline-rich protein (Fragment) OS=Owenia fusiformis OX=6347 PE=4 SV=1	hypothetical protein AMSG_10049 [Thecamonas trahens ATCC 50062]
TRINITY_DN18193_c0_g1	1318.16	347.488	-1.9231	0.00172367	0.0431688	down	--	--	Biological Process: cell adhesion (GO:0007155);; Biological Process: integrin-mediated signaling pathway (GO:0007229);; Cellular Component: integrin complex (GO:0008305);; Cellular Component: cell surface (GO:0009986);; Cellular Component: M band (GO:0031430);; Biological Process: regulation of actin cytoskeleton organization (GO:0032956);; Biological Process: positive regulation of locomotion (G…	--|1e-67|haw:110375692|hypothetical protein	--	--	--	Integrin beta pat-3 OS=Caenorhabditis elegans OX=6239 GN=pat-3 PE=1 SV=1	integrin beta-8-like [Spodoptera litura]
TRINITY_DN24286_c1_g1	5114.28	704.957	-2.85887	9.43e-06	0.000901588	down	--	--	--	--|2e-84|haw:110373995|hypothetical protein	[W]	Extracellular structures	FAR-17a/AIG1-like protein	--	androgen-dependent TFPI-regulating protein-like [Spodoptera litura]
TRINITY_DN14463_c0_g1	1.92825	180.336	6.6606	3.88e-05	0.00276029	up	--	--	--	--|3e-35|haw:110370242|hypothetical protein	--	--	Haemolymph juvenile hormone binding protein (JHBP)	--	uncharacterized protein LOC111357557 [Spodoptera litura]
TRINITY_DN20342_c3_g1	9432.98	50.6456	-7.54277	2.11e-17	3.47e-14	down	--	--	Cellular Component: extracellular matrix (GO:0005578);; Cellular Component: collagen trimer (GO:0005581);;	--|1e-165|haw:110384109|hypothetical protein	[W]	Extracellular structures	--	Fibril-forming collagen alpha chain (Fragment) OS=Riftia pachyptila OX=6426 PE=1 SV=2	uncharacterized protein LOC111349366 [Spodoptera litura]
TRINITY_DN18838_c4_g1	8810.57	2176.44	-2.01719	0.000153531	0.00767086	down	--	--	--	--|5e-29|haw:110372624|hypothetical protein	--	--	--	--	MG7 [Spodoptera litura]
TRINITY_DN22733_c0_g1	429.198	24.1439	-4.14822	3.13e-06	0.000365473	down	--	--	--	--|0.0|haw:110381708|hypothetical protein	--	--	Immunoglobulin domain	--	uncharacterized protein LOC110381708 [Helicoverpa armigera]
TRINITY_DN28855_c1_g1	5178.89	1594.42	-1.69969	0.000605451	0.0209315	down	--	--	--	--|2e-45|haw:110384210|hypothetical protein	--	--	--	--	PDZ and LIM domain protein 3 isoform X4 [Spodoptera litura]
TRINITY_DN16399_c0_g1	55.9037	7.35181	-2.91546	0.000113433	0.00620549	down	--	--	Molecular Function: actin binding (GO:0003779);; Cellular Component: cytosol (GO:0005829);; Cellular Component: plasma membrane (GO:0005886);; Biological Process: mitotic cell cycle (GO:0007067);; Biological Process: female germline ring canal formation (GO:0007301);; Biological Process: cytoplasmic transport, nurse cell to oocyte (GO:0007303);; Biological Process: learning or memory (GO:0007611)…	K04437|7e-95|bmor:105842727|K04437 FLNA; filamin	[Z]	Cytoskeleton	Filamin/ABP280 repeat	Filamin-A OS=Drosophila melanogaster OX=7227 GN=cher PE=1 SV=2	filamin-A-like [Bombyx mori]
TRINITY_DN17337_c0_g1	659.528	167.245	-1.97792	9.44e-05	0.00549938	down	[J]	Translation, ribosomal structure and biogenesis	--	K02919|3e-27|cqu:CpipJ_CPIJ009257|K02919 RP-L36; large subunit ribosomal protein L36	[J]	Translation, ribosomal structure and biogenesis	Ribosomal protein L36	--	PREDICTED: 39S ribosomal protein L36, mitochondrial [Amyelois transitella]
TRINITY_DN17658_c0_g1	2542.8	842.717	-1.59304	0.000390535	0.0152207	down	--	--	Cellular Component: cytoplasm (GO:0005737);; Biological Process: protein folding (GO:0006457);; Biological Process: phagocytosis (GO:0006909);; Cellular Component: prefoldin complex (GO:0016272);; Molecular Function: protein binding involved in protein folding (GO:0044183);; Biological Process: establishment or maintenance of neuroblast polarity (GO:0045196);; Biological Process: oogenesis (GO:00…	K09549|6e-84|haw:110382596|K09549 PFDN2; prefoldin subunit 2	[O]	Posttranslational modification, protein turnover, chaperones	Prefoldin subunit	Probable prefoldin subunit 2 OS=Drosophila melanogaster OX=7227 GN=Pfdn2 PE=2 SV=1	prefoldin subunit 2 [Spodoptera litura]
TRINITY_DN27561_c1_g1	528.646	184.233	-1.51913	0.00152188	0.0400091	down	[LKJ]	--	--	K20096|0.0|haw:110382343|K20096 DDX28; ATP-dependent RNA helicase DDX28 [EC:3.6.4.13]	[A]	RNA processing and modification	DEAD/DEAH box helicase;; Helicase conserved C-terminal domain;; SNF2 family N-terminal domain	Probable ATP-dependent RNA helicase vasa-like OS=Litopenaeus vannamei OX=6689 GN=vasa PE=2 SV=2	probable ATP-dependent RNA helicase DDX28 [Spodoptera litura]
TRINITY_DN25284_c0_g2	694.653	213.806	-1.69942	7.93e-05	0.00481587	down	[O]	Posttranslational modification, protein turnover, chaperones	Molecular Function: ATP-dependent peptidase activity (GO:0004176);; Molecular Function: serine-type endopeptidase activity (GO:0004252);; Molecular Function: ATP binding (GO:0005524);; Cellular Component: mitochondrial matrix (GO:0005759);; Biological Process: protein quality control for misfolded or incompletely synthesized proteins (GO:0006515);; Biological Process: mitochondrion organization (…	K08675|2e-28|tnl:113493795|K08675 PRSS15; ATP-dependent Lon protease [EC:3.4.21.53]	[O]	Posttranslational modification, protein turnover, chaperones	Lon protease (S16) C-terminal proteolytic domain	Lon protease homolog, mitochondrial OS=Caenorhabditis briggsae OX=6238 GN=lonp-1 PE=3 SV=5	lon protease homolog, mitochondrial isoform X3 [Spodoptera litura]
TRINITY_DN23236_c0_g1	6.01546	92.2723	3.94687	0.00036056	0.0144556	up	--	--	Molecular Function: serine-type endopeptidase activity (GO:0004252);; Cellular Component: extracellular region (GO:0005576);; Biological Process: collagen catabolic process (GO:0030574);;	--|3e-55|haw:110384484|hypothetical protein	[E]	Amino acid transport and metabolism	Trypsin	Collagenase OS=Hypoderma lineatum OX=7389 PE=1 SV=3	collagenase-like [Spodoptera litura]
TRINITY_DN28663_c1_g1	497.544	114.838	-2.11523	0.000733682	0.023835	down	--	--	--	--	--	--	--	--	tubulin beta chain-like [Spodoptera litura]
TRINITY_DN28601_c2_g1	83.78	2731.81	5.02762	2.01e-26	1.19e-22	up	[G]	Carbohydrate transport and metabolism	Biological Process: carbohydrate metabolic process (GO:0005975);; Molecular Function: thioglucosidase activity (GO:0019137);; Molecular Function: metal ion binding (GO:0046872);;	--|1e-138|haw:110381159|hypothetical protein	[G]	Carbohydrate transport and metabolism	Glycosyl hydrolase family 1	Myrosinase 1 OS=Brevicoryne brassicae OX=69196 PE=1 SV=1	myrosinase 1-like [Spodoptera litura]
TRINITY_DN27622_c2_g3	807.977	167.972	-2.26728	0.00194492	0.0466971	down	--	--	Molecular Function: serine-type endopeptidase activity (GO:0004252);; Cellular Component: extracellular region (GO:0005576);; Biological Process: proteolysis (GO:0006508);; Biological Process: innate immune response (GO:0045087);;	--|3e-69|haw:110375430|hypothetical protein	--	--	Low-density lipoprotein receptor domain class A;; Chitin binding Peritrophin-A domain	Modular serine protease OS=Drosophila melanogaster OX=7227 GN=modSP PE=1 SV=2	hypothetical protein B5V51_3833 [Heliothis virescens]
TRINITY_DN17761_c0_g1	391.512	2.67943	-7.16791	9.29e-10	3.72e-07	down	--	--	Molecular Function: structural constituent of cuticle (GO:0042302);;	--|1e-111|haw:110370179|hypothetical protein	--	--	--	Cuticle protein 38 OS=Locusta migratoria OX=7004 PE=1 SV=1	cuticle protein 38-like [Spodoptera litura]
TRINITY_DN29125_c0_g1	24398.9	1.76961	-13.7644	5.04e-17	7.11e-14	down	--	--	Cellular Component: SAGA complex (GO:0000124);; Molecular Function: transcription coregulator activity (GO:0003712);;	--|0.0|haw:110381136|hypothetical protein	[KTDL]	--	--	Transcription factor SPT20 homolog OS=Dictyostelium discoideum OX=44689 GN=DDB_G0280065 PE=3 SV=1	mediator of RNA polymerase II transcription subunit 15-like [Spodoptera litura]
TRINITY_DN24501_c0_g2	1175.32	436.717	-1.42869	0.000116509	0.00629914	down	--	--	--	--|4e-36|haw:110370566|hypothetical protein	[S]	Function unknown	--	Trimeric intracellular cation channel type 1B.1 OS=Caenorhabditis elegans OX=6239 GN=tric-1B.1 PE=1 SV=2	trimeric intracellular cation channel type 1B.1 [Spodoptera litura]
TRINITY_DN14889_c0_g1	508.425	148.423	-1.77482	0.000223229	0.0101595	down	--	--	--	K18171|6e-73|haw:110382791|K18171 CMC1; COX assembly mitochondrial protein 1	[S]	Function unknown	Cytochrome c oxidase biogenesis protein Cmc1 like	--	COX assembly mitochondrial protein homolog [Spodoptera litura]
TRINITY_DN13054_c0_g1	556.09	180.046	-1.62578	0.000398872	0.015432	down	--	--	--	--|2e-27|pxy:105380415|hypothetical protein	--	--	Cytochrome oxidase c assembly	--	hypothetical protein RR46_09970 [Papilio xuthus]
TRINITY_DN23919_c0_g1	6929.37	1296.69	-2.41773	3.77e-09	1.3e-06	down	--	--	Cellular Component: mitochondrial matrix (GO:0005759);;	K15414|1e-138|haw:110383493|K15414 C1QBP; complement component 1 Q subcomponent-binding protein, mitochondrial	[V]	Defense mechanisms	Mitochondrial glycoprotein	Conserved regulator of innate immunity protein 3 OS=Caenorhabditis elegans OX=6239 GN=cri-3 PE=1 SV=2	complement component 1 Q subcomponent-binding protein, mitochondrial [Spodoptera litura]
TRINITY_DN20003_c0_g2	6732.36	1.62493	-12.0262	0.00144011	0.0384047	down	--	--	Molecular Function: structural constituent of cuticle (GO:0042302);;	--|5e-45|tnl:113499641|hypothetical protein	--	--	--	Cuticle protein OS=Anopheles gambiae OX=7165 GN=Ccp84Ab PE=2 SV=3	larval cuticle protein A2B-like [Spodoptera litura]
TRINITY_DN22835_c0_g1	12.4599	178.264	3.82365	0.000166562	0.00815687	up	--	--	--	--|0.0|haw:110376766|hypothetical protein	[E]	Amino acid transport and metabolism	Trypsin;; Trypsin-like peptidase domain	Protein masquerade OS=Drosophila melanogaster OX=7227 GN=mas PE=1 SV=1	serine proteinase stubble isoform X1 [Spodoptera litura]
TRINITY_DN13513_c0_g1	0	17.8748	6.44513	4.46e-05	0.00302995	up	[J]	Translation, ribosomal structure and biogenesis	Molecular Function: structural constituent of ribosome (GO:0003735);; Cellular Component: cytosol (GO:0005829);; Cellular Component: ribosome (GO:0005840);; Biological Process: translation (GO:0006412);;	K02984|1e-85|slal:111672715|K02984 RP-S3Ae; small subunit ribosomal protein S3Ae	[J]	Translation, ribosomal structure and biogenesis	Ribosomal S3Ae family	40S ribosomal protein S3a OS=Nematostella vectensis OX=45351 GN=v1g242621 PE=3 SV=1	ribosomal protein S3a [Capsaspora owczarzaki ATCC 30864]
TRINITY_DN23371_c0_g1	2860.92	1185.49	-1.27089	0.00164155	0.0420644	down	[O]	Posttranslational modification, protein turnover, chaperones	--	K08956|0.0|haw:110373719|K08956 AFG3; AFG3 family protein [EC:3.4.24.-]	[O]	Posttranslational modification, protein turnover, chaperones	Peptidase family M41;; ATPase family associated with various cellular activities (AAA);; FtsH Extracellular;; AAA domain (dynein-related subfamily)	AFG3-like protein spg-7 OS=Caenorhabditis elegans OX=6239 GN=spg-7 PE=3 SV=2	AFG3-like protein 2 [Spodoptera litura]
TRINITY_DN27135_c1_g1	1601.11	481.117	-1.7348	0.000674852	0.0223903	down	[G]	Carbohydrate transport and metabolism	Biological Process: carbohydrate metabolic process (GO:0005975);; Molecular Function: thioglucosidase activity (GO:0019137);; Molecular Function: metal ion binding (GO:0046872);;	--|0.0|haw:110381159|hypothetical protein	[G]	Carbohydrate transport and metabolism	Glycosyl hydrolase family 1	Myrosinase 1 OS=Brevicoryne brassicae OX=69196 PE=1 SV=1	myrosinase 1-like isoform X2 [Spodoptera litura]
TRINITY_DN29368_c0_g2	7602.59	782.392	-3.2805	8.99e-07	0.000133873	down	[O]	Posttranslational modification, protein turnover, chaperones	Molecular Function: cysteine-type endopeptidase activity (GO:0004197);; Cellular Component: extracellular space (GO:0005615);; Cellular Component: lysosome (GO:0005764);; Biological Process: proteolysis (GO:0006508);; Biological Process: digestion (GO:0007586);; Molecular Function: peptidase activity (GO:0008233);; Biological Process: salivary gland cell autophagic cell death (GO:0035071);; Cellu…	--|1e-131|haw:110377415|hypothetical protein	[O]	Posttranslational modification, protein turnover, chaperones	Papain family cysteine protease;; Cathepsin propeptide inhibitor domain (I29)	Cathepsin L OS=Drosophila melanogaster OX=7227 GN=Cp1 PE=2 SV=2	putative C1A cysteine protease precursor [Spodoptera frugiperda]
TRINITY_DN22890_c0_g1	682.278	2026.6	1.5712	0.000109627	0.00608245	up	[G]	Carbohydrate transport and metabolism	Molecular Function: alpha-L-fucosidase activity (GO:0004560);; Cellular Component: cytoplasm (GO:0005737);; Biological Process: fucose metabolic process (GO:0006004);; Biological Process: glycosaminoglycan catabolic process (GO:0006027);; Biological Process: defense response to bacterium (GO:0042742);; Molecular Function: fucose binding (GO:0042806);;	K01206|1e-129|haw:110371508|K01206 FUCA; alpha-L-fucosidase [EC:3.2.1.51]	[G]	Carbohydrate transport and metabolism	Alpha-L-fucosidase;; Alpha-L-fucosidase	Putative alpha-L-fucosidase OS=Drosophila melanogaster OX=7227 GN=Fuca PE=2 SV=2	tissue alpha-L-fucosidase-like [Spodoptera litura]
TRINITY_DN26403_c3_g1	76.0851	20.4384	-1.88967	0.00139578	0.0377664	down	--	--	--	--|0.0|haw:110372852|hypothetical protein	--	--	--	--	beta-3 adrenergic receptor-like [Spodoptera litura]
TRINITY_DN24964_c0_g1	466.109	100.807	-2.209	1.01e-07	2.07e-05	down	[I]	Lipid transport and metabolism	Molecular Function: carboxylic ester hydrolase activity (GO:0052689);;	--|0.0|haw:110375864|hypothetical protein	[R]	General function prediction only	Carboxylesterase family;; alpha/beta hydrolase fold	Esterase FE4 OS=Myzus persicae OX=13164 PE=1 SV=1	esterase FE4-like [Spodoptera litura]
TRINITY_DN26195_c1_g1	4.31228	304.616	6.19757	1.76e-16	2.27e-13	up	--	--	Cellular Component: plasma membrane (GO:0005886);; Biological Process: cell adhesion (GO:0007155);; Cellular Component: anchored component of membrane (GO:0031225);;	K19720|3e-16|dvi:Dvir_GJ26607|K19720 COL3A; collagen, type III, alpha	--	--	--	Merozoite surface antigen 2 OS=Plasmodium falciparum (isolate Nig32 / Nigeria) OX=70150 GN=MSA2 PE=2 SV=1	circumsporozoite protein-like isoform X2 [Spodoptera litura]
TRINITY_DN22814_c4_g2	1188.61	412.711	-1.52561	0.00167407	0.0425015	down	[J]	Translation, ribosomal structure and biogenesis	--	K02876|1e-133|haw:110371942|K02876 RP-L15; large subunit ribosomal protein L15	[J]	Translation, ribosomal structure and biogenesis	Ribosomal proteins 50S-L15, 50S-L18e, 60S-L27A	--	39S ribosomal protein L15, mitochondrial [Spodoptera litura]
TRINITY_DN28050_c0_g1	1276.62	510.809	-1.32178	0.000571304	0.0199842	down	--	--	Cellular Component: cytoplasm (GO:0005737);; Biological Process: intracellular distribution of mitochondria (GO:0048312);;	K03255|0.0|haw:110375891|K03255 TIF31; protein TIF31	[R]	General function prediction only	Clustered mitochondria;; Translation initiation factor eIF3 subunit 135;; Mitochondrial function, CLU-N-term	Clustered mitochondria protein homolog OS=Aedes aegypti OX=7159 GN=AAEL000794 PE=3 SV=1	clustered mitochondria protein homolog isoform X1 [Spodoptera litura]
TRINITY_DN32266_c10_g1	22.9192	537	4.5487	5.99e-14	5.37e-11	up	--	--	--	--|1e-149|btab:109042776|hypothetical protein	--	--	--	--	uncharacterized protein LOC111351706 [Spodoptera litura]
TRINITY_DN31621_c1_g1	3459.79	1095.47	-1.65895	0.000817068	0.0258633	down	[G]	Carbohydrate transport and metabolism	Biological Process: polysaccharide catabolic process (GO:0000272);; Molecular Function: chitinase activity (GO:0004568);; Cellular Component: extracellular region (GO:0005576);; Biological Process: chitin catabolic process (GO:0006032);; Molecular Function: chitin binding (GO:0008061);;	K01183|0.0|haw:110378516|K01183 E3.2.1.14; chitinase [EC:3.2.1.14]	[G]	Carbohydrate transport and metabolism	Glycosyl hydrolases family 18;; Chitin binding Peritrophin-A domain	Probable chitinase 10 OS=Drosophila melanogaster OX=7227 GN=Cht10 PE=2 SV=2	probable chitinase 10 [Spodoptera litura]
TRINITY_DN24583_c1_g1	65.2743	238.35	1.86942	0.000619403	0.021364	up	--	--	--	--|7e-16|haw:110377727|hypothetical protein	--	--	--	--	uncharacterized protein LOC110377727 [Helicoverpa armigera]
TRINITY_DN28140_c0_g1	2257.71	276.421	-3.03041	7.6e-08	1.66e-05	down	--	--	Molecular Function: cytokine activity (GO:0005125);; Molecular Function: transforming growth factor beta receptor binding (GO:0005160);; Cellular Component: extracellular space (GO:0005615);; Biological Process: transforming growth factor beta receptor signaling pathway (GO:0007179);; Biological Process: response to temperature stimulus (GO:0009266);; Biological Process: positive regulation of ge…	K05497|0.0|tnl:113498017|K05497 MSTN; growth differentiation factor 8	[T]	Signal transduction mechanisms	Transforming growth factor beta like domain	Dauer larva development regulatory growth factor daf-7 OS=Caenorhabditis elegans OX=6239 GN=daf-7 PE=1 SV=1	growth/differentiation factor 8-like, partial [Spodoptera litura]
TRINITY_DN17877_c0_g1	0.293391	11.991	4.90832	0.00163061	0.041887	up	[P]	Inorganic ion transport and metabolism	Molecular Function: ATP binding (GO:0005524);; Cellular Component: plasma membrane (GO:0005886);; Biological Process: ATP biosynthetic process (GO:0006754);; Molecular Function: proton-exporting ATPase activity, phosphorylative mechanism (GO:0008553);; Biological Process: proton transmembrane transport (GO:0015992);; Cellular Component: membrane (GO:0016020);; Cellular Component: integral compone…	K01535|3e-73|pcad:112062933|K01535 PMA1; H+-transporting ATPase [EC:7.1.2.1]	[P]	Inorganic ion transport and metabolism	E1-E2 ATPase;; haloacid dehalogenase-like hydrolase;; Cation transporter/ATPase, N-terminus	Probable plasma membrane ATPase OS=Dictyostelium discoideum OX=44689 GN=patB PE=2 SV=2	PREDICTED: plasma membrane ATPase-like [Rhagoletis zephyria]
TRINITY_DN17190_c0_g1	50.7288	1.31786	-5.23224	0.00195775	0.0469671	down	--	--	--	--|3e-66|tnl:113499611|hypothetical protein	--	--	Domain of unknown function (DUF4779)	--	Uncharacterized protein OBRU01_10274 [Operophtera brumata]
TRINITY_DN15984_c0_g5	0	16.8463	6.36066	6.96e-05	0.00433072	up	[C]	Energy production and conversion	Molecular Function: aconitate hydratase activity (GO:0003994);; Cellular Component: mitochondrion (GO:0005739);; Biological Process: tricarboxylic acid cycle (GO:0006099);; Molecular Function: metal ion binding (GO:0046872);; Molecular Function: 4 iron, 4 sulfur cluster binding (GO:0051539);;	K01681|0.0|cscu:111637436|K01681 ACO; aconitate hydratase [EC:4.2.1.3]	[CE]	--	Aconitase family (aconitate hydratase);; Aconitase C-terminal domain	Probable aconitate hydratase, mitochondrial OS=Caenorhabditis elegans OX=6239 GN=aco-2 PE=3 SV=2	aconitate hydratase, mitochondrial-like [Orbicella faveolata]
TRINITY_DN32264_c6_g2	4.74481	85.4306	4.12451	1.7e-06	0.000224228	up	--	--	Molecular Function: DNA binding (GO:0003677);; Cellular Component: nucleus (GO:0005634);;	--|2e-85|csol:105368348|hypothetical protein	--	--	--	Myb-like protein X OS=Dictyostelium discoideum OX=44689 GN=mybX PE=3 SV=1	titin-like isoform X2 [Spodoptera litura]
TRINITY_DN25852_c0_g1	1357.01	447.401	-1.60039	0.000270367	0.0116793	down	--	--	--	K17413|0.0|haw:110378632|K17413 MRPS35; small subunit ribosomal protein S35	[J]	Translation, ribosomal structure and biogenesis	Mitochondrial ribosomal subunit protein	--	28S ribosomal protein S35, mitochondrial [Spodoptera litura]
TRINITY_DN32246_c8_g1	335.86	106.002	-1.66305	0.000635191	0.0215637	down	--	--	--	--	--	--	--	--	zinc finger protein 841-like [Spodoptera litura]
TRINITY_DN26155_c1_g1	2.27932	43.6713	4.28789	1.94e-05	0.00158583	up	--	--	--	--	--	--	--	--	unknown unsecreted protein [Papilio xuthus]
TRINITY_DN27578_c0_g2	391.425	107.889	-1.85834	0.000631504	0.021506	down	--	--	--	--|1e-36|haw:110382286|hypothetical protein	--	--	--	--	uncharacterized protein LOC111352646 [Spodoptera litura]
TRINITY_DN26251_c0_g1	451.259	52.1221	-3.11242	5.28e-05	0.00343344	down	--	--	Molecular Function: structural constituent of cell wall (GO:0005199);; Cellular Component: intracellular (GO:0005622);; Molecular Function: cellulose binding (GO:0030248);; Biological Process: sporulation resulting in formation of a cellular spore (GO:0030435);; Cellular Component: spore wall (GO:0031160);; Biological Process: spore wall assembly (GO:0042244);; Cellular Component: glycoprotein co…	--|6e-55|haw:110370484|hypothetical protein	--	--	--	Spore coat protein SP85 OS=Dictyostelium discoideum OX=44689 GN=pspB PE=1 SV=2	proline-rich extensin-like protein EPR1 [Spodoptera litura]
TRINITY_DN23335_c0_g2	1364.06	443.327	-1.62122	0.00185648	0.0452333	down	--	--	--	--|0.0|haw:110371695|hypothetical protein	[I]	Lipid transport and metabolism	CRAL/TRIO domain	--	clavesin-1-like [Spodoptera litura]
TRINITY_DN18395_c0_g1	1430.69	386.451	-1.88765	6.91e-06	0.000689609	down	--	--	--	K17424|1e-117|haw:110380108|K17424 MRPL43; large subunit ribosomal protein L43	[J]	Translation, ribosomal structure and biogenesis	Mitochondrial ribosomal protein L51 / S25 / CI-B8 domain	--	39S ribosomal protein L43, mitochondrial [Spodoptera litura]
TRINITY_DN17169_c0_g1	922.58	235.564	-1.96917	8.51e-05	0.00511543	down	[ER]	--	Molecular Function: nucleotide binding (GO:0000166);; Cellular Component: cytoplasm (GO:0005737);; Biological Process: uracil catabolic process (GO:0006212);; Biological Process: thymidine catabolic process (GO:0006214);; Molecular Function: dihydropyrimidine dehydrogenase (NADP+) activity (GO:0017113);; Biological Process: beta-alanine biosynthetic process (GO:0019483);; Molecular Function: meta…	K00207|0.0|haw:110372024|K00207 DPYD; dihydropyrimidine dehydrogenase (NADP+) [EC:1.3.1.2]	[F]	Nucleotide transport and metabolism	Pyridine nucleotide-disulphide oxidoreductase	Dihydropyrimidine dehydrogenase [NADP(+)] OS=Caenorhabditis elegans OX=6239 GN=dpyd-1 PE=3 SV=2	dihydropyrimidine dehydrogenase [NADP(+)] [Spodoptera litura]
TRINITY_DN21509_c0_g1	465.754	132.475	-1.81296	4.36e-05	0.00297435	down	[J]	Translation, ribosomal structure and biogenesis	Biological Process: ribosomal large subunit assembly (GO:0000027);; Molecular Function: structural constituent of ribosome (GO:0003735);; Cellular Component: mitochondrial large ribosomal subunit (GO:0005762);; Biological Process: translation (GO:0006412);; Biological Process: regulation of translation (GO:0006417);; Molecular Function: rRNA binding (GO:0019843);; Biological Process: gene silenci…	K02867|1e-132|haw:110378595|K02867 RP-L11; large subunit ribosomal protein L11	[J]	Translation, ribosomal structure and biogenesis	Ribosomal protein L11, N-terminal domain;; Ribosomal protein L11, RNA binding domain	39S ribosomal protein L11, mitochondrial OS=Drosophila melanogaster OX=7227 GN=mRpL11 PE=1 SV=1	39S ribosomal protein L11, mitochondrial [Spodoptera litura]
TRINITY_DN31186_c1_g1	30.3521	1491.5	5.60924	8.64e-10	3.51e-07	up	[P]	Inorganic ion transport and metabolism	Molecular Function: nitric-oxide synthase activity (GO:0004517);; Molecular Function: iron ion binding (GO:0005506);; Biological Process: nitric oxide biosynthetic process (GO:0006809);; Molecular Function: FMN binding (GO:0010181);; Molecular Function: heme binding (GO:0020037);; Molecular Function: flavin adenine dinucleotide binding (GO:0050660);; Molecular Function: NADP binding (GO:0050661);;	K13240|0.0|haw:110378714|K13240 NOS1; nitric-oxide synthase, brain [EC:1.14.13.39]	[C]	Energy production and conversion	FAD binding domain;; Oxidoreductase NAD-binding domain;; Flavodoxin;; Nitric oxide synthase, oxygenase domain	Nitric oxide synthase-like protein OS=Bombyx mori OX=7091 GN=NSL PE=2 SV=1	nitric oxide synthase-like protein isoform X1 [Spodoptera litura]
TRINITY_DN19457_c0_g1	18412.9	404.179	-5.50954	7.03e-11	3.93e-08	down	--	--	--	--|8e-15|haw:110384121|hypothetical protein	--	--	--	--	endocuticle structural glycoprotein SgAbd-5-like isoform X1 [Spodoptera litura]
TRINITY_DN26242_c5_g3	6190.38	520.037	-3.57361	2.69e-13	2.16e-10	down	--	--	Molecular Function: extracellular matrix structural constituent (GO:0005201);; Cellular Component: collagen trimer (GO:0005581);; Cellular Component: basement membrane (GO:0005604);;	K06237|1e-108|haw:110380370|K06237 COL4A; collagen, type IV, alpha	[W]	Extracellular structures	C-terminal tandem repeated domain in type 4 procollagen	Collagen alpha-2(IV) chain OS=Ascaris suum OX=6253 PE=2 SV=1	collagen alpha-1(IV) chain [Spodoptera litura]
TRINITY_DN32162_c7_g1	3264.5	316.561	-3.36662	9.3e-05	0.00544713	down	--	--	Biological Process: negative regulation of transcription by RNA polymerase II (GO:0000122);; Biological Process: cell fate specification (GO:0001708);; Biological Process: compound eye morphogenesis (GO:0001745);; Biological Process: defense response to insect (GO:0002213);; Molecular Function: chromatin binding (GO:0003682);; Molecular Function: signaling receptor activity (GO:0004872);; Molecul…	K23342|0.0|tnl:113503284|K23342 FBN2_3; fibrillin 2/3	[T]	Signal transduction mechanisms	Calcium-binding EGF domain;; Complement Clr-like EGF-like;; EGF-like domain;; TB domain;; Human growth factor-like EGF;; Coagulation Factor Xa inhibitory site;; EGF domain	Neurogenic locus Notch protein OS=Drosophila melanogaster OX=7227 GN=N PE=1 SV=3	fibrillin-1-like isoform X2 [Spodoptera litura]
TRINITY_DN25654_c1_g6	31.069	0	-7.62166	0.000147228	0.00746909	down	--	--	Molecular Function: structural constituent of cuticle (GO:0042302);;	--|6e-39|haw:110377486|hypothetical protein	--	--	--	Pupal cuticle protein C1B OS=Tenebrio molitor OX=7067 PE=1 SV=1	cuticle protein 16.5-like [Spodoptera litura]
TRINITY_DN19249_c1_g3	2886.67	1107.89	-1.38155	0.000434608	0.016394	down	--	--	--	K03938|7e-59|haw:110371251|K03938 NDUFS5; NADH dehydrogenase (ubiquinone) Fe-S protein 5	[C]	Energy production and conversion	NADH:ubiquinone oxidoreductase, NDUFS5-15kDa	--	NADH dehydrogenase [ubiquinone] iron-sulfur protein 5-like [Spodoptera litura]
TRINITY_DN25202_c2_g2	3057.07	412.753	-2.88875	0.00135118	0.0369307	down	--	--	Biological Process: multicellular organism development (GO:0007275);; Biological Process: myoblast fusion (GO:0007520);; Cellular Component: membrane (GO:0016020);; Cellular Component: integral component of membrane (GO:0016021);;	--|1e-173|tnl:113501732|hypothetical protein	--	--	--	Protein rolling stone OS=Drosophila melanogaster OX=7227 GN=rost PE=2 SV=2	protein rolling stone-like isoform X2 [Spodoptera litura]
TRINITY_DN27716_c2_g1	154.381	1324.85	3.10174	0.000191959	0.00915841	up	[ER]	--	Molecular Function: L-iditol 2-dehydrogenase activity (GO:0003939);; Molecular Function: zinc ion binding (GO:0008270);;	K00008|1e-153|haw:110376916|K00008 SORD; L-iditol 2-dehydrogenase [EC:1.1.1.14]	[Q]	Secondary metabolites biosynthesis, transport and catabolism	Alcohol dehydrogenase GroES-like domain;; Zinc-binding dehydrogenase	Sorbitol dehydrogenase OS=Bombyx mori OX=7091 GN=SDH PE=2 SV=1	sorbitol dehydrogenase-like [Spodoptera litura]
TRINITY_DN30452_c3_g4	4911.01	1317.79	-1.89785	0.000624723	0.0214046	down	--	--	--	--	--	--	--	--	lipoyltransferase 1, mitochondrial isoform X2 [Spodoptera litura]
TRINITY_DN18505_c0_g1	265.176	89.2546	-1.56836	0.00164697	0.042066	down	--	--	--	--|5e-91|haw:110375502|hypothetical protein	--	--	Transmembrane protein 223	--	transmembrane protein 223 [Spodoptera litura]
TRINITY_DN32227_c10_g1	4420.26	1745.54	-1.34046	0.00181228	0.044565	down	--	--	Molecular Function: ryanodine-sensitive calcium-release channel activity (GO:0005219);; Molecular Function: calcium ion binding (GO:0005509);; Cellular Component: microtubule associated complex (GO:0005875);; Cellular Component: plasma membrane (GO:0005886);; Biological Process: calcium ion transport (GO:0006816);; Biological Process: muscle contraction (GO:0006936);; Biological Process: multicel…	K04962|0.0|tnl:113505095|K04962 RYR2; ryanodine receptor 2	[T]	Signal transduction mechanisms	RIH domain;; RyR domain;; SPRY domain;; Inositol 1,4,5-trisphosphate/ryanodine receptor;; Ryanodine Receptor TM 4-6;; MIR domain;; RyR and IP3R Homology associated;; Ion transport protein	Ryanodine receptor OS=Drosophila melanogaster OX=7227 GN=RyR PE=1 SV=3	ryanodine receptor [Spodoptera exigua]
TRINITY_DN28006_c0_g1	4164.53	84.3881	-5.62447	6.3e-05	0.00398008	down	[I]	Lipid transport and metabolism	Molecular Function: juvenile-hormone esterase activity (GO:0004453);;	K01049|1e-143|tnl:113505877|K01049 ACHE; acetylcholinesterase [EC:3.1.1.7]	[R]	General function prediction only	Carboxylesterase family	Juvenile hormone esterase OS=Heliothis virescens OX=7102 PE=1 SV=2	juvenile hormone esterase-like [Spodoptera litura]
TRINITY_DN21271_c2_g1	707.203	166.924	-2.08236	0.000175429	0.00850673	down	--	--	--	--|1e-124|tnl:113504212|hypothetical protein	[W]	Extracellular structures	FAR-17a/AIG1-like protein	--	androgen-dependent TFPI-regulating protein-like [Spodoptera litura]
TRINITY_DN29276_c1_g2	884.621	39.8273	-4.47352	0.000507678	0.0182321	down	--	--	--	K09428|1e-153|haw:110374646|K09428 ELF1_2_4; E74-like factor 1/2/4	--	--	--	--	ecdysone-induced protein 74EF isoform X1 [Spodoptera litura]
TRINITY_DN30214_c0_g1	2435.57	663.716	-1.87542	0.00067783	0.0224639	down	[R]	General function prediction only	Molecular Function: ATP binding (GO:0005524);; Cellular Component: mitochondrial matrix (GO:0005759);; Biological Process: protein folding (GO:0006457);;	--|0.0|haw:110370160|hypothetical protein	[R]	General function prediction only	Oxidoreductase family, NAD-binding Rossmann fold;; Chaperonin 10 Kd subunit	10 kDa heat shock protein, mitochondrial OS=Schistosoma japonicum OX=6182 GN=SJCHGC01960 PE=3 SV=2	glucose-fructose oxidoreductase domain-containing protein 1 [Spodoptera litura]
TRINITY_DN24424_c1_g2	38.3833	279.876	2.86115	3.03e-05	0.00227031	up	--	--	--	--|2e-48|tnl:113500854|hypothetical protein	--	--	Spaetzle	--	uncharacterized protein LOC111355514 [Spodoptera litura]
TRINITY_DN22272_c2_g2	1.06884	78.2424	6.18637	9.26e-05	0.00544135	up	--	--	--	--	--	--	--	--	nucleolar protein 56 [Spodoptera litura]
TRINITY_DN24436_c0_g1	40.5714	9.90799	-2.02383	0.00172934	0.0432157	down	--	--	Biological Process: multicellular organism development (GO:0007275);; Biological Process: myoblast fusion (GO:0007520);; Cellular Component: membrane (GO:0016020);; Cellular Component: integral component of membrane (GO:0016021);;	--|3e-32|haw:110378572|hypothetical protein	--	--	--	Protein rolling stone OS=Drosophila melanogaster OX=7227 GN=rost PE=2 SV=2	protein rolling stone-like [Spodoptera litura]
TRINITY_DN21955_c4_g1	5689.26	901.319	-2.65824	1.82e-07	3.5e-05	down	--	--	Molecular Function: structural constituent of cuticle (GO:0042302);;	--|5e-94|tnl:113502438|hypothetical protein	--	--	Insect cuticle protein	Cuticle protein 3 OS=Lonomia obliqua OX=304329 PE=1 SV=2	cuticle protein 3-like [Spodoptera litura]
TRINITY_DN17621_c0_g1	6.45048	81.6568	3.68053	1.23e-07	2.52e-05	up	--	--	Cellular Component: extracellular region (GO:0005576);; Molecular Function: structural constituent of chitin-based larval cuticle (GO:0008010);; Molecular Function: chitin binding (GO:0008061);; Molecular Function: extracellular matrix constituent conferring elasticity (GO:0030023);; Cellular Component: extracellular matrix (GO:0031012);; Cellular Component: protein-carbohydrate complex (GO:00329…	--|0.0|haw:110371510|hypothetical protein	--	--	Domain of unknown function (DUF4795)	Pro-resilin OS=Drosophila melanogaster OX=7227 GN=resilin PE=1 SV=1	uncharacterized protein LOC111351582 isoform X2 [Spodoptera litura]
TRINITY_DN21331_c6_g1	7696.05	8.23126	-9.86882	3.93e-15	4.31e-12	down	--	--	Molecular Function: structural constituent of cuticle (GO:0042302);;	--|2e-28|haw:110384148|hypothetical protein	--	--	--	Flexible cuticle protein 12 OS=Hyalophora cecropia OX=7123 GN=CP12 PE=2 SV=1	endocuticle structural glycoprotein SgAbd-5-like [Spodoptera litura]
TRINITY_DN22514_c0_g1	2.18524	90.3267	5.35498	2.91e-06	0.000347081	up	--	--	--	--|5e-09|bmor:105842367|hypothetical protein	--	--	--	--	uncharacterized protein LOC111348857 [Spodoptera litura]
TRINITY_DN30934_c0_g3	1325.48	393.699	-1.75087	0.000273402	0.0117738	down	[I]	Lipid transport and metabolism	Molecular Function: cholinesterase activity (GO:0004104);;	--|1e-114|tnl:113508046|hypothetical protein	[R]	General function prediction only	Carboxylesterase family	Cholinesterase 1 (Fragment) OS=Branchiostoma lanceolatum OX=7740 GN=CHE1 PE=3 SV=1	carboxylesterase CXE30 [Spodoptera littoralis]
TRINITY_DN31944_c4_g2	411.037	1362.71	1.72851	0.000783341	0.0250635	up	[ER]	--	Biological Process: sodium ion transport (GO:0006814);; Molecular Function: symporter activity (GO:0015293);; Cellular Component: integral component of membrane (GO:0016021);;	--|0.0|haw:110383820|hypothetical protein	[P]	Inorganic ion transport and metabolism	Sodium:solute symporter family;; Lipase	Putative sodium-dependent multivitamin transporter OS=Drosophila melanogaster OX=7227 GN=CG32669 PE=2 SV=1	sodium-coupled monocarboxylate transporter 1-like isoform X1 [Spodoptera litura]
TRINITY_DN20469_c4_g2	2689.57	147.611	-4.18812	0.000833946	0.0262295	down	--	--	Cellular Component: extracellular region (GO:0005576);; Molecular Function: carbohydrate binding (GO:0030246);;	--|1e-131|haw:110384574|hypothetical protein	[TV]	--	Lectin C-type domain	Hemolymph lipopolysaccharide-binding protein OS=Periplaneta americana OX=6978 PE=1 SV=1	macrophage mannose receptor 1-like [Spodoptera litura]
TRINITY_DN18436_c0_g1	1728.63	555.398	-1.63787	0.000421858	0.016086	down	--	--	Cellular Component: extracellular region (GO:0005576);; Biological Process: chitin metabolic process (GO:0006030);; Molecular Function: chitin binding (GO:0008061);;	--|2e-08|pmac:106718804|hypothetical protein	--	--	Chitin binding Peritrophin-A domain	Peritrophin-1 OS=Anopheles gambiae OX=7165 GN=Aper1 PE=2 SV=2	PREDICTED: peritrophin-1-like [Megachile rotundata]
TRINITY_DN22279_c1_g2	94.157	611.239	2.70502	4.34e-07	7.42e-05	up	--	--	--	--|2e-29|haw:110379316|hypothetical protein	--	--	--	--	small heat shock protein 27.2 [Spodoptera litura]
TRINITY_DN29582_c1_g2	2017.2	415.468	-2.28004	0.000224813	0.0102002	down	--	--	--	--|1e-138|haw:110374543|hypothetical protein	--	--	--	--	uncharacterized protein LOC111349142 [Spodoptera litura]
TRINITY_DN23021_c3_g4	36.8804	1.18302	-4.9909	0.000195541	0.00928444	down	--	--	--	K00069|6e-06|tnl:113504402|K00069 HPGD; 15-hydroxyprostaglandin dehydrogenase (NAD) [EC:1.1.1.141]	--	--	--	--	alcohol dehydrogenase, partial [Agrotis ipsilon]
TRINITY_DN23322_c6_g2	46.7937	695.849	3.89852	0.00062313	0.0213929	up	--	--	--	--	--	--	--	--	adhesive plaque matrix protein-like [Spodoptera litura]
TRINITY_DN28889_c0_g1	4.70027	31.5613	2.78923	0.000415412	0.0158811	up	[GEPR]	--	Cellular Component: integral component of membrane (GO:0016021);; Molecular Function: transmembrane transporter activity (GO:0022891);;	K06258|1e-156|haw:110376131|K06258 SV2; MFS transporter, VNT family, synaptic vesicle glycoprotein 2	[R]	General function prediction only	Sugar (and other) transporter;; Major Facilitator Superfamily	Putative transporter svop-1 OS=Caenorhabditis elegans OX=6239 GN=svop-1 PE=3 SV=5	synaptic vesicle glycoprotein 2B-like [Spodoptera litura]
TRINITY_DN18436_c0_g2	930.513	117.75	-2.98111	6.75e-06	0.000680074	down	--	--	--	--|9e-13|bmor:101739663|hypothetical protein	--	--	Chitin binding Peritrophin-A domain	--	chondroitin proteoglycan 2-like [Spodoptera litura]
TRINITY_DN31037_c6_g2	34390	1922.54	-4.16093	1.43e-11	9.4e-09	down	--	--	Biological Process: nematode larval development (GO:0002119);; Molecular Function: extracellular matrix structural constituent (GO:0005201);; Cellular Component: collagen trimer (GO:0005581);; Cellular Component: basement membrane (GO:0005604);; Biological Process: muscle organ development (GO:0007517);; Biological Process: embryo development ending in birth or egg hatching (GO:0009792);; Biologi…	K06237|0.0|haw:110380348|K06237 COL4A; collagen, type IV, alpha	[W]	Extracellular structures	Collagen triple helix repeat (20 copies)	Collagen alpha-1(IV) chain OS=Caenorhabditis elegans OX=6239 GN=emb-9 PE=1 SV=5	collagen alpha-1(IV) chain-like [Spodoptera litura]
TRINITY_DN22905_c0_g1	1202.97	196.479	-2.61317	6.83e-08	1.52e-05	down	--	--	--	--	--	--	--	--	cuticle protein 1 [Lonomia obliqua]
TRINITY_DN28246_c2_g1	633.081	53.7726	-3.55742	0.000124643	0.00660628	down	--	--	--	--|0.0|tnl:113491656|hypothetical protein	[S]	Function unknown	PDZ domain (Also known as DHR or GLGF)	--	uncharacterized protein LOC111359121 [Spodoptera litura]
TRINITY_DN24171_c0_g1	8488.33	412.407	-4.36327	1.52e-10	7.76e-08	down	--	--	Molecular Function: calcium channel activity (GO:0005262);; Cellular Component: cilium (GO:0005929);; Biological Process: mating behavior (GO:0007617);; Cellular Component: membrane (GO:0016020);; Cellular Component: integral component of membrane (GO:0016021);; Molecular Function: protein domain specific binding (GO:0019904);; Biological Process: response to hermaphrodite contact (GO:0034606);; …	--|3e-99|haw:110380155|hypothetical protein	[GO]	--	--	Location of vulva defective 1 OS=Caenorhabditis elegans OX=6239 GN=lov-1 PE=1 SV=4	uncharacterized protein LOC111358014 [Spodoptera litura]
TRINITY_DN29700_c3_g2	1283.36	121.154	-3.40592	0.000250172	0.0110299	down	--	--	Molecular Function: structural constituent of cuticle (GO:0042302);;	--|2e-46|haw:110384174|hypothetical protein	--	--	Insect cuticle protein	Flexible cuticle protein 12 OS=Hyalophora cecropia OX=7123 GN=CP12 PE=2 SV=1	endocuticle structural glycoprotein ABD-5-like [Helicoverpa armigera]
TRINITY_DN23156_c6_g2	14695.2	460.313	-4.9965	5.63e-21	1.52e-17	down	--	--	Molecular Function: structural constituent of cuticle (GO:0042302);;	--|3e-49|haw:110383613|hypothetical protein	--	--	Insect cuticle protein	Larval cuticle protein LCP-17 OS=Bombyx mori OX=7091 GN=LCP17 PE=2 SV=1	larval cuticle protein LCP-17-like [Spodoptera litura]
TRINITY_DN27240_c2_g3	3456.8	383.464	-3.1723	7e-06	0.000693781	down	--	--	--	--|1e-95|haw:110373739|hypothetical protein	--	--	Haemolymph juvenile hormone binding protein (JHBP)	--	uncharacterized protein LOC111348996 [Spodoptera litura]
TRINITY_DN27456_c7_g1	1701.7	49.0189	-5.11979	7.52e-05	0.00460582	down	--	--	--	--|4e-25|haw:110374320|hypothetical protein	--	--	--	--	skin secretory protein xP2-like [Helicoverpa armigera]
TRINITY_DN25654_c1_g3	47.897	0.596424	-6.36632	0.00011145	0.00614908	down	--	--	Molecular Function: structural constituent of cuticle (GO:0042302);;	--|2e-79|haw:110377475|hypothetical protein	--	--	--	Cuticle protein LPCP-23 OS=Tenebrio molitor OX=7067 GN=LPCP-23 PE=3 SV=2	cuticle protein 16.5-like [Spodoptera litura]
TRINITY_DN31927_c2_g4	49076.4	6770.54	-2.85768	4.36e-06	0.000476947	down	[G]	Carbohydrate transport and metabolism	Molecular Function: fructose-bisphosphate aldolase activity (GO:0004332);; Cellular Component: cytosol (GO:0005829);; Biological Process: glycolytic process (GO:0006096);; Biological Process: mitotic G2 DNA damage checkpoint (GO:0007095);; Biological Process: mesoderm development (GO:0007498);; Cellular Component: Z disc (GO:0030018);; Cellular Component: M band (GO:0031430);;	K01623|1e-76|haw:110380063|K01623 ALDO; fructose-bisphosphate aldolase, class I [EC:4.1.2.13]	[G]	Carbohydrate transport and metabolism	Fructose-bisphosphate aldolase class-I	Fructose-bisphosphate aldolase OS=Drosophila melanogaster OX=7227 GN=Ald PE=1 SV=5	fructose-bisphosphate aldolase isoform X2 [Spodoptera litura]
TRINITY_DN19702_c0_g1	1516.84	393.873	-1.94483	1.39e-05	0.00122634	down	--	--	--	K16830|1e-135|tnl:113493771|K16830 AURKAIP1; aurora kinase A-interacting protein	[C]	Energy production and conversion	Mitochondrial domain of unknown function (DUF1713)	--	uncharacterized protein LOC111362173 [Spodoptera litura]
TRINITY_DN32092_c6_g1	16.801	148.494	3.16271	1.28e-07	2.58e-05	up	--	--	Molecular Function: DNA binding (GO:0003677);; Molecular Function: NAD+ ADP-ribosyltransferase activity (GO:0003950);; Cellular Component: nucleus (GO:0005634);; Biological Process: protein ADP-ribosylation (GO:0006471);; Molecular Function: zinc ion binding (GO:0008270);; Molecular Function: NAD binding (GO:0051287);;	K10798|9e-16|haw:110384099|K10798 PARP; poly [ADP-ribose] polymerase [EC:2.4.2.30]	[KLO]	--	Poly(ADP-ribose) polymerase and DNA-Ligase Zn-finger region	Poly [ADP-ribose] polymerase OS=Sarcophaga peregrina OX=7386 PE=1 SV=1	poly [ADP-ribose] polymerase 1-like [Spodoptera litura]
TRINITY_DN21792_c0_g1	3211.34	354.565	-3.17903	0.00156174	0.0407247	down	[E]	Amino acid transport and metabolism	Biological Process: amino acid transmembrane transport (GO:0003333);; Cellular Component: lysosomal membrane (GO:0005765);; Cellular Component: vacuolar membrane (GO:0005774);; Cellular Component: plasma membrane (GO:0005886);; Molecular Function: amino acid transmembrane transporter activity (GO:0015171);; Cellular Component: integral component of membrane (GO:0016021);; Cellular Component: axon…	K14209|0.0|tnl:113506857|K14209 SLC36A; solute carrier family 36 (proton-coupled amino acid transporter)	[E]	Amino acid transport and metabolism	Transmembrane amino acid transporter protein	Proton-coupled amino acid transporter-like protein pathetic OS=Drosophila melanogaster OX=7227 GN=path PE=1 SV=1	proton-coupled amino acid transporter-like protein pathetic isoform X2 [Spodoptera litura]
TRINITY_DN25737_c3_g2	613.442	202.177	-1.59982	0.000481199	0.0176811	down	--	--	Molecular Function: structural constituent of ribosome (GO:0003735);; Cellular Component: mitochondrial small ribosomal subunit (GO:0005763);; Biological Process: translation (GO:0006412);; Biological Process: sensory perception of pain (GO:0019233);; Biological Process: mitochondrial translation (GO:0032543);;	K02946|3e-90|haw:110373604|K02946 RP-S10; small subunit ribosomal protein S10	[J]	Translation, ribosomal structure and biogenesis	Ribosomal protein S10p/S20e	28S ribosomal protein S10, mitochondrial OS=Drosophila melanogaster OX=7227 GN=mRpS10 PE=2 SV=2	28S ribosomal protein S10, mitochondrial [Spodoptera litura]
TRINITY_DN31084_c2_g2	3768.36	1508.93	-1.32026	0.00131289	0.036252	down	[C]	Energy production and conversion	Molecular Function: fumarate hydratase activity (GO:0004333);; Cellular Component: mitochondrion (GO:0005739);; Biological Process: tricarboxylic acid cycle (GO:0006099);; Biological Process: fumarate metabolic process (GO:0006106);; Biological Process: malate metabolic process (GO:0006108);; Cellular Component: tricarboxylic acid cycle enzyme complex (GO:0045239);;	K01679|0.0|haw:110369840|K01679 E4.2.1.2B; fumarate hydratase, class II [EC:4.2.1.2]	[C]	Energy production and conversion	Lyase;; Fumarase C C-terminus	Probable fumarate hydratase, mitochondrial OS=Caenorhabditis elegans OX=6239 GN=fum-1 PE=3 SV=1	fumarate hydratase, mitochondrial-like [Spodoptera litura]
TRINITY_DN22075_c0_g4	709.958	147.885	-2.26249	0.00197533	0.0471978	down	--	--	Cellular Component: extracellular region (GO:0005576);;	--|0.0|tnl:113499299|hypothetical protein	[T]	Signal transduction mechanisms	Immunoglobulin I-set domain;; Immunoglobulin domain;; Immunoglobulin domain;; Immunoglobulin V-set domain;; Immunoglobulin domain	Zwei Ig domain protein zig-8 OS=Caenorhabditis elegans OX=6239 GN=zig-8 PE=2 SV=1	lachesin-like [Spodoptera litura]
TRINITY_DN28140_c0_g2	74.6197	16.1105	-2.22193	7.94e-05	0.00481587	down	--	--	--	K22679|4e-12|zne:110826644|K22679 GDF11; growth differentiation factor 11	--	--	--	--	hypothetical protein B5V51_12621 [Heliothis virescens]
TRINITY_DN28417_c4_g2	4157.76	578.002	-2.84677	4.91e-07	8.13e-05	down	[GEPR]	--	Cellular Component: plasma membrane (GO:0005886);; Molecular Function: trehalose transmembrane transporter activity (GO:0015574);; Biological Process: trehalose transport (GO:0015771);; Cellular Component: integral component of membrane (GO:0016021);;	K08145|0.0|haw:110381375|K08145 SLC2A8; MFS transporter, SP family, solute carrier family 2 (facilitated glucose transporter), member 8	[R]	General function prediction only	Sugar (and other) transporter;; Major Facilitator Superfamily	Facilitated trehalose transporter Tret1 OS=Bombyx mori OX=7091 GN=Tret1 PE=1 SV=1	facilitated trehalose transporter Tret1-like [Spodoptera litura]
TRINITY_DN22700_c0_g1	25.4525	127.145	2.30777	5.12e-05	0.00336087	up	--	--	--	--|0.0|tnl:113503334|hypothetical protein	--	--	--	--	uncharacterized protein LOC111355327 [Spodoptera litura]
TRINITY_DN26383_c1_g1	744.866	1738.76	1.22278	0.00147976	0.0391799	up	--	--	Molecular Function: DNA replication origin binding (GO:0003688);; Molecular Function: ATP binding (GO:0005524);; Cellular Component: nuclear origin of replication recognition complex (GO:0005664);; Biological Process: DNA replication (GO:0006260);; Biological Process: DNA-dependent DNA replication (GO:0006261);; Biological Process: DNA replication initiation (GO:0006270);; Biological Process: mit…	K02607|5e-91|haw:110377416|K02607 ORC5; origin recognition complex subunit 5	[L]	Replication, recombination and repair	AAA ATPase domain;; AAA domain;; ATPase family associated with various cellular activities (AAA)	Origin recognition complex subunit 5 OS=Drosophila melanogaster OX=7227 GN=Orc5 PE=1 SV=1	origin recognition complex subunit 5 [Spodoptera litura]
TRINITY_DN25711_c0_g2	3976.24	870.368	-2.19152	0.000461239	0.0171463	down	--	--	--	K20526|4e-34|tnl:113494779|K20526 TAGLN; transgelin	[Z]	Cytoskeleton	Calponin homology (CH) domain	Myophilin OS=Echinococcus granulosus OX=6210 PE=2 SV=1	myophilin-like [Spodoptera litura]
TRINITY_DN26252_c0_g1	1292.51	362.515	-1.83349	2.74e-06	0.000330243	down	[J]	Translation, ribosomal structure and biogenesis	--	K02863|0.0|tnl:113496853|K02863 RP-L1; large subunit ribosomal protein L1	[J]	Translation, ribosomal structure and biogenesis	Ribosomal protein L1p/L10e family	--	uncharacterized protein LOC111355914 [Spodoptera litura]
TRINITY_DN18260_c0_g1	984.757	238.106	-2.04748	0.000259845	0.011305	down	--	--	Cellular Component: integral component of membrane (GO:0016021);;	K13348|1e-125|haw:110378082|K13348 MPV17; protein Mpv17	[R]	General function prediction only	Mpv17 / PMP22 family	PXMP2/4 family protein 2 OS=Dictyostelium discoideum OX=44689 GN=DDB_G0278529 PE=3 SV=1	hypothetical protein B5V51_110 [Heliothis virescens]
TRINITY_DN26917_c1_g1	78.5267	678.736	3.10645	0.000485276	0.0177246	up	[G]	Carbohydrate transport and metabolism	Biological Process: carbohydrate metabolic process (GO:0005975);; Molecular Function: thioglucosidase activity (GO:0019137);; Molecular Function: metal ion binding (GO:0046872);;	--|1e-175|haw:110381159|hypothetical protein	[G]	Carbohydrate transport and metabolism	Glycosyl hydrolase family 1	Myrosinase 1 OS=Brevicoryne brassicae OX=69196 PE=1 SV=1	lactase-phlorizin hydrolase-like [Spodoptera litura]
TRINITY_DN19971_c0_g2	218.261	16.3006	-3.75016	7.78e-07	0.000117624	down	[IQR]	--	Biological Process: juvenile hormone biosynthetic process (GO:0006718);; Molecular Function: farnesol dehydrogenase activity (GO:0047886);;	K00079|1e-164|haw:110376991|K00079 CBR1; carbonyl reductase 1 [EC:1.1.1.184 1.1.1.189 1.1.1.197]	[Q]	Secondary metabolites biosynthesis, transport and catabolism	short chain dehydrogenase;; Enoyl-(Acyl carrier protein) reductase;; KR domain	Farnesol dehydrogenase OS=Aedes aegypti OX=7159 GN=SDR-1 PE=1 SV=2	carbonyl reductase [NADPH] 1-like [Spodoptera litura]
TRINITY_DN24831_c2_g2	1640.58	473.422	-1.79274	0.000219022	0.0100325	down	--	--	Molecular Function: single-stranded DNA binding (GO:0003697);; Molecular Function: transcription coactivator activity (GO:0003713);; Cellular Component: nucleus (GO:0005634);; Cellular Component: transcription factor complex (GO:0005667);; Biological Process: transcription, DNA-templated (GO:0006351);; Biological Process: negative regulation of transcription, DNA-templated (GO:0045892);; Biologic…	--|6e-62|haw:110384364|hypothetical protein	[K]	Transcription	Transcriptional Coactivator p15 (PC4)	RNA polymerase II transcriptional coactivator OS=Drosophila melanogaster OX=7227 GN=Ssb-c31a PE=2 SV=1	hypothetical protein B5V51_3100 [Heliothis virescens]
TRINITY_DN30334_c0_g1	11.4644	76.6682	2.73582	7.95e-06	0.000782668	up	--	--	--	--|0.0|tnl:113501659|hypothetical protein	[Q]	Secondary metabolites biosynthesis, transport and catabolism	Organic Anion Transporter Polypeptide (OATP) family	--	solute carrier organic anion transporter family member 1C1-like [Spodoptera litura]
TRINITY_DN20561_c4_g2	112.529	2.62764	-5.43828	1.12e-09	4.38e-07	down	[Q]	Secondary metabolites biosynthesis, transport and catabolism	Molecular Function: monooxygenase activity (GO:0004497);; Molecular Function: iron ion binding (GO:0005506);; Cellular Component: endoplasmic reticulum membrane (GO:0005789);; Molecular Function: oxidoreductase activity, acting on paired donors, with incorporation or reduction of molecular oxygen (GO:0016705);; Molecular Function: heme binding (GO:0020037);; Cellular Component: organelle membrane…	K07427|2e-37|haw:110380839|K07427 CYP4V2; docosahexaenoic acid omega-hydroxylase [EC:1.14.14.79]	[QI]	--	Cytochrome P450	Probable cytochrome P450 313a1 OS=Drosophila melanogaster OX=7227 GN=Cyp313a1 PE=3 SV=2	cytochrome P450 4C1-like isoform X2 [Spodoptera litura]
TRINITY_DN22070_c1_g1	358.371	106.519	-1.74896	0.00173252	0.0432444	down	--	--	--	--|2e-13|haw:110371756|hypothetical protein	--	--	--	--	retinol dehydrogenase 11-like [Spodoptera litura]
TRINITY_DN31685_c2_g1	100.5	798.023	2.98818	0.000220265	0.01004	up	[IQ]	--	Molecular Function: ATP binding (GO:0005524);; Biological Process: phenylpropanoid metabolic process (GO:0009698);; Molecular Function: 4-coumarate-CoA ligase activity (GO:0016207);;	--|0.0|haw:110369823|hypothetical protein	[I]	Lipid transport and metabolism	AMP-binding enzyme;; AMP-binding enzyme C-terminal domain	Probable 4-coumarate--CoA ligase 1 OS=Dictyostelium discoideum OX=44689 GN=4cl1 PE=3 SV=1	4-coumarate--CoA ligase 1-like [Spodoptera litura]
TRINITY_DN24939_c0_g8	420.962	77.1769	-2.449	0.00069604	0.0228675	down	--	--	--	--|7e-33|haw:110371634|hypothetical protein	--	--	--	--	uncharacterized protein LOC111348582 isoform X1 [Spodoptera litura]
TRINITY_DN17822_c0_g1	2577.23	221.727	-3.53879	0.00129403	0.0358321	down	--	--	--	--|6e-12|bmor:101742730|hypothetical protein	--	--	--	--	uncharacterized protein LOC101742730 [Bombyx mori]
TRINITY_DN24622_c1_g2	5.94464	104.789	4.15177	8.33e-11	4.49e-08	up	--	--	Cellular Component: extracellular region (GO:0005576);; Biological Process: killing of cells of other organism (GO:0031640);; Biological Process: defense response to bacterium (GO:0042742);; Biological Process: innate immune response (GO:0045087);; Biological Process: defense response to fungus (GO:0050832);;	--|2e-17|haw:110376389|hypothetical protein	--	--	--	Holotricin-3 OS=Holotrichia diomphalia OX=33394 PE=1 SV=2	metal tolerance protein 1-like [Spodoptera litura]
TRINITY_DN19314_c0_g1	1140.9	324.834	-1.81179	0.00033558	0.0136574	down	[O]	Posttranslational modification, protein turnover, chaperones	Molecular Function: copper ion binding (GO:0005507);; Cellular Component: mitochondrial inner membrane (GO:0005743);; Cellular Component: integral component of membrane (GO:0016021);;	K02258|1e-161|haw:110375961|K02258 COX11; cytochrome c oxidase assembly protein subunit 11	[O]	Posttranslational modification, protein turnover, chaperones	Cytochrome c oxidase assembly protein CtaG/Cox11	Cytochrome c oxidase assembly protein ctaG OS=Reclinomonas americana OX=48483 GN=CTAG PE=3 SV=1	cytochrome c oxidase assembly protein COX11, mitochondrial [Spodoptera litura]
TRINITY_DN23671_c0_g1	321.779	1101.28	1.77634	5.94e-05	0.00378624	up	[QR]	--	Molecular Function: methyltransferase activity (GO:0008168);;	--|0.0|haw:110379688|hypothetical protein	[E]	Amino acid transport and metabolism	Methyltransferase domain;; Methyltransferase domain;; Methyltransferase domain;; Methyltransferase domain;; Methyltransferase small domain;; ubiE/COQ5 methyltransferase family	Methyltransferase-like protein 13 OS=Drosophila melanogaster OX=7227 GN=CG2614 PE=2 SV=1	methyltransferase-like protein 13 [Spodoptera litura]
TRINITY_DN23827_c0_g1	22.4361	267.983	3.57864	0.000455557	0.016999	up	--	--	Molecular Function: serine-type endopeptidase activity (GO:0004252);; Cellular Component: extracellular space (GO:0005615);; Biological Process: collagen catabolic process (GO:0030574);;	--|1e-110|haw:110384563|hypothetical protein	[E]	Amino acid transport and metabolism	Trypsin	Chymotrypsin BI OS=Litopenaeus vannamei OX=6689 PE=1 SV=1	chymotrypsin-like serine protease precursor, partial [Spodoptera frugiperda]
TRINITY_DN16453_c0_g1	1074.67	274.162	-1.97024	6.3e-07	9.82e-05	down	[J]	Translation, ribosomal structure and biogenesis	Molecular Function: RNA binding (GO:0003723);; Molecular Function: structural constituent of ribosome (GO:0003735);; Cellular Component: mitochondrial large ribosomal subunit (GO:0005762);; Biological Process: translation (GO:0006412);;	K02888|1e-111|haw:110374887|K02888 RP-L21; large subunit ribosomal protein L21	[J]	Translation, ribosomal structure and biogenesis	Ribosomal prokaryotic L21 protein	Probable 39S ribosomal protein L21, mitochondrial OS=Dictyostelium discoideum OX=44689 GN=mrpl21 PE=3 SV=1	39S ribosomal protein L21, mitochondrial isoform X1 [Spodoptera litura]
TRINITY_DN26217_c0_g1	4.8758	95.4718	4.30321	1.48e-07	2.97e-05	up	--	--	--	--|2e-11|tnl:113500852|hypothetical protein	--	--	--	--	uncharacterized protein LOC111355862 isoform X2 [Spodoptera litura]
TRINITY_DN21288_c0_g2	36.0978	7.54196	-2.24351	0.00198594	0.0473746	down	--	--	--	K02918|2e-09|pmac:106710748|K02918 RP-L35e; large subunit ribosomal protein L35e	[J]	Translation, ribosomal structure and biogenesis	--	--	PREDICTED: 60S ribosomal protein L35 [Papilio machaon]
TRINITY_DN19464_c2_g3	0.950988	21.5677	4.35029	0.00014282	0.0073209	up	--	--	--	--	--	--	--	--	uncharacterized protein LOC111361750 [Spodoptera litura]
TRINITY_DN19952_c0_g1	39102	9143.7	-2.09641	0.000147476	0.00746909	down	--	--	Molecular Function: structural constituent of cuticle (GO:0042302);;	--|7e-53|haw:110384085|hypothetical protein	--	--	--	Larval cuticle protein 1 OS=Helicoverpa armigera OX=29058 GN=LCP1 PE=3 SV=1	larval cuticle protein 1-like [Helicoverpa armigera]
TRINITY_DN16172_c0_g1	2.2424	56.705	4.58192	3.52e-05	0.00254638	up	--	--	--	--|1e-43|tnl:113500854|hypothetical protein	--	--	--	--	uncharacterized protein LOC111355738 [Spodoptera litura]
TRINITY_DN19151_c0_g2	1940.31	570.004	-1.76682	0.000141501	0.00727845	down	[R]	General function prediction only	--	K07152|1e-180|haw:110384401|K07152 SCO1_2; protein SCO1/2	[C]	Energy production and conversion	SCO1/SenC;; AhpC/TSA family	--	protein SCO1 homolog, mitochondrial [Spodoptera litura]
TRINITY_DN18948_c1_g2	76.6464	319.186	2.06429	9.51e-05	0.00550317	up	--	--	--	--|1e-54|haw:110381014|hypothetical protein	--	--	--	--	uncharacterized protein LOC111364789 [Spodoptera litura]
TRINITY_DN30207_c3_g2	7.23092	603.969	6.41364	0.000138276	0.00713737	up	--	--	Molecular Function: monooxygenase activity (GO:0004497);; Molecular Function: iron ion binding (GO:0005506);; Cellular Component: endoplasmic reticulum membrane (GO:0005789);; Molecular Function: oxidoreductase activity (GO:0016491);; Molecular Function: oxidoreductase activity, acting on paired donors, with incorporation or reduction of molecular oxygen (GO:0016705);; Molecular Function: heme bi…	K14999|1e-21|haw:110378486|K14999 CYP6; cytochrome P450 family 6 [EC:1.14.-.-]	[Q]	Secondary metabolites biosynthesis, transport and catabolism	Cytochrome P450	Probable cytochrome P450 9f2 OS=Drosophila melanogaster OX=7227 GN=Cyp9f2 PE=2 SV=1	cytochrome P450 9e2-like [Spodoptera litura]
TRINITY_DN19842_c3_g1	91.1872	525.251	2.53263	4.55e-06	0.000491604	up	--	--	--	--	--	--	--	--	hypothetical protein B5V51_6420 [Heliothis virescens]
TRINITY_DN30506_c0_g1	52.034	191.063	1.87047	0.00033618	0.013663	up	[S]	Function unknown	Biological Process: instar larval development (GO:0002168);; Cellular Component: intracellular (GO:0005622);; Cellular Component: muscle tendon junction (GO:0005927);; Molecular Function: zinc ion binding (GO:0008270);; Biological Process: muscle attachment (GO:0016203);; Biological Process: cell differentiation (GO:0030154);; Molecular Function: protein binding, bridging (GO:0030674);; Biologica…	K12035|0.0|haw:110369999|K12035 TRIM71; tripartite motif-containing protein 71 [EC:2.3.2.27]	[O]	Posttranslational modification, protein turnover, chaperones	NHL repeat;; 6-bladed beta-propeller;; SMP-30/Gluconolaconase/LRE-like region;; B-box zinc finger	Protein wech OS=Drosophila melanogaster OX=7227 GN=wech PE=1 SV=2	protein wech isoform X1 [Spodoptera litura]
TRINITY_DN18297_c0_g1	1155.55	19.4736	-5.89746	1.84e-09	6.89e-07	down	--	--	Molecular Function: structural constituent of cuticle (GO:0042302);;	--|2e-71|tnl:113499645|hypothetical protein	--	--	Insect cuticle protein	Cuticle protein 19.8 OS=Locusta migratoria OX=7004 PE=1 SV=1	larval cuticle protein A3A-like [Spodoptera litura]
TRINITY_DN30863_c1_g3	72.1361	1.70623	-5.40722	3.74e-11	2.17e-08	down	--	--	--	--|1e-106|bmor:105842184|hypothetical protein	--	--	--	--	uncharacterized protein LOC105842184 [Bombyx mori]
TRINITY_DN18754_c0_g2	895.459	22.9315	-5.29194	1.41e-06	0.000193164	down	[Q]	Secondary metabolites biosynthesis, transport and catabolism	Molecular Function: ATP binding (GO:0005524);; Biological Process: fatty acid metabolic process (GO:0006631);; Molecular Function: acid-thiol ligase activity (GO:0016878);;	--|0.0|haw:110380914|hypothetical protein	[Q]	Secondary metabolites biosynthesis, transport and catabolism	AMP-binding enzyme;; Phosphopantetheine attachment site	Beta-alanine-activating enzyme OS=Drosophila melanogaster OX=7227 GN=U26 PE=2 SV=3	uncharacterized protein LOC110380914 [Helicoverpa armigera]
TRINITY_DN24376_c1_g1	7449.37	1394.79	-2.41705	0.0016018	0.041448	down	[R]	General function prediction only	Biological Process: steroid metabolic process (GO:0008202);; Molecular Function: oxidoreductase activity (GO:0016491);;	K00011|2e-63|haw:110381990|K00011 AKR1B; aldehyde reductase [EC:1.1.1.21]	[R]	General function prediction only	Aldo/keto reductase family	Aldo-keto reductase AKR2E4 OS=Bombyx mori OX=7091 GN=akr2e PE=1 SV=1	aldo-keto reductase AKR2E4-like [Spodoptera litura]
TRINITY_DN21370_c2_g3	743.165	281.377	-1.40119	0.000136728	0.0070821	down	[O]	Posttranslational modification, protein turnover, chaperones	Molecular Function: peroxidase activity (GO:0004601);; Cellular Component: cytoplasm (GO:0005737);; Biological Process: cell redox homeostasis (GO:0045454);; Molecular Function: peroxiredoxin activity (GO:0051920);;	--|1e-145|haw:110373881|hypothetical protein	[O]	Posttranslational modification, protein turnover, chaperones	AhpC/TSA family;; C-terminal domain of 1-Cys peroxiredoxin;; Redoxin	1-Cys peroxiredoxin OS=Dirofilaria immitis OX=6287 PE=1 SV=2	peroxiredoxin-6 [Spodoptera litura]
TRINITY_DN24999_c0_g1	39.3267	527.128	3.73984	1.03e-05	0.000969459	up	--	--	Cellular Component: mitochondrion (GO:0005739);; Cellular Component: lipid droplet (GO:0005811);; Biological Process: lipid metabolic process (GO:0006629);; Cellular Component: integral component of membrane (GO:0016021);; Molecular Function: oxidoreductase activity (GO:0016491);; Molecular Function: heme binding (GO:0020037);; Molecular Function: metal ion binding (GO:0046872);;	--|1e-174|haw:110384000|hypothetical protein	[I]	Lipid transport and metabolism	Cytochrome b5-like Heme/Steroid binding domain;; Fatty acid desaturase	Cytochrome b5-related protein OS=Drosophila melanogaster OX=7227 GN=Cyt-b5-r PE=2 SV=2	desaturase [Spodoptera exigua]
TRINITY_DN19408_c0_g5	39.4349	108.329	1.45583	0.00164551	0.0420649	up	--	--	--	--|8e-32|haw:110377571|hypothetical protein	--	--	--	--	longitudinals lacking protein, isoforms H/M/V-like isoform X7 [Spodoptera litura]
TRINITY_DN16735_c0_g1	1686.49	268.374	-2.65123	0.00164407	0.0420644	down	--	--	Cellular Component: extracellular region (GO:0005576);; Biological Process: metamorphosis (GO:0007552);; Biological Process: response to virus (GO:0009615);; Biological Process: post-mating behavior (GO:0045297);;	--|2e-75|tnl:113495262|hypothetical protein	--	--	Insect pheromone-binding family, A10/OS-D	Ejaculatory bulb-specific protein 3 OS=Drosophila melanogaster OX=7227 GN=EbpIII PE=2 SV=2	putative chemosensory protein CSP3 [Spodoptera litura]
TRINITY_DN26980_c1_g1	571.681	17.7152	-5.01013	5.52e-07	8.85e-05	down	--	--	--	--|1e-132|haw:110381067|hypothetical protein	[I]	Lipid transport and metabolism	CRAL/TRIO domain;; Divergent CRAL/TRIO domain	--	alpha-tocopherol transfer protein-like [Spodoptera litura]
TRINITY_DN18076_c0_g1	782.431	293.251	-1.41518	0.000219841	0.0100361	down	[J]	Translation, ribosomal structure and biogenesis	--	K02963|3e-80|tnl:113494957|K02963 RP-S18; small subunit ribosomal protein S18	[J]	Translation, ribosomal structure and biogenesis	Ribosomal protein S18	--	28S ribosomal protein S18c, mitochondrial isoform X2 [Spodoptera litura]
TRINITY_DN21990_c0_g1	2.84284	73.4962	4.66699	1.38e-05	0.00122556	up	[GC]	--	Biological Process: metabolic process (GO:0008152);; Molecular Function: glucuronosyltransferase activity (GO:0015020);; Cellular Component: integral component of membrane (GO:0016021);; Cellular Component: intracellular membrane-bounded organelle (GO:0043231);;	K00699|0.0|pxy:105393312|K00699 UGT; glucuronosyltransferase [EC:2.4.1.17]	[GC]	--	UDP-glucoronosyl and UDP-glucosyl transferase;; Glycosyltransferase family 28 C-terminal domain	Putative UDP-glucuronosyltransferase ugt-50 OS=Caenorhabditis elegans OX=6239 GN=ugt-50 PE=1 SV=2	UDP-glucuronosyltransferase 2B31-like isoform X2 [Spodoptera litura]
TRINITY_DN17664_c0_g1	240.678	21.6566	-3.47954	0.00167341	0.0425015	down	--	--	--	--|5e-80|haw:110382766|hypothetical protein	--	--	Somatomedin B domain;; Thrombospondin type 1 domain	--	somatomedin-B and thrombospondin type-1 domain-containing protein [Helicoverpa armigera]
TRINITY_DN24803_c3_g4	852.649	24.5614	-5.11833	0.000250933	0.011047	down	--	--	--	--	--	--	--	--	hypothetical protein KGM_205972 [Danaus plexippus plexippus]
TRINITY_DN22936_c6_g1	2014.63	13.8889	-7.18535	7.64e-07	0.000116641	down	--	--	Molecular Function: structural constituent of cuticle (GO:0042302);;	--|1e-43|haw:110376227|hypothetical protein	[WV]	--	--	Cuticle protein 3 OS=Lonomia obliqua OX=304329 PE=1 SV=2	uncharacterized protein LOC111349432 [Spodoptera litura]
TRINITY_DN27103_c2_g1	7345.19	2101.56	-1.80543	2.48e-05	0.00192372	down	--	--	--	--|0.0|haw:110374411|hypothetical protein	[TU]	--	EF hand;; EF-hand domain pair;; EF-hand domain	--	calumenin-B isoform X2 [Spodoptera litura]
TRINITY_DN30510_c0_g1	980.02	252.223	-1.95721	0.000545901	0.0193007	down	[F]	Nucleotide transport and metabolism	Molecular Function: uridine phosphorylase activity (GO:0004850);; Cellular Component: cytoplasm (GO:0005737);; Biological Process: uracil catabolic process (GO:0006212);; Biological Process: uridine catabolic process (GO:0006218);; Biological Process: pyrimidine nucleotide biosynthetic process (GO:0006221);; Molecular Function: thymidine phosphorylase activity (GO:0009032);; Biological Process: n…	K00757|0.0|haw:110382294|K00757 udp; uridine phosphorylase [EC:2.4.2.3]	[F]	Nucleotide transport and metabolism	Phosphorylase superfamily	Uridine and thymidine phosphorylase OS=Caenorhabditis elegans OX=6239 GN=upp-1 PE=1 SV=2	uridine phosphorylase 1-like isoform X1 [Spodoptera litura]
TRINITY_DN19172_c0_g1	1619.49	580.001	-1.48093	0.00121277	0.0342536	down	[J]	Translation, ribosomal structure and biogenesis	Molecular Function: structural constituent of ribosome (GO:0003735);; Cellular Component: ribosome (GO:0005840);; Biological Process: translation (GO:0006412);; Cellular Component: plastid (GO:0009536);; Molecular Function: rRNA binding (GO:0019843);; Cellular Component: organellar chromatophore (GO:0070111);;	K02887|3e-99|haw:110379004|K02887 RP-L20; large subunit ribosomal protein L20	[J]	Translation, ribosomal structure and biogenesis	Ribosomal protein L20;; PET assembly of cytochrome c oxidase, mitochondrial	50S ribosomal protein L20, organellar chromatophore OS=Paulinella chromatophora OX=39717 GN=rpl20 PE=3 SV=1	ribosomal protein L20 [Spodoptera frugiperda]
TRINITY_DN22722_c2_g4	110.504	709.029	2.68226	0.000337973	0.0137033	up	--	--	--	--|5e-13|haw:110371316|hypothetical protein	--	--	--	--	actin cytoskeleton-regulatory complex protein PAN1-like [Spodoptera litura]
TRINITY_DN24161_c1_g2	199.282	25.7925	-2.95478	2.57e-07	4.8e-05	down	[C]	Energy production and conversion	Cellular Component: mitochondrial proton-transporting ATP synthase complex, catalytic core F(1) (GO:0000275);; Cellular Component: mitochondrion (GO:0005739);; Cellular Component: lipid droplet (GO:0005811);; Biological Process: phagocytosis (GO:0006909);; Biological Process: ATP synthesis coupled proton transport (GO:0015986);; Biological Process: proton transmembrane transport (GO:0015992);; Mo…	K02136|1e-152|haw:110379373|K02136 ATPeF1G; F-type H+-transporting ATPase subunit gamma	[C]	Energy production and conversion	ATP synthase	ATP synthase subunit gamma, mitochondrial OS=Drosophila melanogaster OX=7227 GN=ATPsyngamma PE=2 SV=2	ATP synthase subunit gamma, mitochondrial-like isoform X1 [Spodoptera litura]
TRINITY_DN25584_c2_g1	2653.76	226.454	-3.55029	0.000123593	0.00657415	down	--	--	Biological Process: circadian rhythm (GO:0007623);;	--|2e-83|haw:110377500|hypothetical protein	--	--	Haemolymph juvenile hormone binding protein (JHBP)	Circadian clock-controlled protein OS=Drosophila yakuba OX=7245 GN=anon-3B1.2 PE=3 SV=1	circadian clock-controlled protein-like [Spodoptera litura]
TRINITY_DN28174_c4_g1	83.6634	436.824	2.38988	2.5e-05	0.00193218	up	--	--	Molecular Function: monooxygenase activity (GO:0004497);; Molecular Function: iron ion binding (GO:0005506);; Cellular Component: endoplasmic reticulum membrane (GO:0005789);; Molecular Function: oxidoreductase activity, acting on paired donors, with incorporation or reduction of molecular oxygen (GO:0016705);; Molecular Function: heme binding (GO:0020037);; Cellular Component: organelle membrane…	K15003|3e-23|aag:5579928|K15003 CYP9; cytochrome P450 family 9 [EC:1.14.-.-]	[Q]	Secondary metabolites biosynthesis, transport and catabolism	Cytochrome P450	Cytochrome P450 9e2 OS=Blattella germanica OX=6973 GN=CYP9E2 PE=2 SV=1	cytochrome P450 9A59 [Spodoptera frugiperda]
TRINITY_DN16129_c0_g2	1257.67	413.525	-1.60436	0.000217704	0.0100002	down	[J]	Translation, ribosomal structure and biogenesis	Molecular Function: translation elongation factor activity (GO:0003746);; Cellular Component: mitochondrion (GO:0005739);;	K02357|0.0|haw:110373091|K02357 tsf; elongation factor Ts	[J]	Translation, ribosomal structure and biogenesis	Elongation factor TS	Elongation factor Ts, mitochondrial OS=Aedes aegypti OX=7159 GN=AAEL000331 PE=3 SV=1	elongation factor Ts, mitochondrial isoform X1 [Spodoptera litura]
TRINITY_DN29513_c2_g1	2.77202	27.8938	3.29075	0.00171649	0.0431224	up	--	--	--	--|1e-36|haw:110376640|hypothetical protein	--	--	Lipase	--	pancreatic triacylglycerol lipase-like [Spodoptera litura]
TRINITY_DN18096_c0_g1	8.0383	123.99	3.97323	2.04e-05	0.00165707	up	--	--	Molecular Function: double-stranded DNA binding (GO:0003690);; Cellular Component: extracellular region (GO:0005576);; Biological Process: neuropeptide signaling pathway (GO:0007218);; Biological Process: killing of cells of other organism (GO:0031640);; Biological Process: defense response to bacterium (GO:0042742);; Biological Process: defense response to Gram-negative bacterium (GO:0050829);; …	--|3e-07|aalb:115259308|hypothetical protein	--	--	--	Neuropeptide-like protein 31 OS=Caenorhabditis elegans OX=6239 GN=nlp-31 PE=2 SV=1	PREDICTED: putative glycine-rich cell wall structural protein 1 [Amyelois transitella]
TRINITY_DN25771_c1_g2	13.0193	184.901	3.83203	0.000133233	0.00693746	up	--	--	Cellular Component: extracellular region (GO:0005576);; Biological Process: protein-chromophore linkage (GO:0018298);; Molecular Function: pigment binding (GO:0031409);;	K03098|5e-44|haw:110376423|K03098 APOD; apolipoprotein D and lipocalin family protein	--	--	--	Insecticyanin-A OS=Manduca sexta OX=7130 GN=INSA PE=1 SV=1	insecticyanin-A-like [Spodoptera litura]
TRINITY_DN16720_c0_g1	20.44	2.80181	-2.85767	0.0011891	0.0338431	down	--	--	Cellular Component: cytoplasm (GO:0005737);; Cellular Component: cilium (GO:0005929);; Biological Process: sensory perception of sound (GO:0007605);; Molecular Function: zinc ion binding (GO:0008270);; Biological Process: proprioception (GO:0019230);; Biological Process: flagellated sperm motility (GO:0030317);; Biological Process: axoneme assembly (GO:0035082);; Biological Process: outer dynein …	--|0.0|haw:110382061|hypothetical protein	--	--	MYND finger	Zinc finger MYND domain-containing protein 10 homolog OS=Drosophila melanogaster OX=7227 GN=Zmynd10 PE=1 SV=1	zinc finger MYND domain-containing protein 10 [Spodoptera litura]
TRINITY_DN24153_c0_g1	3.63142	125.178	5.15923	5.17e-08	1.25e-05	up	--	--	Molecular Function: phospholipase A2 activity (GO:0004623);; Cellular Component: extracellular region (GO:0005576);; Molecular Function: phosphatidylcholine 1-acylhydrolase activity (GO:0008970);; Biological Process: lipid catabolic process (GO:0016042);; Molecular Function: phosphatidylserine 1-acylhydrolase activity (GO:0052739);; Molecular Function: 1-acyl-2-lysophosphatidylserine acylhydrolas…	K19404|1e-127|tnl:113495377|K19404 LIPH_I; phosphatidic acid-selective phospholipase A1 [EC:3.1.1.-]	--	--	Lipase	Phospholipase A1 2 OS=Dolichovespula maculata OX=7441 PE=1 SV=1	lipase member H-like [Spodoptera litura]
TRINITY_DN28951_c0_g3	118.814	0.324986	-8.60018	9.26e-07	0.000136569	down	--	--	--	--|1e-34|haw:110376229|hypothetical protein	--	--	--	--	uncharacterized protein LOC111349432 [Spodoptera litura]
TRINITY_DN21306_c0_g2	788.535	304.505	-1.37227	0.00213375	0.0499638	down	--	--	Cellular Component: mitochondrial inner membrane (GO:0005743);; Cellular Component: mitochondrial intermembrane space (GO:0005758);; Molecular Function: NADH dehydrogenase (ubiquinone) activity (GO:0008137);; Cellular Component: respiratory chain (GO:0070469);;	K03963|2e-42|tnl:113495003|K03963 NDUFB7; NADH dehydrogenase (ubiquinone) 1 beta subcomplex subunit 7	[C]	Energy production and conversion	NADH-ubiquinone oxidoreductase B18 subunit (NDUFB7)	NADH dehydrogenase [ubiquinone] 1 beta subcomplex subunit 7 OS=Caenorhabditis elegans OX=6239 GN=D2030.4 PE=3 SV=1	NADH dehydrogenase [ubiquinone] 1 beta subcomplex subunit 7 [Spodoptera litura]
TRINITY_DN23762_c1_g1	269.06	99.1655	-1.44001	0.00027701	0.0118602	down	--	--	Cellular Component: cytoplasm (GO:0005737);; Cellular Component: membrane (GO:0016020);;	--|0.0|haw:110378659|hypothetical protein	[Z]	Cytoskeleton	Myosin-like coiled-coil protein	Uncharacterized protein PFB0145c OS=Plasmodium falciparum (isolate 3D7) OX=36329 GN=PFB0145c PE=1 SV=1	gamma-taxilin [Spodoptera litura]
TRINITY_DN20168_c0_g1	7001.49	317.671	-4.46251	1.62e-09	6.16e-07	down	--	--	Molecular Function: structural constituent of cuticle (GO:0042302);;	--|1e-10|pxy:105393786|hypothetical protein	--	--	--	Flexible cuticle protein 12 OS=Hyalophora cecropia OX=7123 GN=CP12 PE=2 SV=1	cuticle protein CP14.6-like [Spodoptera litura]
TRINITY_DN15096_c0_g1	0.293391	22.3402	5.80559	5.33e-05	0.00344987	up	--	--	Molecular Function: lipid transporter activity (GO:0005319);; Cellular Component: extracellular region (GO:0005576);; Molecular Function: lipid binding (GO:0008289);; Biological Process: Wnt signaling pathway (GO:0016055);;	--|3e-45|haw:110381502|hypothetical protein	--	--	--	Apolipophorins OS=Manduca sexta OX=7130 PE=2 SV=1	apolipophorins isoform X1 [Spodoptera litura]
TRINITY_DN19363_c1_g1	50.6267	8.15804	-2.63652	0.000429614	0.0162562	down	--	--	--	K11547|2e-90|haw:110376769|K11547 NDC80; kinetochore protein NDC80	--	--	--	--	uncharacterized protein LOC111348712 [Spodoptera litura]
TRINITY_DN30505_c0_g1	5804.62	1437.54	-2.01345	0.000412295	0.0158027	down	--	--	--	K15014|0.0|haw:110373559|K15014 SLC29A1_2_3; solute carrier family 29 (equilibrative nucleoside transporter), member 1/2/3	[F]	Nucleotide transport and metabolism	Nucleoside transporter	--	equilibrative nucleoside transporter 1 [Spodoptera litura]
TRINITY_DN25178_c1_g1	4123.81	1041.16	-1.98555	9.43e-06	0.000901588	down	--	--	Molecular Function: holocytochrome-c synthase activity (GO:0004408);; Cellular Component: mitochondrion (GO:0005739);; Cellular Component: mitochondrial inner membrane (GO:0005743);; Biological Process: cytochrome c-heme linkage (GO:0018063);; Molecular Function: metal ion binding (GO:0046872);;	K01764|0.0|haw:110384079|K01764 HCCS; cytochrome c heme-lyase [EC:4.4.1.17]	[CO]	--	Cytochrome c/c1 heme lyase	Probable cytochrome c-type heme lyase OS=Caenorhabditis elegans OX=6239 GN=cchl-1 PE=3 SV=1	cytochrome c-type heme lyase-like [Spodoptera litura]
TRINITY_DN30533_c1_g3	257.308	919.683	1.83656	0.000306544	0.01281	up	--	--	--	K19465|1e-156|haw:110384498|K19465 MGME1; mitochondrial genome maintenance exonuclease 1 [EC:3.1.-.-]	--	--	PD-(D/E)XK nuclease superfamily	--	mitochondrial genome maintenance exonuclease 1-like [Spodoptera litura]
TRINITY_DN29112_c0_g1	5374.63	2334.96	-1.20281	0.00121565	0.0343022	down	--	--	Biological Process: epithelial cell development (GO:0002064);; Molecular Function: voltage-gated ion channel activity (GO:0005244);; Molecular Function: chloride channel activity (GO:0005254);; Cellular Component: lysosome (GO:0005764);; Cellular Component: integral component of plasma membrane (GO:0005887);; Cellular Component: apical plasma membrane (GO:0016324);; Cellular Component: chloride c…	K05022|1e-158|haw:110373235|K05022 CLIC2; chloride intracellular channel protein 2	[P]	Inorganic ion transport and metabolism	--	Chloride intracellular channel exc-4 OS=Caenorhabditis elegans OX=6239 GN=exc-4 PE=1 SV=2	chloride intracellular channel exc-4 isoform X1 [Helicoverpa armigera]
TRINITY_DN26827_c0_g2	1665.17	475.004	-1.80933	0.00207666	0.0490257	down	[E]	Amino acid transport and metabolism	Molecular Function: serine-type carboxypeptidase activity (GO:0004185);; Cellular Component: extracellular region (GO:0005576);;	K09646|1e-118|haw:110384447|K09646 SCPEP1; serine carboxypeptidase 1 [EC:3.4.16.-]	[O]	Posttranslational modification, protein turnover, chaperones	Serine carboxypeptidase	Vitellogenic carboxypeptidase OS=Aedes aegypti OX=7159 GN=VCP PE=1 SV=3	retinoid-inducible serine carboxypeptidase-like [Spodoptera litura]
TRINITY_DN31235_c1_g2	388.168	1854.85	2.25667	0.00183139	0.0448063	up	[O]	Posttranslational modification, protein turnover, chaperones	Molecular Function: serine-type endopeptidase activity (GO:0004252);; Cellular Component: extracellular region (GO:0005576);; Biological Process: proteolysis (GO:0006508);; Biological Process: maternal specification of dorsal/ventral axis, oocyte, germ-line encoded (GO:0007311);; Biological Process: Toll signaling pathway (GO:0008063);; Molecular Function: peptidase activity (GO:0008233);; Molecu…	--|0.0|haw:110380735|hypothetical protein	[E]	Amino acid transport and metabolism	Trypsin;; Serine protease gd N-terminus;; Chymotrypsin family Peptidase-S1	Serine protease gd OS=Drosophila melanogaster OX=7227 GN=gd PE=1 SV=2	serine protease gd-like isoform X7 [Spodoptera litura]
TRINITY_DN20574_c4_g6	11.2079	315.364	4.82631	3.26e-16	4.02e-13	up	[P]	Inorganic ion transport and metabolism	Molecular Function: double-stranded DNA binding (GO:0003690);; Cellular Component: extracellular region (GO:0005576);; Biological Process: neuropeptide signaling pathway (GO:0007218);; Biological Process: killing of cells of other organism (GO:0031640);; Biological Process: defense response to bacterium (GO:0042742);; Biological Process: defense response to Gram-negative bacterium (GO:0050829);; …	--|1e-18|pxy:105392908|hypothetical protein	--	--	--	Neuropeptide-like protein 31 OS=Caenorhabditis elegans OX=6239 GN=nlp-31 PE=2 SV=1	glycine-rich cell wall structural protein-like [Spodoptera litura]
TRINITY_DN19529_c0_g1	175.576	0	-10.1249	3.2e-07	5.78e-05	down	--	--	Molecular Function: structural constituent of cuticle (GO:0042302);;	--|1e-49|tnl:113498190|hypothetical protein	--	--	--	Cuticle protein 16.5, isoform B OS=Locusta migratoria OX=7004 PE=1 SV=1	cuticle protein 16.5-like [Spodoptera litura]
TRINITY_DN25391_c2_g1	9021.39	36.7345	-7.94075	0.00207068	0.0489626	down	--	--	Molecular Function: structural constituent of cuticle (GO:0042302);;	--|9e-33|haw:110370213|hypothetical protein	--	--	--	Cuticle protein 16.5, isoform A OS=Locusta migratoria OX=7004 PE=1 SV=1	cuticle protein 16.5-like [Spodoptera litura]
TRINITY_DN22106_c1_g1	27632.6	9944.21	-1.47444	1.86e-05	0.00152749	down	[I]	Lipid transport and metabolism	Molecular Function: fatty-acyl-CoA binding (GO:0000062);; Biological Process: transport (GO:0006810);; Molecular Function: lipid binding (GO:0008289);;	--|4e-48|haw:110372695|hypothetical protein	[I]	Lipid transport and metabolism	Acyl CoA binding protein	Acyl-CoA-binding protein homolog OS=Manduca sexta OX=7130 PE=3 SV=1	acyl-CoA-binding protein homolog isoform X2 [Spodoptera litura]
TRINITY_DN19391_c0_g1	1143.72	425.434	-1.4263	0.0004231	0.01611	down	[J]	Translation, ribosomal structure and biogenesis	Biological Process: formation of translation preinitiation complex (GO:0001731);; Biological Process: translation reinitiation (GO:0002188);; Molecular Function: RNA binding (GO:0003723);; Cellular Component: cytosolic small ribosomal subunit (GO:0022627);; Cellular Component: protein-containing complex (GO:0043234);; Biological Process: positive regulation of translational initiation (GO:0045948…	K07575|1e-130|tnl:113499897|K07575 K07575; PUA domain protein	[J]	Translation, ribosomal structure and biogenesis	PUA domain	Malignant T-cell-amplified sequence 1 homolog OS=Drosophila melanogaster OX=7227 GN=MCTS1 PE=1 SV=1	malignant T-cell-amplified sequence 1 homolog [Spodoptera litura]
TRINITY_DN20095_c4_g2	689.439	240.012	-1.5214	0.00119273	0.0338812	down	--	--	Molecular Function: structural constituent of ribosome (GO:0003735);; Cellular Component: mitochondrial large ribosomal subunit (GO:0005762);; Biological Process: translation (GO:0006412);; Biological Process: mitochondrial translation (GO:0032543);;	K17433|7e-58|haw:110375517|K17433 MRPL52; large subunit ribosomal protein L52	--	--	--	39S ribosomal protein L52, mitochondrial OS=Drosophila melanogaster OX=7227 GN=mRpL52 PE=2 SV=1	39S ribosomal protein L52, mitochondrial [Spodoptera litura]
TRINITY_DN24999_c0_g2	0	10.2356	5.64175	0.00162009	0.0418456	up	--	--	Cellular Component: mitochondrion (GO:0005739);; Cellular Component: lipid droplet (GO:0005811);; Biological Process: lipid metabolic process (GO:0006629);; Cellular Component: integral component of membrane (GO:0016021);; Molecular Function: oxidoreductase activity (GO:0016491);; Molecular Function: heme binding (GO:0020037);; Molecular Function: metal ion binding (GO:0046872);;	--|2e-45|haw:110384000|hypothetical protein	[I]	Lipid transport and metabolism	Cytochrome b5-like Heme/Steroid binding domain	Cytochrome b5-related protein OS=Drosophila melanogaster OX=7227 GN=Cyt-b5-r PE=2 SV=2	desaturase [Spodoptera exigua]
TRINITY_DN23630_c2_g4	1.0218	68.7639	6.00953	2.45e-05	0.00191348	up	--	--	Molecular Function: DNA binding (GO:0003677);;	--|3e-21|aga:AgaP_AGAP011901|hypothetical protein	--	--	--	Uncharacterized proline-rich protein (Fragment) OS=Owenia fusiformis OX=6347 PE=4 SV=1	H/ACA ribonucleoprotein complex subunit 1-like [Spodoptera litura]
TRINITY_DN31452_c1_g1	35.7545	179.506	2.32165	0.000672659	0.0223676	up	[R]	General function prediction only	Molecular Function: cation channel activity (GO:0005261);; Molecular Function: calcium channel activity (GO:0005262);; Biological Process: cation transport (GO:0006812);; Biological Process: potassium ion transport (GO:0006813);; Biological Process: calcium ion transport (GO:0006816);; Biological Process: response to heat (GO:0009408);; Cellular Component: integral component of membrane (GO:00160…	--|0.0|tnl:113494376|hypothetical protein	[R]	General function prediction only	Ankyrin repeats (3 copies);; Ankyrin repeats (many copies);; Ankyrin repeats (many copies);; Ankyrin repeat;; Ankyrin repeat;; Ion transport protein	Transient receptor potential channel pyrexia OS=Drosophila melanogaster OX=7227 GN=pyx PE=2 SV=2	uncharacterized protein LOC111351107 [Spodoptera litura]
TRINITY_DN25710_c0_g1	238.706	0.804481	-8.18581	3.34e-05	0.00243713	down	[E]	Amino acid transport and metabolism	Cellular Component: extracellular region (GO:0005576);; Molecular Function: oxidoreductase activity, acting on CH-OH group of donors (GO:0016614);; Molecular Function: flavin adenine dinucleotide binding (GO:0050660);;	--|1e-135|haw:110378382|hypothetical protein	[R]	General function prediction only	GMC oxidoreductase;; GMC oxidoreductase	Glucose dehydrogenase [FAD, quinone] OS=Drosophila pseudoobscura pseudoobscura OX=46245 GN=Gld PE=3 SV=4	uncharacterized protein LOC111359662 [Spodoptera litura]
TRINITY_DN31944_c4_g3	92.8266	368.227	1.98627	0.00210457	0.0494875	up	--	--	--	--|1e-43|haw:110383756|hypothetical protein	--	--	--	--	lipase member H-like [Spodoptera litura]
TRINITY_DN22279_c1_g1	146.238	679.427	2.22052	3.28e-05	0.00240815	up	--	--	--	--|1e-42|tnl:113501975|hypothetical protein	--	--	--	--	uncharacterized protein LOC111353150 [Spodoptera litura]
TRINITY_DN21433_c3_g1	1524.08	484.255	-1.65443	0.000342029	0.013806	down	--	--	--	--|1e-55|haw:110377859|hypothetical protein	--	--	--	--	uncharacterized protein LOC111358092 [Spodoptera litura]
TRINITY_DN29435_c0_g1	135.453	533.953	1.98114	0.000991731	0.0295604	up	[Q]	Secondary metabolites biosynthesis, transport and catabolism	Molecular Function: monooxygenase activity (GO:0004497);; Molecular Function: iron ion binding (GO:0005506);; Cellular Component: endoplasmic reticulum membrane (GO:0005789);; Molecular Function: oxidoreductase activity (GO:0016491);; Molecular Function: oxidoreductase activity, acting on paired donors, with incorporation or reduction of molecular oxygen (GO:0016705);; Molecular Function: heme bi…	K15003|9e-70|haw:110378477|K15003 CYP9; cytochrome P450 family 9 [EC:1.14.-.-]	[Q]	Secondary metabolites biosynthesis, transport and catabolism	Cytochrome P450;; Cytochrome P450	Probable cytochrome P450 9h1 OS=Drosophila melanogaster OX=7227 GN=Cyp9h1 PE=3 SV=1	cytochrome P450 9A59 [Spodoptera frugiperda]
TRINITY_DN27456_c7_g2	650.378	20.3036	-5.00604	0.00100718	0.0299305	down	--	--	Cellular Component: nucleus (GO:0005634);; Cellular Component: perinuclear region of cytoplasm (GO:0048471);; Biological Process: rhythmic process (GO:0048511);;	--|4e-79|haw:110374320|hypothetical protein	--	--	--	Period circadian protein (Fragment) OS=Drosophila serrata OX=7274 GN=per PE=3 SV=1	skin secretory protein xP2-like [Helicoverpa armigera]
TRINITY_DN19608_c0_g1	1450.86	571.411	-1.34442	0.00111632	0.0322363	down	--	--	--	--|2e-49|haw:110384569|hypothetical protein	--	--	NADH dehydrogenase [ubiquinone] flavoprotein 3, mitochondrial	--	uncharacterized protein LOC110384569 [Helicoverpa armigera]
TRINITY_DN30294_c0_g2	22.1427	134.399	2.60277	2.57e-06	0.000317194	up	--	--	Cellular Component: nucleus (GO:0005634);; Cellular Component: cytoplasm (GO:0005737);; Biological Process: cytoskeleton organization (GO:0007010);; Biological Process: negative regulation of cell adhesion (GO:0007162);; Biological Process: JAK-STAT cascade (GO:0007259);; Biological Process: ovarian follicle cell-cell adhesion (GO:0007299);; Molecular Function: Ran GTPase binding (GO:0008536);; C…	K23334|4e-19|kmr:108251401|K23334 RANBP9_10; Ran-binding protein 9/10	--	--	--	Ran-binding proteins 9/10 homolog OS=Drosophila melanogaster OX=7227 GN=RanBPM PE=1 SV=1	PREDICTED: ran-binding protein 10 [Papilio polytes]
TRINITY_DN25553_c0_g1	3157.62	641.826	-2.29853	0.00138766	0.0376552	down	[R]	General function prediction only	--	--|1e-103|tnl:113501760|hypothetical protein	[Q]	Secondary metabolites biosynthesis, transport and catabolism	short chain dehydrogenase;; Enoyl-(Acyl carrier protein) reductase	Protein dhs-3 OS=Caenorhabditis elegans OX=6239 GN=dhs-3 PE=1 SV=1	17-beta-hydroxysteroid dehydrogenase 13-like isoform X2 [Spodoptera litura]
TRINITY_DN20672_c1_g2	0.364207	87.1743	7.76647	5.41e-08	1.29e-05	up	--	--	--	--|4e-19|tnl:113498281|hypothetical protein	--	--	--	--	moricin B3 [Bombyx mandarina]
TRINITY_DN19743_c0_g6	0	11.557	5.81254	0.000445581	0.016711	up	[J]	Translation, ribosomal structure and biogenesis	Molecular Function: translation elongation factor activity (GO:0003746);; Molecular Function: GTPase activity (GO:0003924);; Molecular Function: GTP binding (GO:0005525);; Cellular Component: cytoplasm (GO:0005737);;	K03234|0.0|hcq:109532160|K03234 EEF2; elongation factor 2	[J]	Translation, ribosomal structure and biogenesis	Elongation factor Tu GTP binding domain;; Elongation factor G, domain IV;; Elongation factor G C-terminus;; Elongation factor Tu domain 2;; Elongation Factor G, domain II;; 50S ribosome-binding GTPase	Elongation factor 2 OS=Caenorhabditis elegans OX=6239 GN=eef-2 PE=1 SV=4	PREDICTED: elongation factor 2-like [Branchiostoma belcheri]
TRINITY_DN29352_c2_g1	12.4214	77.6404	2.6679	0.000824597	0.026046	up	--	--	Molecular Function: monooxygenase activity (GO:0004497);; Molecular Function: iron ion binding (GO:0005506);; Cellular Component: endoplasmic reticulum membrane (GO:0005789);; Molecular Function: oxidoreductase activity, acting on paired donors, with incorporation or reduction of molecular oxygen (GO:0016705);; Molecular Function: heme binding (GO:0020037);; Cellular Component: organelle membrane…	K15001|3e-22|haw:110384433|K15001 CYP4; cytochrome P450 family 4 [EC:1.14.-.-]	[QI]	--	Cytochrome P450	Cytochrome P450 4c3 OS=Drosophila melanogaster OX=7227 GN=Cyp4c3 PE=2 SV=1	cytochrome P450, partial [Spodoptera litura]
TRINITY_DN11863_c0_g2	0	9.5017	5.53022	0.000954295	0.0287336	up	[J]	Translation, ribosomal structure and biogenesis	Molecular Function: structural constituent of ribosome (GO:0003735);; Cellular Component: ribosome (GO:0005840);; Biological Process: translation (GO:0006412);;	K02962|5e-49|els:105013751|K02962 RP-S17e; small subunit ribosomal protein S17e	[J]	Translation, ribosomal structure and biogenesis	Ribosomal S17	40S ribosomal protein S17 OS=Spodoptera frugiperda OX=7108 GN=RpS17 PE=2 SV=3	40S ribosomal protein S17-B-like, partial [Mizuhopecten yessoensis]
TRINITY_DN19476_c0_g1	500.92	0.271438	-10.6764	2.45e-10	1.21e-07	down	[IQR]	--	Cellular Component: cytoplasm (GO:0005737);; Biological Process: apoptotic process (GO:0006915);; Biological Process: response to ionizing radiation (GO:0010212);; Biological Process: Wnt signaling pathway (GO:0016055);; Molecular Function: oxidoreductase activity (GO:0016491);; Biological Process: defense response to Gram-negative bacterium (GO:0050829);; Biological Process: regulation of reacti…	--|0.0|haw:110381972|hypothetical protein	[Q]	Secondary metabolites biosynthesis, transport and catabolism	short chain dehydrogenase;; Enoyl-(Acyl carrier protein) reductase;; KR domain	WW domain-containing oxidoreductase OS=Drosophila melanogaster OX=7227 GN=Wwox PE=2 SV=1	retinol dehydrogenase 12-like [Spodoptera litura]
TRINITY_DN23845_c3_g1	2.31322	21.2945	3.12625	0.000875846	0.0270027	up	--	--	--	--|2e-11|obo:113563540|hypothetical protein	--	--	--	--	uncharacterized protein LOC111354134, partial [Spodoptera litura]
TRINITY_DN18959_c0_g1	230.653	4.01696	-5.818	1.21e-10	6.31e-08	down	--	--	Molecular Function: extracellular matrix structural constituent (GO:0005201);; Cellular Component: extracellular matrix (GO:0031012);; Biological Process: cellular response to ecdysone (GO:0071390);;	--|5e-80|srx:107711439|hypothetical protein	--	--	Pentapeptide repeats (8 copies)	Salivary glue protein Sgs-3 OS=Drosophila melanogaster OX=7227 GN=Sgs3 PE=2 SV=1	uncharacterized protein LOC111349430 [Spodoptera litura]
TRINITY_DN17604_c0_g1	30.5564	221.191	2.85662	1.04e-05	0.000969459	up	--	--	--	--|1e-126|haw:110374539|hypothetical protein	[S]	Function unknown	--	--	paxillin isoform X6 [Spodoptera litura]
TRINITY_DN25771_c1_g1	1.82103	35.6496	4.27525	0.000380627	0.0149963	up	--	--	--	K03098|7e-11|tnl:113504828|K03098 APOD; apolipoprotein D and lipocalin family protein	--	--	--	--	insecticyanin-A-like [Spodoptera litura]
TRINITY_DN18685_c0_g1	110.805	6.03201	-4.20937	0.000401672	0.0154555	down	--	--	--	--|3e-76|haw:110380992|hypothetical protein	--	--	--	--	uncharacterized protein LOC111356699 [Spodoptera litura]
TRINITY_DN25004_c1_g1	2467.52	632.609	-1.96379	0.000253193	0.0111135	down	[R]	General function prediction only	Cellular Component: nucleus (GO:0005634);; Cellular Component: mitochondrion (GO:0005739);; Biological Process: DNA catabolic process (GO:0006308);; Biological Process: programmed cell death (GO:0012501);; Molecular Function: oxidoreductase activity (GO:0016491);; Biological Process: chromosome condensation (GO:0030261);; Cellular Component: phagocytic vesicle (GO:0045335);; Biological Process: c…	K22747|0.0|haw:110370809|K22747 AIFM3; apoptosis-inducing factor 3	[R]	General function prediction only	Pyridine nucleotide-disulphide oxidoreductase;; Rieske [2Fe-2S] domain;; Pyridine nucleotide-disulphide oxidoreductase;; Pyridine nucleotide-disulphide oxidoreductase;; Rieske-like [2Fe-2S] domain;; FAD-NAD(P)-binding;; Tryptophan halogenase	Apoptosis-inducing factor 1, mitochondrial OS=Dictyostelium discoideum OX=44689 GN=aif PE=2 SV=1	apoptosis-inducing factor 3 isoform X1 [Spodoptera litura]
TRINITY_DN22855_c2_g4	18.1248	108.986	2.58134	0.000517406	0.0185141	up	[N]	Cell motility	Molecular Function: translation initiation factor activity (GO:0003743);; Cellular Component: cytosol (GO:0005829);; Cellular Component: eukaryotic translation initiation factor 3 complex (GO:0005852);; Biological Process: regulation of translational initiation (GO:0006446);;	--|7e-48|haw:110372927|hypothetical protein	--	--	Kazal-type serine protease inhibitor domain;; Kazal-type serine protease inhibitor domain	Eukaryotic translation initiation factor 3 subunit A OS=Drosophila willistoni OX=7260 GN=eIF3a PE=3 SV=1	collagen alpha-1(IV) chain-like [Spodoptera litura]
TRINITY_DN22810_c6_g1	1260.4	443.984	-1.50549	0.000363528	0.0145216	down	[G]	Carbohydrate transport and metabolism	Molecular Function: magnesium ion binding (GO:0000287);; Molecular Function: phosphoglucomutase activity (GO:0004614);; Biological Process: glucose metabolic process (GO:0006006);;	K01835|2e-58|tnl:113503659|K01835 pgm; phosphoglucomutase [EC:5.4.2.2]	[G]	Carbohydrate transport and metabolism	Phosphoglucomutase/phosphomannomutase, C-terminal domain	Phosphoglucomutase OS=Drosophila simulans OX=7240 GN=Pgm PE=3 SV=1	phosphoglucomutase [Spodoptera litura]
TRINITY_DN22649_c0_g4	3448.94	338.269	-3.35047	3.7e-07	6.52e-05	down	--	--	--	--|4e-58|haw:110382194|hypothetical protein	--	--	Chitin binding Peritrophin-A domain	Protein obstructor-E OS=Drosophila melanogaster OX=7227 GN=obst-E PE=2 SV=2	protein obstructor-E-like [Spodoptera litura]
TRINITY_DN25712_c2_g2	129.83	823.466	2.66501	5.53e-06	0.000583194	up	--	--	Molecular Function: structural molecule activity (GO:0005198);; Cellular Component: extracellular region (GO:0005576);;	--|7e-50|haw:110369644|hypothetical protein	--	--	Fibroin P25;; Fibroin P25	Fibrohexamerin OS=Galleria mellonella OX=7137 GN=P25 PE=1 SV=1	fibrohexamerin-like [Spodoptera litura]
TRINITY_DN25493_c0_g1	130.683	1005.21	2.94156	5.04e-05	0.00331678	up	--	--	Molecular Function: serine-type endopeptidase activity (GO:0004252);; Cellular Component: extracellular space (GO:0005615);; Biological Process: digestion (GO:0007586);; Biological Process: collagen catabolic process (GO:0030574);;	--|2e-16|haw:110384490|hypothetical protein	[E]	Amino acid transport and metabolism	Trypsin;; Trypsin	Chymotrypsin OS=Phaedon cochleariae OX=80249 PE=2 SV=1	brachyurin-like [Spodoptera litura]
TRINITY_DN22993_c0_g1	385.402	39.8828	-3.27346	0.000944085	0.0285591	down	--	--	Cellular Component: extracellular region (GO:0005576);; Molecular Function: structural constituent of chitin-based larval cuticle (GO:0008010);; Molecular Function: chitin binding (GO:0008061);; Molecular Function: extracellular matrix constituent conferring elasticity (GO:0030023);; Cellular Component: extracellular matrix (GO:0031012);; Cellular Component: protein-carbohydrate complex (GO:00329…	--|1e-127|haw:110377989|hypothetical protein	--	--	Insect cuticle protein	Pro-resilin OS=Drosophila melanogaster OX=7227 GN=resilin PE=1 SV=1	pro-resilin-like [Spodoptera litura]
TRINITY_DN24005_c0_g4	21.1259	0	-7.06834	0.00134182	0.0367426	down	--	--	Molecular Function: structural constituent of cuticle (GO:0042302);;	--|7e-21|haw:110370162|hypothetical protein	--	--	--	Pupal cuticle protein C1B OS=Tenebrio molitor OX=7067 PE=1 SV=1	pupal cuticle protein C1B-like [Spodoptera litura]
TRINITY_DN31929_c3_g1	150.054	868.444	2.53624	2.68e-06	0.000326847	up	[F]	Nucleotide transport and metabolism	Molecular Function: xanthine dehydrogenase activity (GO:0004854);; Molecular Function: xanthine oxidase activity (GO:0004855);; Molecular Function: iron ion binding (GO:0005506);; Cellular Component: peroxisome (GO:0005777);; Cellular Component: cytosol (GO:0005829);; Cellular Component: microtubule associated complex (GO:0005875);; Biological Process: purine nucleobase metabolic process (GO:0006…	K00106|0.0|tnl:113503882|K00106 XDH; xanthine dehydrogenase/oxidase [EC:1.17.1.4 1.17.3.2]	[F]	Nucleotide transport and metabolism	Molybdopterin-binding domain of aldehyde dehydrogenase;; [2Fe-2S] binding domain;; Aldehyde oxidase and xanthine dehydrogenase, a/b hammerhead domain;; CO dehydrogenase flavoprotein C-terminal domain;; FAD binding domain in molybdopterin dehydrogenase;; 2Fe-2S iron-sulfur cluster binding domain	Xanthine dehydrogenase OS=Drosophila melanogaster OX=7227 GN=ry PE=2 SV=2	indole-3-acetaldehyde oxidase-like [Spodoptera litura]
TRINITY_DN29272_c0_g2	0.293391	37.5488	6.55133	0.00194006	0.0466692	up	--	--	Molecular Function: structural constituent of cell wall (GO:0005199);; Biological Process: sporulation resulting in formation of a cellular spore (GO:0030435);; Cellular Component: spore wall (GO:0031160);; Cellular Component: cytoplasmic vesicle (GO:0031410);; Biological Process: spore wall assembly (GO:0042244);;	K07604|7e-43|sasa:106594684|K07604 KRT1; type I keratin, acidic	--	--	--	Spore coat protein SP65 OS=Dictyostelium discoideum OX=44689 GN=cotE PE=1 SV=1	nascent polypeptide-associated complex subunit alpha, muscle-specific form-like [Spodoptera litura]
TRINITY_DN20620_c0_g1	4.15752	42.3094	3.31752	3.62e-05	0.0026131	up	--	--	Molecular Function: RNA-directed DNA polymerase activity (GO:0003964);; Biological Process: transposition, DNA-mediated (GO:0006313);;	--|3e-89|tnl:113494593|hypothetical protein	[R]	General function prediction only	Reverse transcriptase (RNA-dependent DNA polymerase)	Probable RNA-directed DNA polymerase from transposon BS OS=Drosophila melanogaster OX=7227 GN=RTase PE=2 SV=1	hypothetical protein B5V51_9240 [Heliothis virescens]
TRINITY_DN26358_c0_g1	9569.46	2499.57	-1.93672	7.35e-05	0.00451852	down	--	--	Molecular Function: monophenol monooxygenase activity (GO:0004503);; Cellular Component: extracellular region (GO:0005576);; Biological Process: melanin biosynthetic process from tyrosine (GO:0006583);; Biological Process: defense response (GO:0006952);; Molecular Function: metal ion binding (GO:0046872);;	--|3e-25|haw:110378698|hypothetical protein	--	--	Hemocyanin, ig-like domain	Phenoloxidase subunit 1 OS=Bombyx mori OX=7091 PE=1 SV=2	prophenoloxidase subunit 1 [Spodoptera frugiperda]
TRINITY_DN18341_c0_g1	2166.89	686.645	-1.65791	4.02e-06	0.000450609	down	--	--	--	K00420|2e-26|tnl:113500460|K00420 QCR10; ubiquinol-cytochrome c reductase subunit 10	--	--	Ubiquinol-cytochrome C reductase complex, 6.4kD protein	--	cytochrome b-c1 complex subunit 10 [Spodoptera litura]
TRINITY_DN25954_c0_g1	9.10663	124.33	3.78757	0.000557165	0.0196053	up	--	--	Molecular Function: serine-type endopeptidase activity (GO:0004252);; Cellular Component: plasma membrane (GO:0005886);; Biological Process: proteolysis (GO:0006508);; Biological Process: cytoskeleton organization (GO:0007010);; Cellular Component: integral component of membrane (GO:0016021);; Biological Process: wing disc development (GO:0035220);; Biological Process: actin filament bundle assem…	--|0.0|haw:110373798|hypothetical protein	[E]	Amino acid transport and metabolism	Trypsin	Serine proteinase stubble OS=Drosophila melanogaster OX=7227 GN=Sb PE=2 SV=2	serine proteinase stubble-like [Spodoptera litura]
TRINITY_DN22722_c1_g1	15.2263	266.9	4.13675	0.000622864	0.0213929	up	--	--	--	--|9e-32|haw:110371304|hypothetical protein	--	--	--	--	calphotin-like [Spodoptera litura]
TRINITY_DN30297_c1_g1	20.2959	76.0613	1.89452	0.000878211	0.0270474	up	--	--	--	--|1e-21|haw:110383450|hypothetical protein	--	--	--	--	uncharacterized protein LOC110383450 isoform X1 [Helicoverpa armigera]
TRINITY_DN15820_c0_g1	4025.39	161.984	-4.63586	0.00104672	0.0307357	down	--	--	Molecular Function: structural constituent of cuticle (GO:0042302);;	--|2e-37|haw:110384124|hypothetical protein	--	--	--	Cuticle protein CP14.6 OS=Manduca sexta OX=7130 GN=CP14.6 PE=2 SV=1	endocuticle structural glycoprotein SgAbd-5-like [Spodoptera litura]
TRINITY_DN23204_c0_g1	3.64207	301.541	6.36077	4.91e-07	8.13e-05	up	--	--	Cellular Component: extracellular region (GO:0005576);; Biological Process: killing of cells of other organism (GO:0031640);; Biological Process: defense response to bacterium (GO:0042742);; Biological Process: innate immune response (GO:0045087);; Biological Process: defense response to fungus (GO:0050832);;	--	--	--	--	Spodomicin OS=Spodoptera littoralis OX=7109 PE=1 SV=1	diapausin A4 [Spodoptera exigua]
TRINITY_DN22649_c0_g1	8373.36	1045.9	-3.00126	9.54e-08	1.98e-05	down	--	--	--	--|8e-33|haw:110382194|hypothetical protein	--	--	--	Protein obstructor-E OS=Drosophila melanogaster OX=7227 GN=obst-E PE=2 SV=2	protein obstructor-E-like [Spodoptera litura]
TRINITY_DN29944_c0_g1	33.1599	1173.3	5.14759	6.48e-08	1.47e-05	up	[E]	Amino acid transport and metabolism	Cellular Component: extracellular region (GO:0005576);; Biological Process: glucose metabolic process (GO:0006006);; Biological Process: pupal chitin-based cuticle development (GO:0008364);; Molecular Function: oxidoreductase activity, acting on CH-OH group of donors (GO:0016614);; Biological Process: sensory perception of pain (GO:0019233);; Biological Process: sperm storage (GO:0046693);; Molec…	K00108|0.0|haw:110378425|K00108 betA; choline dehydrogenase [EC:1.1.99.1]	[R]	General function prediction only	GMC oxidoreductase;; GMC oxidoreductase	Glucose dehydrogenase [FAD, quinone] OS=Drosophila melanogaster OX=7227 GN=Gld PE=3 SV=3	glucose dehydrogenase [FAD, quinone]-like [Spodoptera litura]
TRINITY_DN20571_c1_g1	28.3044	3.36874	-3.07307	0.000110039	0.00609389	down	--	--	--	--	--	--	--	--	Uncharacterized protein APZ42_005135 [Daphnia magna]
TRINITY_DN24222_c6_g4	28.3752	127.643	2.15779	9.58e-05	0.00551971	up	--	--	--	K15909|3e-10|xtr:100485745|K15909 SHIP2; phosphatidylinositol-3,4,5-trisphosphate 5-phosphatase 2 [EC:3.1.3.86]	--	--	--	--	hypothetical protein EAI_09775, partial [Harpegnathos saltator]
TRINITY_DN29461_c2_g2	762.692	333.76	-1.19184	0.00136629	0.0372748	down	[O]	Posttranslational modification, protein turnover, chaperones	Molecular Function: ATP binding (GO:0005524);; Cellular Component: chaperonin-containing T-complex (GO:0005832);; Biological Process: protein folding (GO:0006457);; Biological Process: 'de novo' protein folding (GO:0006458);; Molecular Function: protein binding involved in protein folding (GO:0044183);; Molecular Function: unfolded protein binding (GO:0051082);; Biological Process: chaperone-medi…	K09497|1e-121|haw:110384618|K09497 CCT5; T-complex protein 1 subunit epsilon	[O]	Posttranslational modification, protein turnover, chaperones	TCP-1/cpn60 chaperonin family	T-complex protein 1 subunit epsilon OS=Caenorhabditis elegans OX=6239 GN=cct-5 PE=2 SV=1	T-complex protein 1 subunit epsilon [Spodoptera litura]
TRINITY_DN20237_c0_g1	3267.84	712.517	-2.19707	0.000126771	0.00669516	down	[G]	Carbohydrate transport and metabolism	Cellular Component: extracellular region (GO:0005576);; Biological Process: multicellular organism development (GO:0007275);; Biological Process: melanin biosynthetic process (GO:0042438);; Biological Process: male mating behavior (GO:0060179);;	--|0.0|tnl:113491899|hypothetical protein	--	--	Major royal jelly protein	Protein yellow OS=Drosophila erecta OX=7220 GN=y PE=3 SV=1	protein yellow-like [Spodoptera litura]
TRINITY_DN21319_c2_g1	264.492	2320.14	3.13399	3.91e-07	6.82e-05	up	--	--	Molecular Function: serine-type endopeptidase activity (GO:0004252);; Cellular Component: extracellular space (GO:0005615);;	--|5e-57|haw:110384530|hypothetical protein	[E]	Amino acid transport and metabolism	Trypsin	Trypsin CFT-1 OS=Choristoneura fumiferana OX=7141 PE=1 SV=1	collagenase-like [Spodoptera litura]
TRINITY_DN25371_c0_g2	58.5627	591.386	3.33879	2.41e-06	0.000300776	up	[R]	General function prediction only	Biological Process: lipid catabolic process (GO:0016042);; Molecular Function: hydrolase activity, acting on ester bonds (GO:0016788);;	K01052|1e-92|haw:110378677|K01052 LIPA; lysosomal acid lipase/cholesteryl ester hydrolase [EC:3.1.1.13]	[I]	Lipid transport and metabolism	Partial alpha/beta-hydrolase lipase region;; alpha/beta hydrolase fold	Lipase 3 OS=Drosophila melanogaster OX=7227 GN=Lip3 PE=2 SV=1	lipase 3-like [Spodoptera litura]
TRINITY_DN18291_c0_g1	1998.83	489.321	-2.03019	0.00149935	0.0395572	down	--	--	Molecular Function: structural constituent of cuticle (GO:0042302);;	--|2e-60|haw:110375279|hypothetical protein	--	--	--	Cuticle protein 8 OS=Locusta migratoria OX=7004 PE=1 SV=1	uncharacterized protein LOC111349161 [Spodoptera litura]
TRINITY_DN17989_c0_g1	2389.54	915.201	-1.38485	0.00207301	0.0489786	down	--	--	Cellular Component: cytoplasm (GO:0005737);; Biological Process: intracellular distribution of mitochondria (GO:0048312);;	K03255|8e-24|tnl:113499022|K03255 TIF31; protein TIF31	[R]	General function prediction only	--	Clustered mitochondria protein homolog OS=Anopheles gambiae OX=7165 GN=AGAP011851 PE=3 SV=4	clustered mitochondria protein homolog isoform X3 [Spodoptera litura]
TRINITY_DN27776_c0_g1	630.362	1776.87	1.49438	0.00113632	0.0326089	up	[IQR]	--	--	K00079|7e-85|haw:110376990|K00079 CBR1; carbonyl reductase 1 [EC:1.1.1.184 1.1.1.189 1.1.1.197]	[Q]	Secondary metabolites biosynthesis, transport and catabolism	Enoyl-(Acyl carrier protein) reductase;; short chain dehydrogenase	--	carbonyl reductase [NADPH] 3-like [Spodoptera litura]
TRINITY_DN25718_c0_g1	24.2678	80.3414	1.71849	0.000467448	0.0172903	up	--	--	--	--|1e-172|haw:110373918|hypothetical protein	--	--	--	--	uncharacterized protein LOC111364410 [Spodoptera litura]
TRINITY_DN26503_c0_g1	1206.7	194.921	-2.63061	5.98e-07	9.48e-05	down	--	--	Molecular Function: monooxygenase activity (GO:0004497);; Molecular Function: iron ion binding (GO:0005506);; Cellular Component: endoplasmic reticulum membrane (GO:0005789);; Molecular Function: oxidoreductase activity, acting on paired donors, with incorporation or reduction of molecular oxygen (GO:0016705);; Molecular Function: heme binding (GO:0020037);; Cellular Component: organelle membrane…	K15001|1e-159|haw:110384165|K15001 CYP4; cytochrome P450 family 4 [EC:1.14.-.-]	[QI]	--	Cytochrome P450	Cytochrome P450 4d2 OS=Drosophila melanogaster OX=7227 GN=Cyp4d2 PE=2 SV=2	cytochrome P450 4C1-like [Spodoptera litura]
TRINITY_DN22136_c0_g1	3.48678	56.4079	3.92595	5.06e-06	0.000539305	up	--	--	--	--|8e-36|haw:110381746|hypothetical protein	--	--	--	Histidine-rich glycoprotein OS=Plasmodium lophurae OX=5853 PE=4 SV=1	histidine-rich glycoprotein-like [Spodoptera litura]
TRINITY_DN19514_c0_g2	65.0695	343.23	2.39653	0.000587904	0.0204442	up	--	--	--	--|1e-05|haw:110370419|hypothetical protein	--	--	--	--	uncharacterized protein LOC111355283 [Spodoptera litura]
TRINITY_DN32061_c5_g1	22.6061	112.143	2.29468	0.000408185	0.0156857	up	--	--	Biological Process: microtubule cytoskeleton organization (GO:0000226);; Cellular Component: cytoplasm (GO:0005737);; Cellular Component: microtubule (GO:0005874);; Cellular Component: microtubule associated complex (GO:0005875);; Biological Process: microtubule-based process (GO:0007017);; Biological Process: nervous system development (GO:0007399);; Biological Process: axonogenesis (GO:0007409)…	--|0.0|tnl:113499219|hypothetical protein	[Z]	Cytoskeleton	--	Microtubule-associated protein futsch OS=Drosophila melanogaster OX=7227 GN=futsch PE=1 SV=4	uncharacterized protein LOC111348791 [Spodoptera litura]
TRINITY_DN30924_c1_g3	848.62	73.6263	-3.52528	3.48e-06	0.000404031	down	[GEPR]	--	Cellular Component: integral component of plasma membrane (GO:0005887);; Biological Process: germ-band shortening (GO:0007390);; Molecular Function: organic anion transmembrane transporter activity (GO:0008514);; Molecular Function: organic cation transmembrane transporter activity (GO:0015101);; Biological Process: organic cation transport (GO:0015695);; Biological Process: positive regulation o…	--|3e-86|haw:110379846|hypothetical protein	[R]	General function prediction only	Sugar (and other) transporter	Organic cation transporter-like protein OS=Drosophila melanogaster OX=7227 GN=Orct2 PE=2 SV=2	organic cation transporter protein-like [Spodoptera litura]
TRINITY_DN28463_c0_g1	733.974	274.742	-1.41708	0.00111945	0.0322855	down	[T]	Signal transduction mechanisms	Molecular Function: protein serine/threonine phosphatase activity (GO:0004722);; Molecular Function: calcium-dependent protein serine/threonine phosphatase activity (GO:0004723);; Molecular Function: calcium ion binding (GO:0005509);; Molecular Function: calmodulin binding (GO:0005516);; Cellular Component: nucleus (GO:0005634);; Cellular Component: cytoplasm (GO:0005737);; Biological Process: pr…	K13807|0.0|tnl:113508334|K13807 PPEF; serine/threonine-protein phosphatase with EF-hands [EC:3.1.3.16]	[T]	Signal transduction mechanisms	Calcineurin-like phosphoesterase;; EF hand;; EF-hand domain pair;; EF-hand domain;; EF hand;; EF-hand domain pair;; IQ calmodulin-binding motif	Serine/threonine-protein phosphatase rdgC OS=Drosophila melanogaster OX=7227 GN=rdgC PE=2 SV=1	serine/threonine-protein phosphatase rdgC [Spodoptera litura]
TRINITY_DN23531_c1_g1	11.1163	579.682	5.71494	8.52e-06	0.000825093	up	--	--	--	--|5e-07|bmor:101742651|hypothetical protein	--	--	--	--	hypothetical protein RR46_00012 [Papilio xuthus]
TRINITY_DN22104_c1_g3	0	14.7731	6.17076	8.24e-05	0.00498334	up	--	--	--	--|1e-43|haw:110370458|hypothetical protein	--	--	--	--	probable serine/threonine-protein kinase dyrk1 [Helicoverpa armigera]
TRINITY_DN30390_c0_g1	1279.46	301.432	-2.08547	0.000374461	0.0147927	down	[R]	General function prediction only	Molecular Function: methyltransferase activity (GO:0008168);; Molecular Function: metal ion binding (GO:0046872);;	--|0.0|tnl:113494526|hypothetical protein	[B]	Chromatin structure and dynamics	SET domain	SET and MYND domain-containing protein DDB_G0292140 OS=Dictyostelium discoideum OX=44689 GN=DDB_G0292140 PE=3 SV=1	SET and MYND domain-containing protein 4 [Spodoptera litura]
TRINITY_DN23638_c4_g1	0.482062	168.755	8.72151	3.27e-08	8.22e-06	up	--	--	--	--|0.0|haw:110371472|hypothetical protein	--	--	--	--	uncharacterized protein LOC111358211 [Spodoptera litura]
TRINITY_DN21044_c8_g1	1568.01	89.1604	-4.13523	6.38e-06	0.000652166	down	[Q]	Secondary metabolites biosynthesis, transport and catabolism	Molecular Function: monooxygenase activity (GO:0004497);; Molecular Function: iron ion binding (GO:0005506);; Cellular Component: endoplasmic reticulum membrane (GO:0005789);; Molecular Function: oxidoreductase activity, acting on paired donors, with incorporation or reduction of molecular oxygen (GO:0016705);; Molecular Function: heme binding (GO:0020037);; Cellular Component: organelle membrane…	K14999|0.0|haw:110382837|K14999 CYP6; cytochrome P450 family 6 [EC:1.14.-.-]	[Q]	Secondary metabolites biosynthesis, transport and catabolism	Cytochrome P450	Cytochrome P450 6k1 OS=Blattella germanica OX=6973 GN=CYP6K1 PE=2 SV=1	cytochrome P450 6B5-like [Spodoptera litura]
TRINITY_DN20828_c0_g1	92.0342	26.5392	-1.79	0.00167389	0.0425015	down	--	--	Molecular Function: structural constituent of ribosome (GO:0003735);; Cellular Component: ribosome (GO:0005840);; Biological Process: translation (GO:0006412);; Molecular Function: rRNA binding (GO:0019843);;	K02940|1e-07|fcd:110850819|K02940 RP-L9e; large subunit ribosomal protein L9e	[J]	Translation, ribosomal structure and biogenesis	--	60S ribosomal protein L9 OS=Spodoptera frugiperda OX=7108 GN=RpL9 PE=2 SV=1	PREDICTED: 60S ribosomal protein L9-like, partial [Amyelois transitella]
TRINITY_DN33202_c0_g1	0	17.5678	6.42146	7.24e-05	0.00447184	up	--	--	Molecular Function: structural constituent of ribosome (GO:0003735);; Cellular Component: ribosome (GO:0005840);; Biological Process: translation (GO:0006412);;	K02928|3e-07|tca:100191003|K02928 RP-L41e; large subunit ribosomal protein L41e	[J]	Translation, ribosomal structure and biogenesis	--	60S ribosomal protein L41 OS=Spodoptera frugiperda OX=7108 GN=RpL41 PE=3 SV=1	60S ribosomal protein L41 [Calanus sinicus]
TRINITY_DN19741_c0_g2	6.13031	62.1269	3.30381	3.03e-06	0.000356048	up	--	--	--	--	--	--	--	--	unknown protein, partial [Papilio polytes]
TRINITY_DN20102_c3_g1	1514.44	265.445	-2.51146	3.03e-06	0.000356048	down	--	--	Cellular Component: cytoplasm (GO:0005737);; Cellular Component: striated muscle dense body (GO:0055120);;	--|8e-95|haw:110379904|hypothetical protein	[S]	Function unknown	Eukaryotic protein of unknown function (DUF842)	Uncharacterized protein ZK637.2 OS=Caenorhabditis elegans OX=6239 GN=ZK637.2 PE=3 SV=2	protein FAM136A [Spodoptera litura]
TRINITY_DN19540_c0_g2	1078.76	287.187	-1.9086	1.14e-05	0.00104823	down	--	--	--	K17421|2e-95|haw:110373441|K17421 MRPL40; large subunit ribosomal protein L40	[J]	Translation, ribosomal structure and biogenesis	Mitochondrial ribosomal protein L28	--	39S ribosomal protein L40, mitochondrial [Spodoptera litura]
TRINITY_DN19721_c3_g4	6.04936	61.5506	3.33308	6.02e-06	0.000621637	up	--	--	--	--	--	--	--	--	hypothetical protein GIP_L1_00660 [Glyptapanteles indiensis]
TRINITY_DN27841_c1_g1	494.252	80.0819	-2.62559	0.000423576	0.01611	down	[G]	Carbohydrate transport and metabolism	Molecular Function: alpha,alpha-trehalase activity (GO:0004555);; Biological Process: trehalose metabolic process (GO:0005991);; Cellular Component: basolateral plasma membrane (GO:0016323);;	K01194|0.0|haw:110379190|K01194 TREH; alpha,alpha-trehalase [EC:3.2.1.28]	[G]	Carbohydrate transport and metabolism	Trehalase;; Amylo-alpha-1,6-glucosidase	Trehalase OS=Bombyx mori OX=7091 PE=1 SV=1	trehalase [Spodoptera frugiperda]
TRINITY_DN25406_c2_g2	36.6138	0.586591	-5.9867	0.00158065	0.0409725	down	--	--	--	--|1e-100|haw:110384394|hypothetical protein	[W]	Extracellular structures	FAR-17a/AIG1-like protein	--	androgen-dependent TFPI-regulating protein-like [Spodoptera litura]
TRINITY_DN23459_c0_g1	233.759	12.5983	-4.21306	7.22e-05	0.00446453	down	--	--	--	--|2e-17|pxy:105391159|hypothetical protein	--	--	--	--	PREDICTED: uncharacterized protein LOC105391159, partial [Plutella xylostella]
TRINITY_DN29714_c1_g2	0	25.9428	6.98387	4.82e-05	0.00321849	up	--	--	Molecular Function: serine-type carboxypeptidase activity (GO:0004185);; Cellular Component: extracellular region (GO:0005576);;	K09645|1e-111|haw:110373107|K09645 CPVL; vitellogenic carboxypeptidase-like protein [EC:3.4.16.-]	[OE]	--	Serine carboxypeptidase	Vitellogenic carboxypeptidase OS=Aedes aegypti OX=7159 GN=VCP PE=1 SV=3	venom serine carboxypeptidase-like [Spodoptera litura]
TRINITY_DN21980_c3_g1	9.37426	136.223	3.85486	9.94e-05	0.00564976	up	--	--	--	--|5e-10|haw:110381997|hypothetical protein	--	--	Trypsin Inhibitor like cysteine rich domain	--	uncharacterized protein LOC111350535 [Spodoptera litura]
TRINITY_DN17953_c0_g1	0.364207	25.7152	6.00333	0.00149118	0.0394119	up	--	--	--	--|1e-164|haw:110370341|hypothetical protein	--	--	DM4/DM12 family	--	uncharacterized protein LOC111355278 [Spodoptera litura]
TRINITY_DN21974_c4_g1	21.8129	158.926	2.86175	1.37e-05	0.00122147	up	--	--	--	--	--	--	--	--	uncharacterized protein LOC111355974 [Spodoptera litura]
TRINITY_DN18265_c5_g1	73.4607	7.97579	-3.21594	0.00132401	0.0364231	down	--	--	--	--	--	--	--	--	unnamed protein product, partial [Oikopleura dioica]
TRINITY_DN25255_c8_g1	73.4273	281.39	1.94345	0.000541352	0.0191786	up	--	--	Molecular Function: serine-type endopeptidase activity (GO:0004252);; Cellular Component: extracellular region (GO:0005576);; Biological Process: proteolysis (GO:0006508);; Biological Process: innate immune response (GO:0045087);;	K20674|0.0|haw:110382036|K20674 MODSP; modular serine protease [EC:3.4.21.-]	--	--	Low-density lipoprotein receptor domain class A;; Trypsin;; Sushi repeat (SCR repeat)	Modular serine protease OS=Drosophila melanogaster OX=7227 GN=modSP PE=1 SV=2	modular serine protease-like, partial [Spodoptera litura]
TRINITY_DN23073_c2_g1	29.1719	530.812	4.18485	2.07e-06	0.000265906	up	--	--	Biological Process: steroid metabolic process (GO:0008202);; Molecular Function: oxidoreductase activity (GO:0016491);;	K00011|1e-15|haw:110381989|K00011 AKR1B; aldehyde reductase [EC:1.1.1.21]	--	--	--	Aldo-keto reductase AKR2E4 OS=Bombyx mori OX=7091 GN=akr2e PE=1 SV=1	aldo-keto reductase AKR2E4-like [Spodoptera litura]
TRINITY_DN29108_c0_g1	4755.2	63.0333	-6.23881	1.36e-05	0.00121892	down	--	--	Molecular Function: structural constituent of cuticle (GO:0042302);;	K06236|0.0|haw:110376234|K06236 COL1A; collagen, type I, alpha	--	--	Insect cuticle protein	Pupal cuticle protein 36 OS=Manduca sexta OX=7130 GN=PCP36 PE=1 SV=1	collagen alpha-1(I) chain-like [Spodoptera litura]
TRINITY_DN31360_c1_g1	4074.86	368.51	-3.46693	0.000548798	0.0193569	down	[GEPR]	--	Biological Process: sphingosine-1-phosphate signaling pathway (GO:0003376);; Cellular Component: lysosomal membrane (GO:0005765);; Biological Process: endocytosis (GO:0006897);; Biological Process: lysosome organization (GO:0007040);; Biological Process: peripheral nervous system development (GO:0007422);; Biological Process: courtship behavior (GO:0007619);; Biological Process: endosome to lysos…	--|0.0|tnl:113502819|hypothetical protein	[G]	Carbohydrate transport and metabolism	Major Facilitator Superfamily;; Sugar (and other) transporter	Protein spinster OS=Drosophila melanogaster OX=7227 GN=spin PE=1 SV=1	uncharacterized protein LOC111360364 [Spodoptera litura]
TRINITY_DN26393_c2_g1	0	13.2088	6.00401	0.00142302	0.0382916	up	--	--	Cellular Component: extracellular region (GO:0005576);;	--|3e-08|haw:110374170|hypothetical protein	--	--	--	Fibroin light chain OS=Galleria mellonella OX=7137 GN=FIBL PE=1 SV=1	fibroin light chain-like [Spodoptera litura]
TRINITY_DN27858_c3_g3	22.3723	163.042	2.87457	2.06e-05	0.00166878	up	--	--	--	--|1e-29|haw:110383860|hypothetical protein	--	--	--	--	hypothetical protein B5V51_11380 [Heliothis virescens]
TRINITY_DN27974_c0_g1	6483.26	55.1898	-6.87747	1.34e-08	4.04e-06	down	--	--	--	--|5e-51|haw:110370740|hypothetical protein	--	--	--	--	uncharacterized protein LOC111348639 [Spodoptera litura]
TRINITY_DN22245_c0_g1	33.726	115.379	1.77128	0.000142463	0.00731524	up	--	--	Molecular Function: monooxygenase activity (GO:0004497);; Molecular Function: iron ion binding (GO:0005506);; Cellular Component: endoplasmic reticulum membrane (GO:0005789);; Molecular Function: oxidoreductase activity, acting on paired donors, with incorporation or reduction of molecular oxygen (GO:0016705);; Biological Process: sensory perception of pain (GO:0019233);; Molecular Function: heme…	K15001|3e-84|haw:110371802|K15001 CYP4; cytochrome P450 family 4 [EC:1.14.-.-]	[QI]	--	Cytochrome P450	Cytochrome P450 4g15 OS=Drosophila melanogaster OX=7227 GN=Cyp4g15 PE=2 SV=1	cytochrome P450, partial [Spodoptera litura]
TRINITY_DN19420_c0_g1	618.009	161.68	-1.93415	7.8e-05	0.00475762	down	--	--	--	K04659|1e-18|tnl:113502927|K04659 THBS2S; thrombospondin 2/3/4/5	--	--	--	--	cartilage oligomeric matrix protein [Spodoptera litura]
TRINITY_DN25897_c0_g1	567.589	140.682	-2.0126	5.18e-07	8.43e-05	down	--	--	--	K00079|0.0|haw:110374859|K00079 CBR1; carbonyl reductase 1 [EC:1.1.1.184 1.1.1.189 1.1.1.197]	[Q]	Secondary metabolites biosynthesis, transport and catabolism	short chain dehydrogenase;; Enoyl-(Acyl carrier protein) reductase	--	uncharacterized protein LOC111351692 [Spodoptera litura]
TRINITY_DN16580_c0_g1	473.224	40.5491	-3.54787	0.000241983	0.0107488	down	--	--	Molecular Function: extracellular matrix structural constituent (GO:0005201);; Molecular Function: calcium ion binding (GO:0005509);; Cellular Component: basement membrane (GO:0005604);; Cellular Component: basal lamina (GO:0005605);; Biological Process: multicellular organism development (GO:0007275);; Biological Process: extracellular matrix organization (GO:0030198);; Biological Process: posit…	K23342|0.0|tnl:113503284|K23342 FBN2_3; fibrillin 2/3	[T]	Signal transduction mechanisms	Calcium-binding EGF domain;; Complement Clr-like EGF-like;; EGF domain;; Coagulation Factor Xa inhibitory site;; EGF-like domain;; Human growth factor-like EGF;; Pvs28 EGF domain	Fibulin-1 OS=Caenorhabditis elegans OX=6239 GN=fbl-1 PE=1 SV=3	fibrillin-1-like isoform X2 [Spodoptera litura]
TRINITY_DN26402_c1_g1	1492.02	178.306	-3.06588	1.51e-08	4.48e-06	down	[G]	Carbohydrate transport and metabolism	Molecular Function: phosphogluconate dehydrogenase (decarboxylating) activity (GO:0004616);; Biological Process: pentose-phosphate shunt (GO:0006098);; Biological Process: regulation of glucose metabolic process (GO:0010906);; Biological Process: D-gluconate metabolic process (GO:0019521);;	K00033|0.0|haw:110382514|K00033 PGD; 6-phosphogluconate dehydrogenase [EC:1.1.1.44 1.1.1.343]	[G]	Carbohydrate transport and metabolism	6-phosphogluconate dehydrogenase, C-terminal domain;; NAD binding domain of 6-phosphogluconate dehydrogenase;; 6-phosphogluconate dehydrogenase, C-terminal domain	6-phosphogluconate dehydrogenase, decarboxylating OS=Drosophila melanogaster OX=7227 GN=Pgd PE=2 SV=1	6-phosphogluconate dehydrogenase, decarboxylating [Spodoptera litura]
TRINITY_DN24143_c1_g1	2797.59	795.667	-1.81363	9.95e-05	0.00564976	down	[G]	Carbohydrate transport and metabolism	Molecular Function: glyceraldehyde-3-phosphate dehydrogenase (NAD+) (phosphorylating) activity (GO:0004365);; Cellular Component: cytoplasm (GO:0005737);; Biological Process: glucose metabolic process (GO:0006006);; Biological Process: glycolytic process (GO:0006096);; Cellular Component: microtubule cytoskeleton (GO:0015630);; Molecular Function: NADP binding (GO:0050661);; Molecular Function: N…	K00134|4e-63|haw:110377691|K00134 GAPDH; glyceraldehyde 3-phosphate dehydrogenase [EC:1.2.1.12]	[G]	Carbohydrate transport and metabolism	Glyceraldehyde 3-phosphate dehydrogenase, C-terminal domain	Glyceraldehyde-3-phosphate dehydrogenase OS=Glossina morsitans morsitans OX=37546 GN=Gapdh PE=2 SV=1	glyceraldehyde-3-phosphate dehydrogenase [Spodoptera frugiperda]
TRINITY_DN21629_c2_g3	14.1798	95.766	2.75146	0.000859758	0.0267572	up	--	--	--	--	--	--	--	--	PREDICTED: phosphoglycerate kinase-like, partial [Biomphalaria glabrata]
TRINITY_DN25438_c2_g1	750.919	261.575	-1.52126	0.000315427	0.0130211	down	--	--	Cellular Component: lysosome (GO:0005764);; Cellular Component: early endosome (GO:0005769);; Cellular Component: Golgi apparatus (GO:0005794);; Cellular Component: integral component of membrane (GO:0016021);; Cellular Component: cytoplasmic vesicle (GO:0031410);; Biological Process: embryonic hemopoiesis (GO:0035162);; Biological Process: larval lymph gland hemopoiesis (GO:0035167);; Biological…	--|1e-84|haw:110379376|hypothetical protein	--	--	--	OCIA domain-containing protein 1 OS=Drosophila melanogaster OX=7227 GN=asrij PE=1 SV=1	OCIA domain-containing protein 1-like [Spodoptera litura]
TRINITY_DN28506_c0_g1	2836.17	10.4749	-8.08068	1.46e-08	4.36e-06	down	[GEPR]	--	Biological Process: neurotransmitter uptake (GO:0001504);; Molecular Function: neurotransmitter transporter activity (GO:0005326);; Cellular Component: plasma membrane (GO:0005886);; Biological Process: visual perception (GO:0007601);; Molecular Function: organic anion transmembrane transporter activity (GO:0008514);; Cellular Component: integral component of membrane (GO:0016021);; Cellular Comp…	--|0.0|haw:110381180|hypothetical protein	[R]	General function prediction only	Sugar (and other) transporter;; Major Facilitator Superfamily	Carcinine transporter OS=Drosophila melanogaster OX=7227 GN=CarT PE=2 SV=1	organic cation transporter protein-like [Spodoptera litura]
TRINITY_DN29174_c0_g1	119.135	3.09291	-5.26641	0.000188342	0.00901486	down	--	--	--	--	--	--	--	--	Uncharacterized protein APZ42_008836, partial [Daphnia magna]
TRINITY_DN20046_c0_g1	8.26799	349.907	5.39036	5.19e-08	1.25e-05	up	--	--	Cellular Component: extracellular region (GO:0005576);; Molecular Function: phosphatidylcholine 1-acylhydrolase activity (GO:0008970);; Biological Process: lipid catabolic process (GO:0016042);; Biological Process: hemolysis in other organism (GO:0044179);; Molecular Function: phosphatidylserine 1-acylhydrolase activity (GO:0052739);; Molecular Function: 1-acyl-2-lysophosphatidylserine acylhydrol…	--|1e-156|haw:110383799|hypothetical protein	--	--	Lipase	Phospholipase A1 2 (Fragment) OS=Polistes dominula OX=743375 PE=2 SV=1	pancreatic triacylglycerol lipase-like [Spodoptera litura]
TRINITY_DN28355_c1_g1	28.6499	356.815	3.63181	9.31e-07	0.000136569	up	--	--	Molecular Function: translation initiation factor activity (GO:0003743);; Cellular Component: cytoplasm (GO:0005737);; Biological Process: regulation of translational initiation (GO:0006446);; Cellular Component: eukaryotic translation initiation factor 4F complex (GO:0016281);;	--|1e-140|haw:110379495|hypothetical protein	--	--	--	Eukaryotic translation initiation factor 4 gamma OS=Dictyostelium discoideum OX=44689 GN=eif4g PE=3 SV=1	mucin-5AC isoform X2 [Spodoptera litura]
TRINITY_DN28015_c1_g1	7.76516	112.75	3.86563	0.000457564	0.0170525	up	--	--	--	K23222|0.0|tnl:113507364|K23222 HARBI1; nuclease HARBI1 [EC:3.1.-.-]	[L]	Replication, recombination and repair	DDE superfamily endonuclease;; Plant transposon protein;; Transposase DDE domain	--	putative nuclease HARBI1 [Helicoverpa armigera]
TRINITY_DN26713_c0_g1	33.3825	147.947	2.13954	2.01e-06	0.000258531	up	--	--	Biological Process: heart process (GO:0003015);; Molecular Function: structural constituent of cytoskeleton (GO:0005200);; Cellular Component: cytoskeleton (GO:0005856);; Cellular Component: plasma membrane (GO:0005886);; Cellular Component: septate junction (GO:0005918);; Cellular Component: smooth septate junction (GO:0005920);; Biological Process: protein targeting to membrane (GO:0006612);; B…	--|0.0|haw:110375158|hypothetical protein	[R]	General function prediction only	FERM central domain;; FERM N-terminal domain;; FERM C-terminal PH-like domain	Protein 4.1 homolog OS=Drosophila melanogaster OX=7227 GN=cora PE=1 SV=1	band 4.1-like protein 4 isoform X5 [Helicoverpa armigera]
TRINITY_DN23254_c0_g2	138.579	2.59375	-5.74558	1.02e-05	0.000961754	down	--	--	Cellular Component: plasma membrane (GO:0005886);; Molecular Function: carbohydrate binding (GO:0030246);;	K10091|1e-37|tnl:113507075|K10091 LGALS4; galectin-4	[W]	Extracellular structures	Galactoside-binding lectin	32 kDa beta-galactoside-binding lectin lec-3 OS=Caenorhabditis elegans OX=6239 GN=lec-3 PE=2 SV=3	galectin-9-like isoform X1 [Spodoptera litura]
TRINITY_DN30268_c0_g1	78.7664	542.447	2.77834	0.000183977	0.00884257	up	[L]	Replication, recombination and repair	Molecular Function: microfilament motor activity (GO:0000146);; Biological Process: mitotic cytokinesis (GO:0000281);; Cellular Component: uropod (GO:0001931);; Molecular Function: motor activity (GO:0003774);; Molecular Function: ATP binding (GO:0005524);; Cellular Component: actomyosin contractile ring (GO:0005826);; Cellular Component: cytosol (GO:0005829);; Cellular Component: cytoskeleton (G…	--|0.0|haw:110384508|hypothetical protein	--	--	--	Myosin-2 heavy chain OS=Dictyostelium discoideum OX=44689 GN=mhcA PE=1 SV=3	myosin-7 [Spodoptera litura]
TRINITY_DN26242_c5_g4	722.995	44.2251	-4.03432	7e-08	1.55e-05	down	--	--	Molecular Function: extracellular matrix structural constituent (GO:0005201);; Cellular Component: collagen type IV trimer (GO:0005587);; Biological Process: dorsal closure (GO:0007391);; Biological Process: oviduct morphogenesis (GO:0035848);; Biological Process: post-embryonic digestive tract morphogenesis (GO:0048621);; Biological Process: cardiac muscle cell development (GO:0055013);; Biologi…	K06237|8e-57|tnl:113501210|K06237 COL4A; collagen, type IV, alpha	[W]	Extracellular structures	Collagen triple helix repeat (20 copies)	Collagen alpha-1(IV) chain OS=Drosophila melanogaster OX=7227 GN=Col4a1 PE=1 SV=3	collagen alpha-1(IV) chain [Spodoptera litura]
TRINITY_DN31135_c0_g2	1.65562	30.0159	4.10561	9.45e-05	0.00549938	up	--	--	--	--|1e-51|haw:110379529|hypothetical protein	--	--	F-box-like;; F-box domain	--	F-box/LRR-repeat protein 7-like isoform X1 [Spodoptera litura]
TRINITY_DN30653_c2_g1	16.5005	96.9627	2.58417	0.000447687	0.0167687	up	--	--	--	--|1e-155|bmor:105841530|hypothetical protein	[D]	Cell cycle control, cell division, chromosome partitioning	--	--	PREDICTED: uncharacterized protein LOC107073570 [Polistes dominula]
TRINITY_DN26160_c0_g1	9.911	81.903	3.01618	0.000399346	0.015432	up	--	--	Biological Process: behavior (GO:0007610);; Molecular Function: protein phosphatase 2B binding (GO:0030346);;	--|2e-88|haw:110383427|hypothetical protein	[R]	General function prediction only	Arrestin (or S-antigen), N-terminal domain;; Arrestin (or S-antigen), C-terminal domain	Arrestin domain-containing protein 17 OS=Caenorhabditis elegans OX=6239 GN=arrd-17 PE=1 SV=2	arrestin domain-containing protein 2-like [Spodoptera litura]
TRINITY_DN23228_c1_g2	4.66387	59.6653	3.66336	0.00146366	0.0388927	up	--	--	--	--|3e-18|tnl:113508941|hypothetical protein	--	--	--	--	protein anon-37Cs-like isoform X3 [Spodoptera litura]
TRINITY_DN29272_c0_g1	113.381	767.3	2.75352	6.91e-09	2.2e-06	up	--	--	--	K07604|3e-51|sasa:106594684|K07604 KRT1; type I keratin, acidic	[TV]	--	--	Nuclear pore complex protein DDB_G0274915 OS=Dictyostelium discoideum OX=44689 GN=DDB_G0274915 PE=4 SV=2	nascent polypeptide-associated complex subunit alpha, muscle-specific form-like [Spodoptera litura]
TRINITY_DN23324_c0_g1	1456.33	380.647	-1.9351	1.87e-05	0.00153545	down	[J]	Translation, ribosomal structure and biogenesis	Molecular Function: structural constituent of ribosome (GO:0003735);; Cellular Component: mitochondrial large ribosomal subunit (GO:0005762);; Biological Process: translation (GO:0006412);; Biological Process: sensory perception of pain (GO:0019233);; Biological Process: mitochondrial translation (GO:0032543);;	K02884|0.0|haw:110376253|K02884 RP-L19; large subunit ribosomal protein L19	[J]	Translation, ribosomal structure and biogenesis	Ribosomal protein L19	39S ribosomal protein L19, mitochondrial OS=Drosophila melanogaster OX=7227 GN=mRpL19 PE=2 SV=1	39S ribosomal protein L19, mitochondrial-like [Spodoptera litura]
TRINITY_DN21316_c0_g1	33.9349	165.27	2.2781	2.66e-06	0.000326245	up	--	--	Molecular Function: insulin-like growth factor binding (GO:0005520);; Cellular Component: extracellular space (GO:0005615);; Biological Process: cell adhesion (GO:0007155);; Biological Process: determination of adult lifespan (GO:0008340);; Biological Process: negative regulation of lipid storage (GO:0010888);; Biological Process: negative regulation of insulin receptor signaling pathway (GO:0046…	--|1e-143|haw:110377979|hypothetical protein	[T]	Signal transduction mechanisms	Immunoglobulin domain;; Immunoglobulin I-set domain;; Immunoglobulin domain;; Immunoglobulin domain;; CD80-like C2-set immunoglobulin domain;; Immunoglobulin C1-set domain	Neural/ectodermal development factor IMP-L2 OS=Drosophila melanogaster OX=7227 GN=ImpL2 PE=1 SV=4	insulin-related peptide binding protein [Spodoptera frugiperda]
TRINITY_DN21987_c0_g1	1208.78	172.25	-2.8119	5.17e-05	0.00337711	down	[E]	Amino acid transport and metabolism	Molecular Function: aminoacylase activity (GO:0004046);; Cellular Component: cytoplasm (GO:0005737);; Biological Process: cellular amino acid metabolic process (GO:0006520);; Molecular Function: metallopeptidase activity (GO:0008237);; Molecular Function: metal ion binding (GO:0046872);;	K14677|0.0|haw:110376077|K14677 ACY1; aminoacylase [EC:3.5.1.14]	[E]	Amino acid transport and metabolism	Peptidase family M20/M25/M40;; Peptidase dimerisation domain;; Peptidase family M28	Aminoacylase-1 OS=Dictyostelium discoideum OX=44689 GN=acy1 PE=2 SV=1	aminoacylase-1-like [Helicoverpa armigera]
TRINITY_DN20515_c0_g1	3.71237	27.3286	2.89679	0.00091387	0.0279135	up	--	--	Molecular Function: ecdysone 20-monooxygenase activity (GO:0004501);; Molecular Function: iron ion binding (GO:0005506);; Cellular Component: mitochondrion (GO:0005739);; Biological Process: growth of a germarium-derived egg chamber (GO:0007295);; Biological Process: border follicle cell migration (GO:0007298);; Biological Process: dorsal closure (GO:0007391);; Biological Process: central nervous…	K10723|5e-07|bmor:100127102|K10723 SHD; ecdysone 20-monooxygenase [EC:1.14.99.22]	--	--	--	Ecdysone 20-monooxygenase OS=Drosophila melanogaster OX=7227 GN=shd PE=1 SV=3	Ecdysone 20-monooxygenase [Papilio machaon]
TRINITY_DN16907_c0_g1	0	14.7935	6.17054	0.000316159	0.0130211	up	[C]	Energy production and conversion	Molecular Function: xanthine dehydrogenase activity (GO:0004854);; Molecular Function: iron ion binding (GO:0005506);; Cellular Component: peroxisome (GO:0005777);; Cellular Component: cytosol (GO:0005829);; Molecular Function: electron transfer activity (GO:0009055);; Biological Process: xanthine catabolic process (GO:0009115);; Molecular Function: oxidoreductase activity, acting on CH-OH group …	K00106|1e-103|tnl:113503797|K00106 XDH; xanthine dehydrogenase/oxidase [EC:1.17.1.4 1.17.3.2]	[F]	Nucleotide transport and metabolism	[2Fe-2S] binding domain;; 2Fe-2S iron-sulfur cluster binding domain	Xanthine dehydrogenase OS=Dictyostelium discoideum OX=44689 GN=xdh PE=3 SV=1	xanthine dehydrogenase-like [Spodoptera litura]
TRINITY_DN19507_c0_g1	437.171	188.515	-1.21321	0.000806259	0.0256307	down	--	--	Molecular Function: arginine kinase activity (GO:0004054);; Molecular Function: ATP binding (GO:0005524);;	K00934|1e-54|tnl:113501645|K00934 E2.7.3.3; arginine kinase [EC:2.7.3.3]	[C]	Energy production and conversion	--	Arginine kinase OS=Plodia interpunctella OX=58824 GN=ARGK PE=1 SV=1	arginine kinase, partial [Mamestra configurata]
TRINITY_DN19280_c0_g1	356.843	130.752	-1.44695	0.00185877	0.0452519	down	[J]	Translation, ribosomal structure and biogenesis	Molecular Function: RNA binding (GO:0003723);; Molecular Function: glutamate-tRNA ligase activity (GO:0004818);; Molecular Function: ATP binding (GO:0005524);; Cellular Component: cytoplasm (GO:0005737);; Biological Process: glutamyl-tRNA aminoacylation (GO:0006424);;	K01885|0.0|haw:110376587|K01885 EARS; glutamyl-tRNA synthetase [EC:6.1.1.17]	[J]	Translation, ribosomal structure and biogenesis	tRNA synthetases class I (E and Q), catalytic domain	Probable glutamate--tRNA ligase, cytoplasmic OS=Dictyostelium discoideum OX=44689 GN=gluS PE=2 SV=1	probable glutamate--tRNA ligase, mitochondrial [Spodoptera litura]
TRINITY_DN22855_c2_g7	11.7583	81.3183	2.7773	5.55e-06	0.000583628	up	--	--	Molecular Function: serine-type endopeptidase inhibitor activity (GO:0004867);;	--|2e-33|haw:110372927|hypothetical protein	--	--	Kazal-type serine protease inhibitor domain;; Kazal-type serine protease inhibitor domain	Four-domain proteases inhibitor OS=Melithaea caledonica OX=156534 PE=1 SV=1	collagen alpha-1(IV) chain-like [Spodoptera litura]
TRINITY_DN21327_c2_g3	0.846268	14.7391	4.26375	0.00203751	0.0482938	up	--	--	--	--	--	--	--	--	hypothetical protein TRFO_10953 [Tritrichomonas foetus]
TRINITY_DN16832_c0_g1	0	11.0891	5.74984	0.000968279	0.0290955	up	--	--	--	K00106|2e-79|haw:110381341|K00106 XDH; xanthine dehydrogenase/oxidase [EC:1.17.1.4 1.17.3.2]	[F]	Nucleotide transport and metabolism	--	--	xanthine dehydrogenase 1-like [Spodoptera litura]
TRINITY_DN24488_c0_g2	1701.82	558.334	-1.60748	3.43e-05	0.0024999	down	--	--	Cellular Component: mitochondrion (GO:0005739);; Cellular Component: mitochondrial outer membrane translocase complex (GO:0005742);; Biological Process: protein targeting to mitochondrion (GO:0006626);; Biological Process: ion transport (GO:0006811);; Molecular Function: protein transmembrane transporter activity (GO:0015266);; Molecular Function: porin activity (GO:0015288);; Molecular Function:…	K11518|0.0|haw:110372640|K11518 TOM40; mitochondrial import receptor subunit TOM40	[U]	Intracellular trafficking, secretion, and vesicular transport	Eukaryotic porin	Mitochondrial import receptor subunit TOM40 homolog 1 OS=Drosophila melanogaster OX=7227 GN=Tom40 PE=2 SV=2	mitochondrial import receptor subunit TOM40 homolog 1-like [Spodoptera litura]
TRINITY_DN23073_c3_g1	39.9433	714.469	4.15889	5.19e-06	0.000550715	up	--	--	Biological Process: steroid metabolic process (GO:0008202);; Molecular Function: oxidoreductase activity (GO:0016491);;	K00011|5e-14|haw:110381989|K00011 AKR1B; aldehyde reductase [EC:1.1.1.21]	[R]	General function prediction only	--	Aldo-keto reductase AKR2E4 OS=Bombyx mori OX=7091 GN=akr2e PE=1 SV=1	aldo-keto reductase AKR2E4-like [Spodoptera litura]
TRINITY_DN29959_c1_g1	207.068	3.16068	-6.03883	1.63e-06	0.000217483	down	--	--	--	--	--	--	--	--	hypothetical protein TTRE_0000953901 [Trichuris trichiura]
TRINITY_DN19863_c3_g1	875.22	74.242	-3.55831	0.00209092	0.0492448	down	--	--	--	--|1e-96|tnl:113496960|hypothetical protein	--	--	--	--	uncharacterized protein LOC111359169 [Spodoptera litura]
TRINITY_DN20897_c0_g2	0.364207	28.6147	6.16329	9.08e-05	0.00535992	up	[G]	Carbohydrate transport and metabolism	Molecular Function: triose-phosphate isomerase activity (GO:0004807);; Biological Process: gluconeogenesis (GO:0006094);; Biological Process: glycolytic process (GO:0006096);; Biological Process: pentose-phosphate shunt (GO:0006098);;	K01803|4e-22|haw:110377797|K01803 TPI; triosephosphate isomerase (TIM) [EC:5.3.1.1]	[G]	Carbohydrate transport and metabolism	--	Triosephosphate isomerase OS=Bombyx mori OX=7091 GN=Tpi PE=1 SV=2	triosephosphate isomerase [Spodoptera litura]
TRINITY_DN30320_c0_g1	564.638	21.3215	-4.72504	8.82e-05	0.00525583	down	[P]	Inorganic ion transport and metabolism	Cellular Component: integral component of plasma membrane (GO:0005887);; Molecular Function: ammonium transmembrane transporter activity (GO:0008519);; Biological Process: organic cation transport (GO:0015695);; Biological Process: ammonium transmembrane transport (GO:0072488);;	K03320|0.0|haw:110373756|K03320 amt; ammonium transporter, Amt family	[P]	Inorganic ion transport and metabolism	Ammonium Transporter Family	Putative ammonium transporter 3 OS=Caenorhabditis elegans OX=6239 GN=amt-3 PE=3 SV=2	putative ammonium transporter 2 [Spodoptera litura]
TRINITY_DN31273_c1_g1	16.9138	140.554	3.04295	1.14e-06	0.000163749	up	--	--	--	--|4e-45|haw:110378395|hypothetical protein	[L]	Replication, recombination and repair	--	--	three-prime repair exonuclease 1-like [Spodoptera litura]
TRINITY_DN28299_c2_g2	242.033	78.7959	-1.61652	0.00107895	0.0314948	down	--	--	--	K02906|4e-37|haw:110373071|K02906 RP-L3; large subunit ribosomal protein L3	--	--	--	--	39S ribosomal protein L3, mitochondrial [Spodoptera litura]
TRINITY_DN23128_c0_g1	3077.41	568.639	-2.43569	3.05e-06	0.000356707	down	[O]	Posttranslational modification, protein turnover, chaperones	Molecular Function: ATP binding (GO:0005524);; Cellular Component: mitochondrion (GO:0005739);; Cellular Component: mitochondrial inner membrane (GO:0005743);; Cellular Component: mitochondrial matrix (GO:0005759);; Cellular Component: lipid droplet (GO:0005811);; Cellular Component: cytosol (GO:0005829);; Cellular Component: microtubule associated complex (GO:0005875);; Biological Process: 'de n…	K04077|9e-55|tnl:113503680|K04077 groEL; chaperonin GroEL	[O]	Posttranslational modification, protein turnover, chaperones	TCP-1/cpn60 chaperonin family	Heat shock protein 60A OS=Drosophila melanogaster OX=7227 GN=Hsp60A PE=1 SV=3	60 kDa heat shock protein, mitochondrial-like [Spodoptera litura]
TRINITY_DN29582_c1_g1	644.615	129.425	-2.31698	0.000177145	0.0085759	down	--	--	--	--|8e-99|haw:110374543|hypothetical protein	[TV]	--	--	--	uncharacterized protein LOC111349142 [Spodoptera litura]
TRINITY_DN31864_c2_g2	26.7104	535.595	4.33526	7.68e-07	0.000116641	up	--	--	--	--|1e-18|haw:110376664|hypothetical protein	--	--	--	--	pancreatic triacylglycerol lipase-like [Spodoptera litura]
TRINITY_DN31138_c0_g2	1418.6	346.203	-2.03441	4.05e-05	0.00284088	down	--	--	Cellular Component: extracellular space (GO:0005615);; Molecular Function: growth factor activity (GO:0008083);; Biological Process: regulation of synaptic transmission, dopaminergic (GO:0032225);; Biological Process: hemocyte migration (GO:0035099);; Biological Process: positive regulation of cell division (GO:0051781);;	--|3e-24|tnl:113508346|hypothetical protein	--	--	Paralytic/GBP/PSP peptide	Growth-blocking peptide, long form OS=Mythimna separata OX=271217 PE=1 SV=2	growth-blocking peptide, partial [Spodoptera litura]
TRINITY_DN24849_c0_g1	2229.59	240.385	-3.21393	8.51e-05	0.00511543	down	--	--	Molecular Function: extracellular matrix structural constituent (GO:0005201);; Cellular Component: extracellular matrix (GO:0031012);; Biological Process: cellular response to ecdysone (GO:0071390);;	--|0.0|tnl:113500063|hypothetical protein	--	--	--	Salivary glue protein Sgs-3 OS=Drosophila melanogaster OX=7227 GN=Sgs3 PE=2 SV=1	mucin-2-like [Spodoptera litura]
TRINITY_DN24496_c1_g5	0.728413	31.3332	5.41113	0.000977382	0.0292209	up	--	--	--	--|7e-23|haw:110369879|hypothetical protein	--	--	Single domain von Willebrand factor type C	--	uncharacterized protein LOC111356683 [Spodoptera litura]
TRINITY_DN27030_c0_g2	187.332	1607.92	3.10368	1.74e-15	1.98e-12	up	--	--	Molecular Function: serine-type endopeptidase activity (GO:0004252);; Cellular Component: extracellular space (GO:0005615);; Biological Process: collagen catabolic process (GO:0030574);;	--|1e-159|haw:110376161|hypothetical protein	[E]	Amino acid transport and metabolism	Trypsin	Chymotrypsin BI OS=Litopenaeus vannamei OX=6689 PE=1 SV=1	chymotrypsin-like serine protease precursor [Spodoptera frugiperda]
TRINITY_DN19327_c7_g1	1469.21	414.758	-1.82424	4.54e-05	0.00305853	down	--	--	--	K17411|7e-75|tnl:113508101|K17411 MRPS33; small subunit ribosomal protein S33	[T]	Signal transduction mechanisms	Mitochondrial ribosomal subunit S27	--	28S ribosomal protein S33, mitochondrial [Spodoptera litura]
TRINITY_DN29179_c5_g1	47.3944	185.553	1.96218	0.00104314	0.0307218	up	--	--	Biological Process: defecation rhythm (GO:0035882);; Biological Process: dauer entry (GO:0043053);;	K10273|0.0|haw:110371403|K10273 FBXL7; F-box and leucine-rich repeat protein 7	[R]	General function prediction only	Leucine Rich repeat;; Leucine Rich repeats (2 copies);; F-box domain;; F-box-like;; Leucine Rich Repeat	Uncharacterized F-box/LRR-repeat protein C02F5.7 OS=Caenorhabditis elegans OX=6239 GN=C02F5.7 PE=4 SV=3	hypothetical protein B5V51_3655 [Heliothis virescens]
TRINITY_DN26492_c0_g1	959.336	185.886	-2.36806	7.69e-08	1.66e-05	down	[Z]	Cytoskeleton	Molecular Function: GTPase activity (GO:0003924);; Molecular Function: structural constituent of cytoskeleton (GO:0005200);; Molecular Function: GTP binding (GO:0005525);; Cellular Component: cytoplasm (GO:0005737);; Cellular Component: microtubule (GO:0005874);; Biological Process: microtubule-based process (GO:0007017);;	K07375|0.0|tnl:113491657|K07375 TUBB; tubulin beta	[Z]	Cytoskeleton	Tubulin/FtsZ family, GTPase domain;; Tubulin C-terminal domain;; Misato Segment II tubulin-like domain	Tubulin beta-1 chain OS=Manduca sexta OX=7130 PE=2 SV=1	tubulin beta chain-like [Spodoptera litura]
TRINITY_DN21303_c0_g1	52331.2	2377.16	-4.4604	9.3e-08	1.94e-05	down	--	--	Molecular Function: structural constituent of cuticle (GO:0042302);;	--|1e-50|bmor:110385135|hypothetical protein	--	--	Insect cuticle protein	Larval cuticle protein LCP-17 OS=Bombyx mori OX=7091 GN=LCP17 PE=2 SV=1	uncharacterized protein LOC110385135 [Bombyx mori]
TRINITY_DN29562_c0_g4	180.855	757.388	2.06654	0.00031687	0.0130211	up	[Q]	Secondary metabolites biosynthesis, transport and catabolism	Molecular Function: iron ion binding (GO:0005506);; Cellular Component: endoplasmic reticulum membrane (GO:0005789);; Molecular Function: heme binding (GO:0020037);; Cellular Component: organelle membrane (GO:0031090);; Molecular Function: aromatase activity (GO:0070330);;	K14999|0.0|haw:110381029|K14999 CYP6; cytochrome P450 family 6 [EC:1.14.-.-]	[Q]	Secondary metabolites biosynthesis, transport and catabolism	Cytochrome P450	Cytochrome P450 6B5 (Fragment) OS=Papilio glaucus OX=45779 GN=CYP6B5 PE=2 SV=1	cytochrome P450 337B5 [Spodoptera frugiperda]
TRINITY_DN21637_c0_g1	3.13623	277.78	6.45387	0.00028839	0.0121889	up	--	--	--	--|2e-79|tnl:113496182|hypothetical protein	[E]	Amino acid transport and metabolism	Trypsin	Serine protease 2 OS=Drosophila melanogaster OX=7227 GN=Jon99Ciii PE=2 SV=1	chymotrypsin-like serine protease precursor [Spodoptera frugiperda]
TRINITY_DN21889_c1_g2	137.926	40.1143	-1.77854	0.00140461	0.0379361	down	--	--	--	K09504|1e-13|haw:110373266|K09504 DNAJA3; DnaJ homolog subfamily A member 3	--	--	--	--	uncharacterized protein LOC111363727 isoform X2 [Spodoptera litura]
TRINITY_DN24024_c0_g1	753.07	1886.96	1.32572	0.00173811	0.0433109	up	--	--	--	--|6e-33|pmac:106721209|hypothetical protein	[S]	Function unknown	Ribosome associated membrane protein RAMP4	--	PREDICTED: stress-associated endoplasmic reticulum protein 2 [Amyelois transitella]
TRINITY_DN14235_c0_g1	8801.22	2108.98	-2.06109	0.000278891	0.0118798	down	[G]	Carbohydrate transport and metabolism	Biological Process: polysaccharide catabolic process (GO:0000272);; Molecular Function: chitinase activity (GO:0004568);; Cellular Component: extracellular region (GO:0005576);; Biological Process: chitin catabolic process (GO:0006032);; Molecular Function: chitin binding (GO:0008061);;	K01183|1e-69|haw:110369951|K01183 E3.2.1.14; chitinase [EC:3.2.1.14]	[G]	Carbohydrate transport and metabolism	Glycosyl hydrolases family 18	Probable chitinase 10 OS=Drosophila melanogaster OX=7227 GN=Cht10 PE=2 SV=2	probable chitinase 10 [Spodoptera litura]
TRINITY_DN31557_c1_g3	221.79	0.324986	-9.50085	6.19e-07	9.71e-05	down	--	--	--	--|8e-23|haw:110376229|hypothetical protein	--	--	--	--	uncharacterized protein LOC111349432 [Spodoptera litura]
TRINITY_DN31924_c4_g1	10.8123	596.065	5.83709	5.32e-17	7.17e-14	up	[F]	Nucleotide transport and metabolism	Molecular Function: xanthine dehydrogenase activity (GO:0004854);; Molecular Function: xanthine oxidase activity (GO:0004855);; Molecular Function: iron ion binding (GO:0005506);; Cellular Component: peroxisome (GO:0005777);; Molecular Function: electron transfer activity (GO:0009055);; Biological Process: xanthine catabolic process (GO:0009115);; Molecular Function: oxidoreductase activity, acti…	K00106|0.0|haw:110381341|K00106 XDH; xanthine dehydrogenase/oxidase [EC:1.17.1.4 1.17.3.2]	[F]	Nucleotide transport and metabolism	Molybdopterin-binding domain of aldehyde dehydrogenase;; [2Fe-2S] binding domain;; Aldehyde oxidase and xanthine dehydrogenase, a/b hammerhead domain;; CO dehydrogenase flavoprotein C-terminal domain;; FAD binding domain in molybdopterin dehydrogenase;; 2Fe-2S iron-sulfur cluster binding domain	Xanthine dehydrogenase OS=Drosophila subobscura OX=7241 GN=Xdh PE=3 SV=1	xanthine dehydrogenase 1-like [Spodoptera litura]
TRINITY_DN26242_c5_g5	65884.9	3760.89	-4.13081	8.21e-14	6.95e-11	down	--	--	Molecular Function: extracellular matrix structural constituent (GO:0005201);; Cellular Component: collagen trimer (GO:0005581);; Cellular Component: basement membrane (GO:0005604);;	K06237|0.0|tnl:113501210|K06237 COL4A; collagen, type IV, alpha	[W]	Extracellular structures	Collagen triple helix repeat (20 copies)	Collagen alpha-2(IV) chain OS=Ascaris suum OX=6253 PE=2 SV=1	collagen alpha-1(IV) chain [Spodoptera litura]
TRINITY_DN24733_c0_g1	4.5794	64.7226	3.75726	3.71e-06	0.000422819	up	[Q]	Secondary metabolites biosynthesis, transport and catabolism	Molecular Function: iron ion binding (GO:0005506);; Cellular Component: endoplasmic reticulum membrane (GO:0005789);; Molecular Function: heme binding (GO:0020037);; Cellular Component: organelle membrane (GO:0031090);; Molecular Function: aromatase activity (GO:0070330);;	K07427|1e-111|pmac:106717371|K07427 CYP4V2; docosahexaenoic acid omega-hydroxylase [EC:1.14.14.79]	[QI]	--	Cytochrome P450	Cytochrome P450 4C1 OS=Blaberus discoidalis OX=6981 GN=CYP4C1 PE=2 SV=1	uncharacterized protein LOC111356994 [Spodoptera litura]
TRINITY_DN23696_c1_g2	13658.9	367.165	-5.21722	1.3e-05	0.00116785	down	--	--	Molecular Function: structural constituent of cuticle (GO:0042302);;	--|4e-52|haw:110377478|hypothetical protein	--	--	--	Cuticle protein 63 OS=Locusta migratoria OX=7004 PE=1 SV=1	shematrin-like protein 1 [Spodoptera litura]
TRINITY_DN23617_c0_g2	5113.77	1902.61	-1.42632	0.000714403	0.0232853	down	--	--	Molecular Function: calcium ion binding (GO:0005509);; Biological Process: protein transport (GO:0015031);; Cellular Component: AP-2 adaptor complex (GO:0030122);; Cellular Component: clathrin coat of coated pit (GO:0030132);;	K12483|0.0|haw:110378649|K12483 EHD1; EH domain-containing protein 1	[TU]	--	Dynamin family;; N-terminal EH-domain containing protein;; 50S ribosome-binding GTPase;; Cytoskeletal-regulatory complex EF hand;; EF hand	Epidermal growth factor receptor substrate 15 homolog OS=Dictyostelium discoideum OX=44689 GN=eps15 PE=1 SV=1	EH domain-containing protein 3 [Spodoptera litura]
TRINITY_DN27457_c2_g1	60.5508	715.86	3.56227	0.000150189	0.00758059	up	[GEPR]	--	Cellular Component: plasma membrane (GO:0005886);; Molecular Function: trehalose transmembrane transporter activity (GO:0015574);; Biological Process: trehalose transport (GO:0015771);; Cellular Component: integral component of membrane (GO:0016021);;	K08145|0.0|haw:110384398|K08145 SLC2A8; MFS transporter, SP family, solute carrier family 2 (facilitated glucose transporter), member 8	[R]	General function prediction only	Sugar (and other) transporter;; Major Facilitator Superfamily;; Sugar (and other) transporter	Facilitated trehalose transporter Tret1 OS=Bombyx mori OX=7091 GN=Tret1 PE=1 SV=1	facilitated trehalose transporter Tret1-like isoform X1 [Spodoptera litura]
TRINITY_DN21327_c3_g3	22.0769	309.886	3.81166	3.18e-05	0.00235463	up	[R]	General function prediction only	Biological Process: steroid metabolic process (GO:0008202);; Molecular Function: oxidoreductase activity (GO:0016491);;	K00011|6e-52|haw:110381989|K00011 AKR1B; aldehyde reductase [EC:1.1.1.21]	[R]	General function prediction only	Aldo/keto reductase family	Aldo-keto reductase AKR2E4 OS=Bombyx mori OX=7091 GN=akr2e PE=1 SV=1	aldo-keto reductase AKR2E4-like [Spodoptera litura]
TRINITY_DN26563_c0_g1	108.481	472.568	2.11939	0.00163012	0.041887	up	[Q]	Secondary metabolites biosynthesis, transport and catabolism	Molecular Function: monooxygenase activity (GO:0004497);; Molecular Function: iron ion binding (GO:0005506);; Cellular Component: endoplasmic reticulum membrane (GO:0005789);; Molecular Function: oxidoreductase activity (GO:0016491);; Molecular Function: oxidoreductase activity, acting on paired donors, with incorporation or reduction of molecular oxygen (GO:0016705);; Molecular Function: heme bi…	K14999|0.0|haw:110377241|K14999 CYP6; cytochrome P450 family 6 [EC:1.14.-.-]	[Q]	Secondary metabolites biosynthesis, transport and catabolism	Cytochrome P450	Probable cytochrome P450 6a13 OS=Drosophila melanogaster OX=7227 GN=Cyp6a13 PE=2 SV=1	cytochrome P450 6B6-like [Spodoptera litura]
TRINITY_DN28688_c0_g2	868.954	97.9799	-3.14819	1.79e-11	1.11e-08	down	--	--	Biological Process: embryonic axis specification (GO:0000578);; Molecular Function: G-protein alpha-subunit binding (GO:0001965);; Biological Process: heart process (GO:0003015);; Molecular Function: obsolete signal transducer activity, downstream of receptor (GO:0005057);; Molecular Function: GDP-dissociation inhibitor activity (GO:0005092);; Molecular Function: GTPase activator activity (GO:000…	--|0.0|haw:110379233|hypothetical protein	[S]	Function unknown	PH domain;; PDZ domain (Also known as DHR or GLGF);; Pleckstrin homology domain;; PDZ domain	Regulator of G-protein signaling loco OS=Drosophila melanogaster OX=7227 GN=loco PE=1 SV=2	PREDICTED: uncharacterized protein LOC106143377 [Amyelois transitella]
TRINITY_DN18114_c0_g1	234.552	837.018	1.83732	0.000133648	0.0069469	up	--	--	--	--	--	--	--	--	hypothetical protein B5V51_14253 [Heliothis virescens]
TRINITY_DN18882_c0_g1	33604.3	11.233	-11.5482	2.51e-21	7.44e-18	down	--	--	Molecular Function: structural constituent of cuticle (GO:0042302);;	--|6e-62|haw:110384203|hypothetical protein	--	--	Insect cuticle protein	Larval cuticle protein LCP-22 OS=Bombyx mori OX=7091 GN=LCP22 PE=2 SV=1	larval cuticle protein LCP-22-like [Spodoptera litura]
TRINITY_DN22777_c3_g2	4124.22	329.006	-3.64818	4.71e-05	0.00315136	down	--	--	Cellular Component: cytoplasm (GO:0005737);; Biological Process: cellular calcium ion homeostasis (GO:0006874);; Biological Process: regulation of pH (GO:0006885);; Biological Process: exocytosis (GO:0006887);; Biological Process: vesicle fusion (GO:0006906);; Biological Process: response to osmotic stress (GO:0006970);; Biological Process: hyperosmotic response (GO:0006972);; Biological Process:…	--|3e-56|tnl:113500925|hypothetical protein	--	--	--	Protein rtoA OS=Dictyostelium discoideum OX=44689 GN=rtoA PE=2 SV=2	pupal cuticle protein 36-like [Spodoptera litura]
TRINITY_DN22472_c2_g2	89.9804	22.9821	-1.96642	0.00200563	0.0476909	down	[G]	Carbohydrate transport and metabolism	Molecular Function: phosphoglycerate kinase activity (GO:0004618);; Molecular Function: ATP binding (GO:0005524);; Biological Process: glycolytic process (GO:0006096);; Biological Process: chemical synaptic transmission (GO:0007268);; Biological Process: myoblast fusion (GO:0007520);; Biological Process: somatic muscle development (GO:0007525);; Biological Process: phosphorylation (GO:0016310);; …	K00927|3e-76|haw:110374463|K00927 PGK; phosphoglycerate kinase [EC:2.7.2.3]	[G]	Carbohydrate transport and metabolism	Phosphoglycerate kinase;; Phosphoglycerate kinase;; Phosphoglycerate kinase	Phosphoglycerate kinase OS=Drosophila melanogaster OX=7227 GN=Pgk PE=2 SV=2	phosphoglycerate kinase [Spodoptera litura]
TRINITY_DN23362_c0_g4	4562.46	1181.17	-1.94958	0.00138913	0.0376552	down	[Q]	Secondary metabolites biosynthesis, transport and catabolism	Molecular Function: urate oxidase activity (GO:0004846);; Cellular Component: peroxisome (GO:0005777);; Biological Process: purine nucleobase metabolic process (GO:0006144);; Biological Process: urate catabolic process (GO:0019628);;	K00365|2e-92|haw:110371086|K00365 uaZ; urate oxidase [EC:1.7.3.3]	[Q]	Secondary metabolites biosynthesis, transport and catabolism	Uricase	Uricase (Fragment) OS=Drosophila subobscura OX=7241 GN=Uro PE=2 SV=1	uricase [Spodoptera litura]
TRINITY_DN20002_c0_g1	2946.34	834.171	-1.82064	0.00108295	0.0315494	down	--	--	--	K14944|3e-34|tnl:113504776|K14944 NOVA; RNA-binding protein Nova	[AR]	--	KH domain	--	RNA-binding protein Nova-2 isoform X4 [Spodoptera litura]
TRINITY_DN23414_c0_g1	1145.19	293.361	-1.96408	1.77e-06	0.000230749	down	--	--	Molecular Function: structural constituent of ribosome (GO:0003735);; Cellular Component: mitochondrial small ribosomal subunit (GO:0005763);;	K17410|0.0|haw:110372908|K17410 MRPS31; small subunit ribosomal protein S31	--	--	Mitochondrial 28S ribosomal protein S31	28S ribosomal protein S31, mitochondrial OS=Caenorhabditis elegans OX=6239 GN=mrps-31 PE=3 SV=2	28S ribosomal protein S31, mitochondrial [Spodoptera litura]
TRINITY_DN30798_c0_g1	313.07	2476.76	2.98553	0.00142767	0.0382916	up	--	--	--	--|5e-16|haw:110382140|hypothetical protein	--	--	--	--	uncharacterized protein LOC111350556 [Spodoptera litura]
TRINITY_DN21694_c1_g1	12.379	59.971	2.25766	0.0019689	0.047158	up	--	--	--	--	--	--	--	--	PREDICTED: uncharacterized protein LOC107064220 [Polistes dominula]
TRINITY_DN23554_c5_g3	6426.43	763.984	-3.07244	0.000596599	0.0206737	down	--	--	--	--|1e-12|tnl:113500966|hypothetical protein	[TV]	--	--	--	uncharacterized protein LOC111352680 [Spodoptera litura]
TRINITY_DN29457_c2_g1	2463.37	632.713	-1.96128	0.00125788	0.0351258	down	[GEPR]	--	--	K20840|0.0|haw:110370511|K20840 SLC46A3; MFS transporter, PCFT/HCP family, solute carrier family 46, member 3	[R]	General function prediction only	Major Facilitator Superfamily	--	solute carrier family 46 member 3-like [Spodoptera litura]
TRINITY_DN25780_c5_g1	266.419	106.672	-1.32234	0.00165289	0.0421807	down	--	--	--	K19363|4e-57|haw:110372864|K19363 LITAF; lipopolysaccharide-induced tumor necrosis factor-alpha factor	--	--	LITAF-like zinc ribbon domain	Cell death-inducing p53-target protein 1 homolog OS=Dictyostelium discoideum OX=44689 GN=litaf PE=3 SV=1	lipopolysaccharide-induced tumor necrosis factor-alpha factor homolog [Helicoverpa armigera]
TRINITY_DN18882_c0_g2	23932.2	2.05088	-13.5277	1.97e-31	1.46e-27	down	--	--	Molecular Function: structural constituent of cuticle (GO:0042302);;	--|5e-32|haw:110384203|hypothetical protein	--	--	--	Larval cuticle protein LCP-22 OS=Bombyx mori OX=7091 GN=LCP22 PE=2 SV=1	larval cuticle protein LCP-22-like [Spodoptera litura]
TRINITY_DN23557_c1_g2	968.921	9.09348	-6.74291	1.62e-05	0.00137198	down	--	--	Cellular Component: extracellular region (GO:0005576);; Biological Process: chitin metabolic process (GO:0006030);; Molecular Function: chitin binding (GO:0008061);;	--|7e-69|haw:110384686|hypothetical protein	--	--	Chitin binding Peritrophin-A domain	Peritrophin-44 OS=Lucilia cuprina OX=7375 PE=1 SV=1	peritrophin-44-like [Spodoptera litura]
TRINITY_DN19308_c0_g1	23.7658	146.399	2.64196	0.00187613	0.0455083	up	--	--	Cellular Component: extracellular region (GO:0005576);;	--|8e-28|pon:100433551|hypothetical protein	[WV]	--	--	Threonine-rich protein (Fragment) OS=Acropora millepora OX=45264 PE=1 SV=1	soluble scavenger receptor cysteine-rich domain-containing protein SSC5D-like [Spodoptera litura]
TRINITY_DN29702_c0_g1	845.675	247.133	-1.77426	4.04e-06	0.000451211	down	--	--	--	--|0.0|haw:110382126|hypothetical protein	[I]	Lipid transport and metabolism	Acyl-CoA dehydrogenase, C-terminal domain	--	acyl-CoA dehydrogenase family member 9, mitochondrial [Spodoptera litura]
TRINITY_DN24639_c1_g1	80.3517	2405.66	4.90865	2.32e-20	5.73e-17	up	--	--	Cellular Component: extracellular region (GO:0005576);; Biological Process: killing of cells of other organism (GO:0031640);; Biological Process: defense response to bacterium (GO:0042742);; Biological Process: innate immune response (GO:0045087);; Biological Process: defense response to fungus (GO:0050832);;	--	--	--	--	Spodomicin OS=Spodoptera littoralis OX=7109 PE=1 SV=1	diapausin A4 [Spodoptera exigua]
TRINITY_DN23361_c1_g1	216.622	4.28401	-5.63759	2.72e-08	7.14e-06	down	[Q]	Secondary metabolites biosynthesis, transport and catabolism	Molecular Function: iron ion binding (GO:0005506);; Cellular Component: endoplasmic reticulum membrane (GO:0005789);; Molecular Function: heme binding (GO:0020037);; Cellular Component: organelle membrane (GO:0031090);; Molecular Function: aromatase activity (GO:0070330);;	K07427|1e-140|haw:110380839|K07427 CYP4V2; docosahexaenoic acid omega-hydroxylase [EC:1.14.14.79]	[QI]	--	Cytochrome P450	Cytochrome P450 4C1 OS=Blaberus discoidalis OX=6981 GN=CYP4C1 PE=2 SV=1	cytochrome P450 4C1-like [Spodoptera litura]
TRINITY_DN25480_c0_g1	147.378	31.5526	-2.22375	1.43e-05	0.00124522	down	--	--	Molecular Function: DNA binding (GO:0003677);; Molecular Function: DNA-binding transcription factor activity (GO:0003700);; Cellular Component: nucleus (GO:0005634);; Biological Process: transcription, DNA-templated (GO:0006351);; Biological Process: regulation of transcription, DNA-templated (GO:0006355);; Biological Process: negative regulation of transcription, DNA-templated (GO:0045892);;	K09068|1e-176|haw:110383022|K09068 TAL; T-cell acute lymphocytic leukemia protein	[K]	Transcription	Helix-loop-helix DNA-binding domain	Protein Fer3 OS=Drosophila melanogaster OX=7227 GN=fer3 PE=2 SV=2	uncharacterized protein LOC111364711 isoform X1 [Spodoptera litura]
TRINITY_DN24654_c1_g2	452.271	1063.9	1.23493	0.0010963	0.0317509	up	[E]	Amino acid transport and metabolism	Molecular Function: 4-aminobutyrate transaminase activity (GO:0003867);; Cellular Component: mitochondrion (GO:0005739);; Biological Process: gamma-aminobutyric acid metabolic process (GO:0009448);; Molecular Function: pyridoxal phosphate binding (GO:0030170);; Cellular Component: 4-aminobutyrate transaminase complex (GO:0032144);; Molecular Function: protein homodimerization activity (GO:0042803…	K13524|0.0|haw:110369949|K13524 ABAT; 4-aminobutyrate aminotransferase / (S)-3-amino-2-methylpropionate transaminase [EC:2.6.1.19 2.6.1.22]	[E]	Amino acid transport and metabolism	Aminotransferase class-III	4-aminobutyrate aminotransferase OS=Dictyostelium discoideum OX=44689 GN=gabT PE=3 SV=1	4-aminobutyrate aminotransferase, mitochondrial-like [Spodoptera litura]
TRINITY_DN16327_c0_g1	351.984	902.381	1.35778	0.000863018	0.0268024	up	[R]	General function prediction only	Molecular Function: DNA binding (GO:0003677);; Cellular Component: nucleus (GO:0005634);; Biological Process: transcription, DNA-templated (GO:0006351);; Biological Process: regulation of transcription, DNA-templated (GO:0006355);; Molecular Function: metal ion binding (GO:0046872);;	K22534|0.0|haw:110381174|K22534 PRDM5; PR domain zinc finger protein 5	[R]	General function prediction only	Zinc finger, C2H2 type;; Zinc-finger double domain;; C2H2-type zinc finger;; Zinc-finger of C2H2 type;; Zinc-finger double-stranded RNA-binding;; C2H2-type zinc finger	Protein suppressor of hairy wing OS=Drosophila virilis OX=7244 GN=su(Hw) PE=2 SV=1	zinc finger protein 525-like [Spodoptera litura]
TRINITY_DN21493_c0_g2	25.4838	580.24	4.50797	0.00108657	0.0315926	up	--	--	Cellular Component: extracellular space (GO:0005615);; Molecular Function: metalloendopeptidase inhibitor activity (GO:0008191);; Biological Process: anatomical structure morphogenesis (GO:0009653);; Biological Process: extracellular matrix organization (GO:0030198);; Biological Process: wound healing (GO:0042060);;	--|2e-22|bmor:101735636|hypothetical protein	--	--	--	Inducible metalloproteinase inhibitor protein OS=Galleria mellonella OX=7137 GN=IMPI PE=1 SV=2	hypothetical protein B5V51_1719 [Heliothis virescens]
TRINITY_DN20184_c12_g1	412.326	176.948	-1.2199	0.000767589	0.0246929	down	--	--	Molecular Function: dicarboxylic acid transmembrane transporter activity (GO:0005310);; Cellular Component: mitochondrial inner membrane (GO:0005743);; Biological Process: dicarboxylic acid transport (GO:0006835);; Biological Process: mitochondrial transport (GO:0006839);; Cellular Component: integral component of membrane (GO:0016021);;	--|0.0|haw:110383988|hypothetical protein	[R]	General function prediction only	Mitochondrial carrier protein	Probable mitochondrial 2-oxodicarboxylate carrier OS=Dictyostelium discoideum OX=44689 GN=mcfT PE=3 SV=1	solute carrier family 25 member 51 [Spodoptera litura]
TRINITY_DN24831_c1_g1	3641.63	77.9713	-5.54583	6.63e-06	0.000670464	down	--	--	Molecular Function: peroxidase activity (GO:0004601);; Cellular Component: extracellular region (GO:0005576);; Biological Process: phagocytosis (GO:0006909);; Biological Process: response to oxidative stress (GO:0006979);; Biological Process: eggshell chorion assembly (GO:0007306);; Molecular Function: heme binding (GO:0020037);; Biological Process: neurogenesis (GO:0022008);; Cellular Component:…	K19511|0.0|tnl:113502461|K19511 PXDN; peroxidase [EC:1.11.1.7]	[R]	General function prediction only	Animal haem peroxidase	Peroxidase OS=Drosophila melanogaster OX=7227 GN=Pxd PE=2 SV=2	peroxidase-like [Spodoptera litura]
TRINITY_DN19686_c5_g4	0.364207	50.9737	6.99575	3.49e-06	0.000404031	up	--	--	--	--|1e-09|tnl:113505777|hypothetical protein	--	--	--	--	glucose dehydrogenase [FAD, quinone]-like [Spodoptera litura]
TRINITY_DN22330_c2_g1	69.6665	1720.91	4.627	3.86e-05	0.00275284	up	[G]	Carbohydrate transport and metabolism	--	K01053|1e-159|haw:110377194|K01053 E3.1.1.17; gluconolactonase [EC:3.1.1.17]	[PT]	--	SMP-30/Gluconolaconase/LRE-like region;; Two component regulator propeller	--	regucalcin-like [Spodoptera litura]
TRINITY_DN28109_c0_g1	2.95005	34.8883	3.67622	4.02e-05	0.00283426	up	[E]	Amino acid transport and metabolism	Molecular Function: cystathionine gamma-synthase activity (GO:0003962);; Molecular Function: cystathionine gamma-lyase activity (GO:0004123);; Cellular Component: endoplasmic reticulum (GO:0005783);; Biological Process: cysteine biosynthetic process via cystathionine (GO:0019343);; Biological Process: transsulfuration (GO:0019346);; Molecular Function: pyridoxal phosphate binding (GO:0030170);; M…	K01758|1e-174|haw:110377760|K01758 CTH; cystathionine gamma-lyase [EC:4.4.1.1]	[E]	Amino acid transport and metabolism	Cys/Met metabolism PLP-dependent enzyme;; Methionine gamma-lyase;; Aminotransferase class I and II;; Glycine cleavage system P-protein	Putative cystathionine gamma-lyase 2 OS=Caenorhabditis elegans OX=6239 GN=cth-2 PE=3 SV=1	putative cystathionine gamma-lyase 2 [Spodoptera litura]
TRINITY_DN29863_c0_g1	28.7344	190.06	2.72147	0.00196399	0.0470785	up	[G]	Carbohydrate transport and metabolism	Biological Process: polysaccharide catabolic process (GO:0000272);; Molecular Function: chitinase activity (GO:0004568);; Cellular Component: extracellular region (GO:0005576);; Biological Process: chitin catabolic process (GO:0006032);; Molecular Function: chitin binding (GO:0008061);;	K01183|0.0|tnl:113499363|K01183 E3.2.1.14; chitinase [EC:3.2.1.14]	[G]	Carbohydrate transport and metabolism	Glycosyl hydrolases family 18	Endochitinase OS=Manduca sexta OX=7130 PE=2 SV=1	endochitinase [Spodoptera littoralis]
TRINITY_DN29808_c0_g2	1657.59	292.31	-2.50316	1.48e-05	0.00127773	down	[G]	Carbohydrate transport and metabolism	Cellular Component: cytoplasm (GO:0005737);; Biological Process: glycogen catabolic process (GO:0005980);; Molecular Function: glycogen phosphorylase activity (GO:0008184);; Biological Process: determination of adult lifespan (GO:0008340);; Molecular Function: pyridoxal phosphate binding (GO:0030170);; Molecular Function: protein homodimerization activity (GO:0042803);; Cellular Component: protei…	K00688|1e-161|haw:110376152|K00688 PYG; glycogen phosphorylase [EC:2.4.1.1]	[G]	Carbohydrate transport and metabolism	Carbohydrate phosphorylase	Glycogen phosphorylase OS=Drosophila melanogaster OX=7227 GN=GlyP PE=2 SV=2	glycogen phosphorylase [Spodoptera exigua]
TRINITY_DN16423_c0_g1	6143.05	0.974958	-12.6375	0.000779457	0.0249662	down	--	--	Biological Process: cheating during chimeric sorocarp development (GO:0099139);;	--|0.0|haw:110371378|hypothetical protein	--	--	Domain of unknown function (DUF4779)	Uncharacterized protein DDB_G0290685 OS=Dictyostelium discoideum OX=44689 GN=DDB_G0290685 PE=2 SV=2	sarcoplasmic reticulum histidine-rich calcium-binding protein-like [Spodoptera litura]
TRINITY_DN25506_c0_g1	136.33	463.818	1.7628	0.000464994	0.017221	up	[P]	Inorganic ion transport and metabolism	Cellular Component: extracellular region (GO:0005576);;	--|2e-52|haw:110373321|hypothetical protein	--	--	--	Uncharacterized histidine-rich protein DDB_G0274557 OS=Dictyostelium discoideum OX=44689 GN=DDB_G0274557 PE=3 SV=1	histidine-rich glycoprotein-like [Spodoptera litura]
TRINITY_DN29827_c1_g1	5904.59	13.1559	-8.81403	2.23e-08	6.22e-06	down	--	--	Biological Process: fatty acid biosynthetic process (GO:0006633);; Cellular Component: integral component of endoplasmic reticulum membrane (GO:0030176);; Molecular Function: 3-oxo-arachidoyl-CoA synthase activity (GO:0102336);; Molecular Function: 3-oxo-cerotoyl-CoA synthase activity (GO:0102337);; Molecular Function: 3-oxo-lignoceronyl-CoA synthase activity (GO:0102338);;	--|2e-98|tnl:113498049|hypothetical protein	[I]	Lipid transport and metabolism	GNS1/SUR4 family;; GNS1/SUR4 family	Elongation of very long chain fatty acids protein AAEL008004 OS=Aedes aegypti OX=7159 GN=AAEL008004 PE=2 SV=2	elongation of very long chain fatty acids protein 7 [Bombyx mori]
TRINITY_DN23073_c2_g3	20.9474	265.01	3.65948	4.25e-06	0.000468381	up	[R]	General function prediction only	Biological Process: steroid metabolic process (GO:0008202);; Molecular Function: oxidoreductase activity (GO:0016491);;	K00011|6e-50|haw:110381989|K00011 AKR1B; aldehyde reductase [EC:1.1.1.21]	[R]	General function prediction only	Aldo/keto reductase family	Aldo-keto reductase AKR2E4 OS=Bombyx mori OX=7091 GN=akr2e PE=1 SV=1	aldo-keto reductase AKR2E4-like [Spodoptera litura]
TRINITY_DN24981_c0_g1	12.1589	44.5085	1.87449	0.00143924	0.0384047	up	--	--	Molecular Function: neuropeptide hormone activity (GO:0005184);; Cellular Component: extracellular region (GO:0005576);; Cellular Component: extracellular space (GO:0005615);; Biological Process: neuropeptide signaling pathway (GO:0007218);; Biological Process: positive regulation of cGMP-mediated signaling (GO:0010753);; Molecular Function: receptor ligand activity (GO:0048018);;	--|0.0|haw:110380239|hypothetical protein	--	--	--	Neuropeptide-like 1 OS=Drosophila melanogaster OX=7227 GN=Nplp1 PE=1 SV=2	uncharacterized protein LOC111353894 [Spodoptera litura]
TRINITY_DN32162_c7_g3	114.409	13.0488	-3.14222	0.000522114	0.0186376	down	--	--	Molecular Function: extracellular matrix structural constituent (GO:0005201);; Molecular Function: calcium ion binding (GO:0005509);; Cellular Component: basement membrane (GO:0005604);; Cellular Component: basal lamina (GO:0005605);; Biological Process: multicellular organism development (GO:0007275);; Biological Process: extracellular matrix organization (GO:0030198);; Biological Process: posit…	K23342|1e-103|haw:110377233|K23342 FBN2_3; fibrillin 2/3	[T]	Signal transduction mechanisms	Calcium-binding EGF domain;; TB domain	Fibulin-1 OS=Caenorhabditis elegans OX=6239 GN=fbl-1 PE=1 SV=3	hypothetical protein B5V51_361 [Heliothis virescens]
TRINITY_DN18304_c0_g1	29.3793	103.604	1.81512	0.00070008	0.022894	up	--	--	Molecular Function: G-protein coupled receptor activity (GO:0004930);; Biological Process: visual perception (GO:0007601);; Biological Process: phototransduction (GO:0007602);; Molecular Function: photoreceptor activity (GO:0009881);; Cellular Component: integral component of membrane (GO:0016021);; Biological Process: protein-chromophore linkage (GO:0018298);;	K04255|0.0|haw:110378494|K04255 OPN4; r-opsin	[R]	General function prediction only	7 transmembrane receptor (rhodopsin family);; Serpentine type 7TM GPCR chemoreceptor Srsx	Opsin-1 OS=Manduca sexta OX=7130 GN=OP1 PE=1 SV=2	opsin-1 [Helicoverpa armigera]
TRINITY_DN24762_c0_g1	3894.32	396.098	-3.29706	3.73e-09	1.3e-06	down	--	--	--	--|1e-21|haw:110369879|hypothetical protein	--	--	--	--	uncharacterized protein LOC110369879 [Helicoverpa armigera]
TRINITY_DN16756_c0_g1	6.01495	489.285	6.36364	7.48e-12	5.16e-09	up	--	--	--	--|1e-48|haw:110380228|hypothetical protein	--	--	--	--	uncharacterized protein LOC111353924 [Spodoptera litura]
TRINITY_DN17954_c0_g1	848.689	239.996	-1.82126	0.000363677	0.0145216	down	[J]	Translation, ribosomal structure and biogenesis	Molecular Function: structural constituent of ribosome (GO:0003735);; Cellular Component: mitochondrial small ribosomal subunit (GO:0005763);; Biological Process: translation (GO:0006412);;	K02954|2e-85|haw:110369624|K02954 RP-S14; small subunit ribosomal protein S14	[J]	Translation, ribosomal structure and biogenesis	Ribosomal protein S14p/S29e	Probable 40S ribosomal protein S14, mitochondrial OS=Caenorhabditis elegans OX=6239 GN=mrps-14 PE=3 SV=2	28S ribosomal protein S14, mitochondrial [Spodoptera litura]
TRINITY_DN26687_c0_g2	155.125	459.208	1.56607	0.00174805	0.0434126	up	--	--	Molecular Function: organic anion transmembrane transporter activity (GO:0008514);; Cellular Component: integral component of membrane (GO:0016021);;	--|2e-29|haw:110382471|hypothetical protein	[R]	General function prediction only	--	Putative transporter B0252.3 OS=Caenorhabditis elegans OX=6239 GN=B0252.3 PE=3 SV=3	solute carrier family 22 member 13-like [Spodoptera litura]
TRINITY_DN29225_c0_g1	6.70395	60.8929	3.12964	0.000224769	0.0102002	up	--	--	--	--|6e-80|tnl:113493783|hypothetical protein	--	--	--	--	uncharacterized protein LOC111355318 [Spodoptera litura]
TRINITY_DN32048_c1_g1	103.045	509.777	2.30238	0.000182052	0.00879906	up	--	--	Cellular Component: extracellular region (GO:0005576);;	K15720|0.0|haw:110377493|K15720 N4BP2; NEDD4-binding protein 2 [EC:3.-.-.-]	[L]	Replication, recombination and repair	AAA domain;; Domain of unknown function (DUF1771);; Smr domain;; CUE domain	Uncharacterized protein DDB_G0271670 OS=Dictyostelium discoideum OX=44689 GN=DDB_G0271670 PE=3 SV=1	uncharacterized protein LOC111357368 isoform X1 [Spodoptera litura]
TRINITY_DN18927_c0_g1	5210.31	0.271438	-14.0555	6.84e-15	7.24e-12	down	--	--	Molecular Function: structural constituent of cuticle (GO:0042302);;	--|2e-33|haw:110384203|hypothetical protein	--	--	Insect cuticle protein	Larval cuticle protein LCP-22 OS=Bombyx mori OX=7091 GN=LCP22 PE=2 SV=1	larval cuticle protein LCP-22-like [Spodoptera litura]
TRINITY_DN24903_c0_g2	2062.08	911.639	-1.1776	0.00182125	0.0446689	down	--	--	Molecular Function: high-affinity glutamate transmembrane transporter activity (GO:0005314);; Cellular Component: mitochondrial inner membrane (GO:0005743);; Biological Process: mitochondrial transport (GO:0006839);; Cellular Component: integral component of membrane (GO:0016021);;	K15107|1e-121|haw:110377200|K15107 SLC25A18_22; solute carrier family 25 (mitochondrial glutamate transporter), member 18/22	[C]	Energy production and conversion	Mitochondrial carrier protein;; Mitochondrial carrier protein	Mitochondrial substrate carrier family protein X OS=Dictyostelium discoideum OX=44689 GN=mcfX PE=3 SV=1	mitochondrial glutamate carrier 1-like [Spodoptera litura]
TRINITY_DN26133_c0_g1	41.3889	111.061	1.43023	0.00129247	0.0358321	up	--	--	Molecular Function: G-protein coupled receptor activity (GO:0004930);; Biological Process: visual perception (GO:0007601);; Biological Process: phototransduction (GO:0007602);; Molecular Function: photoreceptor activity (GO:0009881);; Cellular Component: integral component of membrane (GO:0016021);; Biological Process: protein-chromophore linkage (GO:0018298);;	K04255|0.0|haw:110370149|K04255 OPN4; r-opsin	[R]	General function prediction only	7 transmembrane receptor (rhodopsin family);; Serpentine type 7TM GPCR chemoreceptor Srsx	Opsin-2 OS=Manduca sexta OX=7130 GN=OP2 PE=2 SV=2	opsin-2 [Spodoptera litura]
TRINITY_DN19742_c0_g2	1023.94	354.682	-1.52911	0.000633104	0.0215357	down	--	--	Biological Process: regulation of oxidative phosphorylation (GO:0002082);; Cellular Component: mitochondrion (GO:0005739);; Biological Process: response to oxidative stress (GO:0006979);; Biological Process: spermatogenesis (GO:0007283);; Biological Process: gonad development (GO:0008406);; Biological Process: embryo development ending in birth or egg hatching (GO:0009792);; Cellular Component: i…	K17081|2e-28|tnl:113507055|K17081 PHB2; prohibitin 2	[O]	Posttranslational modification, protein turnover, chaperones	--	Mitochondrial prohibitin complex protein 2 OS=Caenorhabditis elegans OX=6239 GN=phb-2 PE=1 SV=2	prohibitin-2 [Spodoptera litura]
TRINITY_DN27185_c3_g1	1587.82	462.284	-1.77979	0.000278485	0.0118798	down	[O]	Posttranslational modification, protein turnover, chaperones	Cellular Component: mitochondrial inner membrane presequence translocase complex (GO:0005744);; Biological Process: protein targeting to mitochondrion (GO:0006626);; Molecular Function: protein transmembrane transporter activity (GO:0015266);; Molecular Function: P-P-bond-hydrolysis-driven protein transmembrane transporter activity (GO:0015450);; Cellular Component: integral component of membrane…	K17790|1e-127|haw:110371741|K17790 TIM22; mitochondrial import inner membrane translocase subunit TIM22	[U]	Intracellular trafficking, secretion, and vesicular transport	Tim17/Tim22/Tim23/Pmp24 family	Mitochondrial import inner membrane translocase subunit Tim22 OS=Drosophila melanogaster OX=7227 GN=Tim22 PE=2 SV=1	mitochondrial import inner membrane translocase subunit Tim22 [Spodoptera litura]
TRINITY_DN28626_c5_g2	257.842	908.924	1.81793	0.000373841	0.0147879	up	[P]	Inorganic ion transport and metabolism	Molecular Function: superoxide dismutase activity (GO:0004784);; Cellular Component: cytoplasm (GO:0005737);; Molecular Function: metal ion binding (GO:0046872);;	K04565|6e-16|haw:110372709|K04565 SOD1; superoxide dismutase, Cu-Zn family [EC:1.15.1.1]	[P]	Inorganic ion transport and metabolism	--	Superoxide dismutase [Cu-Zn] OS=Halocynthia roretzi OX=7729 PE=1 SV=2	superoxide dismutase [Cu-Zn]-like [Spodoptera litura]
TRINITY_DN25251_c0_g1	1368.91	328.483	-2.05837	2.31e-06	0.00029001	down	[J]	Translation, ribosomal structure and biogenesis	--	K15033|1e-113|tnl:113492242|K15033 ICT1; peptidyl-tRNA hydrolase ICT1 [EC:3.1.1.29]	[J]	Translation, ribosomal structure and biogenesis	RF-1 domain	--	peptidyl-tRNA hydrolase ICT1, mitochondrial [Spodoptera litura]
TRINITY_DN28041_c1_g1	8.62207	41.4669	2.25794	0.000229593	0.0103695	up	--	--	Cellular Component: extracellular region (GO:0005576);;	--|2e-16|tnl:113496914|hypothetical protein	--	--	--	Seroin OS=Galleria mellonella OX=7137 PE=1 SV=1	uncharacterized protein LOC111352882 [Spodoptera litura]
TRINITY_DN18687_c0_g1	318.632	76.0774	-2.06397	0.0018424	0.044997	down	--	--	Biological Process: protein transport (GO:0015031);; Cellular Component: integral component of membrane (GO:0016021);; Cellular Component: cytoplasmic vesicle membrane (GO:0030659);;	K14825|1e-111|haw:110373397|K14825 TMED5; p24 family protein gamma-2	[U]	Intracellular trafficking, secretion, and vesicular transport	emp24/gp25L/p24 family/GOLD	Transmembrane emp24 domain-containing protein A OS=Dictyostelium discoideum OX=44689 GN=empA PE=3 SV=1	transmembrane emp24 domain-containing protein 5-like [Spodoptera litura]
TRINITY_DN33155_c0_g1	0	11.6461	5.82129	0.000975396	0.0292012	up	[R]	General function prediction only	Cellular Component: mitochondrial intermembrane space (GO:0005758);; Biological Process: sulfur compound metabolic process (GO:0006790);; Molecular Function: sulfite oxidase activity (GO:0008482);; Molecular Function: heme binding (GO:0020037);; Molecular Function: molybdenum ion binding (GO:0030151);; Biological Process: nitrate assimilation (GO:0042128);;	K00387|4e-61|myd:102757965|K00387 SUOX; sulfite oxidase [EC:1.8.3.1]	[C]	Energy production and conversion	Oxidoreductase molybdopterin binding domain;; Mo-co oxidoreductase dimerisation domain	Probable sulfite oxidase, mitochondrial OS=Drosophila melanogaster OX=7227 GN=CG7280 PE=2 SV=1	hypothetical protein PROFUN_03316 [Planoprotostelium fungivorum]
TRINITY_DN31964_c4_g1	3637.73	429.55	-3.0825	4.66e-06	0.00050236	down	--	--	Molecular Function: extracellular matrix structural constituent (GO:0005201);; Molecular Function: calcium ion binding (GO:0005509);; Cellular Component: basement membrane (GO:0005604);; Cellular Component: basal lamina (GO:0005605);; Biological Process: multicellular organism development (GO:0007275);; Biological Process: extracellular matrix organization (GO:0030198);; Biological Process: posit…	K17307|0.0|tnl:113495750|K17307 FBLN1_2; fibulin 1/2	[T]	Signal transduction mechanisms	Calcium-binding EGF domain;; Complement Clr-like EGF-like;; Coagulation Factor Xa inhibitory site;; EGF domain;; EGF-like domain	Fibulin-1 OS=Caenorhabditis elegans OX=6239 GN=fbl-1 PE=1 SV=3	fibrillin-1-like [Spodoptera litura]
TRINITY_DN29911_c0_g2	2531.66	756.763	-1.74194	0.000463752	0.0172181	down	[P]	Inorganic ion transport and metabolism	Molecular Function: calcium-transporting ATPase activity (GO:0005388);; Molecular Function: calcium ion binding (GO:0005509);; Molecular Function: ATP binding (GO:0005524);; Cellular Component: plasma membrane (GO:0005886);; Cellular Component: integral component of plasma membrane (GO:0005887);; Biological Process: calcium ion transport (GO:0006816);; Molecular Function: calcium ion transmembran…	--|0.0|haw:110373901|hypothetical protein	[P]	Inorganic ion transport and metabolism	Cation transport ATPase (P-type);; haloacid dehalogenase-like hydrolase	Calcium-transporting ATPase PAT1 OS=Dictyostelium discoideum OX=44689 GN=patA PE=2 SV=2	plasma membrane calcium-transporting ATPase 2 isoform X5 [Spodoptera litura]
TRINITY_DN20231_c0_g1	1085.19	192.996	-2.49024	2.48e-08	6.75e-06	down	[O]	Posttranslational modification, protein turnover, chaperones	Molecular Function: ATP binding (GO:0005524);; Cellular Component: mitochondrion (GO:0005739);; Cellular Component: mitochondrial inner membrane (GO:0005743);; Cellular Component: mitochondrial matrix (GO:0005759);; Cellular Component: lipid droplet (GO:0005811);; Cellular Component: cytosol (GO:0005829);; Cellular Component: microtubule associated complex (GO:0005875);; Biological Process: 'de n…	K04077|1e-83|haw:110379863|K04077 groEL; chaperonin GroEL	[G]	Carbohydrate transport and metabolism	Molecular Function: ATP binding (GO:0005524);; Molecular Function: ATP-dependent NAD(P)H-hydrate dehydratase activity (GO:0047453);; Molecular Function: ADP-dependent NAD(P)H-hydrate dehydratase activity (GO:0052855);;	K17757|1e-146|haw:110374516|K17757 CARKD; ATP-dependent NAD(P)H-hydrate dehydratase [EC:4.2.1.93]	[G]	Carbohydrate transport and metabolism	Carbohydrate kinase;; Carbohydrate kinase	ATP-dependent (S)-NAD(P)H-hydrate dehydratase OS=Anopheles darlingi OX=43151 GN=AND_008360 PE=3 SV=1	ATP-dependent (S)-NAD(P)H-hydrate dehydratase isoform X1 [Spodoptera litura]
TRINITY_DN29571_c0_g1	1468.53	421.367	-1.80074	1.37e-06	0.000189346	down	--	--	Molecular Function: phosphoprotein phosphatase activity (GO:0004721);; Molecular Function: protein serine/threonine phosphatase activity (GO:0004722);; Molecular Function: protein tyrosine phosphatase activity (GO:0004725);; Cellular Component: mitochondrion (GO:0005739);; Cellular Component: mitochondrial inner membrane (GO:0005743);; Cellular Component: mitochondrial inner membrane presequence …	--|0.0|haw:110376898|hypothetical protein	[K]	Transcription	NLI interacting factor-like phosphatase	Mitochondrial import inner membrane translocase subunit TIM50-C OS=Drosophila melanogaster OX=7227 GN=ttm50 PE=2 SV=2	uncharacterized protein LOC111355016 [Spodoptera litura]
TRINITY_DN19609_c0_g1	12.0244	93.3226	2.93646	0.000366193	0.0145632	up	--	--	--	--|0.0|haw:110373854|hypothetical protein	[R]	General function prediction only	Fibrinogen beta and gamma chains, C-terminal globular domain	Fibrinogen-like protein A OS=Parastichopus parvimensis OX=1902835 PE=2 SV=1	fibrinogen C domain-containing protein 1-like [Spodoptera litura]
TRINITY_DN29201_c1_g1	493.086	178.827	-1.46171	0.00100587	0.0299216	down	--	--	--	--|0.0|haw:110376159|hypothetical protein	--	--	FAST kinase-like protein, subdomain 2;; FAST kinase-like protein, subdomain 1	--	protein TBRG4 [Spodoptera litura]
TRINITY_DN31932_c5_g2	95.3354	284.564	1.57739	0.000491034	0.0177997	up	--	--	Cellular Component: extracellular region (GO:0005576);;	K09041|0.0|tnl:113509041|K09041 NFE2N; nuclear factor erythroid 2, invertebrate	--	--	--	Uncharacterized protein DDB_G0271670 OS=Dictyostelium discoideum OX=44689 GN=DDB_G0271670 PE=3 SV=1	segmentation protein cap&apos;n&apos;collar-like isoform X2 [Spodoptera litura]
TRINITY_DN22486_c0_g1	4.23897	41.3643	3.23158	0.00178816	0.0441497	up	--	--	--	--|1e-180|haw:110372018|hypothetical protein	--	--	Protein of unknown function (DUF2475)	--	protein FAM166B-like [Spodoptera litura]
TRINITY_DN13679_c0_g1	780.013	246.808	-1.65923	0.000770757	0.0247578	down	--	--	--	K02874|2e-40|haw:110369813|K02874 RP-L14; large subunit ribosomal protein L14	[J]	Translation, ribosomal structure and biogenesis	--	--	39S ribosomal protein L14, mitochondrial [Spodoptera litura]
TRINITY_DN24557_c0_g1	38.6483	132.558	1.77771	0.000120321	0.00643478	up	--	--	Biological Process: signal transduction (GO:0007165);;	K13805|0.0|haw:110380976|K13805 ARR2; arrestin-2	[T]	Signal transduction mechanisms	Arrestin (or S-antigen), N-terminal domain;; Arrestin (or S-antigen), C-terminal domain	Arrestin homolog OS=Locusta migratoria OX=7004 PE=2 SV=1	arrestin homolog [Spodoptera litura]
TRINITY_DN29368_c0_g1	1066.51	133.165	-3.00096	2.31e-06	0.00029001	down	--	--	--	--|4e-62|haw:110377415|hypothetical protein	--	--	--	--	putative C1A cysteine protease precursor [Spodoptera frugiperda]
TRINITY_DN29750_c0_g1	43.5394	179.265	2.0338	0.000112589	0.00617738	up	[R]	General function prediction only	Molecular Function: cation channel activity (GO:0005261);; Molecular Function: calcium channel activity (GO:0005262);; Biological Process: cation transport (GO:0006812);; Biological Process: potassium ion transport (GO:0006813);; Biological Process: calcium ion transport (GO:0006816);; Biological Process: response to heat (GO:0009408);; Cellular Component: integral component of membrane (GO:00160…	--|0.0|haw:110379476|hypothetical protein	[R]	General function prediction only	Ankyrin repeats (3 copies);; Ankyrin repeats (many copies);; Ankyrin repeat;; Ankyrin repeats (many copies);; Ankyrin repeat;; Ion transport protein	Transient receptor potential channel pyrexia OS=Drosophila melanogaster OX=7227 GN=pyx PE=2 SV=2	uncharacterized protein LOC111351107 [Spodoptera litura]
TRINITY_DN17643_c0_g1	855.88	243.258	-1.81409	5.34e-05	0.00344987	down	--	--	Molecular Function: structural constituent of ribosome (GO:0003735);; Cellular Component: mitochondrial small ribosomal subunit (GO:0005763);; Biological Process: translation (GO:0006412);; Biological Process: mitochondrial translation (GO:0032543);;	K17403|1e-114|tnl:113496427|K17403 MRPS24; small subunit ribosomal protein S24	--	--	Mitochondrial ribosome subunit S24	28S ribosomal protein S24, mitochondrial OS=Drosophila melanogaster OX=7227 GN=mRpS24 PE=3 SV=1	28S ribosomal protein S24, mitochondrial [Spodoptera litura]
TRINITY_DN22954_c1_g1	0	13.1572	6.00103	0.000282313	0.0119834	up	--	--	--	--|7e-43|vem:105556932|hypothetical protein	--	--	--	--	hypothetical protein B5V51_8475 [Heliothis virescens]
TRINITY_DN30237_c2_g1	3891.32	1081.94	-1.84653	1.63e-05	0.00137856	down	[KR]	--	Molecular Function: glucosamine 6-phosphate N-acetyltransferase activity (GO:0004343);; Biological Process: UDP-N-acetylglucosamine biosynthetic process (GO:0006048);;	K00621|1e-135|haw:110378614|K00621 GNPNAT1; glucosamine-phosphate N-acetyltransferase [EC:2.3.1.4]	[M]	Cell wall/membrane/envelope biogenesis	Acetyltransferase (GNAT) family;; Acetyltransferase (GNAT) domain;; Acetyltransferase (GNAT) domain	Probable glucosamine 6-phosphate N-acetyltransferase OS=Drosophila melanogaster OX=7227 GN=CG1969 PE=2 SV=1	probable glucosamine 6-phosphate N-acetyltransferase [Spodoptera litura]
TRINITY_DN20654_c2_g2	70.0061	2.30265	-4.93047	9.32e-08	1.94e-05	down	--	--	--	--	--	--	--	--	larval cuticle protein LCP-30-like [Spodoptera litura]
TRINITY_DN31929_c3_g2	1.13966	21.5239	4.28155	0.000102777	0.00578914	up	--	--	Molecular Function: xanthine dehydrogenase activity (GO:0004854);; Molecular Function: iron ion binding (GO:0005506);; Cellular Component: peroxisome (GO:0005777);; Cellular Component: cytosol (GO:0005829);; Molecular Function: electron transfer activity (GO:0009055);; Biological Process: xanthine catabolic process (GO:0009115);; Molecular Function: oxidoreductase activity, acting on CH-OH group …	K00106|4e-40|haw:110372130|K00106 XDH; xanthine dehydrogenase/oxidase [EC:1.17.1.4 1.17.3.2]	[F]	Nucleotide transport and metabolism	--	Xanthine dehydrogenase OS=Dictyostelium discoideum OX=44689 GN=xdh PE=3 SV=1	indole-3-acetaldehyde oxidase-like [Spodoptera litura]
TRINITY_DN17275_c0_g1	1.50387	28.5822	4.27832	2.59e-05	0.00198738	up	[O]	Posttranslational modification, protein turnover, chaperones	Biological Process: multicellular organism development (GO:0007275);; Biological Process: response to heat (GO:0009408);; Biological Process: regulation of translational initiation by eIF2 alpha phosphorylation (GO:0010998);; Cellular Component: Z disc (GO:0030018);; Biological Process: protein refolding (GO:0042026);; Biological Process: sarcomere organization (GO:0045214);; Cellular Component: …	K09542|1e-122|haw:110380965|K09542 CRYAB; crystallin, alpha B	[O]	Posttranslational modification, protein turnover, chaperones	Hsp20/alpha crystallin family	Protein lethal(2)essential for life OS=Drosophila melanogaster OX=7227 GN=l(2)efl PE=1 SV=1	protein lethal(2)essential for life-like [Spodoptera litura]
TRINITY_DN19956_c1_g2	0	75.2598	8.51672	2.51e-08	6.75e-06	up	--	--	--	--|2e-13|haw:110372161|hypothetical protein	--	--	--	--	uncharacterized protein LOC111356575 [Spodoptera litura]
TRINITY_DN16426_c0_g1	582.269	154.194	-1.91616	0.000487539	0.0177673	down	--	--	--	K18179|2e-54|haw:110376486|K18179 COA6; cytochrome c oxidase assembly factor 6	[C]	Energy production and conversion	Cytochrome oxidase c subunit VIb	--	cytochrome c oxidase assembly factor 6 homolog [Spodoptera litura]
TRINITY_DN26272_c1_g2	725.938	20.0322	-5.18395	0.00119107	0.0338665	down	--	--	--	--|3e-06|haw:110377492|hypothetical protein	--	--	--	--	TSC22 domain family protein 1-like [Spodoptera litura]
TRINITY_DN17758_c0_g1	156.74	20.5662	-2.92728	7.16e-05	0.0044362	down	--	--	--	K04437|1e-52|haw:110375042|K04437 FLNA; filamin	--	--	--	--	filamin-A isoform X1 [Spodoptera litura]
TRINITY_DN21501_c3_g1	1116.42	241.22	-2.21095	2.32e-08	6.42e-06	down	[R]	General function prediction only	Cellular Component: cytoplasm (GO:0005737);; Biological Process: nucleotide metabolic process (GO:0009117);; Molecular Function: phosphatase activity (GO:0016791);; Biological Process: wound healing (GO:0042060);; Molecular Function: metal ion binding (GO:0046872);; Molecular Function: pseudouridine 5'-phosphatase activity (GO:1990738);;	K17623|1e-161|haw:110376592|K17623 HDHD1; pseudouridine 5'-phosphatase [EC:3.1.3.96]	[R]	General function prediction only	Haloacid dehalogenase-like hydrolase;; haloacid dehalogenase-like hydrolase;; HAD-hyrolase-like	Probable pseudouridine-5&apos;-phosphatase OS=Drosophila melanogaster OX=7227 GN=Gs1l PE=2 SV=2	probable pseudouridine-5&apos;-phosphatase [Spodoptera litura]
TRINITY_DN30680_c0_g1	100.84	14.3981	-2.81217	0.00169965	0.0429084	down	--	--	Cellular Component: integral component of plasma membrane (GO:0005887);; Biological Process: cell adhesion (GO:0007155);; Biological Process: cell-cell signaling (GO:0007267);; Biological Process: synapse assembly (GO:0007416);; Biological Process: synaptic target recognition (GO:0008039);; Cellular Component: cell junction (GO:0030054);; Biological Process: protein localization to synapse (GO:00…	--|0.0|haw:110381995|hypothetical protein	[R]	General function prediction only	Immunoglobulin domain;; Immunoglobulin I-set domain;; Immunoglobulin domain;; Immunoglobulin domain;; CD80-like C2-set immunoglobulin domain;; Immunoglobulin V-set domain;; Izumo-like Immunoglobulin domain;; Immunoglobulin C1-set domain	Synaptogenesis protein syg-2 OS=Caenorhabditis elegans OX=6239 GN=syg-2 PE=1 SV=1	hemicentin-2-like, partial [Spodoptera litura]
TRINITY_DN22747_c3_g1	2.30309	28.4809	3.64912	0.00172991	0.0432157	up	--	--	--	--|4e-25|amex:111191861|hypothetical protein	--	--	--	Histidine-rich glycoprotein OS=Plasmodium lophurae OX=5853 PE=4 SV=1	hypothetical protein AWC38_SpisGene21600 [Stylophora pistillata]
TRINITY_DN24945_c0_g1	2015.14	568.58	-1.82517	0.000312517	0.0129681	down	--	--	Molecular Function: carboxypeptidase activity (GO:0004180);; Cellular Component: extracellular space (GO:0005615);; Molecular Function: metallopeptidase activity (GO:0008237);; Molecular Function: peptidyl-dipeptidase activity (GO:0008241);; Cellular Component: membrane (GO:0016020);; Molecular Function: metal ion binding (GO:0046872);;	K01283|1e-112|haw:110374326|K01283 ACE; peptidyl-dipeptidase A [EC:3.4.15.1]	[E]	Amino acid transport and metabolism	Angiotensin-converting enzyme;; Angiotensin-converting enzyme	Angiotensin-converting enzyme OS=Haematobia irritans exigua OX=34678 GN=ACE PE=2 SV=1	angiotensin-converting enzyme-like isoform X2 [Spodoptera litura]
TRINITY_DN28351_c5_g1	409.688	67.1255	-2.612	0.000353631	0.014197	down	[Q]	Secondary metabolites biosynthesis, transport and catabolism	Molecular Function: iron ion binding (GO:0005506);; Cellular Component: endoplasmic reticulum membrane (GO:0005789);; Molecular Function: heme binding (GO:0020037);; Cellular Component: organelle membrane (GO:0031090);; Molecular Function: aromatase activity (GO:0070330);;	--|0.0|tnl:113498591|hypothetical protein	[QI]	--	Cytochrome P450	Cytochrome P450 4c21 OS=Blattella germanica OX=6973 GN=CYP4C21 PE=2 SV=1	cytochrome P450 4c21-like [Spodoptera litura]
TRINITY_DN26943_c0_g3	558.647	221.475	-1.33515	0.00170033	0.0429084	down	[O]	Posttranslational modification, protein turnover, chaperones	Molecular Function: glutathione transferase activity (GO:0004364);; Molecular Function: pyrimidodiazepine synthase activity (GO:0004734);; Cellular Component: cytoplasm (GO:0005737);; Biological Process: eye pigment biosynthetic process (GO:0006726);; Biological Process: pteridine biosynthetic process (GO:0006728);; Biological Process: glutathione metabolic process (GO:0006749);; Molecular Functi…	K00310|1e-155|haw:110382088|K00310 SE; pyrimidodiazepine synthase [EC:1.5.4.1]	[O]	Posttranslational modification, protein turnover, chaperones	Glutathione S-transferase, N-terminal domain;; Glutathione S-transferase, N-terminal domain;; Glutathione S-transferase, N-terminal domain;; Glutathione S-transferase, C-terminal domain	Pyrimidodiazepine synthase OS=Drosophila melanogaster OX=7227 GN=se PE=1 SV=1	pyrimidodiazepine synthase-like [Spodoptera litura]
TRINITY_DN25501_c0_g2	0.293391	67.952	7.40964	1.02e-06	0.000147251	up	--	--	Molecular Function: calcium channel activity (GO:0005262);; Cellular Component: cilium (GO:0005929);; Biological Process: mating behavior (GO:0007617);; Cellular Component: membrane (GO:0016020);; Cellular Component: integral component of membrane (GO:0016021);; Molecular Function: protein domain specific binding (GO:0019904);; Biological Process: response to hermaphrodite contact (GO:0034606);; …	--|1e-145|mjv:108384136|hypothetical protein	--	--	--	Location of vulva defective 1 OS=Caenorhabditis elegans OX=6239 GN=lov-1 PE=1 SV=4	uncharacterized protein LOC111359756 [Spodoptera litura]
TRINITY_DN26543_c0_g1	10.1998	64.7244	2.68718	0.00051061	0.0183002	up	--	--	Molecular Function: serine-type endopeptidase activity (GO:0004252);; Cellular Component: extracellular region (GO:0005576);; Biological Process: proteolysis (GO:0006508);; Biological Process: maternal specification of dorsal/ventral axis, oocyte, germ-line encoded (GO:0007311);; Biological Process: Toll signaling pathway (GO:0008063);; Molecular Function: peptidase activity (GO:0008233);; Molecu…	--|3e-94|haw:110372236|hypothetical protein	[E]	Amino acid transport and metabolism	Trypsin;; Trypsin	Serine protease snake OS=Drosophila melanogaster OX=7227 GN=snk PE=1 SV=2	serine protease snake-like [Spodoptera litura]
TRINITY_DN19166_c0_g2	5.27391	28.5956	2.41402	0.00161985	0.0418456	up	--	--	Cellular Component: cell surface (GO:0009986);;	--|7e-45|fcd:110841923|hypothetical protein	--	--	--	Circumsporozoite protein OS=Plasmodium knowlesi (strain nuri) OX=5852 PE=3 SV=1	proline-rich protein 2-like [Folsomia candida]
TRINITY_DN20239_c2_g4	0.728413	35.352	5.58957	2.78e-05	0.00211511	up	--	--	Cellular Component: extracellular region (GO:0005576);;	--|6e-20|haw:110369627|hypothetical protein	--	--	--	Salivary gland SP38-40.B protein OS=Chironomus tentans OX=7153 GN=SP38-40.B PE=2 SV=1	27 kDa primary mesenchyme-specific spicule protein-like [Helicoverpa armigera]
TRINITY_DN27674_c0_g1	2069.54	599.906	-1.78604	0.00124183	0.0347432	down	[J]	Translation, ribosomal structure and biogenesis	Biological Process: rRNA modification (GO:0000154);; Molecular Function: snoRNA binding (GO:0030515);; Cellular Component: box C/D snoRNP complex (GO:0031428);; Cellular Component: small-subunit processome (GO:0032040);;	K14564|1e-112|haw:110377059|K14564 NOP56; nucleolar protein 56	[AJ]	--	NOP5NT (NUC127) domain	Uncharacterized NOP5 family protein K07C5.4 OS=Caenorhabditis elegans OX=6239 GN=K07C5.4 PE=3 SV=1	nucleolar protein 56 [Spodoptera litura]
TRINITY_DN31735_c10_g1	1.0218	40.2283	5.2348	0.000258187	0.0112659	up	[Q]	Secondary metabolites biosynthesis, transport and catabolism	Molecular Function: monooxygenase activity (GO:0004497);; Molecular Function: iron ion binding (GO:0005506);; Cellular Component: endoplasmic reticulum membrane (GO:0005789);; Biological Process: ecdysone biosynthetic process (GO:0006697);; Molecular Function: oxidoreductase activity (GO:0016491);; Molecular Function: oxidoreductase activity, acting on paired donors, with incorporation or reducti…	K14999|7e-32|tnl:113506497|K14999 CYP6; cytochrome P450 family 6 [EC:1.14.-.-]	[Q]	Secondary metabolites biosynthesis, transport and catabolism	Cytochrome P450	Probable cytochrome P450 6t3 OS=Drosophila melanogaster OX=7227 GN=Cyp6t3 PE=3 SV=1	cytochrome p450 CYP6AE97 [Spodoptera exigua]
TRINITY_DN30386_c0_g2	29.274	448.342	3.94121	0.00108536	0.0315884	up	--	--	--	--	--	--	--	--	heterogeneous nuclear ribonucleoprotein A2 homolog 2-like [Spodoptera litura]
TRINITY_DN29236_c2_g1	159.795	974.776	2.6077	0.000205922	0.00969032	up	[GEPR]	--	Cellular Component: integral component of plasma membrane (GO:0005887);; Biological Process: apoptotic process (GO:0006915);; Molecular Function: organic anion transmembrane transporter activity (GO:0008514);; Cellular Component: integral component of membrane (GO:0016021);;	--|1e-149|haw:110378467|hypothetical protein	[R]	General function prediction only	Sugar (and other) transporter	Organic cation transporter protein OS=Drosophila melanogaster OX=7227 GN=Orct PE=1 SV=1	organic cation transporter protein-like [Spodoptera litura]
TRINITY_DN24881_c0_g1	288.108	1382.33	2.26385	4.67e-07	7.85e-05	up	[E]	Amino acid transport and metabolism	Biological Process: urea cycle (GO:0000050);; Biological Process: argininosuccinate metabolic process (GO:0000053);; Molecular Function: argininosuccinate synthase activity (GO:0004055);; Molecular Function: ATP binding (GO:0005524);; Cellular Component: cytoplasm (GO:0005737);; Biological Process: arginine biosynthetic process (GO:0006526);;	K01940|1e-149|haw:110374461|K01940 argG; argininosuccinate synthase [EC:6.3.4.5]	[E]	Amino acid transport and metabolism	Arginosuccinate synthase	Argininosuccinate synthase OS=Anopheles gambiae OX=7165 GN=AGAP003015 PE=3 SV=3	argininosuccinate synthase [Spodoptera litura]
TRINITY_DN22926_c0_g1	4383.55	1587.69	-1.46496	0.0014601	0.0388329	down	[J]	Translation, ribosomal structure and biogenesis	Biological Process: box H/ACA snoRNA 3'-end processing (GO:0000495);; Biological Process: pseudouridine synthesis (GO:0001522);; Molecular Function: RNA binding (GO:0003723);; Cellular Component: nucleolus (GO:0005730);; Biological Process: rRNA processing (GO:0006364);; Biological Process: germ cell development (GO:0007281);; Biological Process: cellular response to starvation (GO:0009267);; Mol…	K11131|0.0|haw:110382503|K11131 DKC1; H/ACA ribonucleoprotein complex subunit 4 [EC:5.4.99.-]	[J]	Translation, ribosomal structure and biogenesis	DKCLD (NUC011) domain;; TruB family pseudouridylate synthase (N terminal domain);; tRNA pseudouridylate synthase B C-terminal domain;; PUA domain	H/ACA ribonucleoprotein complex subunit 4 OS=Drosophila melanogaster OX=7227 GN=Nop60B PE=1 SV=1	H/ACA ribonucleoprotein complex subunit 4 [Spodoptera litura]
TRINITY_DN26388_c0_g1	699.499	159.257	-2.13546	0.00104778	0.0307363	down	[R]	General function prediction only	Molecular Function: transcriptional activator activity, RNA polymerase II proximal promoter sequence-specific DNA binding (GO:0001077);; Cellular Component: nucleus (GO:0005634);; Biological Process: adult somatic muscle development (GO:0007527);; Biological Process: positive regulation of transcription elongation from RNA polymerase II promoter (GO:0032968);; Molecular Function: sequence-specifi…	--|0.0|tnl:113500584|hypothetical protein	[R]	General function prediction only	Zinc finger, C2H2 type;; Zinc-finger double domain;; C2H2-type zinc finger;; Zinc-finger of C2H2 type	Chorion transcription factor Cf2 OS=Drosophila melanogaster OX=7227 GN=Cf2 PE=2 SV=3	zinc finger and SCAN domain-containing protein 10-like [Spodoptera litura]
TRINITY_DN23314_c0_g1	625.776	173.127	-1.85284	0.000367888	0.014611	down	[R]	General function prediction only	--	K18180|1e-171|haw:110382725|K18180 COA7; cytochrome c oxidase assembly factor 7	[S]	Function unknown	Sel1 repeat	Cytochrome c oxidase assembly factor 7 homolog OS=Drosophila melanogaster OX=7227 GN=CG13865 PE=2 SV=1	cytochrome c oxidase assembly factor 7 homolog [Spodoptera litura]
TRINITY_DN19227_c0_g2	778.044	272.315	-1.51418	0.00168778	0.0427397	down	--	--	--	--|1e-130|haw:110372663|hypothetical protein	--	--	--	--	uncharacterized protein LOC111357807 [Spodoptera litura]
TRINITY_DN28126_c1_g3	1.86807	19.1383	3.37208	0.00065476	0.02192	up	--	--	--	K15001|1e-08|tnl:113507377|K15001 CYP4; cytochrome P450 family 4 [EC:1.14.-.-]	--	--	--	--	cytochrome p450 CYP4L7 [Spodoptera exigua]
TRINITY_DN26801_c1_g1	269.349	1018.84	1.92167	0.000303383	0.0127498	up	[G]	Carbohydrate transport and metabolism	Biological Process: carbohydrate metabolic process (GO:0005975);; Molecular Function: thioglucosidase activity (GO:0019137);; Molecular Function: metal ion binding (GO:0046872);;	--|0.0|haw:110381159|hypothetical protein	[G]	Carbohydrate transport and metabolism	Glycosyl hydrolase family 1	Myrosinase 1 OS=Brevicoryne brassicae OX=69196 PE=1 SV=1	myrosinase 1-like isoform X2 [Spodoptera litura]
TRINITY_DN26231_c1_g1	1620.63	205.486	-2.97886	2.44e-05	0.00190869	down	--	--	Molecular Function: nucleotide binding (GO:0000166);; Molecular Function: RNA binding (GO:0003723);; Cellular Component: spliceosomal complex (GO:0005681);; Biological Process: mRNA processing (GO:0006397);; Biological Process: RNA splicing (GO:0008380);;	--|2e-83|haw:110370484|hypothetical protein	--	--	--	Splicing factor 3B subunit 4 OS=Caenorhabditis elegans OX=6239 GN=sap-49 PE=1 SV=2	proline-rich extensin-like protein EPR1 [Spodoptera litura]
TRINITY_DN24463_c0_g1	2850.25	908.547	-1.64913	0.000414907	0.0158811	down	[Z]	Cytoskeleton	Molecular Function: motor activity (GO:0003774);; Molecular Function: ATP binding (GO:0005524);; Cellular Component: polytene chromosome puff (GO:0005703);; Biological Process: muscle contraction (GO:0006936);; Biological Process: border follicle cell migration (GO:0007298);; Biological Process: epithelial cell migration, open tracheal system (GO:0007427);; Biological Process: muscle organ develo…	K17751|4e-48|dgr:Dgri_GH11564|K17751 MYH6_7; myosin heavy chain 6/7	[Z]	Cytoskeleton	Myosin head (motor domain)	Myosin heavy chain, muscle OS=Drosophila melanogaster OX=7227 GN=Mhc PE=1 SV=4	Myosin heavy chain, muscle [Papilio machaon]
TRINITY_DN23992_c1_g1	582.861	108.234	-2.42698	1.72e-05	0.00143964	down	--	--	--	--|1e-109|haw:110369817|hypothetical protein	--	--	Domain of unknown function (DUF4728)	--	uncharacterized protein LOC111356542 [Spodoptera litura]
TRINITY_DN19277_c2_g2	4404.53	483.153	-3.18847	0.000270815	0.0116793	down	--	--	Molecular Function: structural constituent of cuticle (GO:0042302);;	--|4e-59|tnl:113508875|hypothetical protein	--	--	Insect cuticle protein	Larval cuticle protein LCP-17 OS=Bombyx mori OX=7091 GN=LCP17 PE=2 SV=1	larval cuticle protein LCP-17-like [Spodoptera litura]
TRINITY_DN20530_c2_g3	3811.89	1482.57	-1.36229	0.000277858	0.0118793	down	[C]	Energy production and conversion	Cellular Component: mitochondrial respiratory chain complex I (GO:0005747);; Biological Process: mitochondrial electron transport, NADH to ubiquinone (GO:0006120);; Molecular Function: NADH dehydrogenase (ubiquinone) activity (GO:0008137);; Molecular Function: metal ion binding (GO:0046872);; Molecular Function: 2 iron, 2 sulfur cluster binding (GO:0051537);;	K03943|1e-171|haw:110375532|K03943 NDUFV2; NADH dehydrogenase (ubiquinone) flavoprotein 2 [EC:7.1.1.2 1.6.99.3]	[C]	Energy production and conversion	Thioredoxin-like [2Fe-2S] ferredoxin	Probable NADH dehydrogenase [ubiquinone] flavoprotein 2, mitochondrial OS=Caenorhabditis elegans OX=6239 GN=F53F4.10 PE=3 SV=1	NADH dehydrogenase [ubiquinone] flavoprotein 2, mitochondrial [Spodoptera litura]
TRINITY_DN22183_c0_g1	40.9065	132.382	1.68226	0.00146935	0.038974	up	--	--	Cellular Component: extracellular region (GO:0005576);; Biological Process: neuropeptide signaling pathway (GO:0007218);;	--|2e-95|dvi:Dvir_GJ22724|hypothetical protein	--	--	Low-density lipoprotein receptor domain class A	IDLSRF-like peptide OS=Camponotus floridanus OX=104421 GN=EAG_01737 PE=1 SV=1	LOW QUALITY PROTEIN: uncharacterized protein Dmoj_GI23103 [Drosophila mojavensis]
TRINITY_DN26393_c2_g3	0.293391	119.661	8.22439	5.94e-10	2.55e-07	up	--	--	--	--	--	--	--	--	fibroin light chain-like [Spodoptera litura]
TRINITY_DN21387_c0_g1	11.6799	423.944	5.20485	1.33e-14	1.36e-11	up	--	--	Cellular Component: extracellular region (GO:0005576);; Biological Process: killing of cells of other organism (GO:0031640);; Biological Process: defense response to bacterium (GO:0042742);; Biological Process: innate immune response (GO:0045087);; Biological Process: defense response to fungus (GO:0050832);;	--	--	--	--	Spodomicin OS=Spodoptera littoralis OX=7109 PE=1 SV=1	diapausin A4 [Spodoptera exigua]
TRINITY_DN21016_c1_g2	1746.21	513.654	-1.76554	0.00122063	0.0343445	down	--	--	--	--	--	--	--	--	hypothetical protein B5V51_14630 [Heliothis virescens]
TRINITY_DN17993_c0_g1	2763.74	581.126	-2.24929	3.08e-08	7.93e-06	down	--	--	--	K02935|9e-48|haw:110372042|K02935 RP-L7; large subunit ribosomal protein L7/L12	[J]	Translation, ribosomal structure and biogenesis	Ribosomal protein L7/L12 C-terminal domain	--	60S ribosomal protein L7/L12 precursor [Spodoptera frugiperda]
TRINITY_DN24965_c0_g1	104.287	679.849	2.69965	7.19e-07	0.000110309	up	--	--	--	--|3e-25|amex:103025403|hypothetical protein	--	--	--	Nuclear pore complex protein DDB_G0274915 OS=Dictyostelium discoideum OX=44689 GN=DDB_G0274915 PE=4 SV=2	nascent polypeptide-associated complex subunit alpha, muscle-specific form-like [Spodoptera litura]
TRINITY_DN28900_c1_g1	1089.12	310.674	-1.80914	9.48e-05	0.00550317	down	--	--	Cellular Component: integral component of membrane (GO:0016021);; Molecular Function: acetylcholine-gated cation-selective channel activity (GO:0022848);; Cellular Component: cell junction (GO:0030054);; Cellular Component: neuron projection (GO:0043005);; Cellular Component: postsynaptic membrane (GO:0045211);; Biological Process: inorganic cation transmembrane transport (GO:0098662);; Biologica…	--|0.0|tnl:113499282|hypothetical protein	[T]	Signal transduction mechanisms	Farnesoic acid 0-methyl transferase;; Neurotransmitter-gated ion-channel ligand binding domain	Acetylcholine receptor subunit beta-type acr-2 OS=Caenorhabditis elegans OX=6239 GN=acr-2 PE=1 SV=1	neuronal acetylcholine receptor subunit beta-3-like [Spodoptera litura]
TRINITY_DN32170_c4_g2	2380.66	851.762	-1.48255	0.000202466	0.00956725	down	[R]	General function prediction only	Molecular Function: nucleotide binding (GO:0000166);; Molecular Function: RNA binding (GO:0003723);; Biological Process: multicellular organism development (GO:0007275);; Biological Process: spermatogenesis (GO:0007283);; Biological Process: sex differentiation (GO:0007548);; Biological Process: cell differentiation (GO:0030154);;	K12897|0.0|haw:110382800|K12897 TRA2; transformer-2 protein	[R]	General function prediction only	RNA recognition motif. (a.k.a. RRM, RBD, or RNP domain)	Transformer-2 sex-determining protein OS=Drosophila virilis OX=7244 GN=tra2 PE=3 SV=1	transformer-2 protein homolog alpha isoform X7 [Helicoverpa armigera]
TRINITY_DN30540_c7_g1	2.22164	74.1643	5.21335	6.11e-07	9.63e-05	up	--	--	--	--	--	--	--	--	Facilitated trehalose transporter Tret1 [Papilio machaon]
TRINITY_DN26102_c1_g1	6315.32	2316.77	-1.44673	0.00197244	0.0471665	down	--	--	Molecular Function: serine-type endopeptidase activity (GO:0004252);; Cellular Component: extracellular region (GO:0005576);; Biological Process: digestion (GO:0007586);;	--|1e-115|haw:110379569|hypothetical protein	[E]	Amino acid transport and metabolism	Trypsin	Chymotrypsin-1 OS=Anopheles gambiae OX=7165 GN=CHYM1 PE=1 SV=3	chymotrypsin-1-like [Spodoptera litura]
TRINITY_DN22162_c2_g2	6345.19	693.232	-3.19433	0.0005027	0.0181235	down	[G]	Carbohydrate transport and metabolism	Molecular Function: dopachrome isomerase activity (GO:0004167);; Cellular Component: extracellular region (GO:0005576);; Biological Process: melanin biosynthetic process from tyrosine (GO:0006583);; Biological Process: indole-containing compound biosynthetic process (GO:0042435);; Biological Process: developmental pigmentation (GO:0048066);; Biological Process: cuticle pigmentation (GO:0048067);;	--|0.0|haw:110375291|hypothetical protein	--	--	Major royal jelly protein	L-dopachrome tautomerase yellow-f2 OS=Drosophila melanogaster OX=7227 GN=yellow-f2 PE=1 SV=2	L-dopachrome tautomerase yellow-f2-like [Spodoptera litura]
TRINITY_DN15593_c0_g1	0	40.7976	7.63413	1.09e-05	0.00101385	up	--	--	--	K00106|2e-57|tnl:113503935|K00106 XDH; xanthine dehydrogenase/oxidase [EC:1.17.1.4 1.17.3.2]	[F]	Nucleotide transport and metabolism	CO dehydrogenase flavoprotein C-terminal domain	--	xanthine dehydrogenase 1-like [Spodoptera litura]
TRINITY_DN31695_c0_g1	0	25.0049	6.9285	0.000481592	0.0176811	up	--	--	Molecular Function: monooxygenase activity (GO:0004497);; Molecular Function: iron ion binding (GO:0005506);; Cellular Component: endoplasmic reticulum membrane (GO:0005789);; Molecular Function: oxidoreductase activity, acting on paired donors, with incorporation or reduction of molecular oxygen (GO:0016705);; Molecular Function: heme binding (GO:0020037);; Cellular Component: organelle membrane…	K14999|3e-35|haw:110378486|K14999 CYP6; cytochrome P450 family 6 [EC:1.14.-.-]	[Q]	Secondary metabolites biosynthesis, transport and catabolism	--	Cytochrome P450 9e2 OS=Blattella germanica OX=6973 GN=CYP9E2 PE=2 SV=1	cytochrome P450 CYP9A52, partial [Spodoptera littoralis]
TRINITY_DN14227_c0_g1	49.7065	1.39107	-5.14814	7.95e-05	0.00481587	down	--	--	--	--|0.0|tnl:113501049|hypothetical protein	--	--	--	--	uncharacterized protein LOC111358888 isoform X2 [Spodoptera litura]
TRINITY_DN30980_c0_g1	2262.59	302.745	-2.90115	2.2e-05	0.00175307	down	[I]	Lipid transport and metabolism	Molecular Function: carboxylic ester hydrolase activity (GO:0052689);;	--|0.0|haw:110378933|hypothetical protein	[R]	General function prediction only	Carboxylesterase family;; Carboxylesterase family;; alpha/beta hydrolase fold	Esterase B1 OS=Culex pipiens OX=7175 GN=B1 PE=3 SV=1	esterase B1-like [Spodoptera litura]
TRINITY_DN28868_c3_g1	6137.71	287.241	-4.41732	3.12e-07	5.67e-05	down	[IQR]	--	Molecular Function: alcohol dehydrogenase (NAD) activity (GO:0004022);;	K00069|1e-160|haw:110378721|K00069 HPGD; 15-hydroxyprostaglandin dehydrogenase (NAD) [EC:1.1.1.141]	[IR]	--	short chain dehydrogenase;; Enoyl-(Acyl carrier protein) reductase;; KR domain;; NAD dependent epimerase/dehydratase family;; 3-beta hydroxysteroid dehydrogenase/isomerase family	Alcohol dehydrogenase 1 OS=Ceratitis cosyra OX=194917 GN=ADH1 PE=3 SV=1	15-hydroxyprostaglandin dehydrogenase [NAD(+)]-like [Spodoptera litura]
TRINITY_DN31526_c1_g1	320.55	124.76	-1.35972	0.00125969	0.0351433	down	[H]	Coenzyme transport and metabolism	Molecular Function: NAD+ synthase (glutamine-hydrolyzing) activity (GO:0003952);; Molecular Function: glutaminase activity (GO:0004359);; Molecular Function: ATP binding (GO:0005524);; Cellular Component: cytoplasm (GO:0005737);; Biological Process: NAD biosynthetic process (GO:0009435);;	K01950|0.0|tnl:113508446|K01950 E6.3.5.1; NAD+ synthase (glutamine-hydrolysing) [EC:6.3.5.1]	[HR]	--	NAD synthase	Probable glutamine-dependent NAD(+) synthetase OS=Drosophila melanogaster OX=7227 GN=CG9940 PE=1 SV=1	probable glutamine-dependent NAD(+) synthetase [Spodoptera litura]
TRINITY_DN28495_c0_g1	2.39717	24.7475	3.44228	0.000628052	0.0214624	up	--	--	--	K22128|2e-09|haw:110373109|K22128 PIEZO1_2; piezo-type mechanosensitive ion channel component 1/2	--	--	--	--	piezo-type mechanosensitive ion channel component isoform X5 [Spodoptera litura]
TRINITY_DN24429_c0_g1	0.482062	13.0079	5.02612	0.00178737	0.0441497	up	--	--	--	--|8e-18|haw:110372871|hypothetical protein	--	--	--	--	uncharacterized protein LOC111357551 [Spodoptera litura]
TRINITY_DN28260_c1_g5	1067.12	378.779	-1.49466	3.19e-05	0.00235463	down	[KR]	--	--	--|8e-92|haw:110377655|hypothetical protein	[E]	Amino acid transport and metabolism	Acetyltransferase (GNAT) family;; Acetyltransferase (GNAT) domain	--	diamine acetyltransferase 2 [Spodoptera litura]
TRINITY_DN23554_c5_g1	4007	609.495	-2.71677	0.000926784	0.0281917	down	--	--	--	--|8e-50|tnl:113500966|hypothetical protein	[TV]	--	--	--	uncharacterized protein LOC111352680 [Spodoptera litura]
TRINITY_DN14758_c0_g1	60.5147	0.271438	-7.62483	0.000599082	0.0207355	down	--	--	--	--|1e-120|tnl:113494798|hypothetical protein	--	--	--	--	uncharacterized protein LOC111359490 [Spodoptera litura]
TRINITY_DN27370_c2_g2	3043.63	362.299	-3.07012	3.89e-07	6.81e-05	down	--	--	--	--|6e-51|haw:110371528|hypothetical protein	--	--	--	--	putative C1A cysteine protease precursor [Spodoptera frugiperda]
TRINITY_DN18787_c0_g1	237.106	14.8344	-4.00352	0.0016304	0.041887	down	--	--	Molecular Function: structural constituent of cuticle (GO:0042302);;	--|9e-68|tnl:113493588|hypothetical protein	--	--	Insect cuticle protein	Larval/pupal rigid cuticle protein 66 OS=Hyalophora cecropia OX=7123 GN=CP66 PE=1 SV=1	larval/pupal rigid cuticle protein 66-like [Spodoptera litura]
TRINITY_DN20159_c0_g1	0	11.0141	5.74292	0.000764614	0.0246507	up	[LKJ]	--	Biological Process: regulation of alternative mRNA splicing, via spliceosome (GO:0000381);; Biological Process: instar larval development (GO:0002168);; Molecular Function: RNA helicase activity (GO:0003724);; Molecular Function: translation initiation factor activity (GO:0003743);; Molecular Function: ATP-dependent RNA helicase activity (GO:0004004);; Molecular Function: ATP binding (GO:0005524)…	K03257|0.0|nvi:100117124|K03257 EIF4A; translation initiation factor 4A	[J]	Translation, ribosomal structure and biogenesis	DEAD/DEAH box helicase;; Helicase conserved C-terminal domain;; Type III restriction enzyme, res subunit	Eukaryotic initiation factor 4A OS=Drosophila melanogaster OX=7227 GN=eIF4A PE=1 SV=3	eukaryotic translation initiation factor 4A isoform 1B [Capsaspora owczarzaki ATCC 30864]
TRINITY_DN21714_c0_g1	404.263	1428.36	1.82061	0.000164272	0.00809827	up	--	--	Molecular Function: phospholipase A2 activity (GO:0004623);; Cellular Component: extracellular region (GO:0005576);; Molecular Function: phosphatidylcholine 1-acylhydrolase activity (GO:0008970);; Biological Process: lipid catabolic process (GO:0016042);; Molecular Function: phosphatidylserine 1-acylhydrolase activity (GO:0052739);; Molecular Function: 1-acyl-2-lysophosphatidylserine acylhydrolas…	--|7e-45|haw:110383755|hypothetical protein	--	--	Lipase;; Lipase	Phospholipase A1 1 (Fragment) OS=Dolichovespula maculata OX=7441 PE=1 SV=1	lipase member H-like [Spodoptera litura]
TRINITY_DN21700_c5_g1	13.4842	55.1344	2.02051	0.000370149	0.0146811	up	--	--	--	--|1e-124|haw:110380324|hypothetical protein	[OT]	--	Ubiquitin family	--	NEDD8 ultimate buster 1-like isoform X2 [Spodoptera litura]
TRINITY_DN30059_c0_g2	284.61	938.41	1.71925	0.000742299	0.0240432	up	[R]	General function prediction only	Biological Process: lipid catabolic process (GO:0016042);; Molecular Function: hydrolase activity, acting on ester bonds (GO:0016788);;	K01052|0.0|haw:110376692|K01052 LIPA; lysosomal acid lipase/cholesteryl ester hydrolase [EC:3.1.1.13]	[I]	Lipid transport and metabolism	Partial alpha/beta-hydrolase lipase region;; alpha/beta hydrolase fold;; Serine aminopeptidase, S33	Lipase 3 OS=Drosophila melanogaster OX=7227 GN=Lip3 PE=2 SV=1	gastric triacylglycerol lipase-like [Spodoptera litura]
TRINITY_DN22356_c0_g1	23.5287	78.4601	1.73638	0.000771279	0.0247578	up	--	--	--	--|5e-41|tnl:113495545|hypothetical protein	[R]	General function prediction only	--	--	leucine-rich repeat-containing protein 58-like, partial [Spodoptera litura]
TRINITY_DN30459_c0_g2	2972.14	1119.3	-1.40888	0.000132748	0.00692441	down	--	--	Cellular Component: extracellular space (GO:0005615);;	--|0.0|haw:110372498|hypothetical protein	--	--	--	Spidroin-2 (Fragment) OS=Nephila clavipes OX=6915 PE=2 SV=1	proline-rich protein HaeIII subfamily 1-like [Spodoptera litura]
TRINITY_DN23674_c0_g1	164.585	1020.78	2.63216	0.00187698	0.0455083	up	--	--	Molecular Function: monooxygenase activity (GO:0004497);; Molecular Function: iron ion binding (GO:0005506);; Cellular Component: endoplasmic reticulum membrane (GO:0005789);; Molecular Function: oxidoreductase activity, acting on paired donors, with incorporation or reduction of molecular oxygen (GO:0016705);; Molecular Function: heme binding (GO:0020037);; Cellular Component: organelle membrane…	K14999|1e-123|haw:110378486|K14999 CYP6; cytochrome P450 family 6 [EC:1.14.-.-]	[Q]	Secondary metabolites biosynthesis, transport and catabolism	Cytochrome P450	Cytochrome P450 9e2 OS=Blattella germanica OX=6973 GN=CYP9E2 PE=2 SV=1	cytochrome P450 9e2-like [Spodoptera litura]
TRINITY_DN27040_c1_g2	803.818	265.119	-1.59967	0.000622213	0.0213929	down	[H]	Coenzyme transport and metabolism	Molecular Function: ferrochelatase activity (GO:0004325);; Cellular Component: mitochondrial inner membrane (GO:0005743);; Cellular Component: microtubule associated complex (GO:0005875);; Biological Process: protoporphyrinogen IX biosynthetic process (GO:0006782);; Molecular Function: metal ion binding (GO:0046872);; Molecular Function: 2 iron, 2 sulfur cluster binding (GO:0051537);;	K01772|0.0|tnl:113508950|K01772 hemH; protoporphyrin/coproporphyrin ferrochelatase [EC:4.99.1.1 4.99.1.9]	[H]	Coenzyme transport and metabolism	Ferrochelatase	Ferrochelatase, mitochondrial OS=Drosophila melanogaster OX=7227 GN=FeCh PE=2 SV=1	hypothetical protein B5V51_6080 [Heliothis virescens]
TRINITY_DN29787_c1_g1	0	15.631	6.24662	9.64e-05	0.00553729	up	--	--	--	--	--	--	--	--	uncharacterized protein LOC111347782 [Spodoptera litura]
TRINITY_DN17148_c0_g1	578.49	180.794	-1.67669	0.000626697	0.0214409	down	--	--	--	--|1e-141|haw:110379893|hypothetical protein	[S]	Function unknown	--	--	uncharacterized protein LOC111364917 [Spodoptera litura]
TRINITY_DN23118_c0_g1	0	48.4119	7.88309	8.01e-08	1.72e-05	up	[H]	Coenzyme transport and metabolism	Cellular Component: extracellular region (GO:0005576);;	--|7e-42|haw:110378967|hypothetical protein	--	--	--	Uncharacterized histidine-rich protein DDB_G0274557 OS=Dictyostelium discoideum OX=44689 GN=DDB_G0274557 PE=3 SV=1	uncharacterized protein LOC111359477 [Spodoptera litura]
TRINITY_DN21253_c0_g2	10.3592	84.5864	3.0106	0.0005418	0.0191786	up	--	--	Molecular Function: aminoacylase activity (GO:0004046);; Cellular Component: cytoplasm (GO:0005737);; Biological Process: cellular amino acid metabolic process (GO:0006520);; Molecular Function: metallopeptidase activity (GO:0008237);; Molecular Function: metal ion binding (GO:0046872);;	K14677|3e-23|haw:110370749|K14677 ACY1; aminoacylase [EC:3.5.1.14]	[E]	Amino acid transport and metabolism	Peptidase family M20/M25/M40	Aminoacylase-1 OS=Dictyostelium discoideum OX=44689 GN=acy1 PE=2 SV=1	aminoacylase 1 [Spodoptera frugiperda]
TRINITY_DN27406_c2_g2	14.0138	75.282	2.41673	4.29e-05	0.00295938	up	--	--	--	--|0.0|haw:110380577|hypothetical protein	[G]	Carbohydrate transport and metabolism	Major Facilitator Superfamily	--	monocarboxylate transporter 9-like [Spodoptera litura]
TRINITY_DN24896_c1_g2	0	16.8339	6.35848	2.75e-05	0.00209902	up	[F]	Nucleotide transport and metabolism	Molecular Function: xanthine dehydrogenase activity (GO:0004854);; Molecular Function: xanthine oxidase activity (GO:0004855);; Molecular Function: iron ion binding (GO:0005506);; Cellular Component: peroxisome (GO:0005777);; Cellular Component: cytosol (GO:0005829);; Cellular Component: microtubule associated complex (GO:0005875);; Biological Process: purine nucleobase metabolic process (GO:0006…	K00106|0.0|haw:110372181|K00106 XDH; xanthine dehydrogenase/oxidase [EC:1.17.1.4 1.17.3.2]	[F]	Nucleotide transport and metabolism	Molybdopterin-binding domain of aldehyde dehydrogenase	Xanthine dehydrogenase OS=Drosophila melanogaster OX=7227 GN=ry PE=2 SV=2	xanthine dehydrogenase/oxidase-like [Spodoptera litura]
TRINITY_DN17881_c0_g1	207.094	62.5808	-1.72834	9.76e-05	0.00558527	down	--	--	Biological Process: mitotic cytokinesis (GO:0000281);; Biological Process: establishment of planar polarity (GO:0001736);; Biological Process: apical constriction involved in gastrulation (GO:0003384);; Molecular Function: calcium ion binding (GO:0005509);; Cellular Component: cytoplasm (GO:0005737);; Cellular Component: cytosol (GO:0005829);; Cellular Component: plasma membrane (GO:0005886);; Ce…	K12757|1e-150|tnl:113496746|K12757 MYL12; myosin regulatory light chain 12	[Z]	Cytoskeleton	EF hand;; EF-hand domain;; Host cell surface-exposed lipoprotein	Myosin regulatory light chain sqh OS=Drosophila melanogaster OX=7227 GN=sqh PE=1 SV=1	calmodulin-beta [Spodoptera litura]
TRINITY_DN24473_c0_g2	8931.27	62.6086	-7.15762	2.97e-06	0.000352172	down	--	--	--	--|2e-40|tnl:113502043|hypothetical protein	--	--	--	--	uncharacterized protein LOC111353582 [Spodoptera litura]
TRINITY_DN24875_c2_g1	6.80104	34.7799	2.34604	0.00113936	0.0326154	up	--	--	--	--|6e-12|haw:110380309|hypothetical protein	--	--	--	--	craniofacial development protein 2-like [Helicoverpa armigera]
TRINITY_DN18874_c0_g1	0	25.0467	6.93314	1.43e-05	0.00124522	up	--	--	--	--|1e-24|tnl:113491823|hypothetical protein	--	--	--	--	uncharacterized protein LOC111354099 [Spodoptera litura]
TRINITY_DN31037_c6_g1	55437.8	3753.45	-3.88462	3.09e-09	1.1e-06	down	--	--	Biological Process: nematode larval development (GO:0002119);; Molecular Function: extracellular matrix structural constituent (GO:0005201);; Cellular Component: collagen trimer (GO:0005581);; Cellular Component: basement membrane (GO:0005604);; Biological Process: muscle organ development (GO:0007517);; Biological Process: embryo development ending in birth or egg hatching (GO:0009792);; Biologi…	K06237|0.0|haw:110380348|K06237 COL4A; collagen, type IV, alpha	[W]	Extracellular structures	C-terminal tandem repeated domain in type 4 procollagen;; Collagen triple helix repeat (20 copies)	Collagen alpha-1(IV) chain OS=Caenorhabditis elegans OX=6239 GN=emb-9 PE=1 SV=5	collagen alpha-1(IV) chain-like [Spodoptera litura]
TRINITY_DN31557_c1_g2	3386.48	10.9326	-8.28246	2.82e-07	5.22e-05	down	--	--	Molecular Function: structural constituent of cuticle (GO:0042302);;	--|4e-82|haw:110376214|hypothetical protein	--	--	Insect cuticle protein	Pupal cuticle protein 36 OS=Manduca sexta OX=7130 GN=PCP36 PE=1 SV=1	pupal cuticle protein 36a-like [Spodoptera litura]
TRINITY_DN29417_c3_g1	3037.42	440.233	-2.78614	2.74e-10	1.31e-07	down	--	--	Cellular Component: extracellular region (GO:0005576);;	--|1e-156|tnl:113499307|hypothetical protein	--	--	Lepidopteran low molecular weight (30 kD) lipoprotein	Microvitellogenin OS=Manduca sexta OX=7130 GN=MVG PE=2 SV=1	microvitellogenin-like [Spodoptera litura]
TRINITY_DN13781_c0_g2	0	8.86595	5.43115	0.00179392	0.0442297	up	[J]	Translation, ribosomal structure and biogenesis	Molecular Function: structural constituent of ribosome (GO:0003735);; Cellular Component: ribosome (GO:0005840);; Biological Process: translation (GO:0006412);; Molecular Function: rRNA binding (GO:0019843);;	K02940|1e-60|haw:110370731|K02940 RP-L9e; large subunit ribosomal protein L9e	[J]	Translation, ribosomal structure and biogenesis	Ribosomal protein L6	60S ribosomal protein L9 OS=Spodoptera frugiperda OX=7108 GN=RpL9 PE=2 SV=1	60S ribosomal protein L9 [Helicoverpa armigera]
TRINITY_DN20194_c0_g1	1237.21	97.339	-3.66763	4.28e-07	7.42e-05	down	--	--	Molecular Function: RNA polymerase II activity (GO:0001055);; Molecular Function: DNA binding (GO:0003677);; Molecular Function: DNA-directed 5'-3' RNA polymerase activity (GO:0003899);; Cellular Component: nucleus (GO:0005634);; Cellular Component: DNA-directed RNA polymerase II, core complex (GO:0005665);; Biological Process: transcription, DNA-templated (GO:0006351);; Biological Process: gastr…	--|1e-136|haw:110375863|hypothetical protein	--	--	--	DNA-directed RNA polymerase II subunit RPB1 OS=Caenorhabditis elegans OX=6239 GN=ama-1 PE=1 SV=3	extensin [Spodoptera litura]
TRINITY_DN22909_c0_g1	63.2195	16.1616	-1.96553	0.000695866	0.0228675	down	--	--	Molecular Function: structural constituent of ribosome (GO:0003735);; Cellular Component: ribosome (GO:0005840);; Biological Process: translation (GO:0006412);; Molecular Function: rRNA binding (GO:0019843);;	K02940|4e-10|pxy:105382907|K02940 RP-L9e; large subunit ribosomal protein L9e	--	--	--	60S ribosomal protein L9 OS=Spodoptera frugiperda OX=7108 GN=RpL9 PE=2 SV=1	PREDICTED: 60S ribosomal protein L9-like [Plutella xylostella]
TRINITY_DN21324_c0_g1	1.69254	20.9955	3.7528	0.000910634	0.0278434	up	--	--	--	K09542|5e-07|haw:110371284|K09542 CRYAB; crystallin, alpha B	--	--	--	--	heat shock protein 22 [Mythimna separata]
TRINITY_DN20990_c0_g1	66.5285	237.334	1.82703	0.00185278	0.0451805	up	--	--	--	--|5e-94|haw:110372651|hypothetical protein	--	--	Alcohol dehydrogenase transcription factor Myb/SANT-like;; BESS motif	--	uncharacterized protein LOC111362407 [Spodoptera litura]
TRINITY_DN25862_c0_g3	476.93	138.69	-1.78062	0.000974573	0.0292012	down	--	--	Cellular Component: mitochondrial intermembrane space (GO:0005758);; Cellular Component: mitochondrial matrix (GO:0005759);; Biological Process: succinate metabolic process (GO:0006105);; Biological Process: regulation of gluconeogenesis (GO:0006111);; Biological Process: response to oxidative stress (GO:0006979);; Biological Process: mitochondrial respiratory chain complex II assembly (GO:003455…	--|9e-65|haw:110375741|hypothetical protein	[S]	Function unknown	Complex1_LYR-like;; Complex 1 protein (LYR family)	Succinate dehydrogenase assembly factor 3, mitochondrial OS=Drosophila melanogaster OX=7227 GN=Sdhaf3 PE=2 SV=1	succinate dehydrogenase assembly factor 3, mitochondrial [Spodoptera litura]
TRINITY_DN31146_c1_g1	10.9798	65.7095	2.55155	0.00173402	0.0432454	up	[R]	General function prediction only	--	--|0.0|haw:110378633|hypothetical protein	[TR]	--	Rab-GTPase-TBC domain	--	TBC1 domain family member 16 isoform X1 [Spodoptera litura]
TRINITY_DN23898_c1_g3	22.176	633.627	4.84866	1.06e-08	3.27e-06	up	[G]	Carbohydrate transport and metabolism	Biological Process: carbohydrate metabolic process (GO:0005975);; Molecular Function: thioglucosidase activity (GO:0019137);; Molecular Function: metal ion binding (GO:0046872);;	--|1e-74|haw:110381159|hypothetical protein	[G]	Carbohydrate transport and metabolism	Glycosyl hydrolase family 1	Myrosinase 1 OS=Brevicoryne brassicae OX=69196 PE=1 SV=1	myrosinase 1-like [Spodoptera litura]
TRINITY_DN20939_c1_g3	665.248	0.92141	-9.51484	0.000433154	0.0163692	down	--	--	--	--|5e-16|haw:110370213|hypothetical protein	--	--	--	--	cuticle protein 16.5-like [Spodoptera litura]
TRINITY_DN20743_c4_g1	64.0229	17.7865	-1.85533	0.00139195	0.0376971	down	[R]	General function prediction only	Molecular Function: magnesium ion binding (GO:0000287);; Molecular Function: GTPase activity (GO:0003924);; Molecular Function: GTP binding (GO:0005525);; Cellular Component: nucleolus (GO:0005730);; Biological Process: ribosome biogenesis (GO:0042254);;	K03979|3e-99|haw:110380943|K03979 obgE; GTPase [EC:3.6.5.-]	[R]	General function prediction only	50S ribosome-binding GTPase;; Ferrous iron transport protein B	GTP-binding protein 10 homolog OS=Drosophila melanogaster OX=7227 GN=CG10628 PE=2 SV=2	hypothetical protein B5V51_3322 [Heliothis virescens]
TRINITY_DN23445_c1_g1	517.315	204.692	-1.33682	0.000267026	0.0115664	down	[H]	Coenzyme transport and metabolism	Molecular Function: ATP binding (GO:0005524);; Cellular Component: cytoplasm (GO:0005737);; Molecular Function: riboflavin kinase activity (GO:0008531);; Biological Process: riboflavin biosynthetic process (GO:0009231);; Biological Process: FMN biosynthetic process (GO:0009398);; Molecular Function: metal ion binding (GO:0046872);;	K00861|1e-43|tnl:113499353|K00861 RFK; riboflavin kinase [EC:2.7.1.26]	[H]	Coenzyme transport and metabolism	Riboflavin kinase	Putative riboflavin kinase OS=Drosophila melanogaster OX=7227 GN=anon-84Ea PE=2 SV=1	riboflavin kinase [Helicoverpa armigera]
TRINITY_DN18148_c0_g1	64.0973	3.02584	-4.4275	5.22e-05	0.00339666	down	[R]	General function prediction only	Cellular Component: endoplasmic reticulum membrane (GO:0005789);; Cellular Component: integral component of membrane (GO:0016021);; Biological Process: aromatic compound catabolic process (GO:0019439);; Cellular Component: organelle membrane (GO:0031090);; Molecular Function: cis-stilbene-oxide hydrolase activity (GO:0033961);;	K10719|0.0|tnl:113501364|K10719 JHEH; juvenile hormone epoxide hydrolase	[R]	General function prediction only	Epoxide hydrolase N terminus;; alpha/beta hydrolase fold;; Alpha/beta hydrolase family	Juvenile hormone epoxide hydrolase OS=Bombyx mori OX=7091 GN=JHEH PE=1 SV=1	juvenile hormone epoxide hydrolase-like [Spodoptera litura]
TRINITY_DN29479_c1_g1	49.5513	150.745	1.59753	0.00184264	0.044997	up	[U]	Intracellular trafficking, secretion, and vesicular transport	Molecular Function: GTPase activity (GO:0003924);; Molecular Function: GTPase activator activity (GO:0005096);; Molecular Function: GTP binding (GO:0005525);; Cellular Component: intracellular (GO:0005622);; Biological Process: small GTPase mediated signal transduction (GO:0007264);; Cellular Component: membrane (GO:0016020);; Biological Process: regulation of GTPase activity (GO:0043087);; Biolo…	--|0.0|haw:110370084|hypothetical protein	[T]	Signal transduction mechanisms	Putative GTPase activating protein for Arf;; PH domain	Centaurin-gamma-1A OS=Drosophila melanogaster OX=7227 GN=CenG1A PE=2 SV=2	arf-GAP with dual PH domain-containing protein 1-like isoform X3 [Spodoptera litura]
TRINITY_DN20893_c0_g1	1937.75	477.114	-2.02157	0.000119543	0.00640473	down	[J]	Translation, ribosomal structure and biogenesis	Molecular Function: structural constituent of ribosome (GO:0003735);; Cellular Component: mitochondrion (GO:0005739);; Cellular Component: mitochondrial small ribosomal subunit (GO:0005763);; Biological Process: translation (GO:0006412);; Biological Process: mitochondrial translation (GO:0032543);; Biological Process: regulation of growth (GO:0040008);;	K02956|1e-166|tnl:113494267|K02956 RP-S15; small subunit ribosomal protein S15	[J]	Translation, ribosomal structure and biogenesis	Ribosomal protein S15	28S ribosomal protein S15, mitochondrial OS=Drosophila melanogaster OX=7227 GN=bonsai PE=2 SV=2	28S ribosomal protein S15, mitochondrial [Spodoptera litura]
TRINITY_DN22402_c3_g1	2759.74	1026.03	-1.4274	0.00024994	0.0110299	down	[F]	Nucleotide transport and metabolism	Molecular Function: adenylate kinase activity (GO:0004017);; Molecular Function: nucleoside diphosphate kinase activity (GO:0004550);; Molecular Function: ATP binding (GO:0005524);; Cellular Component: cytoplasm (GO:0005737);; Biological Process: nucleoside triphosphate biosynthetic process (GO:0009142);; Biological Process: ATP metabolic process (GO:0046034);;	K00939|1e-121|haw:110379686|K00939 adk; adenylate kinase [EC:2.7.4.3]	[F]	Nucleotide transport and metabolism	Adenylate kinase;; AAA domain	Adenylate kinase isoenzyme 1 OS=Caenorhabditis elegans OX=6239 GN=F38B2.4 PE=2 SV=1	adenylate kinase isoenzyme 1 [Spodoptera litura]
TRINITY_DN22806_c3_g1	29.0074	113.089	1.97022	0.00156572	0.0407636	up	--	--	Molecular Function: serine-type endopeptidase activity (GO:0004252);; Cellular Component: extracellular region (GO:0005576);; Biological Process: proteolysis (GO:0006508);; Biological Process: maternal specification of dorsal/ventral axis, oocyte, germ-line encoded (GO:0007311);; Biological Process: Toll signaling pathway (GO:0008063);; Molecular Function: peptidase activity (GO:0008233);; Molecu…	--|1e-122|haw:110378965|hypothetical protein	[E]	Amino acid transport and metabolism	Trypsin	Serine protease snake OS=Drosophila melanogaster OX=7227 GN=snk PE=1 SV=2	serine protease Hayan-like [Spodoptera litura]
TRINITY_DN32118_c1_g1	1081.32	469.867	-1.2028	0.00051081	0.0183002	down	[R]	General function prediction only	Molecular Function: nucleotide binding (GO:0000166);; Biological Process: mRNA splicing, via spliceosome (GO:0000398);; Molecular Function: mRNA binding (GO:0003729);; Molecular Function: mRNA 3'-UTR binding (GO:0003730);; Cellular Component: nucleus (GO:0005634);; Cellular Component: cytoplasm (GO:0005737);; Cellular Component: lipid droplet (GO:0005811);; Cellular Component: cytosol (GO:0005829…	--|1e-141|pmac:106712865|hypothetical protein	[A]	RNA processing and modification	RNA recognition motif. (a.k.a. RRM, RBD, or RNP domain);; Domain of unknown function (DUF1866)	Polyadenylate-binding protein OS=Drosophila melanogaster OX=7227 GN=pAbp PE=1 SV=3	heterogeneous nuclear ribonucleoprotein R isoform X4 [Spodoptera litura]
TRINITY_DN31872_c5_g1	13.6461	99.7278	2.85891	0.00109625	0.0317509	up	--	--	Cellular Component: extracellular region (GO:0005576);;	--|0.0|haw:110381891|hypothetical protein	[T]	Signal transduction mechanisms	Trypsin Inhibitor like cysteine rich domain	Balbiani ring protein 3 OS=Chironomus tentans OX=7153 GN=BR3 PE=2 SV=1	zonadhesin-like [Spodoptera litura]
TRINITY_DN21714_c1_g1	21.5569	131.894	2.6119	1.23e-05	0.00112145	up	--	--	--	--|1e-10|tnl:113496461|hypothetical protein	--	--	--	--	lipase member H-like [Spodoptera litura]
TRINITY_DN18882_c0_g3	5592.62	377.631	-3.8887	0.00162931	0.041887	down	--	--	Molecular Function: structural constituent of cuticle (GO:0042302);;	--|1e-50|haw:110384199|hypothetical protein	--	--	--	Larval cuticle protein LCP-22 OS=Bombyx mori OX=7091 GN=LCP22 PE=2 SV=1	larval cuticle protein LCP-22-like [Spodoptera litura]
TRINITY_DN24773_c0_g1	261.793	72.3282	-1.8554	0.000442196	0.0166473	down	--	--	Biological Process: response to hypoxia (GO:0001666);; Cellular Component: mitochondrial respiratory chain complex I (GO:0005747);; Biological Process: oxidative phosphorylation (GO:0006119);; Biological Process: mitochondrial electron transport, NADH to ubiquinone (GO:0006120);; Biological Process: mitochondrion organization (GO:0007005);; Biological Process: response to heat (GO:0009408);; Biol…	K18159|1e-174|haw:110378591|K18159 NDUFAF1; NADH dehydrogenase [ubiquinone] 1 alpha subcomplex assembly factor 1	[S]	Function unknown	Complex I intermediate-associated protein 30 (CIA30)	Complex I intermediate-associated protein 30, mitochondrial OS=Drosophila melanogaster OX=7227 GN=CIA30 PE=2 SV=1	complex I intermediate-associated protein 30, mitochondrial [Spodoptera litura]
TRINITY_DN26129_c0_g1	30.3868	189.05	2.64485	0.000171745	0.00835542	up	--	--	Molecular Function: serine-type endopeptidase activity (GO:0004252);; Cellular Component: extracellular space (GO:0005615);;	--|6e-14|haw:110384479|hypothetical protein	--	--	--	Trypsin beta OS=Drosophila erecta OX=7220 GN=betaTry PE=3 SV=1	chymotrypsin precursor [Spodoptera frugiperda]
TRINITY_DN28299_c2_g1	982.476	332.751	-1.56129	0.000698392	0.0228893	down	[J]	Translation, ribosomal structure and biogenesis	Molecular Function: structural constituent of ribosome (GO:0003735);; Cellular Component: mitochondrion (GO:0005739);; Cellular Component: ribosome (GO:0005840);; Biological Process: translation (GO:0006412);;	K02906|1e-151|haw:110373071|K02906 RP-L3; large subunit ribosomal protein L3	[J]	Translation, ribosomal structure and biogenesis	Ribosomal protein L3	Putative 39S ribosomal protein L3, mitochondrial OS=Caenorhabditis elegans OX=6239 GN=mrps-18C PE=3 SV=3	39S ribosomal protein L3, mitochondrial [Spodoptera litura]
TRINITY_DN24110_c1_g1	1146.24	473.75	-1.27481	0.00131094	0.036232	down	--	--	--	--|0.0|haw:110381226|hypothetical protein	[O]	Posttranslational modification, protein turnover, chaperones	Carboxypeptidase regulatory-like domain;; SdrD B-like domain	--	nodal modulator 1 [Spodoptera litura]
TRINITY_DN22109_c2_g2	815.451	353.955	-1.20352	0.00163437	0.0419247	down	--	--	--	K03951|4e-65|haw:110370834|K03951 NDUFA7; NADH dehydrogenase (ubiquinone) 1 alpha subcomplex subunit 7	[C]	Energy production and conversion	NADH:ubiquinone oxidoreductase subunit B14.5a (Complex I-B14.5a)	--	NADH dehydrogenase [ubiquinone] 1 alpha subcomplex subunit 7-like [Spodoptera litura]
TRINITY_DN18609_c0_g1	2.23228	59.9413	4.75867	1.58e-07	3.1e-05	up	[GC]	--	Molecular Function: glucuronosyltransferase activity (GO:0015020);; Cellular Component: integral component of membrane (GO:0016021);; Molecular Function: oxidoreductase activity (GO:0016491);; Cellular Component: intracellular membrane-bounded organelle (GO:0043231);;	K00699|0.0|haw:110373493|K00699 UGT; glucuronosyltransferase [EC:2.4.1.17]	[GC]	--	UDP-glucoronosyl and UDP-glucosyl transferase;; Glycosyltransferase family 28 C-terminal domain	Putative UDP-glucuronosyltransferase ugt-58 OS=Caenorhabditis elegans OX=6239 GN=ugt-58 PE=3 SV=2	putative UDP-glucuronosyltransferase ugt-58 [Spodoptera litura]
TRINITY_DN28763_c0_g1	1182.92	283.598	-2.06017	0.000266134	0.0115447	down	--	--	--	--|1e-106|haw:110377213|hypothetical protein	[E]	Amino acid transport and metabolism	--	--	serine protease precursor [Bombyx mori]
TRINITY_DN17887_c0_g1	1.44618	28.5372	4.53719	0.000238065	0.0106137	up	--	--	--	--|1e-145|tnl:113496012|hypothetical protein	--	--	--	--	hypothetical protein B5V51_12087 [Heliothis virescens]
TRINITY_DN30623_c0_g1	116.725	328.982	1.49647	0.000275717	0.0118477	up	--	--	Molecular Function: RNA polymerase II regulatory region sequence-specific DNA binding (GO:0000977);; Molecular Function: RNA polymerase II transcription factor binding (GO:0001085);; Molecular Function: transcriptional activator activity, RNA polymerase II transcription regulatory region sequence-specific DNA binding (GO:0001228);; Molecular Function: chromatin binding (GO:0003682);; Cellular Com…	--|5e-49|haw:110376659|hypothetical protein	--	--	--	GATA zinc finger domain-containing protein 14 OS=Dictyostelium discoideum OX=44689 GN=gtaN PE=4 SV=1	uncharacterized protein LOC111351026 [Spodoptera litura]
TRINITY_DN28329_c1_g1	17.7404	115.68	2.70402	0.000974521	0.0292012	up	--	--	Molecular Function: acid phosphatase activity (GO:0003993);; Cellular Component: extracellular region (GO:0005576);;	K14410|1e-173|haw:110373517|K14410 ACP2; lysosomal acid phosphatase [EC:3.1.3.2]	[I]	Lipid transport and metabolism	Histidine phosphatase superfamily (branch 2)	Venom acid phosphatase Acph-1 OS=Apis mellifera OX=7460 PE=1 SV=1	prostatic acid phosphatase-like [Spodoptera litura]
TRINITY_DN19325_c0_g1	818.139	249.442	-1.7128	0.000491348	0.0177997	down	--	--	Molecular Function: structural constituent of ribosome (GO:0003735);; Cellular Component: mitochondrial large ribosomal subunit (GO:0005762);; Biological Process: translation (GO:0006412);; Biological Process: mitochondrial translation (GO:0032543);;	K02939|1e-154|haw:110373451|K02939 RP-L9; large subunit ribosomal protein L9	[J]	Translation, ribosomal structure and biogenesis	Ribosomal protein L9, N-terminal domain	39S ribosomal protein L9, mitochondrial OS=Drosophila melanogaster OX=7227 GN=mRpL9 PE=2 SV=1	39S ribosomal protein L9, mitochondrial [Spodoptera litura]
TRINITY_DN27474_c0_g2	14.4013	54.1131	1.90415	0.000387885	0.0151486	up	[O]	Posttranslational modification, protein turnover, chaperones	Molecular Function: ATP binding (GO:0005524);; Cellular Component: mitochondrion (GO:0005739);; Cellular Component: lipid droplet (GO:0005811);; Cellular Component: microtubule associated complex (GO:0005875);; Biological Process: protein folding (GO:0006457);; Biological Process: determination of adult lifespan (GO:0008340);; Biological Process: neurogenesis (GO:0022008);; Biological Process: re…	K03283|0.0|haw:110375004|K03283 HSPA1s; heat shock 70kDa protein 1/2/6/8	[O]	Posttranslational modification, protein turnover, chaperones	Hsp70 protein;; MreB/Mbl protein	Heat shock protein 68 OS=Drosophila melanogaster OX=7227 GN=Hsp68 PE=1 SV=1	heat shock protein 68-like [Spodoptera litura]
TRINITY_DN22894_c1_g1	0	12.2143	5.897	0.000283858	0.0120317	up	--	--	--	--|1e-12|pmac:106709329|hypothetical protein	--	--	--	--	PREDICTED: uncharacterized protein LOC106125039 [Papilio xuthus]
TRINITY_DN23204_c0_g2	0.293391	1177.65	11.524	6.62e-10	2.76e-07	up	--	--	Cellular Component: extracellular region (GO:0005576);; Biological Process: killing of cells of other organism (GO:0031640);; Biological Process: defense response to bacterium (GO:0042742);; Biological Process: innate immune response (GO:0045087);; Biological Process: defense response to fungus (GO:0050832);;	--	--	--	--	Spodomicin OS=Spodoptera littoralis OX=7109 PE=1 SV=1	diapausin A1 [Spodoptera exigua]
TRINITY_DN30820_c1_g6	82.9462	448.882	2.44008	0.000131821	0.00692441	up	[E]	Amino acid transport and metabolism	Cellular Component: mitochondrion (GO:0005739);; Molecular Function: alanine-glyoxylate transaminase activity (GO:0008453);; Biological Process: arginine catabolic process to glutamate (GO:0019544);; Molecular Function: pyridoxal phosphate binding (GO:0030170);; Biological Process: response to nicotine (GO:0035094);; Molecular Function: identical protein binding (GO:0042802);;	K00827|6e-76|tnl:113498037|K00827 AGXT2; alanine-glyoxylate transaminase / (R)-3-amino-2-methylpropionate-pyruvate transaminase [EC:2.6.1.44 2.6.1.40]	[E]	Amino acid transport and metabolism	Aminotransferase class-III	Alanine--glyoxylate aminotransferase 2-like OS=Drosophila melanogaster OX=7227 GN=CG8745 PE=2 SV=2	alanine--glyoxylate aminotransferase 2, mitochondrial [Spodoptera litura]
TRINITY_DN22118_c5_g1	126.516	510.928	2.01518	0.000400784	0.0154414	up	--	--	--	--|1e-116|haw:110384691|hypothetical protein	--	--	Chitin binding Peritrophin-A domain	--	peritrophin-1-like [Spodoptera litura]
TRINITY_DN31682_c1_g2	234.547	76.6738	-1.61056	0.000212105	0.00984992	down	[K]	Transcription	Molecular Function: DNA binding (GO:0003677);; Molecular Function: DNA-directed 5'-3' RNA polymerase activity (GO:0003899);; Cellular Component: DNA-directed RNA polymerase I complex (GO:0005736);; Biological Process: transcription by RNA polymerase I (GO:0006360);; Biological Process: cell growth (GO:0016049);; Biological Process: neurogenesis (GO:0022008);; Molecular Function: ribonucleoside bi…	K03002|0.0|haw:110377060|K03002 RPA2; DNA-directed RNA polymerase I subunit RPA2 [EC:2.7.7.6]	[K]	Transcription	RNA polymerase Rpb2, domain 3;; RNA polymerase Rpb2, domain 2;; RNA polymerase I, Rpa2 specific domain	DNA-directed RNA polymerase I subunit RPA2 OS=Drosophila melanogaster OX=7227 GN=RpI135 PE=1 SV=2	LOW QUALITY PROTEIN: DNA-directed RNA polymerase I subunit RPA2 [Helicoverpa armigera]
TRINITY_DN23129_c0_g1	42.8608	2.74826	-3.94332	0.000416904	0.0159176	down	[IQR]	--	Molecular Function: catalytic activity (GO:0003824);; Molecular Function: carbonyl reductase (NADPH) activity (GO:0004090);; Cellular Component: plasma membrane (GO:0005886);; Biological Process: xylulose metabolic process (GO:0005997);; Biological Process: xylulose catabolic process (GO:0005998);; Biological Process: glucose metabolic process (GO:0006006);; Biological Process: D-xylose metabolic…	--|1e-102|bmor:101742703|hypothetical protein	[R]	General function prediction only	Enoyl-(Acyl carrier protein) reductase;; short chain dehydrogenase;; KR domain	L-xylulose reductase OS=Caenorhabditis elegans OX=6239 GN=dhs-21 PE=1 SV=2	uncharacterized protein LOC111353799 [Spodoptera litura]
TRINITY_DN21613_c4_g1	1.25751	20.0881	4.12928	0.00069388	0.0228675	up	--	--	--	--	--	--	--	--	uncharacterized protein LOC111356576 [Spodoptera litura]
TRINITY_DN28150_c1_g1	31.6435	2.15797	-3.9333	9.8e-05	0.0055954	down	--	--	--	K00699|3e-16|haw:110381614|K00699 UGT; glucuronosyltransferase [EC:2.4.1.17]	[GC]	--	UDP-glucoronosyl and UDP-glucosyl transferase	--	UDP-glucuronosyltransferase 2B20-like [Spodoptera litura]
TRINITY_DN31499_c1_g2	660.483	44.3378	-3.89822	0.000472295	0.0174353	down	--	--	Cellular Component: peroxisome (GO:0005777);; Cellular Component: peroxisomal membrane (GO:0005778);; Biological Process: ether lipid biosynthetic process (GO:0008611);; Biological Process: wax biosynthetic process (GO:0010025);; Cellular Component: integral component of membrane (GO:0016021);; Molecular Function: long-chain-fatty-acyl-CoA reductase activity (GO:0050062);; Molecular Function: fat…	K13356|1e-179|haw:110381393|K13356 FAR; alcohol-forming fatty acyl-CoA reductase [EC:1.2.1.84]	[I]	Lipid transport and metabolism	Male sterility protein;; Male sterility protein	Putative fatty acyl-CoA reductase CG5065 OS=Drosophila melanogaster OX=7227 GN=CG5065 PE=3 SV=1	putative fatty acyl-CoA reductase CG5065 [Spodoptera litura]
TRINITY_DN30144_c0_g1	1398.61	510.581	-1.4532	0.000850093	0.0265122	down	[J]	Translation, ribosomal structure and biogenesis	Molecular Function: tRNA binding (GO:0000049);; Biological Process: RNA methylation (GO:0001510);; Cellular Component: nucleus (GO:0005634);; Cellular Component: nucleolus (GO:0005730);; Cellular Component: cytoplasm (GO:0005737);; Biological Process: short-term memory (GO:0007614);; Molecular Function: tRNA (cytosine-5-)-methyltransferase activity (GO:0016428);; Biological Process: tRNA methylat…	K15335|0.0|haw:110381723|K15335 NSUN2; tRNA (cytosine34-C5)-methyltransferase [EC:2.1.1.203]	[J]	Translation, ribosomal structure and biogenesis	16S rRNA methyltransferase RsmB/F	tRNA (cytosine(34)-C(5))-methyltransferase OS=Drosophila melanogaster OX=7227 GN=Nsun2 PE=2 SV=1	tRNA (cytosine(34)-C(5))-methyltransferase [Spodoptera litura]
TRINITY_DN20240_c1_g5	4.18129	26.9462	2.65475	0.000500483	0.0180833	up	--	--	--	--|5e-14|pxy:105384369|hypothetical protein	--	--	--	--	zinc metalloproteinase nas-4-like precursor [Plutella xylostella]
TRINITY_DN27206_c0_g1	229.595	1299.63	2.50004	4.2e-05	0.00290983	up	--	--	Molecular Function: serine-type endopeptidase activity (GO:0004252);; Biological Process: collagen catabolic process (GO:0030574);;	--|5e-37|haw:110384479|hypothetical protein	[E]	Amino acid transport and metabolism	Trypsin	Brachyurin OS=Leptuca pugilator OX=6772 PE=1 SV=2	chymotrypsin precursor [Spodoptera frugiperda]
TRINITY_DN19806_c0_g1	2431.2	41.1404	-5.88554	1.75e-05	0.0014591	down	--	--	Cellular Component: extracellular region (GO:0005576);; Molecular Function: phosphatidylcholine 1-acylhydrolase activity (GO:0008970);; Biological Process: lipid catabolic process (GO:0016042);;	K19404|1e-101|haw:110376146|K19404 LIPH_I; phosphatidic acid-selective phospholipase A1 [EC:3.1.1.-]	--	--	Lipase	Probable phospholipase A1 magnifin OS=Vespa magnifica OX=202807 PE=1 SV=1	lipase member H-like [Spodoptera litura]
TRINITY_DN16749_c0_g1	0.293391	18.3571	5.52105	0.000151711	0.00763142	up	--	--	--	--	--	--	--	--	mucin-5AC isoform X1 [Spodoptera litura]
TRINITY_DN22072_c0_g1	4558.7	133.276	-5.09702	1.16e-06	0.000166388	down	--	--	Molecular Function: structural constituent of cuticle (GO:0042302);;	--|3e-55|haw:110373770|hypothetical protein	--	--	Cuticle protein CPCFC	Cuticle protein 1 OS=Blaberus craniifer OX=6982 PE=1 SV=1	cuticle protein 1 [Spodoptera litura]
TRINITY_DN22234_c1_g1	71.0649	316.188	2.14743	0.000871241	0.0269704	up	--	--	--	--	--	--	--	--	trypsin, alkaline C-like [Spodoptera litura]
TRINITY_DN29498_c0_g1	577.566	188.521	-1.61379	0.000279072	0.0118798	down	--	--	Biological Process: ribosomal large subunit biogenesis (GO:0042273);;	--|0.0|haw:110372111|hypothetical protein	[A]	RNA processing and modification	Methyltransferase domain;; Essential protein Yae1, N terminal	Protein ORAOV1 homolog OS=Dictyostelium discoideum OX=44689 GN=DDB_G0272178 PE=3 SV=1	methyltransferase-like protein 25 isoform X1 [Spodoptera litura]
TRINITY_DN25427_c0_g2	1.60858	18.1659	3.39158	0.00180286	0.0444017	up	--	--	--	--|1e-47|haw:110373902|hypothetical protein	--	--	--	--	glutamate-gated chloride channel alpha isoform X24 [Helicoverpa armigera]
TRINITY_DN22821_c1_g1	0.586781	1175.34	10.6983	7.64e-19	1.41e-15	up	--	--	Molecular Function: protein serine/threonine kinase activity (GO:0004674);; Molecular Function: ATP binding (GO:0005524);;	K23573|4e-12|bbub:102391757|K23573 DSPP; dentin sialophosphoprotein	--	--	--	Probable serine/threonine-protein kinase ifkC OS=Dictyostelium discoideum OX=44689 GN=ifkC PE=3 SV=1	PREDICTED: dentin sialophosphoprotein [Crassostrea gigas]
TRINITY_DN17638_c0_g1	842.871	220.022	-1.93664	0.000384654	0.0151147	down	--	--	Molecular Function: nucleotide binding (GO:0000166);; Molecular Function: DNA binding (GO:0003677);; Molecular Function: RNA binding (GO:0003723);; Molecular Function: structural constituent of ribosome (GO:0003735);; Cellular Component: mitochondrial large ribosomal subunit (GO:0005762);; Molecular Function: type II site-specific deoxyribonuclease activity (GO:0009036);; Biological Process: DNA …	K02892|3e-89|haw:110370410|K02892 RP-L23; large subunit ribosomal protein L23	[J]	Translation, ribosomal structure and biogenesis	Ribosomal protein L23	Probable 39S ribosomal protein L23, mitochondrial OS=Anopheles gambiae OX=7165 GN=mRpL23 PE=3 SV=1	39S ribosomal protein L23, mitochondrial [Spodoptera litura]
TRINITY_DN22235_c0_g2	7.38782	153.979	4.37582	0.000183415	0.00883613	up	--	--	--	--|6e-44|haw:110372660|hypothetical protein	--	--	Myb/SANT-like DNA-binding domain	--	fibrinogen silencer-binding protein-like [Spodoptera litura]
TRINITY_DN31123_c0_g2	2256.71	881.905	-1.3557	0.000639468	0.0216599	down	--	--	Molecular Function: calcium ion binding (GO:0005509);; Cellular Component: endoplasmic reticulum membrane (GO:0005789);; Biological Process: protein folding (GO:0006457);; Biological Process: multicellular organism development (GO:0007275);; Biological Process: response to heat (GO:0009408);; Cellular Component: integral component of membrane (GO:0016021);; Biological Process: endoplasmic reticul…	K08054|4e-92|haw:110374387|K08054 CANX; calnexin	[O]	Posttranslational modification, protein turnover, chaperones	Calreticulin family	Calnexin OS=Caenorhabditis briggsae OX=6238 GN=cnx-1 PE=3 SV=3	calnexin [Spodoptera litura]
TRINITY_DN27008_c0_g2	476.112	1670.05	1.81101	0.00045088	0.016867	up	--	--	Biological Process: ribosomal small subunit export from nucleus (GO:0000056);; Cellular Component: nucleus (GO:0005634);; Biological Process: rRNA processing (GO:0006364);; Biological Process: cell growth (GO:0016049);; Cellular Component: cytosolic small ribosomal subunit (GO:0022627);; Cellular Component: preribosome, small subunit precursor (GO:0030688);; Cellular Component: late endosome memb…	K14798|7e-95|haw:110381160|K14798 LTV1; protein LTV1	[S]	Function unknown	Low temperature viability protein	Protein LTV1 homolog OS=Drosophila melanogaster OX=7227 GN=CG7686 PE=1 SV=1	protein LTV1 homolog [Spodoptera litura]
TRINITY_DN21731_c0_g2	285.382	119.738	-1.25231	0.00166215	0.0423433	down	[D]	Cell cycle control, cell division, chromosome partitioning	Molecular Function: ATP binding (GO:0005524);; Cellular Component: cytosol (GO:0005829);; Biological Process: iron-sulfur cluster assembly (GO:0016226);; Molecular Function: metal ion binding (GO:0046872);; Molecular Function: iron-sulfur cluster binding (GO:0051536);; Molecular Function: 4 iron, 4 sulfur cluster binding (GO:0051539);;	--|1e-116|tnl:113498104|hypothetical protein	[D]	Cell cycle control, cell division, chromosome partitioning	NUBPL iron-transfer P-loop NTPase;; CobQ/CobB/MinD/ParA nucleotide binding domain	Cytosolic Fe-S cluster assembly factor NUBP1 homolog OS=Anopheles gambiae OX=7165 GN=AGAP011997 PE=3 SV=3	cytosolic Fe-S cluster assembly factor NUBP1 homolog [Spodoptera litura]
TRINITY_DN17433_c0_g1	0	8.76869	5.41663	0.00142507	0.0382916	up	[J]	Translation, ribosomal structure and biogenesis	Molecular Function: structural constituent of ribosome (GO:0003735);; Cellular Component: ribosome (GO:0005840);; Biological Process: translation (GO:0006412);; Molecular Function: rRNA binding (GO:0019843);;	K02938|1e-126|dpte:113799820|K02938 RP-L8e; large subunit ribosomal protein L8e	[J]	Translation, ribosomal structure and biogenesis	Ribosomal Proteins L2, C-terminal domain;; Ribosomal Proteins L2, RNA binding domain	60S ribosomal protein L8 OS=Spodoptera frugiperda OX=7108 GN=RpL8 PE=2 SV=1	60S ribosomal protein L2-A-like [Mizuhopecten yessoensis]
TRINITY_DN28071_c0_g3	9168.93	259.5	-5.14307	0.000573351	0.0200321	down	--	--	Molecular Function: retinoid binding (GO:0005501);; Biological Process: visual perception (GO:0007601);; Biological Process: phototransduction (GO:0007602);; Biological Process: rhodopsin biosynthetic process (GO:0016063);; Molecular Function: retinal binding (GO:0016918);; Molecular Function: retinol binding (GO:0019841);;	--|0.0|haw:110381078|hypothetical protein	[I]	Lipid transport and metabolism	CRAL/TRIO domain	Retinol-binding protein pinta OS=Drosophila melanogaster OX=7227 GN=pinta PE=2 SV=1	alpha-tocopherol transfer protein-like [Spodoptera litura]
TRINITY_DN23267_c1_g1	26.9183	582.647	4.43981	2.61e-10	1.27e-07	up	--	--	Molecular Function: glutathione transferase activity (GO:0004364);;	K00799|3e-68|haw:110369738|K00799 GST; glutathione S-transferase [EC:2.5.1.18]	[O]	Posttranslational modification, protein turnover, chaperones	Glutathione S-transferase, C-terminal domain;; Glutathione S-transferase, C-terminal domain;; Glutathione S-transferase, C-terminal domain	Glutathione S-transferase 1 OS=Musca domestica OX=7370 GN=Gst1 PE=2 SV=1	glutathione S-transferase 1-like [Spodoptera litura]
TRINITY_DN24707_c0_g2	160.35	1096	2.77246	5.62e-09	1.81e-06	up	--	--	--	K09542|6e-11|haw:110371284|K09542 CRYAB; crystallin, alpha B	--	--	--	--	protein lethal(2)essential for life-like [Spodoptera litura]
TRINITY_DN23350_c1_g1	2074.92	84.3203	-4.62225	1.43e-05	0.00124522	down	--	--	Molecular Function: odorant binding (GO:0005549);; Cellular Component: extracellular region (GO:0005576);; Biological Process: transport (GO:0006810);; Biological Process: sensory perception of smell (GO:0007608);; Biological Process: response to stimulus (GO:0050896);;	--|2e-49|pmac:106721342|hypothetical protein	--	--	--	General odorant-binding protein 70 OS=Anopheles gambiae OX=7165 GN=Obp70 PE=3 SV=2	hypothetical protein RR46_08615 [Papilio xuthus]
TRINITY_DN17101_c0_g1	1138.67	354.306	-1.68367	8.85e-06	0.000854115	down	--	--	--	K17429|1e-113|haw:110371625|K17429 MRPL48; large subunit ribosomal protein L48	[S]	Function unknown	Ribosomal protein S10p/S20e	--	uncharacterized protein LOC111348585 [Spodoptera litura]
TRINITY_DN25691_c0_g1	3255.32	749.341	-2.1189	0.00189838	0.0459355	down	[E]	Amino acid transport and metabolism	Molecular Function: asparagine synthase (glutamine-hydrolyzing) activity (GO:0004066);; Molecular Function: ATP binding (GO:0005524);; Biological Process: asparagine biosynthetic process (GO:0006529);; Biological Process: glutamine metabolic process (GO:0006541);; Molecular Function: protein homodimerization activity (GO:0042803);; Cellular Component: phagocytic vesicle (GO:0045335);; Biological …	K01953|0.0|haw:110370461|K01953 asnB; asparagine synthase (glutamine-hydrolysing) [EC:6.3.5.4]	[E]	Amino acid transport and metabolism	Asparagine synthase;; Glutamine amidotransferase domain;; Glutamine amidotransferase domain	Probable asparagine synthetase [glutamine-hydrolyzing] OS=Dictyostelium discoideum OX=44689 GN=asns PE=1 SV=1	asparagine synthetase [glutamine-hydrolyzing] [Spodoptera litura]
TRINITY_DN22615_c1_g3	1.24438	23.1024	4.0698	0.000387999	0.0151486	up	--	--	--	--|6e-11|haw:110384166|hypothetical protein	--	--	--	--	luciferin 4-monooxygenase-like [Spodoptera litura]
TRINITY_DN30319_c0_g1	3458.96	944.037	-1.87325	0.00194398	0.0466971	down	[J]	Translation, ribosomal structure and biogenesis	Molecular Function: translation elongation factor activity (GO:0003746);; Molecular Function: GTPase activity (GO:0003924);; Molecular Function: GTP binding (GO:0005525);; Cellular Component: mitochondrion (GO:0005739);; Biological Process: mitochondrial translational elongation (GO:0070125);;	K02355|0.0|haw:110371073|K02355 fusA; elongation factor G	[J]	Translation, ribosomal structure and biogenesis	Elongation factor Tu GTP binding domain;; Elongation factor G, domain IV;; Elongation Factor G, domain II;; Elongation factor G C-terminus;; Elongation factor Tu domain 2	Elongation factor G, mitochondrial OS=Culex quinquefasciatus OX=7176 GN=CPIJ005834 PE=3 SV=1	elongation factor G, mitochondrial [Spodoptera litura]
TRINITY_DN26222_c0_g1	204.812	28.4819	-2.84604	3.23e-10	1.45e-07	down	[IQR]	--	Molecular Function: alcohol dehydrogenase (NAD) activity (GO:0004022);; Biological Process: alcohol metabolic process (GO:0006066);;	K00069|2e-90|tnl:113504616|K00069 HPGD; 15-hydroxyprostaglandin dehydrogenase (NAD) [EC:1.1.1.141]	[IR]	--	short chain dehydrogenase;; Enoyl-(Acyl carrier protein) reductase;; KR domain;; 3-beta hydroxysteroid dehydrogenase/isomerase family;; Polysaccharide biosynthesis protein;; NAD dependent epimerase/dehydratase family	Alcohol dehydrogenase OS=Zaprionus tuberculatus OX=7297 GN=Adh PE=3 SV=1	15-hydroxyprostaglandin dehydrogenase [NAD(+)]-like [Spodoptera litura]
TRINITY_DN17669_c0_g1	0.364207	18.6035	5.54044	0.000132707	0.00692441	up	--	--	--	--|1e-13|pxy:105386010|hypothetical protein	--	--	Transcription activator MBF2	--	hypothetical protein RR46_01631 [Papilio xuthus]
TRINITY_DN26515_c0_g2	133.521	50.7819	-1.39654	0.000848295	0.0265119	down	[E]	Amino acid transport and metabolism	Molecular Function: aminopeptidase activity (GO:0004177);; Molecular Function: metallopeptidase activity (GO:0008237);; Molecular Function: manganese ion binding (GO:0030145);;	K01262|0.0|pmac:106711910|K01262 pepP; Xaa-Pro aminopeptidase [EC:3.4.11.9]	[E]	Amino acid transport and metabolism	Aminopeptidase P, N-terminal domain;; Metallopeptidase family M24	Probable Xaa-Pro aminopeptidase 3 OS=Dictyostelium discoideum OX=44689 GN=xpnpep3 PE=2 SV=1	probable Xaa-Pro aminopeptidase 3 isoform X2 [Spodoptera litura]
TRINITY_DN27514_c0_g2	3.66232	51.3865	3.72801	0.000539619	0.0191471	up	[GEPR]	--	Cellular Component: integral component of membrane (GO:0016021);; Molecular Function: transmembrane transporter activity (GO:0022891);;	--|0.0|tnl:113493359|hypothetical protein	[R]	General function prediction only	Major Facilitator Superfamily;; Sugar (and other) transporter	Putative transporter svop-1 OS=Caenorhabditis elegans OX=6239 GN=svop-1 PE=3 SV=5	organic cation/carnitine transporter 7-like [Spodoptera litura]
TRINITY_DN21212_c0_g1	2466.57	1022.9	-1.2697	0.000381814	0.0150231	down	[G]	Carbohydrate transport and metabolism	--	K01785|1e-145|haw:110382732|K01785 galM; aldose 1-epimerase [EC:5.1.3.3]	[G]	Carbohydrate transport and metabolism	Aldose 1-epimerase	--	aldose 1-epimerase [Spodoptera litura]
TRINITY_DN22961_c0_g1	1.13966	30.9918	4.80937	6.89e-06	0.000689609	up	--	--	--	K14999|1e-08|haw:110378486|K14999 CYP6; cytochrome P450 family 6 [EC:1.14.-.-]	--	--	--	--	LOW QUALITY PROTEIN: uncharacterized protein LOC111359605 [Spodoptera litura]
TRINITY_DN29585_c0_g1	19799.2	5256.93	-1.9132	0.000840944	0.0263656	down	[M]	Cell wall/membrane/envelope biogenesis	Molecular Function: amidophosphoribosyltransferase activity (GO:0004044);; Biological Process: purine nucleotide biosynthetic process (GO:0006164);; Biological Process: 'de novo' IMP biosynthetic process (GO:0006189);; Biological Process: glutamine metabolic process (GO:0006541);; Biological Process: determination of adult lifespan (GO:0008340);; Biological Process: purine nucleobase biosynthetic…	K00820|0.0|haw:110371289|K00820 glmS; glutamine---fructose-6-phosphate transaminase (isomerizing) [EC:2.6.1.16]	[M]	Cell wall/membrane/envelope biogenesis	SIS domain;; Glutamine amidotransferase domain;; Glutamine amidotransferase domain;; Glutamine amidotransferases class-II	Amidophosphoribosyltransferase OS=Drosophila melanogaster OX=7227 GN=Prat PE=1 SV=2	glutamine--fructose-6-phosphate aminotransferase [isomerizing] 1-like [Spodoptera litura]
TRINITY_DN22678_c0_g1	1545.55	149.517	-3.36905	4.19e-06	0.000465148	down	--	--	--	--	--	--	Insect cuticle protein	--	endocuticle structural glycoprotein SgAbd-5-like isoform X2 [Spodoptera litura]
TRINITY_DN26994_c2_g2	22.9727	246.207	3.42846	3.8e-05	0.0027166	up	--	--	Molecular Function: monooxygenase activity (GO:0004497);; Molecular Function: iron ion binding (GO:0005506);; Cellular Component: endoplasmic reticulum membrane (GO:0005789);; Molecular Function: oxidoreductase activity, acting on paired donors, with incorporation or reduction of molecular oxygen (GO:0016705);; Molecular Function: heme binding (GO:0020037);; Cellular Component: organelle membrane…	K14999|2e-15|haw:110378486|K14999 CYP6; cytochrome P450 family 6 [EC:1.14.-.-]	[Q]	Secondary metabolites biosynthesis, transport and catabolism	--	Cytochrome P450 9e2 OS=Blattella germanica OX=6973 GN=CYP9E2 PE=2 SV=1	uncharacterized protein LOC111359604 [Spodoptera litura]
TRINITY_DN28191_c0_g1	12.1195	859.974	6.11504	1.16e-21	3.82e-18	up	[R]	General function prediction only	Biological Process: compound eye photoreceptor cell differentiation (GO:0001751);; Molecular Function: RNA binding (GO:0003723);; Cellular Component: cytoplasm (GO:0005737);; Cellular Component: lipid droplet (GO:0005811);; Cellular Component: cytosol (GO:0005829);; Biological Process: mitochondrion organization (GO:0007005);; Biological Process: transmembrane receptor protein tyrosine kinase sig…	--|0.0|tnl:113498746|hypothetical protein	[R]	General function prediction only	Ankyrin repeats (3 copies);; Ankyrin repeats (many copies);; Ankyrin repeat;; Ankyrin repeats (many copies);; Ankyrin repeat	Ankyrin repeat and KH domain-containing protein mask OS=Drosophila melanogaster OX=7227 GN=mask PE=1 SV=2	ankyrin repeat domain-containing protein 50-like isoform X1 [Spodoptera litura]
TRINITY_DN30811_c0_g1	147.164	1474.41	3.32558	3.89e-12	2.81e-09	up	--	--	Cellular Component: plasma membrane (GO:0005886);; Cellular Component: integral component of membrane (GO:0016021);;	K23573|1e-62|haw:110380567|K23573 DSPP; dentin sialophosphoprotein	--	--	--	Sporozoite surface protein 2 OS=Plasmodium yoelii yoelii OX=73239 GN=SSP2 PE=1 SV=2	proteoglycan 4-like isoform X4 [Spodoptera litura]
TRINITY_DN24813_c1_g1	216.32	902.504	2.0606	0.000484948	0.0177246	up	--	--	Cellular Component: extracellular region (GO:0005576);; Molecular Function: carbohydrate binding (GO:0030246);;	--|1e-179|tnl:113505748|hypothetical protein	[TV]	--	Lectin C-type domain	Hemolymph lipopolysaccharide-binding protein OS=Periplaneta americana OX=6978 PE=1 SV=1	LL13 [Spodoptera exigua]
TRINITY_DN30362_c0_g1	3509.44	539.221	-2.70222	0.00136439	0.0372573	down	[G]	Carbohydrate transport and metabolism	Molecular Function: galactokinase activity (GO:0004335);; Molecular Function: ATP binding (GO:0005524);; Cellular Component: cytoplasm (GO:0005737);; Biological Process: galactose catabolic process (GO:0019388);;	K18674|0.0|haw:110380006|K18674 GALK2; N-acetylgalactosamine kinase [EC:2.7.1.157]	[G]	Carbohydrate transport and metabolism	Galactokinase galactose-binding signature;; GHMP kinases N terminal domain	Galactokinase OS=Dictyostelium discoideum OX=44689 GN=galK PE=3 SV=1	N-acetylgalactosamine kinase-like [Spodoptera litura]
TRINITY_DN20654_c2_g3	24860.5	3962.85	-2.64922	0.000385489	0.0151275	down	--	--	Molecular Function: structural constituent of cuticle (GO:0042302);;	--|4e-54|tnl:113495420|hypothetical protein	--	--	--	Larval cuticle protein LCP-30 OS=Bombyx mori OX=7091 GN=LCP30 PE=1 SV=2	larval cuticle protein LCP-30-like [Spodoptera litura]
TRINITY_DN23360_c4_g1	1.25751	332.398	8.19948	2.88e-14	2.76e-11	up	--	--	Molecular Function: DNA binding (GO:0003677);;	--	[T]	Signal transduction mechanisms	--	Uncharacterized proline-rich protein (Fragment) OS=Owenia fusiformis OX=6347 PE=4 SV=1	hypothetical protein OCBIM_22009371mg, partial [Octopus bimaculoides]
TRINITY_DN17455_c0_g1	912.622	192.282	-2.24575	2.25e-06	0.00028563	down	[T]	Signal transduction mechanisms	--	K22075|1e-56|haw:110381602|K22075 BOLA3; BolA-like protein 3	[T]	Signal transduction mechanisms	BolA-like protein	BolA-like protein DDB_G0274439 OS=Dictyostelium discoideum OX=44689 GN=DDB_G0274439 PE=3 SV=1	bolA-like protein 3 [Spodoptera litura]
TRINITY_DN32154_c5_g1	153.143	657.898	2.10403	5.81e-08	1.35e-05	up	[C]	Energy production and conversion	Molecular Function: deoxyribonuclease II activity (GO:0004531);; Cellular Component: extracellular region (GO:0005576);; Biological Process: apoptotic process (GO:0006915);;	K01158|0.0|haw:110380895|K01158 DNASE2; deoxyribonuclease II [EC:3.1.22.1]	[L]	Replication, recombination and repair	Deoxyribonuclease II;; Aldehyde dehydrogenase family	Plancitoxin-1 OS=Acanthaster planci OX=133434 PE=1 SV=1	uncharacterized protein LOC111356675 [Spodoptera litura]
TRINITY_DN24849_c0_g2	4894.34	543.358	-3.1715	9.1e-08	1.93e-05	down	--	--	--	--|3e-54|haw:110376711|hypothetical protein	--	--	--	--	mucin-2-like [Spodoptera litura]
TRINITY_DN19236_c0_g1	290.77	69.4295	-2.06298	0.000214295	0.00990503	down	[O]	Posttranslational modification, protein turnover, chaperones	Molecular Function: ATP binding (GO:0005524);; Cellular Component: mitochondrion (GO:0005739);; Cellular Component: mitochondrial inner membrane (GO:0005743);; Cellular Component: mitochondrial matrix (GO:0005759);; Cellular Component: lipid droplet (GO:0005811);; Cellular Component: cytosol (GO:0005829);; Cellular Component: microtubule associated complex (GO:0005875);; Biological Process: 'de n…	K04077|5e-56|haw:110379863|K04077 groEL; chaperonin GroEL	[O]	Posttranslational modification, protein turnover, chaperones	--	Heat shock protein 60A OS=Drosophila melanogaster OX=7227 GN=Hsp60A PE=1 SV=3	60 kDa heat shock protein, mitochondrial-like [Spodoptera litura]
TRINITY_DN28427_c1_g2	2493.45	231.197	-3.43103	0.000816037	0.0258583	down	[GEPR]	--	Cellular Component: integral component of plasma membrane (GO:0005887);; Biological Process: apoptotic process (GO:0006915);; Molecular Function: organic anion transmembrane transporter activity (GO:0008514);; Cellular Component: integral component of membrane (GO:0016021);;	--|0.0|haw:110377882|hypothetical protein	[R]	General function prediction only	Sugar (and other) transporter;; Major Facilitator Superfamily	Organic cation transporter protein OS=Drosophila melanogaster OX=7227 GN=Orct PE=1 SV=1	organic cation transporter protein-like isoform X2 [Spodoptera litura]
TRINITY_DN25966_c4_g1	294.502	60.5363	-2.28033	4.05e-05	0.00284088	down	--	--	--	--|1e-112|haw:110376831|hypothetical protein	--	--	--	--	uncharacterized protein LOC111348777 [Spodoptera litura]
TRINITY_DN20957_c0_g3	1676.83	647.175	-1.37315	0.000117049	0.00631681	down	--	--	--	K17401|0.0|haw:110369683|K17401 MRPS22; small subunit ribosomal protein S22	[J]	Translation, ribosomal structure and biogenesis	Mitochondrial 28S ribosomal protein S22	--	28S ribosomal protein S22, mitochondrial [Spodoptera litura]
TRINITY_DN29798_c0_g1	1823.01	501.426	-1.86249	0.00133281	0.0365633	down	--	--	Cellular Component: extracellular matrix (GO:0005578);; Cellular Component: plasma membrane (GO:0005886);; Biological Process: axonogenesis (GO:0007409);; Biological Process: wing disc morphogenesis (GO:0007472);; Biological Process: imaginal disc-derived wing morphogenesis (GO:0007476);; Biological Process: imaginal disc-derived leg morphogenesis (GO:0007480);; Biological Process: motor neuron a…	K08110|0.0|haw:110376566|K08110 GPC4; glypican 4	[T]	Signal transduction mechanisms	Glypican	Division abnormally delayed protein OS=Drosophila melanogaster OX=7227 GN=dally PE=1 SV=1	glypican-6 [Spodoptera litura]
TRINITY_DN18570_c0_g1	571.418	114.395	-2.31861	4.45e-06	0.000485013	down	[IQR]	--	Molecular Function: 3-hydroxyacyl-CoA dehydrogenase activity (GO:0003857);; Molecular Function: estradiol 17-beta-dehydrogenase activity (GO:0004303);; Cellular Component: mitochondrion (GO:0005739);; Cellular Component: lipid droplet (GO:0005811);; Cellular Component: cytosol (GO:0005829);; Cellular Component: microtubule associated complex (GO:0005875);; Biological Process: fatty acid metabolic…	K08683|1e-161|haw:110371359|K08683 HSD17B10; 3-hydroxyacyl-CoA dehydrogenase / 3-hydroxy-2-methylbutyryl-CoA dehydrogenase [EC:1.1.1.35 1.1.1.178]	[Q]	Secondary metabolites biosynthesis, transport and catabolism	short chain dehydrogenase;; Enoyl-(Acyl carrier protein) reductase;; KR domain	3-hydroxyacyl-CoA dehydrogenase type-2 OS=Drosophila melanogaster OX=7227 GN=scu PE=1 SV=1	3-hydroxyacyl-CoA dehydrogenase type-2-like [Spodoptera litura]
TRINITY_DN20192_c5_g1	43.9238	456.843	3.37814	0.00112021	0.0322855	up	--	--	Molecular Function: carbohydrate binding (GO:0030246);;	K10092|7e-38|haw:110369846|K10092 LGALS7; galectin-7	[W]	Extracellular structures	Galactoside-binding lectin	32 kDa beta-galactoside-binding lectin OS=Haemonchus contortus OX=6289 GN=GAL-1 PE=2 SV=1	galectin-9-like [Spodoptera litura]
TRINITY_DN16518_c0_g1	2.84284	167.372	5.84966	3.34e-10	1.48e-07	up	--	--	--	--|9e-44|pmac:106709162|hypothetical protein	--	--	--	--	uncharacterized protein LOC111355145 [Spodoptera litura]
TRINITY_DN25494_c0_g1	1046.76	4276.61	2.03082	0.00109057	0.0316779	up	[Z]	Cytoskeleton	Molecular Function: actin binding (GO:0003779);; Biological Process: cell adhesion (GO:0007155);; Biological Process: myoblast fusion (GO:0007520);; Biological Process: regulation of cell shape (GO:0008360);; Biological Process: regulation of myoblast fusion (GO:1901739);;	K20526|4e-74|tnl:113508372|K20526 TAGLN; transgelin	[Z]	Cytoskeleton	Calponin homology (CH) domain;; Calponin family repeat	Muscle-specific protein 20 OS=Drosophila melanogaster OX=7227 GN=Mp20 PE=2 SV=2	muscle-specific protein 20 [Spodoptera litura]
TRINITY_DN21345_c6_g1	774.707	195.458	-1.98584	5.02e-05	0.00331137	down	--	--	Molecular Function: structural constituent of ribosome (GO:0003735);; Cellular Component: mitochondrion (GO:0005739);; Cellular Component: mitochondrial large ribosomal subunit (GO:0005762);; Biological Process: translation (GO:0006412);; Molecular Function: 5S rRNA binding (GO:0008097);;	K02881|1e-104|haw:110380194|K02881 RP-L18; large subunit ribosomal protein L18	[J]	Translation, ribosomal structure and biogenesis	--	39S ribosomal protein L18, mitochondrial OS=Caenorhabditis elegans OX=6239 GN=mrpl-18 PE=3 SV=1	39S ribosomal protein L18, mitochondrial [Spodoptera litura]
TRINITY_DN27687_c0_g1	8.44353	133.725	3.95547	3.48e-07	6.24e-05	up	[K]	Transcription	Molecular Function: DNA binding (GO:0003677);; Molecular Function: mRNA binding (GO:0003729);; Cellular Component: cytoplasm (GO:0005737);; Biological Process: regulation of transcription, DNA-templated (GO:0006355);; Molecular Function: zinc ion binding (GO:0008270);; Biological Process: positive regulation of insulin receptor signaling pathway (GO:0046628);; Biological Process: oogenesis (GO:00…	K18754|1e-103|haw:110384171|K18754 LIN28; protein lin-28	[J]	Translation, ribosomal structure and biogenesis	'Cold-shock' DNA-binding domain;; Zinc knuckle	Protein lin-28 homolog OS=Drosophila melanogaster OX=7227 GN=lin-28 PE=2 SV=2	protein lin-28 homolog isoform X3 [Spodoptera litura]
TRINITY_DN21866_c1_g1	1810.43	486.848	-1.89479	0.000227842	0.0103061	down	[I]	Lipid transport and metabolism	Molecular Function: carboxylic ester hydrolase activity (GO:0052689);;	--|0.0|haw:110374962|hypothetical protein	[R]	General function prediction only	Carboxylesterase family;; alpha/beta hydrolase fold;; Prolyl oligopeptidase family	Esterase B1 OS=Culex pipiens OX=7175 GN=B1 PE=3 SV=1	carboxylesterase 1C-like [Spodoptera litura]
TRINITY_DN29002_c0_g1	22.8397	132.967	2.55449	4.86e-05	0.00323144	up	--	--	--	--|1e-108|haw:110377027|hypothetical protein	--	--	--	--	hypothetical protein B5V51_8715 [Heliothis virescens]
TRINITY_DN28820_c2_g1	47.3595	147.675	1.63411	0.000887176	0.0272952	up	--	--	Molecular Function: dolichyl-phosphate-mannose-protein mannosyltransferase activity (GO:0004169);; Cellular Component: endoplasmic reticulum (GO:0005783);; Cellular Component: endoplasmic reticulum membrane (GO:0005789);; Biological Process: muscle organ development (GO:0007517);; Biological Process: somatic muscle development (GO:0007525);; Cellular Component: integral component of membrane (GO:…	K00728|0.0|haw:110379543|K00728 POMT; dolichyl-phosphate-mannose-protein mannosyltransferase [EC:2.4.1.109]	[O]	Posttranslational modification, protein turnover, chaperones	Dolichyl-phosphate-mannose-protein mannosyltransferase;; C-terminal four TMM region of protein-O-mannosyltransferase;; MIR domain	Protein O-mannosyl-transferase 2 OS=Drosophila pseudoobscura pseudoobscura OX=46245 GN=tw PE=3 SV=1	protein O-mannosyl-transferase 2 [Spodoptera litura]
[truncated: 111 more rows]

## Sheet: Control vs SiO2.Mix.annotation
#id	baseMeanA	baseMeanB	log2(LC30/CK)	pvalue	padj	regulated	COG_class	COG_class_annotation	GO_annotation	KEGG_annotation	KOG_class	KOG_class_annotation	Pfam_annotation	Swissprot_annotation	nr_annotation
[truncated: 2,852 more rows]
